# Supplementary material for: Synchronous and basic asynchronous hydrogen-atom abstraction of benzylic substrates by high-valent iron–oxo porphyrin species
Source: Royal Society of Chemistry journal article supplement (doi:10.1039/d3qo01827j), 2023-12-15
Supplement: d3qo01827j1.pdf [file d3qo01827j1.pdf]

## Supporting Information

# Synchronous and Basic Asynchronous Hydrogen Atom Abstraction of Benzylic Substrates by High-Valent Iron-Oxo Porphyrin Species

Xiahe Chen, Yun-Fang Yang\* and Yuanbin She\*

State Key Laboratory Breeding Base of Green Chemistry-Synthesis Technology, Key Laboratory of Green Chemistry-Synthesis Technology of Zhejiang Province, College of Chemical Engineering, Zhejiang University of Technology, Hangzhou, Zhejiang 310014, China

\*E-mail: sheyb@zjut.edu.cn

\*E-mail: yangyf@zjut.edu.cn

## Table of Contents

|                                                                                                                                                      |    |
|------------------------------------------------------------------------------------------------------------------------------------------------------|----|
| The computational $pK_a$ ( $pK_{a(\text{comput.})}$ ) vs. experimental $pK_a$ ( $pK_{a(\text{exp.})}$ ) .....                                        | 2  |
| Gibbs free energy profiles for ethylbenzene benzylic C–H hydroxylation with <b>Cat1</b> .....                                                        | 2  |
| BDE or $pK_a$ of unsubstituted substrates versus BDE or $pK_a$ of substrates bearing an electron-withdrawing group $-\text{NO}_2$ .....              | 3  |
| Activation free energy $\Delta G^\ddagger$ versus BDE and $pK_a$ in the system of <b>Cat1</b> with <b>b1-b15</b> .....                               | 4  |
| Bimodal BEP relationships in the <b>Cat1</b> .....                                                                                                   | 5  |
| Mulliken charge and natural population analysis (NPA) charge of <b>Cat1</b> and <b>Cat2</b> .....                                                    | 5  |
| Activation free energy $\Delta G^\ddagger$ versus BDE and $pK_a$ in the system of <b>Cat2</b> with <b>a1-a15</b> .....                               | 6  |
| Activation free energy $\Delta G^\ddagger$ versus BDE and $pK_a$ in the system of <b>Cat3</b> with <b>b1-b15</b> .....                               | 6  |
| Optimized geometries and Gibbs free energy for transition state of <b>Cat4</b> with <b>b2</b> .....                                                  | 7  |
| Electrostatic potential (ESP) surface of <b>Cat4</b> .....                                                                                           | 7  |
| Activation free energy $\Delta G^\ddagger$ versus BDE and $pK_a$ in the system of [ <b>Cat4</b> ] <b>K</b> with <b>b1-b15</b> .....                  | 8  |
| NPA charges (Q) and spin densities ( $\rho$ ) ( <b>Cat1</b> /( <b>a1-a15</b> )) .....                                                                | 9  |
| NPA charges (Q) and spin densities ( $\rho$ ) ( <b>Cat4</b> /( <b>b1-b15</b> )) .....                                                                | 9  |
| The LMOs for reaction of <b>b11</b> with <b>Cat2</b> .....                                                                                           | 10 |
| Thermodynamic Cycle for $pK_a$ Calculations .....                                                                                                    | 11 |
| The doublet and quartet transition state and Gibbs free energy of the HAA step for benzylic C–H hydroxylation ( <b>a1-a15</b> ) by <b>Cat1</b> ..... | 12 |
| Asynchronicity Factor ( $\eta$ ) .....                                                                                                               | 13 |
| Electronic energies and free energies .....                                                                                                          | 14 |
| Cartesian coordinates of the structures .....                                                                                                        | 19 |

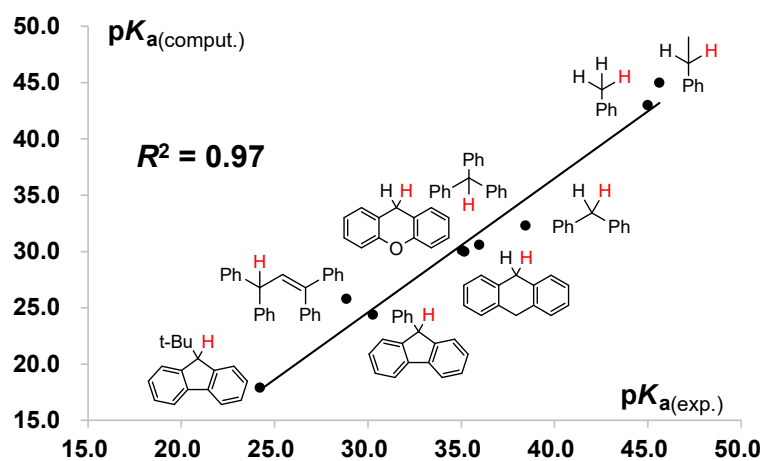

**Figure S1.** Plot of computational  $pK_a$  ( $pK_{a(\text{comput.})}$ ) versus experimental  $pK_a$  ( $pK_{a(\text{exp.})}$ ). Experimental  $pK_a$  data taken from the literature.<sup>1</sup>

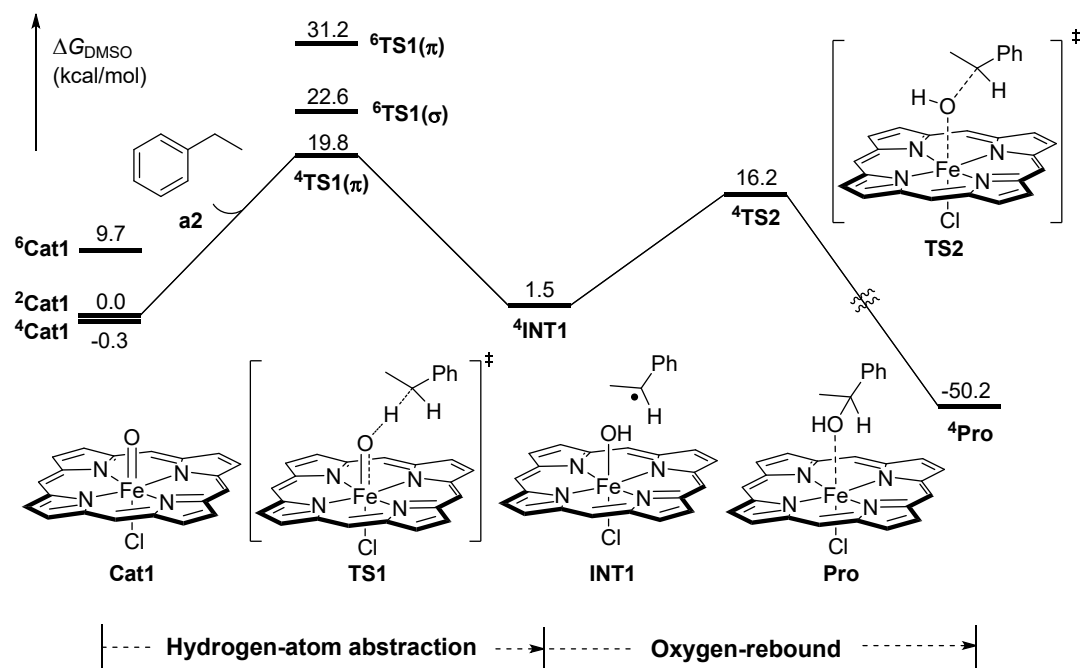

**Figure S2.** Gibbs free energy profiles for ethylbenzene benzylic C–H hydroxylation with **Cat1**.

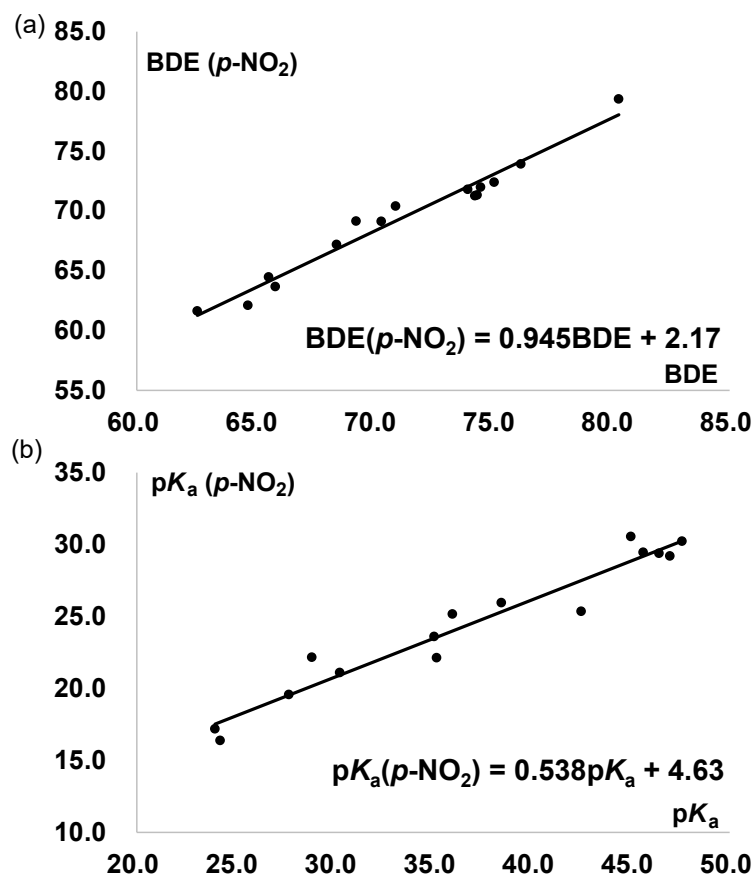

**Figure S3.** (a) Plot of BDE of unsubstituted substrates versus BDE of substrates bearing an electron-withdrawing group  $-NO_2$ . (b) Plot of  $pK_a$  of unsubstituted substrates versus  $pK_a$  of substrates bearing an electron-withdrawing group  $-NO_2$ .

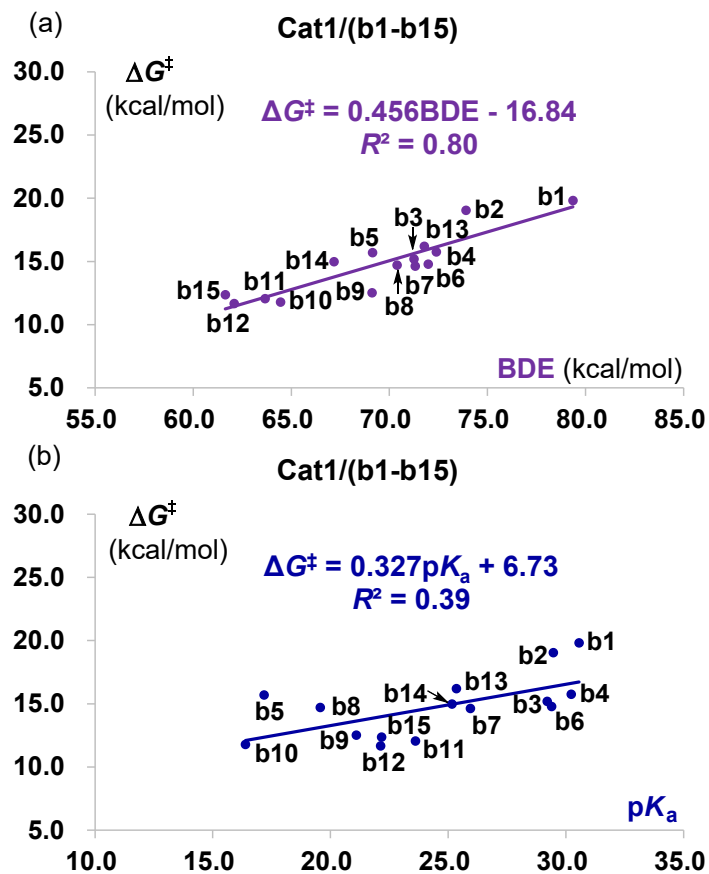

**Figure S4.** Activation free energy  $\Delta G^\ddagger$  versus BDE (a) and  $\text{p}K_a$  (b) in the system of **Cat1** with **b1-b15**.

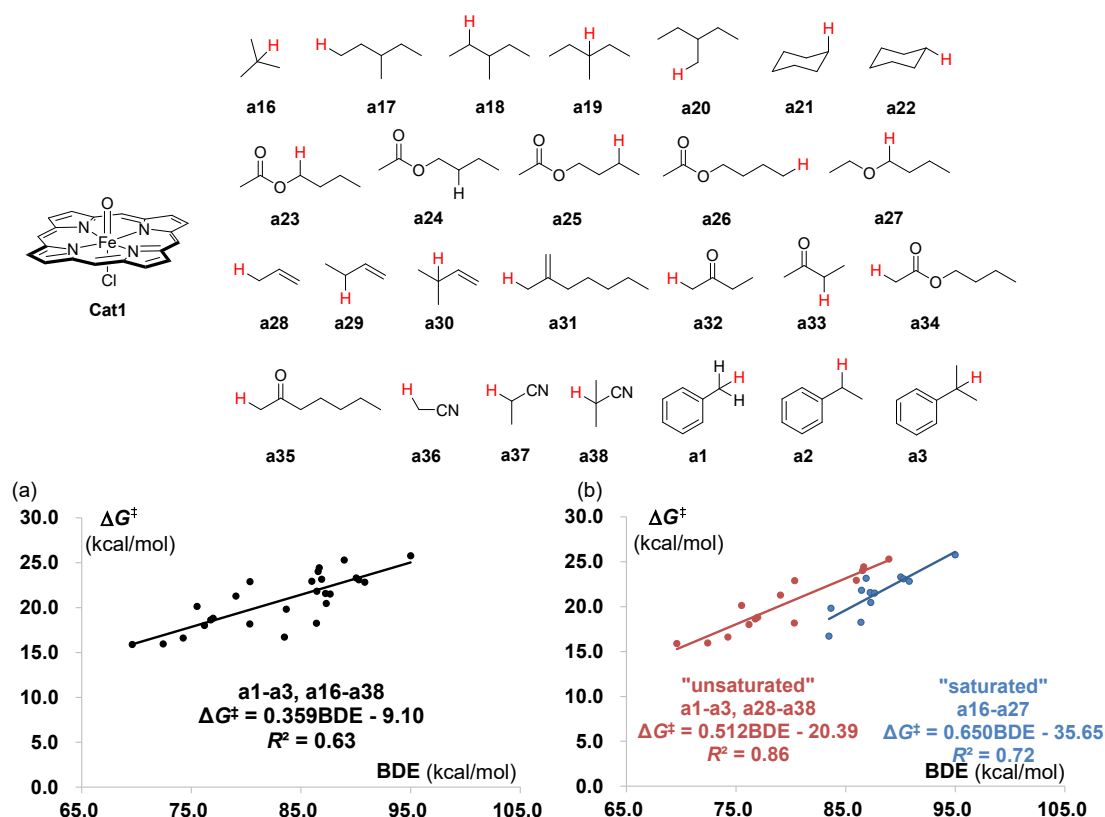

**Figure S5.** Activation free energy of hydroxylation by **Cat1** versus BDE. (a) All the substrates investigated in this study. (b) Red dots are C–H bonds in the “unsaturated group”; blue dots are C–H bonds in the “saturated group”.

The electron-donating mesitylene substituents are anticipated to augment the electron density at the iron center. Therefore, Mulliken charge and natural population analysis (NPA) charge of **Cat1** and **Cat2** were calculated to confirm their electronic nature. The results showed that substituting electron-donating groups at the *meso*-positions of the porphyrin ring increases the electron density around the central metal.

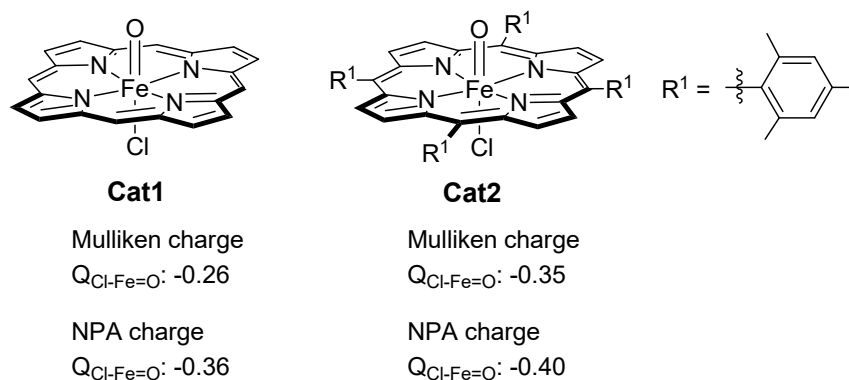

**Figure S6.** Mulliken charge and natural population analysis (NPA) charge (Q in e) of **Cat1** and **Cat2**.

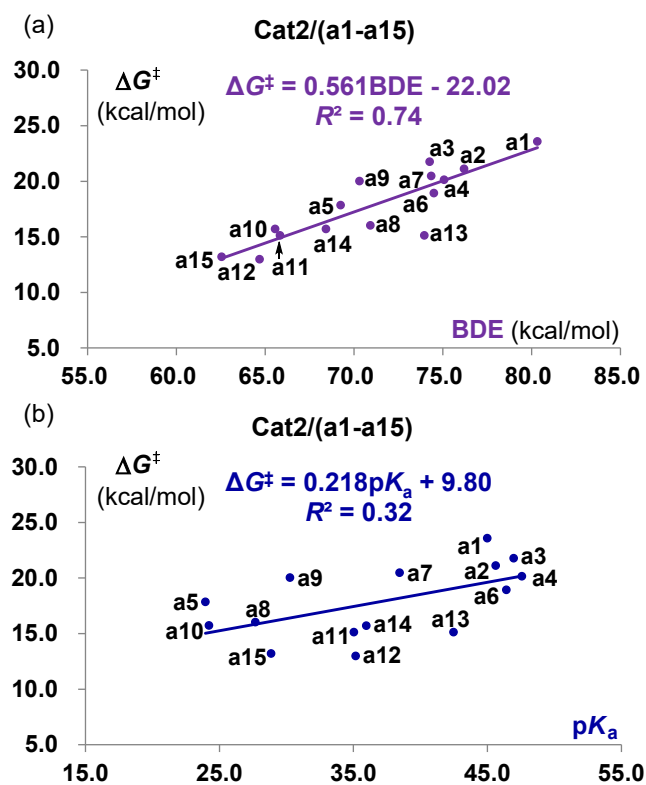

**Figure S7.** Activation free energy  $\Delta G^\ddagger$  versus BDE (a) and  $\text{p}K_a$  (b) in the system of **Cat2** with **a1-a15**.

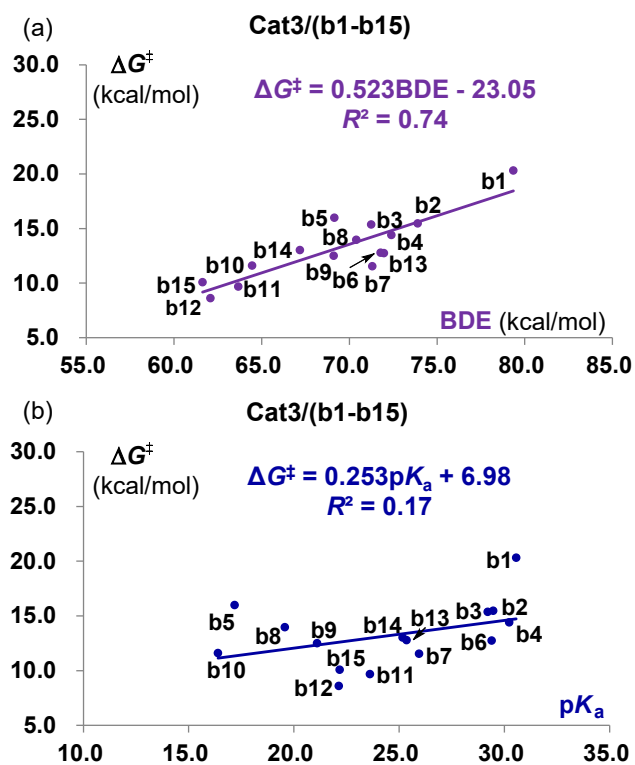

**Figure S8.** Activation free energy  $\Delta G^\ddagger$  versus BDE (a) and  $\text{p}K_a$  (b) in the system of **Cat3** with **b1-b15**.

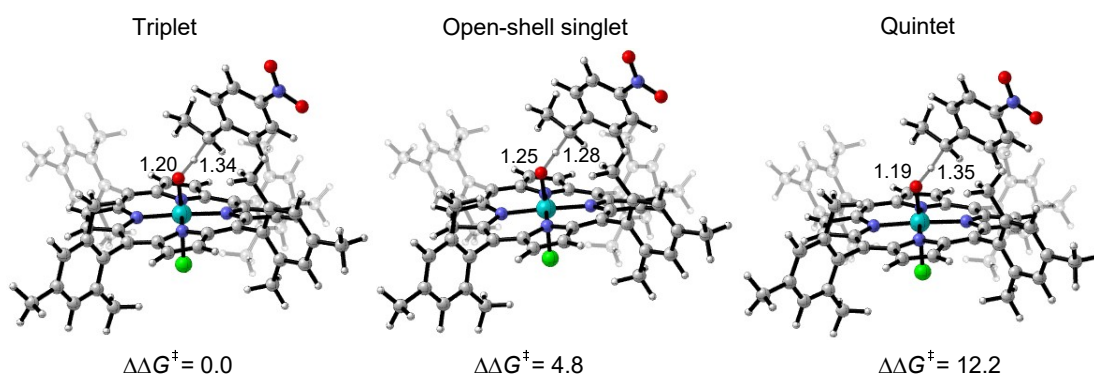

**Figure S9.** Optimized geometries and Gibbs free energy for transition states of **Cat4** with **b2**. The distances are shown in Å. The energies are shown in kcal/mol.

The potential positions for  $K^+$  on **Cat4** were analyzed using electrostatic potential (ESP). The ESP surface analysis of **Cat4** demonstrates that areas with more negative ESP values (indicated by red surface) are prominently located around the central metal. These regions, which have a stronger propensity to attract protons, are the most probable sites for interaction with the cations. Consequently,  $K^+$  is situated within the negative ESP area, aligning with O (**[Cat4]K**) or with Cl (**[Cat4]K-cf2**) on respective sides. Although  ${}^3[\text{Cat4}]\text{K}$  is 1.4 kcal/mol higher than  ${}^3[\text{Cat4}]\text{K-cf2}$ ,  ${}^3\text{TS2}[\text{K}]$  is 6.0 kcal/mol lower than  ${}^3\text{TS2}[\text{K}]\text{-cf2}$ . Therefore,  $K^+$  was placed on the O side for further investigations.

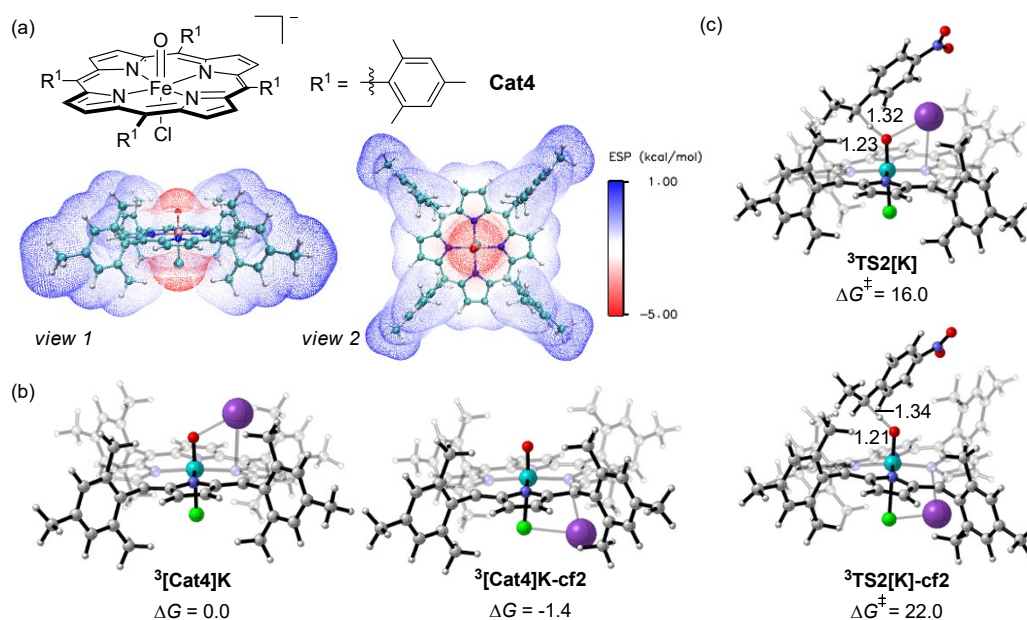

**Figure S10.** (a) Electrostatic potential (ESP) surface of **Cat4**, optimized geometries and Gibbs free energy for  ${}^3[\text{Cat4}]\text{K}$ ,  ${}^3[\text{Cat4}]\text{K-cf2}$  (b),  ${}^3\text{TS2}[\text{K}]$  and  ${}^3\text{TS2}[\text{K}]\text{-cf2}$  (c). The distances are shown in Å. The energies are shown in kcal/mol.

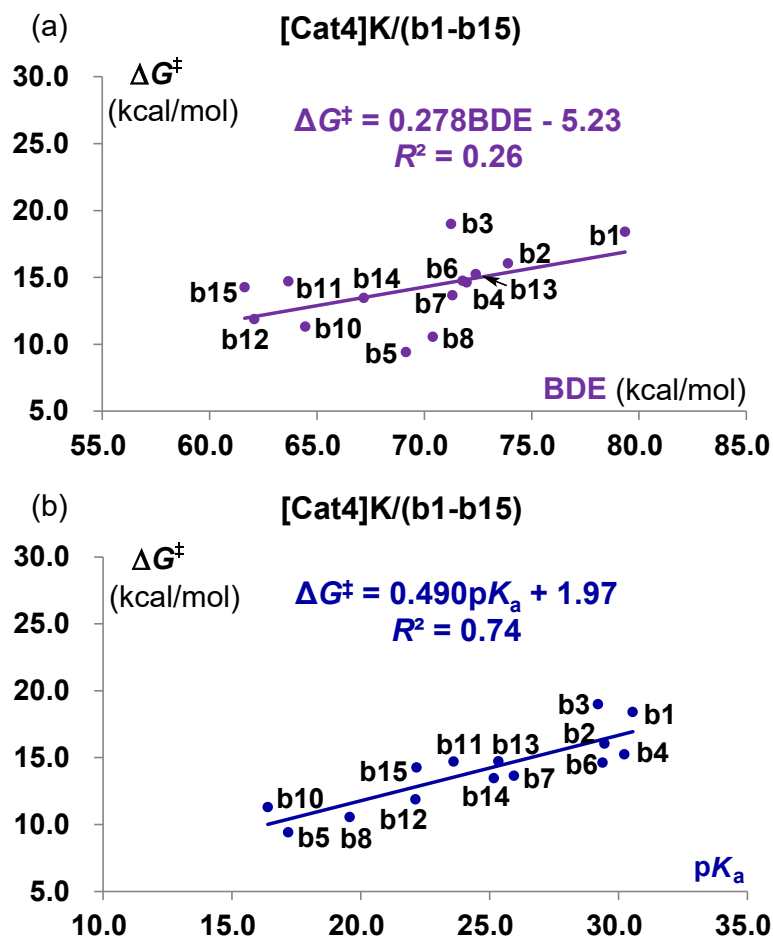

**Figure S11.** Activation free energy ( $\Delta G^\ddagger$ ) versus BDE (a) and  $pK_a$  (b) in the system of [Cat4]K with **b1-b15**, with exception of anomalous result for substrate **b9** (not shown), potentially attributed to steric effects.



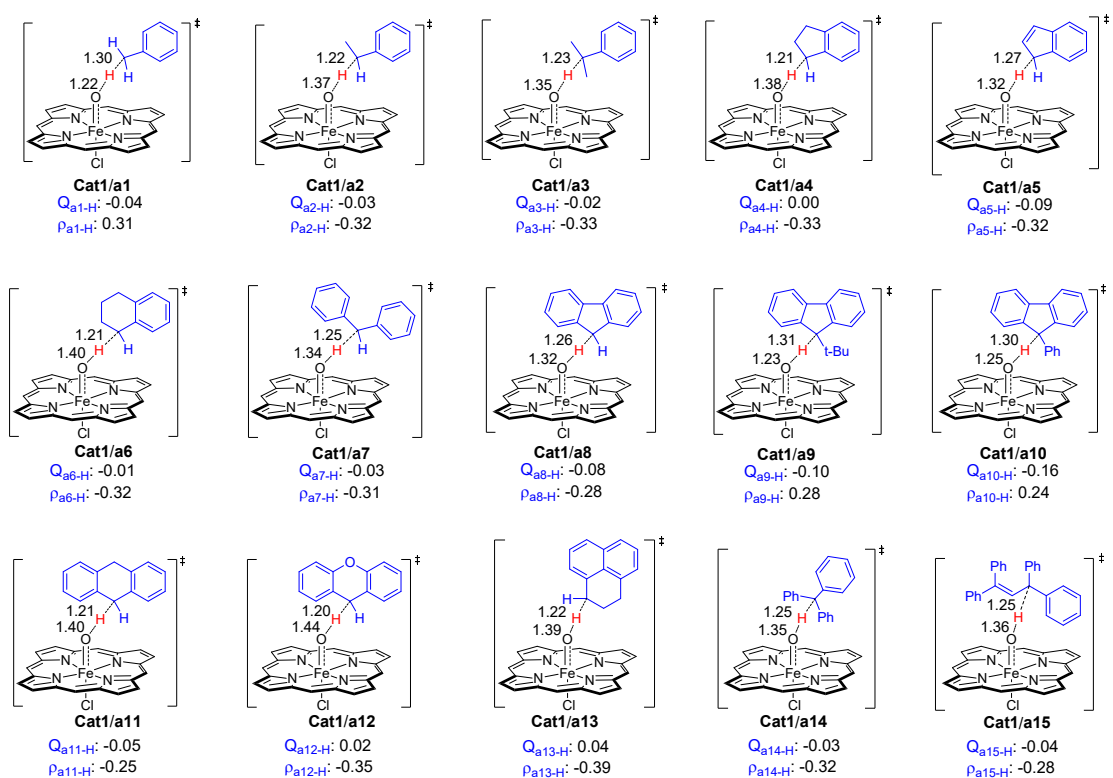

**Figure S12.** Geometric parameters (bond length in Å) along with NPA charges (Q) and spin densities ( $\rho$ ) on the hydrogen-atom-abstracted substrate moiety.

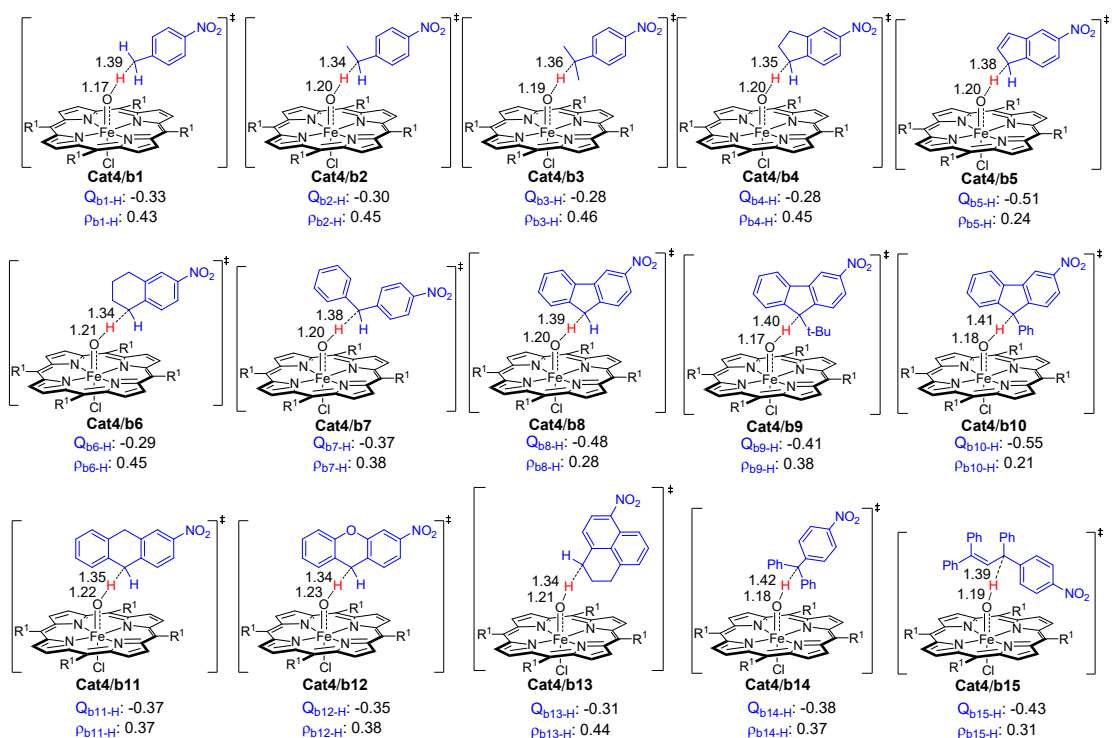

**Figure S13.** Geometric parameters (bond length in Å) along with NPA charges (Q) and spin densities ( $\rho$ ) on the hydrogen-atom-abstracted substrate moiety.

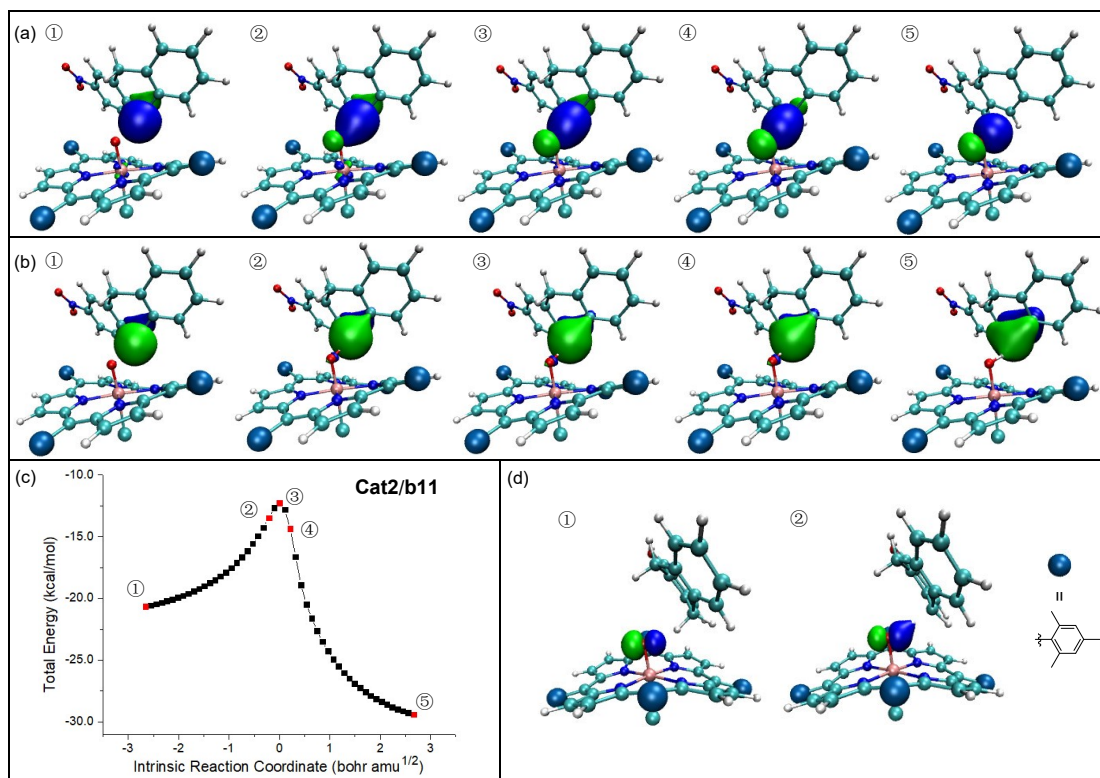

**Figure S14.** (a)  $\alpha$ -LMO and (b)  $\beta$ -LMO analysis along the intrinsic reaction coordinate (IRC) between **Cat2** and **b11**. (c) Plots of the change in electronic energies along the IRC for **Cat2/b11** case. (d)  $\alpha$ -LMO of the oxo group in the **Cat2/b11** case.

## Thermodynamic Cycle for $pK_a$ Calculations

The  $pK_a$  for a reaction  $RH(aq) \rightleftharpoons H^+(aq) + R^-(aq)$  is given by:

$$pK_a = -\lg K_a = \Delta G_{aq}/(2.303RT)$$

where  $K_a$  is the equilibrium constant for the deprotonation of the acid,  $R$  is the universal gas constant (0.00198 kcal/(mol\*K)),  $T$  refers to the temperature.

The Gibbs free energy change ( $\Delta G_{aq}$ ) is calculated according to the following thermodynamic cycle and equation:

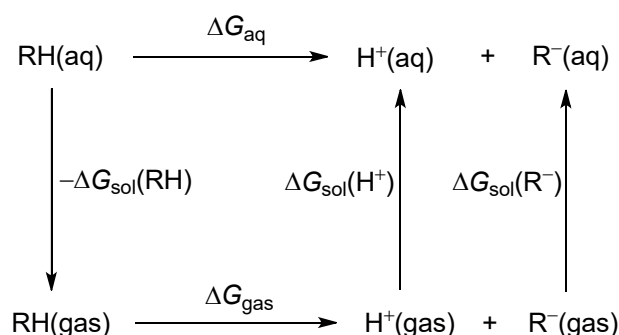

$$\begin{aligned}
 \Delta G_{aq} &= \Delta G_{gas} + \Delta \Delta G_{sol} \\
 \Delta G_{gas} &= G_{gas}(H^+) + G_{gas}(R^-) + G_{gas}(RH) \\
 \Delta \Delta G_{sol} &= \Delta G_{sol}(H^+) + \Delta G_{sol}(R^-) - \Delta G_{sol}(RH)
 \end{aligned}$$

It should be noted that computational methods poorly reproduce the energies of  $H^+$ . In this work, we have used  $G_{gas}(H^+) = -6.28$  kcal/mol and  $\Delta G_{sol}(H^+) = -265.9$  kcal/mol, on the basis of the recommendation of Tissandier and Kelly.<sup>2</sup> It should be emphasized that the calculated gas-phase energies are for a standard state of 1 atm but solvation energies use a standard state of 1 mol/L. The free energy change of 1 mol of an ideal gas from 1 atm to 1 mol/L at 298 K is  $RT \ln(24.4654) = 1.89$  kcal/mol.<sup>3</sup>  $\Delta G_{sol}(H^+) = -265.9$  kcal/mol + 1.89 kcal/mol = -264.01 kcal/mol.

**Table S1. The doublet and quartet transition state and Gibbs free energy of the HAA step for benzylic C–H hydroxylation (a1-a15) by Cat1**

| Transition state | <sup>2</sup> TS( $\pi$ ) | <sup>4</sup> TS( $\pi$ ) |
|------------------|--------------------------|--------------------------|
| <b>Cat1/a1</b>   | 18.2                     | 20.6                     |
| <b>Cat1/a2</b>   | 18.0                     | 19.8                     |
| <b>Cat1/a3</b>   | 16.6                     | 18.9                     |
| <b>Cat1/a4</b>   | 16.2                     | 18.2                     |
| <b>Cat1/a5</b>   | 16.4                     | 17.1                     |
| <b>Cat1/a6</b>   | 16.0                     | 17.9                     |
| <b>Cat1/a7</b>   | 17.1                     | 19.0                     |
| <b>Cat1/a8</b>   | 15.9                     | 17.1                     |
| <b>Cat1/a9</b>   | 12.5                     | 15.5                     |
| <b>Cat1/a10</b>  | 11.4                     | 13.2                     |
| <b>Cat1/a11</b>  | 12.1                     | 13.9                     |
| <b>Cat1/a12</b>  | 10.3                     | 12.0                     |
| <b>Cat1/a13</b>  | 14.3                     | 16.3                     |
| <b>Cat1/a14</b>  | 15.7                     | 17.3                     |
| <b>Cat1/a15</b>  | 12.5                     | 14.0                     |

## Asynchronicity Factor ( $\eta$ )

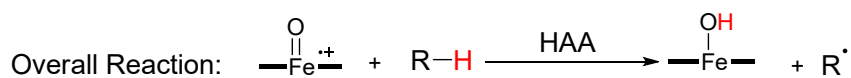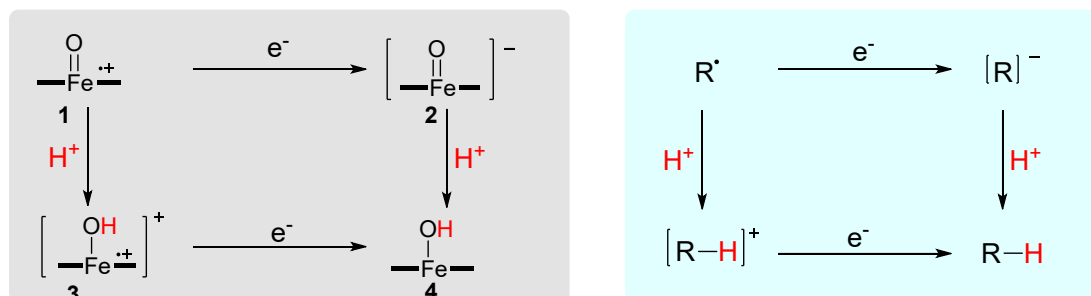

$$\text{Asynchronicity Factor } (\eta) = (1/\sqrt{2}) * [G(\text{R}^\cdot) + G(\mathbf{3}) - G(\mathbf{2}) - G(\text{R-H}^+)]$$

**Scheme S1.** The two thermodynamic cycles for computing asynchronicity factor. [R·] means the structure for the radical product expected from HAA step; [R-H]<sup>+</sup> means the structure that was oxidized by one electron; [R]<sup>-</sup> means the structure after deprotonating the acidic C-H bond.

**Table S2. Calculated asynchronicity factors ( $\eta$ ) in mV**

| Reaction | $\eta$ (mV) | Reaction | $\eta$ (mV) | Reaction | $\eta$ (mV) |
|----------|-------------|----------|-------------|----------|-------------|
| Cat1/a1  | 749         | Cat2/b1  | -517        | Cat4/b1  | -2199       |
| Cat1/a2  | 728         | Cat2/b2  | -582        | Cat4/b2  | -2265       |
| Cat1/a3  | 814         | Cat2/b3  | -570        | Cat4/b3  | -2252       |
| Cat1/a4  | 1000        | Cat2/b4  | -328        | Cat4/b4  | -2010       |
| Cat1/a5  | 232         | Cat2/b5  | -548        | Cat4/b5  | -2230       |
| Cat1/a6  | 937         | Cat2/b6  | -374        | Cat4/b6  | -2056       |
| Cat1/a7  | 474         | Cat2/b7  | -409        | Cat4/b7  | -2091       |
| Cat1/a8  | 381         | Cat2/b8  | -415        | Cat4/b8  | -2097       |
| Cat1/a9  | 529         | Cat2/b9  | -306        | Cat4/b9  | -1988       |
| Cat1/a10 | 215         | Cat2/b10 | -564        | Cat4/b10 | -2246       |
| Cat1/a11 | 502         | Cat2/b11 | -350        | Cat4/b11 | -2032       |
| Cat1/a12 | 745         | Cat2/b12 | -222        | Cat4/b12 | -1904       |
| Cat1/a13 | 1178        | Cat2/b13 | -57         | Cat4/b13 | -1739       |
| Cat1/a14 | 425         | Cat2/b14 | -354        | Cat4/b14 | -2036       |
| Cat1/a15 | 347         | Cat2/b15 | -211        | Cat4/b15 | -1893       |

**Table S3. Electronic Energies and Free Energies (in Hartree) of the Structures Calculated at the (U)B3LYP-D3/def2-TZVP (SMD: DMSO)//(U)B3LYP-D3/6-31G(d)-LANL2DZ Level**

| Structures | ZPVE     | TCE      | TCH      | TCG      | E            | G(E+TCG)     | Imaginary<br>Frequenc<br>y | $\Delta G^\ddagger$<br>(kcal/mol) |
|------------|----------|----------|----------|----------|--------------|--------------|----------------------------|-----------------------------------|
| Cat1/a1    | 0.402649 | 0.429994 | 0.430938 | 0.343801 | -3059.741955 | -3059.398154 | 1641.87i                   | 18.2                              |
| Cat1/a2    | 0.433122 | 0.461832 | 0.462776 | 0.373202 | -3099.075220 | -3098.702018 | 2243.10i                   | 18.0                              |
| Cat1/a3    | 0.461541 | 0.491528 | 0.492472 | 0.400500 | -3138.408885 | -3138.008385 | 1689.22i                   | 16.6                              |
| Cat1/a4    | 0.440736 | 0.469117 | 0.470061 | 0.381022 | -3137.197736 | -3136.816714 | 1849.39i                   | 16.2                              |
| Cat1/a5    | 0.415630 | 0.443663 | 0.444607 | 0.355611 | -3135.970106 | -3135.614495 | 2141.91i                   | 16.4                              |
| Cat1/a6    | 0.470469 | 0.499810 | 0.500754 | 0.410168 | -3176.535921 | -3176.125753 | 2391.09i                   | 16.0                              |
| Cat1/a7    | 0.485964 | 0.517758 | 0.518703 | 0.421228 | -3290.895691 | -3290.474463 | 2721.99i                   | 17.1                              |
| Cat1/a8    | 0.463490 | 0.494059 | 0.495003 | 0.401154 | -3289.693377 | -3289.292223 | 2303.72i                   | 15.9                              |
| Cat1/a9    | 0.576534 | 0.612427 | 0.613371 | 0.509981 | -3447.022344 | -3446.512363 | 1769.08i                   | 12.5                              |
| Cat1/a10   | 0.543402 | 0.578843 | 0.579787 | 0.475861 | -3520.848881 | -3520.373020 | 1773.08i                   | 11.4                              |
| Cat1/a11   | 0.493179 | 0.524796 | 0.525740 | 0.430124 | -3329.032264 | -3328.602140 | 2177.94i                   | 12.1                              |
| Cat1/a12   | 0.469278 | 0.500611 | 0.501555 | 0.406194 | -3364.952010 | -3364.545816 | 1338.54i                   | 10.3                              |
| Cat1/a13   | 0.488852 | 0.519535 | 0.520480 | 0.426673 | -3290.913657 | -3290.486984 | 1601.63i                   | 14.3                              |
| Cat1/a14   | 0.567356 | 0.603749 | 0.604693 | 0.497443 | -3522.040257 | -3521.542814 | 1886.92i                   | 15.7                              |
| Cat1/a15   | 0.681865 | 0.725094 | 0.726039 | 0.603226 | -3830.630236 | -3830.027010 | 1923.62i                   | 12.5                              |
| Cat1/b1    | 0.405094 | 0.434891 | 0.435835 | 0.343224 | -3264.338712 | -3263.995488 | 1824.61i                   | 19.8                              |
| Cat1/b2    | 0.433820 | 0.465277 | 0.466221 | 0.369597 | -3303.670142 | -3303.300545 | 1727.57i                   | 19.0                              |
| Cat1/b3    | 0.462167 | 0.494932 | 0.495876 | 0.397658 | -3343.008412 | -3342.610754 | 1820.41i                   | 15.2                              |
| Cat1/b4    | 0.441401 | 0.472518 | 0.473462 | 0.377414 | -3341.795593 | -3341.418179 | 1695.01i                   | 15.7                              |
| Cat1/b5    | 0.417170 | 0.447870 | 0.448815 | 0.353569 | -3340.569056 | -3340.215487 | 1821.94i                   | 15.7                              |
| Cat1/b6    | 0.471177 | 0.503298 | 0.504242 | 0.406071 | -3381.134659 | -3380.728588 | 1691.41i                   | 14.8                              |
| Cat1/b7    | 0.487115 | 0.521613 | 0.522557 | 0.418438 | -3495.493739 | -3495.075301 | 1828.18i                   | 14.6                              |
| Cat1/b8    | 0.464720 | 0.498051 | 0.498995 | 0.398055 | -3494.291458 | -3493.893403 | 1719.33i                   | 14.7                              |
| Cat1/b9    | 0.579102 | 0.617643 | 0.618588 | 0.508351 | -3651.619975 | -3651.111624 | 1843.67i                   | 12.5                              |
| Cat1/b10   | 0.546330 | 0.584325 | 0.585269 | 0.474461 | -3725.445640 | -3724.971179 | 1845.68i                   | 11.8                              |
| Cat1/b11   | 0.495415 | 0.529652 | 0.530596 | 0.427985 | -3533.630194 | -3533.202209 | 3229.14i                   | 12.0                              |
| Cat1/b12   | 0.471708 | 0.505578 | 0.506522 | 0.405175 | -3569.546784 | -3569.141609 | 1818.49i                   | 11.7                              |
| Cat1/b13   | 0.490944 | 0.524298 | 0.525242 | 0.424204 | -3495.501797 | -3495.077593 | 2193.53i                   | 16.2                              |
| Cat1/b14   | 0.568592 | 0.607734 | 0.608678 | 0.494407 | -3726.637910 | -3726.143503 | 1854.48i                   | 15.0                              |
| Cat1/b15   | 0.684420 | 0.730165 | 0.731109 | 0.602468 | -4035.229003 | -4034.626535 | 2312.76i                   | 12.4                              |
| Cat2/a1    | 1.059223 | 1.126815 | 1.127759 | 0.950772 | -4456.346132 | -4455.395360 | 1828.35i                   | 23.6                              |
| Cat2/a2    | 1.088294 | 1.157484 | 1.158428 | 0.978162 | -4495.681048 | -4494.702886 | 1791.52i                   | 21.1                              |
| Cat2/a3    | 1.116665 | 1.187292 | 1.188236 | 1.004642 | -4535.010630 | -4534.005988 | 1437.53i                   | 21.8                              |
| Cat2/a4    | 1.095755 | 1.164595 | 1.165540 | 0.986202 | -4533.802510 | -4532.816308 | 1901.91i                   | 20.1                              |
| Cat2/a5    | 1.071352 | 1.139831 | 1.140775 | 0.961227 | -4532.579278 | -4531.618051 | 1763.94i                   | 17.8                              |
| Cat2/a6    | 1.125695 | 1.195467 | 1.196411 | 1.014112 | -4573.140968 | -4572.126856 | 1745.06i                   | 18.9                              |

|          |          |          |          |          |              |              |          |      |
|----------|----------|----------|----------|----------|--------------|--------------|----------|------|
| Cat2/a7  | 1.141324 | 1.213542 | 1.214486 | 1.026323 | -4687.501196 | -4686.474873 | 1856.06i | 20.5 |
| Cat2/a8  | 1.119340 | 1.190339 | 1.191284 | 1.003115 | -4686.300946 | -4685.297831 | 1874.96i | 16.0 |
| Cat2/a9  | 1.233161 | 1.309637 | 1.310581 | 1.115974 | -4843.622227 | -4842.506253 | 1645.74i | 20.0 |
| Cat2/a10 | 1.200288 | 1.276180 | 1.277124 | 1.081446 | -4917.453415 | -4916.371969 | 1974.9i  | 15.7 |
| Cat2/a11 | 1.149281 | 1.220974 | 1.221918 | 1.036907 | -4725.640053 | -4724.603146 | 1680.94i | 15.1 |
| Cat2/a12 | 1.126206 | 1.197418 | 1.198362 | 1.012730 | -4761.560039 | -4760.547309 | 3701.39i | 13.0 |
| Cat2/a13 | 1.143589 | 1.214986 | 1.215930 | 1.029344 | -4687.520933 | -4686.491589 | 1760.25i | 15.1 |
| Cat2/a14 | 1.223271 | 1.299933 | 1.300877 | 1.104568 | -4918.653190 | -4917.548622 | 2060.16i | 15.7 |
| Cat2/a15 | 1.337829 | 1.421490 | 1.422434 | 1.209865 | -5227.241596 | -5226.031731 | 1903.88i | 13.2 |
| Cat2/b1  | 1.062662 | 1.132286 | 1.133230 | 0.952667 | -4660.944427 | -4659.991760 | 1925.13i | 25.8 |
| Cat2/b2  | 1.090752 | 1.162540 | 1.163484 | 0.975529 | -4700.281483 | -4699.305954 | 1863.34i | 19.3 |
| Cat2/b3  | 1.120292 | 1.192682 | 1.193626 | 1.008377 | -4739.609309 | -4738.600932 | 1952.85i | 25.0 |
| Cat2/b4  | 1.099317 | 1.170213 | 1.171157 | 0.987844 | -4738.400344 | -4737.412500 | 1916.33i | 23.0 |
| Cat2/b5  | 1.074408 | 1.145414 | 1.146358 | 0.960715 | -4737.181582 | -4736.220867 | 1619.58i | 16.0 |
| Cat2/b6  | 1.129177 | 1.201034 | 1.201978 | 1.015905 | -4777.739508 | -4776.723603 | 1930.6i  | 21.6 |
| Cat2/b7  | 1.145761 | 1.219646 | 1.220590 | 1.030649 | -4892.097792 | -4891.067143 | 1977.75i | 23.4 |
| Cat2/b8  | 1.122584 | 1.195802 | 1.196746 | 1.006203 | -4890.899255 | -4889.893052 | 1964.81i | 18.6 |
| Cat2/b9  | 1.236078 | 1.315018 | 1.315962 | 1.115766 | -5048.222977 | -5047.107211 | 1944.05i | 19.0 |
| Cat2/b10 | 1.203227 | 1.281579 | 1.282523 | 1.080992 | -5122.055622 | -5120.974630 | 1995.03i | 13.3 |
| Cat2/b11 | 1.152683 | 1.226355 | 1.227299 | 1.039897 | -4930.237104 | -4929.197207 | 1878.73i | 18.9 |
| Cat2/b12 | 1.128542 | 1.201892 | 1.202836 | 1.015476 | -4966.152341 | -4965.136865 | 1808.35i | 18.3 |
| Cat2/b13 | 1.146672 | 1.220279 | 1.221223 | 1.030789 | -4892.110258 | -4891.079469 | 1919.13i | 18.7 |
| Cat2/b14 | 1.22657  | 1.305293 | 1.306237 | 1.106090 | -5123.248522 | -5122.142432 | 2164.53i | 19.3 |
| Cat2/b15 | 1.341458 | 1.427001 | 1.427945 | 1.212733 | -5431.837374 | -5430.624641 | 2064.96i | 17.2 |
| Cat3/b1  | 0.564238 | 0.631915 | 0.632859 | 0.455058 | -6174.396136 | -6173.941078 | 1817.17i | 20.3 |
| Cat3/b2  | 0.595169 | 0.664416 | 0.665360 | 0.484523 | -6213.737133 | -6213.252610 | 2235.34i | 15.4 |
| Cat3/b3  | 0.62385  | 0.694116 | 0.695060 | 0.513347 | -6253.070215 | -6252.556868 | 2684.89i | 15.3 |
| Cat3/b4  | 0.602756 | 0.671602 | 0.672546 | 0.492232 | -6251.858912 | -6251.366680 | 2214.82i | 14.4 |
| Cat3/b5  | 0.578134 | 0.646357 | 0.647301 | 0.469558 | -6250.630935 | -6250.161377 | 1906.63i | 16.0 |
| Cat3/b6  | 0.632439 | 0.702276 | 0.703221 | 0.520165 | -6291.19838  | -6290.678215 | 2558.43i | 12.7 |
| Cat3/b7  | 0.648524 | 0.720672 | 0.721616 | 0.533417 | -6405.560019 | -6405.026602 | 2358.54i | 11.5 |
| Cat3/b8  | 0.625556 | 0.696414 | 0.697358 | 0.512835 | -6404.353787 | -6403.840952 | 2482.78i | 14.0 |
| Cat3/b9  | 0.740336 | 0.816494 | 0.817438 | 0.624795 | -6561.682825 | -6561.058030 | 1914.08i | 12.5 |
| Cat3/b10 | 0.706807 | 0.782553 | 0.783498 | 0.590220 | -6635.50805  | -6634.917830 | 2411.27i | 11.6 |
| Cat3/b11 | 0.655365 | 0.727198 | 0.728142 | 0.543745 | -6443.696117 | -6443.152372 | 2389.75i | 9.7  |
| Cat3/b12 | 0.631487 | 0.702974 | 0.703918 | 0.520252 | -6479.613109 | -6479.092857 | 1764.63i | 8.6  |
| Cat3/b13 | 0.650631 | 0.721772 | 0.722716 | 0.539291 | -6405.568684 | -6405.029393 | 1526.62i | 12.8 |
| Cat3/b14 | 0.729793 | 0.806407 | 0.807351 | 0.612044 | -6636.70503  | -6636.092986 | 1791.16i | 13.0 |
| Cat3/b15 | 0.845110 | 0.928382 | 0.929326 | 0.720794 | -6945.297346 | -6944.576552 | 1507.71i | 10.1 |
| Cat4/b1  | 1.062759 | 1.132154 | 1.133098 | 0.952661 | -4661.115975 | -4660.163314 | 1871.49i | 25.5 |

|             |          |          |          |          |              |              |          |      |
|-------------|----------|----------|----------|----------|--------------|--------------|----------|------|
| Cat4/b2     | 1.090996 | 1.162448 | 1.163392 | 0.976581 | -4700.453007 | -4699.476426 | 1906.01i | 19.6 |
| Cat4/b3     | 1.120429 | 1.192513 | 1.193457 | 1.009213 | -4739.779081 | -4738.769868 | 1987.74i | 26.3 |
| Cat4/b4     | 1.099259 | 1.169952 | 1.170896 | 0.987366 | -4738.571028 | -4737.583662 | 1643.73i | 22.9 |
| Cat4/b5     | 1.074849 | 1.145639 | 1.146583 | 0.961170 | -4737.358593 | -4736.397423 | 1942.91i | 12.5 |
| Cat4/b6     | 1.129393 | 1.200876 | 1.201820 | 1.016889 | -4777.90873  | -4776.891841 | 1993.00i | 23.3 |
| Cat4/b7     | 1.145274 | 1.219225 | 1.220169 | 1.027828 | -4892.270748 | -4891.242920 | 2025.30i | 20.4 |
| Cat4/b8     | 1.122337 | 1.195566 | 1.196510 | 1.004615 | -4891.076112 | -4890.071497 | 1763.84i | 13.9 |
| Cat4/b9     | 1.235859 | 1.314698 | 1.315642 | 1.115436 | -5048.395574 | -5047.280138 | 1843.45i | 17.8 |
| Cat4/b10    | 1.203868 | 1.281797 | 1.282741 | 1.083904 | -5122.231497 | -5121.147593 | 1568.38i | 12.1 |
| Cat4/b11    | 1.152531 | 1.226136 | 1.227080 | 1.038199 | -4930.409370 | -4929.371171 | 1980.92i | 17.0 |
| Cat4/b12    | 1.128178 | 1.201520 | 1.202464 | 1.013776 | -4966.323168 | -4965.309392 | 2035.49i | 17.4 |
| Cat4/b13    | 1.146735 | 1.220032 | 1.220976 | 1.030447 | -4892.280339 | -4891.249892 | 1983.34i | 19.0 |
| Cat4/b14    | 1.226680 | 1.305072 | 1.306016 | 1.107396 | -5123.420104 | -5122.312708 | 2103.01i | 19.8 |
| Cat4/b15    | 1.341393 | 1.426699 | 1.427643 | 1.212722 | -5432.008482 | -5430.795760 | 2019.49i | 17.2 |
| [Cat4]K/b1  | 1.063916 | 1.135767 | 1.136711 | 0.948907 | -5261.016557 | -5260.067650 | 1916.06i | 18.4 |
| [Cat4]K/b2  | 1.092946 | 1.166341 | 1.167286 | 0.976338 | -5300.351573 | -5299.375235 | 1865.91i | 16.0 |
| [Cat4]K/b3  | 1.121218 | 1.195847 | 1.196791 | 1.004731 | -5339.679370 | -5338.674639 | 1964.07i | 19.0 |
| [Cat4]K/b4  | 1.100010 | 1.173263 | 1.174207 | 0.983298 | -5338.472212 | -5337.488914 | 1877.56i | 15.2 |
| [Cat4]K/b5  | 1.076640 | 1.149338 | 1.150282 | 0.961197 | -5337.256604 | -5336.295407 | 1417.94i | 9.4  |
| [Cat4]K/b6  | 1.130333 | 1.204307 | 1.205251 | 1.013564 | -5377.812333 | -5376.798769 | 1881.23i | 14.6 |
| [Cat4]K/b7  | 1.145855 | 1.222295 | 1.223239 | 1.025299 | -5492.172102 | -5491.146803 | 1891.33i | 13.7 |
| [Cat4]K/b8  | 1.123753 | 1.199331 | 1.200275 | 1.003173 | -5490.973123 | -5489.969950 | 1655.69i | 10.6 |
| [Cat4]K/b10 | 1.206649 | 1.285931 | 1.286875 | 1.087046 | -5722.128904 | -5721.041858 | 1553.79i | 11.3 |
| [Cat4]K/b11 | 1.154294 | 1.229832 | 1.230776 | 1.037833 | -5530.305737 | -5529.267904 | 1924.60i | 14.7 |
| [Cat4]K/b12 | 1.129848 | 1.205379 | 1.206323 | 1.012083 | -5566.223272 | -5565.211189 | 1907.32i | 11.9 |
| [Cat4]K/b13 | 1.148579 | 1.223902 | 1.224846 | 1.031350 | -5492.181191 | -5491.149841 | 1951.45i | 14.7 |
| [Cat4]K/b14 | 1.227273 | 1.308243 | 1.309187 | 1.104045 | -5723.319898 | -5722.215853 | 2172.40i | 13.5 |
| [Cat4]K/b15 | 1.342920 | 1.430406 | 1.431351 | 1.210998 | -6031.904429 | -6030.693431 | 2264.97i | 14.3 |

ZPVE = zero-point vibrational energy; TCE = thermal correction to energy; TCH = thermal correction to enthalpy; TCG = thermal correction to Gibbs free energy.



**Table S4. Electronic Energies and Free Energies (in Hartree) of the Structures Calculated at the (U)B3LYP-D3/def2-TZVP (SMD: DMSO)//(U)B3LYP-D3/6-31G(d)-LANL2DZ Level**

| Structures                 | ZPVE     | TCE      | TCH      | TCG      | E            | G(E+TCG)     | Imaginary<br>Frequenc<br>y | $\Delta G^\ddagger$<br>(kcal/mol) |
|----------------------------|----------|----------|----------|----------|--------------|--------------|----------------------------|-----------------------------------|
| Cat1/a1(quartet)           | 0.401841 | 0.429324 | 0.430269 | 0.341936 | -3059.736265 | -3059.394329 | 1923.95i                   | 20.6                              |
| Cat1/a2(quartet)           | 0.432252 | 0.460924 | 0.461868 | 0.371972 | -3099.071131 | -3098.699159 | 2081.61i                   | 19.8                              |
| Cat1/a2(sextet, $\sigma$ ) | 0.429522 | 0.459009 | 0.459953 | 0.367131 | -3099.061822 | -3098.694691 | 1336.88i                   | 22.6                              |
| Cat1/a2(sextet, $\pi$ )    | 0.428473 | 0.458004 | 0.458949 | 0.366180 | -3099.047086 | -3098.680906 | 19.7.05i                   | 31.2                              |
| Cat1/a3(quartet)           | 0.458969 | 0.489340 | 0.490285 | 0.396744 | -3138.401426 | -3138.004682 | 1960.37i                   | 18.9                              |
| Cat1/a4(quartet)           | 0.439848 | 0.468197 | 0.469141 | 0.379607 | -3137.193171 | -3136.813564 | 1873.33i                   | 18.2                              |
| Cat1/a5(quartet)           | 0.415146 | 0.443116 | 0.444060 | 0.354700 | -3135.968140 | -3135.613440 | 1923.87i                   | 17.1                              |
| Cat1/a6(quartet)           | 0.469756 | 0.499043 | 0.499987 | 0.408959 | -3176.531675 | -3176.122716 | 1877.75i                   | 17.9                              |
| Cat1/a7(quartet)           | 0.485203 | 0.516987 | 0.517931 | 0.419912 | -3290.891300 | -3290.471388 | 2117.01i                   | 19.0                              |
| Cat1/a8(quartet)           | 0.463069 | 0.493548 | 0.494492 | 0.400541 | -3289.690806 | -3289.290265 | 1992.94i                   | 17.1                              |
| Cat1/a9(quartet)           | 0.575963 | 0.611914 | 0.612858 | 0.509185 | -3447.016827 | -3446.507642 | 2000.66i                   | 15.5                              |
| Cat1/a10(quartet)          | 0.542814 | 0.578361 | 0.579305 | 0.474235 | -3520.844406 | -3520.370171 | 1983.71i                   | 13.2                              |
| Cat1/a11(quartet)          | 0.492878 | 0.524420 | 0.525364 | 0.429217 | -3329.028415 | -3328.599198 | 1702.39i                   | 13.9                              |
| Cat1/a12(quartet)          | 0.468906 | 0.500176 | 0.501120 | 0.405327 | -3364.948296 | -3364.542969 | 1454.77i                   | 12.0                              |
| Cat1/a13(quartet)          | 0.488023 | 0.518685 | 0.519630 | 0.425526 | -3290.909397 | -3290.483871 | 1729.13i                   | 16.3                              |
| Cat1/a14(quartet)          | 0.566672 | 0.603108 | 0.604052 | 0.495968 | -3522.036155 | -3521.540187 | 2071.25i                   | 17.3                              |
| Cat1/a15(quartet)          | 0.681563 | 0.724773 | 0.725717 | 0.601764 | -3830.626410 | -3830.024646 | 1864.01i                   | 14.0                              |

## REFERENCES

- [1] Bordwell, F. G. Equilibrium Acidities in Dimethyl Sulfoxide Solution. *Acc. Chem. Res.* **1988**, *21*, 456–463.
- [2] (a) Tissandier, M. D.; Cowen, K. A.; Feng, W. Y.; Gundlach, E.; Cohen, M. H.; Earhart, A. D.; Coe, J. V.; Tuttle, T. R. The Proton's Absolute Aqueous Enthalpy and Gibbs Free Energy of Solvation from Cluster-Ion Solvation Data. *J. Phys. Chem. A* **1998**, *102*, 7787–7794. (b) Kelly, C. P.; Cramer, C. J.; Truhlar, D. G. Aqueous Solvation Free Energies of Ions and Ion-Water Clusters Based on an Accurate Value for the Absolute Aqueous Solvation Free Energy of the Proton. *J. Phys. Chem. B* **2006**, *110*, 16066–16081.
- [3] Liptak, M. D.; Shields, G. C. Accurate  $pK_a$  Calculations for Carboxylic Acids Using Complete Basis Set and Gaussian-n Models Combined with CPCM Continuum Solvation Methods. *J. Am. Chem. Soc.* **2001**, *123*, 7314–7319.

## Cartesian coordinates of the structures

cat1/a1

|    |             |             |             |
|----|-------------|-------------|-------------|
| C  | 0.63441600  | -2.99035300 | -0.55417300 |
| C  | 1.28071600  | -4.20754200 | -0.12613000 |
| C  | 2.30451900  | -3.83642500 | 0.69114100  |
| C  | 2.28909200  | -2.39341500 | 0.74491300  |
| N  | 1.25317700  | -1.90051000 | -0.00556500 |
| H  | 0.97931600  | -5.20371800 | -0.42337100 |
| H  | 3.02394500  | -4.46427100 | 1.20093300  |
| C  | 2.94463500  | 1.86242500  | 0.94220400  |
| C  | 4.15333400  | 1.82841500  | 1.73576400  |
| C  | 4.39385300  | 0.52021300  | 2.01945300  |
| C  | 3.33803500  | -0.23925900 | 1.38538100  |
| N  | 2.47452200  | 0.59431500  | 0.73776100  |
| H  | 4.72235700  | 2.70066800  | 2.03060400  |
| H  | 5.20554700  | 0.09003800  | 2.59194400  |
| C  | -1.70788400 | 0.33200600  | -1.92638000 |
| C  | -2.65654200 | -0.41528400 | -2.71721200 |
| C  | -2.29020800 | -1.72518600 | -2.63212000 |
| C  | -1.12971000 | -1.77256800 | -1.77664600 |
| N  | -0.79329600 | -0.50872100 | -1.35596800 |
| H  | -3.47905500 | 0.02200100  | -3.26841500 |
| H  | -2.75018700 | -2.58787400 | -3.09665700 |
| C  | -0.72299300 | 2.49157200  | -1.21214200 |
| C  | -0.70044300 | 3.93746200  | -1.20520600 |
| C  | 0.45548800  | 4.30300300  | -0.58835800 |
| C  | 1.12434500  | 3.07877000  | -0.20699100 |
| N  | 0.39384000  | 1.99502900  | -0.59780700 |
| H  | -1.46902900 | 4.56881600  | -1.63206500 |
| H  | 0.83440200  | 5.29852900  | -0.39627200 |
| C  | -0.46824500 | -2.93400700 | -1.40196200 |
| C  | 2.32863000  | 3.02138600  | 0.48958800  |
| C  | 3.24003900  | -1.62734900 | 1.40914300  |
| C  | -1.70867600 | 1.72129900  | -1.81364300 |
| H  | 4.00415200  | -2.16553200 | 1.96251600  |
| H  | 2.80943000  | 3.96557400  | 0.72778400  |
| H  | -2.52747000 | 2.25166200  | -2.29080500 |
| H  | -0.84689200 | -3.87391900 | -1.79223600 |
| Fe | 0.80260100  | 0.03803000  | -0.26545300 |
| Cl | 2.09518000  | 0.05773900  | -2.22121300 |
| O  | -0.03077400 | 0.17897800  | 1.23323700  |

|   |             |             |             |
|---|-------------|-------------|-------------|
| H | -0.91658300 | -0.64314500 | 1.41383500  |
| C | -4.64767400 | 0.73139900  | 2.92573700  |
| C | -5.45348400 | 0.79687600  | 1.78301100  |
| C | -5.08026100 | 0.09651100  | 0.63114200  |
| C | -3.91256200 | -0.66017100 | 0.61901200  |
| C | -3.09257100 | -0.74296500 | 1.76418000  |
| C | -3.48156500 | -0.02705300 | 2.91652200  |
| H | -4.93281200 | 1.27392900  | 3.82320600  |
| H | -6.36426500 | 1.38957400  | 1.79132300  |
| H | -5.70184700 | 0.14223900  | -0.25953800 |
| H | -3.62420000 | -1.19941600 | -0.27751600 |
| H | -2.85292100 | -0.07141900 | 3.80244300  |
| C | -1.84141400 | -1.49562400 | 1.73532700  |
| H | -1.74303800 | -2.24439900 | 0.94902500  |
| H | -1.46527800 | -1.83711600 | 2.70150700  |

**cat1/a2**

|   |             |             |             |
|---|-------------|-------------|-------------|
| C | -0.21623400 | -2.59110000 | 1.47866900  |
| C | -0.56418200 | -3.98502200 | 1.36235400  |
| C | -1.50758700 | -4.07514400 | 0.38352300  |
| C | -1.75340600 | -2.73313200 | -0.08408900 |
| N | -0.94181800 | -1.84891900 | 0.58206700  |
| H | -0.13083300 | -4.77763100 | 1.95867000  |
| H | -2.01669900 | -4.95629100 | 0.01467400  |
| C | -3.15265300 | 1.07956900  | -1.48792300 |
| C | -4.21291300 | 0.58307800  | -2.33503600 |
| C | -4.15391600 | -0.77487400 | -2.28247700 |
| C | -3.07082100 | -1.10864700 | -1.38609300 |
| N | -2.48093700 | 0.03209800  | -0.91818800 |
| H | -4.89447800 | 1.20978200  | -2.89572100 |
| H | -4.78204500 | -1.49993100 | -2.78391200 |
| C | 1.34748800  | 1.37732100  | 1.93651900  |
| C | 2.34621900  | 1.06661900  | 2.92937100  |
| C | 2.21560400  | -0.25913300 | 3.21891400  |
| C | 1.15147500  | -0.76338400 | 2.38721600  |
| N | 0.64222300  | 0.24775200  | 1.61129800  |
| H | 3.03535400  | 1.78607400  | 3.35272600  |
| H | 2.78001500  | -0.85653300 | 3.92335600  |
| C | 0.06351900  | 3.00723800  | 0.60836100  |
| C | -0.23611800 | 4.35929300  | 0.19585800  |
| C | -1.37365300 | 4.29793000  | -0.54726900 |
| C | -1.75752000 | 2.90589000  | -0.60788500 |
| N | -0.87317300 | 2.14576600  | 0.10621600  |
| H | 0.35195600  | 5.22781000  | 0.46321400  |

|    |             |             |             |
|----|-------------|-------------|-------------|
| H  | -1.91339400 | 5.10452000  | -1.02659800 |
| C  | 0.74776200  | -2.09001100 | 2.34284000  |
| C  | -2.84031700 | 2.42123900  | -1.32782100 |
| C  | -2.71856900 | -2.40099700 | -1.02404400 |
| C  | 1.11434800  | 2.65346100  | 1.44053900  |
| H  | -3.28022300 | -3.21583100 | -1.46991500 |
| H  | -3.46306800 | 3.14535600  | -1.84343800 |
| H  | 1.77276500  | 3.44696400  | 1.77960900  |
| H  | 1.24197300  | -2.79062900 | 3.00808300  |
| Fe | -0.87926400 | 0.13428600  | 0.30812100  |
| Cl | -2.36396800 | 0.41201400  | 2.06671500  |
| O  | 0.09433000  | 0.05941500  | -1.04076800 |
| H  | 1.15565000  | -0.80787700 | -0.94355500 |
| C  | 4.83501100  | 0.12608100  | -2.94186300 |
| C  | 5.46422000  | 0.85289300  | -1.92554600 |
| C  | 4.98963500  | 0.76089100  | -0.61214500 |
| C  | 3.89875500  | -0.04980000 | -0.32024900 |
| C  | 3.25604100  | -0.79591500 | -1.33297800 |
| C  | 3.74091800  | -0.68477800 | -2.65147800 |
| H  | 5.19959600  | 0.19434600  | -3.96336900 |
| H  | 6.31568200  | 1.48749200  | -2.15598100 |
| H  | 5.47213400  | 1.32363100  | 0.18268700  |
| H  | 3.52815200  | -0.11480400 | 0.69879400  |
| H  | 3.25999000  | -1.24045300 | -3.45024700 |
| C  | 2.07512100  | -1.60785100 | -0.98252100 |
| C  | 1.59913400  | -2.70269900 | -1.92171400 |
| H  | 1.30681700  | -2.30130200 | -2.89795000 |
| H  | 0.72707400  | -3.20566800 | -1.49499900 |
| H  | 2.38541200  | -3.45213600 | -2.08663700 |
| H  | 2.09359700  | -1.92881300 | 0.06341900  |

**cat1/a3**

|   |             |             |             |
|---|-------------|-------------|-------------|
| C | -0.13085400 | -2.60526100 | -1.23003200 |
| C | -1.25747600 | -3.23612100 | -1.86780600 |
| C | -2.16952800 | -2.25557800 | -2.12131000 |
| C | -1.59677000 | -1.02024000 | -1.65465500 |
| N | -0.36326000 | -1.25510700 | -1.09444400 |
| H | -1.32339500 | -4.29425500 | -2.08650600 |
| H | -3.13955000 | -2.33892600 | -2.59393700 |
| C | -0.22593800 | 2.91583500  | -0.64562300 |
| C | -1.38171700 | 3.63937400  | -1.12183300 |
| C | -2.25477300 | 2.71314100  | -1.60290900 |
| C | -1.63165600 | 1.42422600  | -1.42367100 |
| N | -0.40176100 | 1.57132600  | -0.84456600 |

|    |             |             |             |
|----|-------------|-------------|-------------|
| H  | -1.48866200 | 4.71597700  | -1.08451800 |
| H  | -3.23384000 | 2.86390100  | -2.03830600 |
| C  | 3.45643000  | -1.19438700 | 0.65252700  |
| C  | 4.10890000  | -2.47514200 | 0.78781900  |
| C  | 3.26503900  | -3.40391000 | 0.26102500  |
| C  | 2.09617600  | -2.68982700 | -0.19329000 |
| N  | 2.23375700  | -1.35204200 | 0.05607500  |
| H  | 5.08784200  | -2.62102600 | 1.22620200  |
| H  | 3.40328100  | -4.47408800 | 0.17520400  |
| C  | 3.41667200  | 1.25157200  | 0.92410100  |
| C  | 4.01667500  | 2.49672800  | 1.34334200  |
| C  | 3.13835600  | 3.48401900  | 1.02073700  |
| C  | 1.99872200  | 2.84345100  | 0.40637100  |
| N  | 2.19174100  | 1.48949400  | 0.35934900  |
| H  | 4.98680400  | 2.58140800  | 1.81601800  |
| H  | 3.23372400  | 4.55153500  | 1.17271900  |
| C  | 0.99816000  | -3.28253700 | -0.79918300 |
| C  | 0.88149400  | 3.51540700  | -0.06542000 |
| C  | -2.20697800 | 0.21659100  | -1.78683900 |
| C  | 4.01181000  | 0.00825200  | 1.06441700  |
| Fe | 0.88425100  | 0.09985100  | -0.34037000 |
| Cl | 1.88813000  | 0.35483800  | -2.40538900 |
| O  | 0.32146200  | 0.06039600  | 1.23561300  |
| H  | -0.78638500 | -0.66923000 | 1.49094300  |
| C  | -5.10878500 | -0.41580200 | 0.44450700  |
| C  | -5.14543400 | 0.97752400  | 0.53075600  |
| C  | -4.06230200 | 1.66048300  | 1.09333300  |
| C  | -2.96707700 | 0.95490100  | 1.57991300  |
| C  | -2.92369800 | -0.45358300 | 1.52662700  |
| C  | -4.00632500 | -1.12269700 | 0.92563400  |
| H  | -5.94156200 | -0.95675900 | 0.00239500  |
| H  | -4.06174200 | 2.74580700  | 1.13298000  |
| C  | -1.74219400 | -1.17555500 | 2.08322400  |
| H  | -3.20209200 | 0.24136400  | -2.21666000 |
| H  | 1.02776400  | -4.35614800 | -0.95523900 |
| H  | 4.99473600  | -0.02695500 | 1.52345700  |
| H  | 0.87208300  | 4.59679800  | 0.02777000  |
| C  | -1.39411700 | -0.81474600 | 3.52936400  |
| H  | -0.42776700 | -1.24803600 | 3.80520700  |
| H  | -1.33639800 | 0.26549400  | 3.68372900  |
| H  | -2.16163100 | -1.21517100 | 4.20668200  |
| C  | -1.65154400 | -2.67128300 | 1.82820100  |
| H  | -1.87221500 | -2.93102400 | 0.79133800  |
| H  | -0.64133200 | -3.02786800 | 2.05544100  |

|   |             |             |            |
|---|-------------|-------------|------------|
| H | -2.35067000 | -3.21662700 | 2.47921400 |
| H | -3.99808300 | -2.20457900 | 0.85025200 |
| H | -2.10902800 | 1.49486900  | 1.96841100 |
| H | -6.00325800 | 1.52729400  | 0.15266300 |

**cat1/a4**

|    |             |             |             |
|----|-------------|-------------|-------------|
| C  | 0.92818400  | -0.49181600 | 2.59772000  |
| C  | 1.91970900  | 0.12038600  | 3.44634000  |
| C  | 2.03777300  | 1.41691300  | 3.04164700  |
| C  | 1.10164500  | 1.60373300  | 1.96065200  |
| N  | 0.44912900  | 0.42684500  | 1.69693400  |
| H  | 2.44775800  | -0.39060900 | 4.24121600  |
| H  | 2.67740400  | 2.19384900  | 3.44050800  |
| C  | -1.88866800 | 2.79656400  | -0.88151100 |
| C  | -1.55327200 | 4.20173900  | -0.92024800 |
| C  | -0.46190100 | 4.36677000  | -0.12503600 |
| C  | -0.14477900 | 3.06633300  | 0.41905200  |
| N  | -1.02354100 | 2.13243000  | -0.05678000 |
| H  | -2.08960300 | 4.94495100  | -1.49615800 |
| H  | 0.08246800  | 5.27552000  | 0.09748800  |
| C  | -1.72233600 | -2.77541400 | 0.11468100  |
| C  | -1.47435300 | -4.06137500 | 0.71979900  |
| C  | -0.62064400 | -3.84964200 | 1.75947600  |
| C  | -0.32436300 | -2.43843200 | 1.77417400  |
| N  | -0.99772300 | -1.80604200 | 0.76140300  |
| H  | -1.92407900 | -4.99021500 | 0.39310900  |
| H  | -0.21462900 | -4.56945600 | 2.45857700  |
| C  | -2.99718000 | -1.31764500 | -1.40960100 |
| C  | -4.02716600 | -1.10318000 | -2.40029800 |
| C  | -4.13841100 | 0.24288800  | -2.56343900 |
| C  | -3.16032200 | 0.85087800  | -1.69051900 |
| N  | -2.48882900 | -0.11848400 | -0.99582400 |
| H  | -4.58906700 | -1.89238300 | -2.88318900 |
| H  | -4.80449300 | 0.79268600  | -3.21592400 |
| C  | 0.55979500  | -1.82828100 | 2.65387900  |
| C  | -2.90842500 | 2.21279700  | -1.62050400 |
| C  | 0.86517600  | 2.82207700  | 1.33762200  |
| C  | -2.62260600 | -2.56128600 | -0.91942500 |
| H  | 1.47853400  | 3.66419400  | 1.64231500  |
| H  | -3.52254500 | 2.86776400  | -2.23039400 |
| H  | -3.11926600 | -3.43225400 | -1.33546300 |
| H  | 1.02058800  | -2.44733100 | 3.41688200  |
| Fe | -0.97979800 | 0.14851600  | 0.31861700  |
| Cl | -2.58873800 | 0.51141200  | 1.94916600  |

|   |            |             |             |
|---|------------|-------------|-------------|
| O | 0.07770400 | -0.01981700 | -0.95556900 |
| H | 1.19605300 | -0.77260200 | -0.64688900 |
| C | 2.08257900 | -2.44407100 | -1.75486800 |
| C | 2.79057500 | -1.66559500 | -2.89370100 |
| C | 2.16444700 | -1.49922400 | -0.55205700 |
| C | 3.33050700 | -0.64100900 | -0.79457700 |
| C | 4.00649300 | 0.20925600  | 0.09158800  |
| C | 5.08470700 | 0.95123800  | -0.38606000 |
| C | 5.47434600 | 0.85768900  | -1.73146800 |
| C | 4.78817300 | 0.02190300  | -2.62218700 |
| C | 3.71262800 | -0.72292400 | -2.15276600 |
| H | 3.69317000 | 0.27926500  | 1.12927000  |
| H | 6.31893300 | 1.44240400  | -2.08654100 |
| H | 5.09646400 | -0.04120200 | -3.66284100 |
| H | 5.63107800 | 1.60735100  | 0.28623200  |
| H | 3.31487600 | -2.31515800 | -3.60380500 |
| H | 1.05308600 | -2.72426700 | -1.99629000 |
| H | 2.03752000 | -1.92757000 | 0.44486600  |
| H | 2.05446300 | -1.08591600 | -3.46847900 |
| H | 2.63581200 | -3.36679100 | -1.53013400 |

**cat1/a5**

|   |             |             |             |
|---|-------------|-------------|-------------|
| C | 0.94376400  | -0.29895000 | 2.62456600  |
| C | 1.88716700  | 0.39921500  | 3.46188400  |
| C | 1.92824000  | 1.68694200  | 3.01696300  |
| C | 0.99653900  | 1.77766600  | 1.91914000  |
| N | 0.42056500  | 0.55686100  | 1.68861400  |
| H | 2.43808600  | -0.05265000 | 4.27660600  |
| H | 2.51443500  | 2.51440800  | 3.39559100  |
| C | -1.97443300 | 2.67982700  | -1.04992600 |
| C | -1.71467100 | 4.09832500  | -1.14466300 |
| C | -0.66092200 | 4.35879400  | -0.32496500 |
| C | -0.29148300 | 3.10275100  | 0.28619500  |
| N | -1.10209900 | 2.10015000  | -0.17224400 |
| H | -2.27176300 | 4.78416500  | -1.76982700 |
| H | -0.17399800 | 5.30517800  | -0.12796800 |
| C | -1.56525100 | -2.82596100 | 0.22410100  |
| C | -1.26626200 | -4.06755600 | 0.89432300  |
| C | -0.43318300 | -3.76554200 | 1.92879300  |
| C | -0.20282300 | -2.34338700 | 1.87534400  |
| N | -0.89143800 | -1.79250600 | 0.82575800  |
| H | -1.67053800 | -5.03099300 | 0.61156000  |
| H | -0.00131400 | -4.43043300 | 2.66565900  |
| C | -2.88515300 | -1.50405100 | -1.38590300 |



|    |             |             |             |
|----|-------------|-------------|-------------|
| C  | -3.90586500 | -1.38868500 | -2.40233700 |
| C  | -4.06909000 | -0.05961600 | -2.64150000 |
| C  | -3.13329200 | 0.63459500  | -1.78670800 |
| N  | -2.43409500 | -0.26502500 | -1.02869900 |
| H  | -4.42487800 | -2.22620200 | -2.85043400 |
| H  | -4.74477300 | 0.42551000  | -3.33407900 |
| C  | 0.64435500  | -1.65014300 | 2.73094200  |
| C  | -2.94361700 | 2.00852800  | -1.78392500 |
| C  | 0.70248600  | 2.95514000  | 1.24171000  |
| C  | -2.46357600 | -2.70331700 | -0.82664600 |
| H  | 1.25833900  | 3.84337600  | 1.52523600  |
| H  | -3.57265200 | 2.60131900  | -2.44055100 |
| H  | -2.91638500 | -3.61543500 | -1.20278300 |
| H  | 1.12945700  | -2.21235600 | 3.52242500  |
| Fe | -0.96169200 | 0.13907300  | 0.29188500  |
| Cl | -2.61837300 | 0.48879600  | 1.88633300  |
| O  | 0.15127700  | -0.02484400 | -0.93949900 |
| H  | 1.16694300  | -0.83496200 | -0.71856300 |
| C  | 2.21777600  | -2.48200300 | -1.65102700 |
| C  | 3.16351500  | -2.10318900 | -2.56601200 |
| C  | 2.20416000  | -1.54196800 | -0.53142100 |
| C  | 3.32908400  | -0.61051300 | -0.79361400 |
| C  | 3.81710800  | 0.46286500  | -0.06395000 |
| C  | 4.87692500  | 1.21773200  | -0.60244900 |
| C  | 5.41599900  | 0.90356200  | -1.85077400 |
| C  | 4.91889200  | -0.17967100 | -2.59490000 |
| C  | 3.87695000  | -0.93689100 | -2.06167100 |
| H  | 3.39149600  | 0.71831000  | 0.90178300  |
| H  | 6.23004800  | 1.50088400  | -2.25235200 |
| H  | 5.34733400  | -0.42408600 | -3.56374200 |
| H  | 5.27518600  | 2.05781900  | -0.03977600 |
| H  | 3.36484200  | -2.58660900 | -3.51615700 |
| H  | 1.52945100  | -3.31329200 | -1.74855300 |
| H  | 2.00625600  | -1.89398300 | 0.48178900  |

**cat1/a6**

|   |             |             |             |
|---|-------------|-------------|-------------|
| C | -0.47138200 | 3.15753900  | -0.19037400 |
| C | -0.84700100 | 4.27824000  | -1.02166900 |
| C | -1.86042700 | 3.84918400  | -1.82114600 |
| C | -2.08867600 | 2.45965500  | -1.49539500 |
| N | -1.23882400 | 2.06794900  | -0.49831900 |
| H | -0.39187200 | 5.25912100  | -0.97293400 |
| H | -2.40796000 | 4.40097500  | -2.57438200 |
| C | -2.84370100 | -1.75530400 | -1.16526800 |

|    |             |             |             |
|----|-------------|-------------|-------------|
| C  | -3.81231300 | -1.85086400 | -2.23338900 |
| C  | -4.00938000 | -0.58683100 | -2.69612900 |
| C  | -3.14449400 | 0.27827000  | -1.92681600 |
| N  | -2.45533900 | -0.45538900 | -0.99972000 |
| H  | -4.27844700 | -2.77167800 | -2.55979600 |
| H  | -4.66485400 | -0.25101000 | -3.48937600 |
| C  | 0.72623100  | 0.25420500  | 2.75889100  |
| C  | 1.61365900  | 1.11706800  | 3.49850000  |
| C  | 1.65625000  | 2.30381200  | 2.82905500  |
| C  | 0.77650700  | 2.17398900  | 1.69343900  |
| N  | 0.23391900  | 0.91579000  | 1.66215000  |
| H  | 2.13078600  | 0.83352000  | 4.40621200  |
| H  | 2.20966200  | 3.20033600  | 3.07749400  |
| C  | -0.31543300 | -1.92685600 | 2.31740300  |
| C  | -0.50235700 | -3.32873500 | 2.59691700  |
| C  | -1.27137800 | -3.83130900 | 1.59122200  |
| C  | -1.57595200 | -2.73119000 | 0.70936100  |
| N  | -0.96863400 | -1.58636900 | 1.16060300  |
| H  | -0.08722600 | -3.84469500 | 3.45312100  |
| H  | -1.62748400 | -4.84428400 | 1.45432800  |
| C  | 0.48723600  | 3.20646900  | 0.81054800  |
| C  | -2.41590600 | -2.82529300 | -0.39166300 |
| C  | -3.00229600 | 1.64089200  | -2.14421000 |
| C  | 0.46010800  | -1.06818600 | 3.08435700  |
| H  | -3.61758700 | 2.09154400  | -2.91647800 |
| H  | -2.81621400 | -3.80577300 | -0.62978300 |
| H  | 0.91861100  | -1.46889400 | 3.98266000  |
| H  | 1.01160900  | 4.14580600  | 0.95503600  |
| Fe | -1.06862900 | 0.22146500  | 0.30303300  |
| Cl | -2.81343800 | 0.78339400  | 1.72691000  |
| O  | 0.09436900  | -0.10158200 | -0.84022100 |
| H  | 1.22469200  | -0.74628000 | -0.33277600 |
| C  | 4.79762600  | 1.33056800  | -0.17042200 |
| C  | 3.77033600  | 0.50405500  | 0.26297500  |
| C  | 4.97078900  | 0.02287300  | -2.20135700 |
| C  | 5.40213500  | 1.08990200  | -1.41110800 |
| H  | 5.12649500  | 2.16178100  | 0.44737900  |
| H  | 3.28552200  | 0.68938400  | 1.21764300  |
| H  | 6.20220000  | 1.73558600  | -1.76345200 |
| C  | 3.93923300  | -0.82083100 | -1.78104600 |
| C  | 3.33204200  | -0.58338600 | -0.52294500 |
| H  | 5.44177800  | -0.15743400 | -3.16546200 |
| C  | 2.10318100  | -2.51112600 | -2.29602900 |
| C  | 1.97089400  | -2.72470800 | -0.78361600 |

|   |            |             |             |
|---|------------|-------------|-------------|
| C | 2.20142900 | -1.40707900 | -0.05964600 |
| C | 3.50817500 | -1.99541000 | -2.63895800 |
| H | 1.90454000 | -3.44159600 | -2.84070200 |
| H | 0.98136200 | -3.11596200 | -0.52555500 |
| H | 4.23236800 | -2.81344500 | -2.49685500 |
| H | 3.57055700 | -1.71861500 | -3.69882300 |
| H | 2.12085000 | -1.46732300 | 1.02994600  |
| H | 1.34844200 | -1.77890400 | -2.61011300 |
| H | 2.71135700 | -3.46681400 | -0.44378900 |

**cat1/a7**

|   |             |             |             |
|---|-------------|-------------|-------------|
| C | -1.11081800 | -2.59975300 | 0.74962700  |
| C | -1.69453500 | -3.78254900 | 0.16398900  |
| C | -0.97016100 | -4.06159600 | -0.95358900 |
| C | 0.05652200  | -3.05018800 | -1.04671000 |
| N | -0.05047300 | -2.17338000 | -0.00187500 |
| H | -2.55123500 | -4.30661600 | 0.56648900  |
| H | -1.09976300 | -4.87164500 | -1.65981000 |
| C | 3.35782900  | -0.37532100 | -1.71028800 |
| C | 3.87118100  | -1.01278900 | -2.90120600 |
| C | 3.04427000  | -2.05744100 | -3.17347300 |
| C | 2.03032300  | -2.06389700 | -2.14396800 |
| N | 2.24158600  | -1.03184000 | -1.26959300 |
| H | 4.74960300  | -0.68506300 | -3.44219400 |
| H | 3.10069600  | -2.77276000 | -3.98395300 |
| C | 0.16846700  | 0.97953400  | 2.77480200  |
| C | -0.82585500 | 0.95388700  | 3.81632600  |
| C | -1.57682600 | -0.16671100 | 3.61774800  |
| C | -1.05019100 | -0.82103800 | 2.44830800  |
| N | 0.00339000  | -0.10333100 | 1.94068500  |
| H | -0.91310100 | 1.69588100  | 4.59966000  |
| H | -2.41197600 | -0.53320800 | 4.20075600  |
| C | 2.15031800  | 1.96233000  | 1.69232600  |
| C | 3.19218800  | 2.95858500  | 1.60619600  |
| C | 3.98228400  | 2.60505400  | 0.55619800  |
| C | 3.41522400  | 1.40065400  | -0.00408600 |
| N | 2.30671400  | 1.02798200  | 0.70737800  |
| H | 3.29318700  | 3.80301600  | 2.27592100  |
| H | 4.86706200  | 3.10069800  | 0.17784800  |
| C | -1.57753900 | -1.98159300 | 1.89866200  |
| C | 3.91832500  | 0.74785600  | -1.11981500 |
| C | 1.01311400  | -3.00124800 | -2.05190300 |
| C | 1.14738400  | 1.95360700  | 2.65302700  |
| H | 0.97288700  | -3.77097500 | -2.81625700 |

|    |             |             |             |
|----|-------------|-------------|-------------|
| H  | 4.81062200  | 1.16093900  | -1.57972100 |
| H  | 1.14569500  | 2.75645700  | 3.38361900  |
| H  | -2.43330200 | -2.42581700 | 2.39496800  |
| Fe | 1.09161700  | -0.54257400 | 0.32572000  |
| Cl | 2.50512900  | -1.85705900 | 1.61655500  |
| O  | 0.18316000  | 0.38367300  | -0.72156300 |
| H  | -0.95341000 | 0.87622000  | -0.20469500 |
| C  | -2.66337900 | 3.96087100  | -2.71616000 |
| C  | -1.71934200 | 4.93245800  | -2.37451000 |
| C  | -0.90800500 | 4.74417100  | -1.24884100 |
| C  | -1.04454000 | 3.59751300  | -0.47585900 |
| C  | -1.99405100 | 2.60845400  | -0.80957100 |
| C  | -2.79745700 | 2.80629800  | -1.94609100 |
| H  | -3.30147200 | 4.10443300  | -3.58419600 |
| H  | -1.61563900 | 5.82986100  | -2.97835900 |
| H  | -0.16801800 | 5.49301200  | -0.97926700 |
| H  | -0.40268300 | 3.43891200  | 0.38773600  |
| H  | -3.53993800 | 2.06103700  | -2.21212300 |
| C  | -2.05927300 | 1.39337700  | 0.04400600  |
| H  | -1.98465700 | 1.63942900  | 1.10644200  |
| C  | -3.02514200 | 0.30143400  | -0.22760300 |
| C  | -2.95877600 | -0.42917800 | -1.43003100 |
| C  | -3.97445200 | -0.07876300 | 0.73680700  |
| C  | -3.83040900 | -1.48694400 | -1.66680600 |
| H  | -2.18470700 | -0.18043500 | -2.14985600 |
| C  | -4.85892600 | -1.13004500 | 0.49256400  |
| H  | -4.01483600 | 0.46086900  | 1.67916000  |
| C  | -4.78972000 | -1.83736500 | -0.70914800 |
| H  | -3.75249100 | -2.05332300 | -2.59057500 |
| H  | -5.59501900 | -1.40227900 | 1.24460300  |
| H  | -5.46872500 | -2.66509100 | -0.89556800 |

**cat1/a8**

|   |             |            |             |
|---|-------------|------------|-------------|
| C | -0.14043200 | 1.23013500 | 2.71201900  |
| C | 0.18343400  | 2.50400900 | 3.30354200  |
| C | -0.17676800 | 3.45896300 | 2.40036900  |
| C | -0.73485700 | 2.76767000 | 1.26374900  |
| N | -0.68831200 | 1.41274000 | 1.46767200  |
| H | 0.62822400  | 2.63209100 | 4.28190900  |
| H | -0.09718000 | 4.53503800 | 2.48665100  |
| C | -2.87016900 | 1.23171500 | -2.13477400 |
| C | -3.17874100 | 2.50388600 | -2.74750300 |
| C | -2.59331000 | 3.46071500 | -1.97843900 |
| C | -1.94399800 | 2.77324200 | -0.88561700 |

|    |             |             |             |
|----|-------------|-------------|-------------|
| N  | -2.12584000 | 1.42346300  | -1.00383200 |
| H  | -3.76027400 | 2.62454100  | -3.65238700 |
| H  | -2.59821900 | 4.53468400  | -2.11305900 |
| C  | -0.73473100 | -2.76794900 | 1.26322100  |
| C  | -0.17662300 | -3.45943600 | 2.39971400  |
| C  | 0.18355000  | -2.50463800 | 3.30306300  |
| C  | -0.14036100 | -1.23066400 | 2.71177900  |
| N  | -0.68823400 | -1.41305900 | 1.46739500  |
| H  | -0.09699700 | -4.53552300 | 2.48579600  |
| H  | 0.62834500  | -2.63288500 | 4.28140700  |
| C  | -1.94386600 | -2.77317100 | -0.88615100 |
| C  | -2.59314500 | -3.46046500 | -1.97910400 |
| C  | -3.17861900 | -2.50351500 | -2.74798600 |
| C  | -2.87010700 | -1.23144700 | -2.13501200 |
| N  | -2.12577000 | -1.42337500 | -1.00411100 |
| H  | -2.59800700 | -4.53440800 | -2.11393000 |
| H  | -3.76014600 | -2.62402400 | -3.65289400 |
| C  | 0.10808900  | -0.00031700 | 3.30597900  |
| C  | -3.24376100 | 0.00017700  | -2.65377500 |
| C  | -1.27913300 | 3.40407800  | 0.15591700  |
| C  | -1.27897900 | -3.40417200 | 0.15526500  |
| H  | -1.22528200 | 4.48792900  | 0.12940100  |
| H  | -3.84023100 | 0.00025000  | -3.56066200 |
| H  | -1.22508600 | -4.48801700 | 0.12854800  |
| H  | 0.54660900  | -0.00040100 | 4.29875800  |
| Fe | -1.35847100 | -0.00005500 | 0.20950200  |
| Cl | -3.38876500 | -0.00023400 | 1.34062800  |
| O  | 0.01483000  | 0.00007000  | -0.73515900 |
| H  | 1.16984000  | 0.00007100  | -0.08920000 |
| C  | 4.54475500  | -3.02657000 | -1.48387900 |
| C  | 3.57940300  | -3.45844900 | -0.56657500 |
| C  | 2.79646700  | -2.53327700 | 0.13308900  |
| C  | 3.00518800  | -1.17302700 | -0.09275700 |
| C  | 3.98543400  | -0.73442600 | -1.02067700 |
| C  | 4.75590000  | -1.65971200 | -1.71728700 |
| H  | 5.14071600  | -3.75935600 | -2.02135800 |
| H  | 2.04118300  | -2.86408200 | 0.83973600  |
| H  | 5.51370600  | -1.33475700 | -2.42563000 |
| C  | 2.29951300  | 0.00012300  | 0.46169100  |
| C  | 3.00507300  | 1.17331700  | -0.09281100 |
| C  | 2.79620700  | 2.53355800  | 0.13295600  |
| C  | 3.57904300  | 3.45877300  | -0.56676200 |
| C  | 4.54443800  | 3.02694500  | -1.48404400 |
| C  | 4.75572600  | 1.66009500  | -1.71737700 |

|   |            |             |             |
|---|------------|-------------|-------------|
| C | 3.98536000 | 0.73476800  | -1.02071300 |
| H | 2.04088400 | 2.86432300  | 0.83958000  |
| H | 5.14032100 | 3.75976300  | -2.02156700 |
| H | 5.51356200 | 1.33518200  | -2.42570700 |
| H | 3.43503100 | -4.52238300 | -0.39925200 |
| H | 3.43455900 | 4.52270200  | -0.39950200 |
| H | 1.99627900 | 0.00012800  | 1.51037400  |

**cat1/a9**

|   |             |             |             |
|---|-------------|-------------|-------------|
| C | -0.66435700 | 1.02874100  | -1.98853300 |
| C | -1.05014100 | 2.12121700  | -2.84733900 |
| C | -0.00254200 | 2.99257100  | -2.85996400 |
| C | 1.02077700  | 2.42102100  | -2.01774900 |
| N | 0.58942800  | 1.23010200  | -1.49100000 |
| H | -1.99945800 | 2.19527200  | -3.36192100 |
| H | 0.09094800  | 3.92978500  | -3.39344900 |
| C | 4.45371900  | 1.08652100  | 0.21205700  |
| C | 5.33079000  | 2.18826300  | -0.11409600 |
| C | 4.61295400  | 3.03449500  | -0.90169900 |
| C | 3.30482600  | 2.43954900  | -1.05885000 |
| N | 3.23308800  | 1.25821200  | -0.37791000 |
| H | 6.35367300  | 2.28465800  | 0.22658300  |
| H | 4.92274200  | 3.97117400  | -1.34707500 |
| C | -0.05793300 | -2.34832600 | 0.60382500  |
| C | -1.31891600 | -3.00513200 | 0.35181300  |
| C | -1.98828500 | -2.23208400 | -0.54475700 |
| C | -1.13884900 | -1.10044100 | -0.82909800 |
| N | 0.02951000  | -1.18472900 | -0.11428400 |
| H | -1.62981300 | -3.93191000 | 0.81464600  |
| H | -2.96961900 | -2.38417200 | -0.97315900 |
| C | 2.20343700  | -2.31128600 | 1.60875300  |
| C | 3.23248700  | -2.88582600 | 2.44176400  |
| C | 4.32774000  | -2.08652000 | 2.31026100  |
| C | 3.95688800  | -1.02329300 | 1.40643000  |
| N | 2.66080400  | -1.18257400 | 0.99408500  |
| H | 3.11707000  | -3.78533800 | 3.03260900  |
| H | 5.30066500  | -2.19084800 | 2.77313200  |
| C | -1.47256500 | -0.06643000 | -1.69086700 |
| C | 4.79680600  | 0.01933600  | 1.03405200  |
| C | 2.27162100  | 2.98869900  | -1.81116400 |
| C | 0.93122600  | -2.85120100 | 1.43910100  |
| H | 2.46839100  | 3.93790700  | -2.30120000 |
| H | 5.80484000  | 0.00972600  | 1.43828000  |
| H | 0.70047300  | -3.75997600 | 1.98437000  |

|                 |             |             |             |
|-----------------|-------------|-------------|-------------|
| H               | -2.44967500 | -0.10665900 | -2.15967700 |
| Fe              | 1.60396900  | 0.04877400  | -0.21190300 |
| Cl              | 2.42313900  | -1.14410400 | -2.04630100 |
| O               | 1.20702000  | 1.03845300  | 1.13289600  |
| H               | 0.09870100  | 0.92811300  | 1.64584100  |
| C               | -4.64401300 | 0.55042900  | 0.34065400  |
| C               | -3.85265900 | 1.64532800  | -0.01922800 |
| C               | -2.61992000 | 1.87854400  | 0.60520500  |
| C               | -2.18348300 | 1.01418700  | 1.61199900  |
| C               | -2.97068100 | -0.12218400 | 1.93286200  |
| C               | -4.19709400 | -0.34986100 | 1.31351600  |
| H               | -5.59986700 | 0.38714400  | -0.15001600 |
| H               | -4.18762500 | 2.32112600  | -0.80168100 |
| H               | -2.00149500 | 2.70244900  | 0.27177200  |
| H               | -4.79411800 | -1.21985000 | 1.57487900  |
| C               | -0.93880600 | 1.01706400  | 2.44198300  |
| C               | -0.99695900 | -0.29403100 | 3.16310900  |
| C               | -0.03529600 | -0.95975900 | 3.92624300  |
| C               | -0.34119600 | -2.20971700 | 4.48110200  |
| C               | -1.58717100 | -2.80641000 | 4.26388500  |
| C               | -2.53601000 | -2.17683300 | 3.45152700  |
| C               | -2.23150900 | -0.93665600 | 2.89449900  |
| H               | 0.95401500  | -0.54062300 | 4.06056200  |
| H               | 0.40803900  | -2.72394800 | 5.07714200  |
| H               | -1.81020700 | -3.77337400 | 4.70702100  |
| H               | -3.49040400 | -2.65496400 | 3.24626400  |
| C               | -0.58885900 | 2.31012400  | 3.24721000  |
| C               | -1.74899100 | 2.59769900  | 4.22850600  |
| H               | -1.52446400 | 3.49349800  | 4.82066000  |
| H               | -2.68862200 | 2.76846300  | 3.69242500  |
| H               | -1.89644700 | 1.76002400  | 4.91931200  |
| C               | -0.40858900 | 3.52142200  | 2.30750300  |
| H               | 0.30046900  | 3.29200300  | 1.50604800  |
| H               | -1.35703400 | 3.83877800  | 1.86635500  |
| H               | -0.02114700 | 4.37319500  | 2.87865300  |
| C               | 0.71338500  | 2.13754900  | 4.05571100  |
| H               | 0.98924800  | 3.09677600  | 4.50915700  |
| H               | 0.59052800  | 1.42017700  | 4.87184400  |
| H               | 1.53453500  | 1.81159500  | 3.41077100  |
| <b>cat1/a10</b> |             |             |             |
| C               | 1.05511500  | 3.14504100  | 0.47320100  |
| C               | 1.63180400  | 4.13140200  | 1.35645500  |
| C               | 2.80183000  | 3.60529600  | 1.81304500  |

|    |             |             |             |
|----|-------------|-------------|-------------|
| C  | 2.92006300  | 2.29043300  | 1.22594200  |
| N  | 1.85403800  | 2.03815500  | 0.41048500  |
| H  | 1.19337300  | 5.09697200  | 1.57304100  |
| H  | 3.52242700  | 4.04523500  | 2.49038000  |
| C  | 3.48605300  | -1.82034200 | 0.11741100  |
| C  | 4.68881500  | -2.06098600 | 0.88230900  |
| C  | 5.02349400  | -0.87547600 | 1.46096800  |
| C  | 4.01221000  | 0.07689700  | 1.06273800  |
| N  | 3.09666600  | -0.51938400 | 0.23887400  |
| H  | 5.19988400  | -3.01302700 | 0.94616200  |
| H  | 5.86231200  | -0.65078800 | 2.10702100  |
| C  | -0.88064000 | 0.69450700  | -2.49921500 |
| C  | -1.86691200 | 1.66420600  | -2.91117700 |
| C  | -1.71838600 | 2.74155500  | -2.09409600 |
| C  | -0.62352900 | 2.43741500  | -1.20239900 |
| N  | -0.13103300 | 1.18909500  | -1.45959900 |
| H  | -2.58554800 | 1.50789600  | -3.70412200 |
| H  | -2.28220500 | 3.66443500  | -2.07907300 |
| C  | 0.15256000  | -1.54527000 | -2.59823000 |
| C  | 0.19724200  | -2.90251300 | -3.08327000 |
| C  | 1.18003900  | -3.53384200 | -2.38144000 |
| C  | 1.74599400  | -2.55174500 | -1.48769300 |
| N  | 1.09085900  | -1.35239800 | -1.62950400 |
| H  | -0.45094100 | -3.30349500 | -3.85141100 |
| H  | 1.51725000  | -4.55912300 | -2.46376600 |
| C  | -0.11579600 | 3.32210800  | -0.25428700 |
| C  | 2.83918400  | -2.77682800 | -0.66257300 |
| C  | 3.94592800  | 1.39167100  | 1.50485300  |
| C  | -0.75385000 | -0.57738300 | -3.03246400 |
| H  | 4.73742100  | 1.73385900  | 2.16505100  |
| H  | 3.25742600  | -3.77924700 | -0.66129600 |
| H  | -1.44457700 | -0.85923400 | -3.81959800 |
| H  | -0.65289900 | 4.25438400  | -0.11408300 |
| Fe | 1.44421600  | 0.32519900  | -0.57975400 |
| Cl | 2.81642500  | 1.08355000  | -2.31953400 |
| O  | 0.60882900  | -0.23597500 | 0.78663900  |
| H  | -0.63024800 | -0.39335800 | 0.73285700  |
| C  | -3.52814000 | 3.26962500  | 1.39452000  |
| C  | -2.54464700 | 2.92988400  | 2.33296100  |
| C  | -1.95735000 | 1.65884800  | 2.32501400  |
| C  | -2.37351200 | 0.73250700  | 1.37023400  |
| C  | -3.34521600 | 1.08576600  | 0.40366600  |
| C  | -3.93044600 | 2.35103700  | 0.41891000  |
| H  | -3.97720500 | 4.25913300  | 1.41992100  |



|   |             |             |             |
|---|-------------|-------------|-------------|
| H | -2.23319200 | 3.66040900  | 3.07478300  |
| H | -1.18373800 | 1.39516400  | 3.04001900  |
| H | -4.68126500 | 2.62280400  | -0.31863500 |
| C | -1.85826000 | -0.63536600 | 1.09577400  |
| C | -2.63179700 | -1.08047700 | -0.09937500 |
| C | -2.59004600 | -2.28190700 | -0.80341300 |
| C | -3.43145300 | -2.45073100 | -1.91015000 |
| C | -4.30844100 | -1.43357800 | -2.30543100 |
| C | -4.35638900 | -0.22472000 | -1.60227800 |
| C | -3.51788100 | -0.04948000 | -0.50307100 |
| H | -1.91237300 | -3.07442400 | -0.50228400 |
| H | -3.40340600 | -3.38467700 | -2.46517100 |
| H | -4.95912800 | -1.58515600 | -3.16266100 |
| H | -5.04024500 | 0.56352100  | -1.90661800 |
| C | -1.61828000 | -1.61552600 | 2.20375900  |
| C | -0.69871600 | -2.66465300 | 2.03044800  |
| C | -2.32124300 | -1.52944600 | 3.41505800  |
| C | -0.50623600 | -3.61199900 | 3.03378000  |
| H | -0.10868100 | -2.70651800 | 1.12031900  |
| C | -2.12510300 | -2.47785100 | 4.41994200  |
| H | -3.03188500 | -0.72143600 | 3.56037000  |
| C | -1.21976500 | -3.52406400 | 4.23258400  |
| H | 0.21295700  | -4.41355900 | 2.88556400  |
| H | -2.68333500 | -2.39916800 | 5.34938100  |
| H | -1.06512100 | -4.26069400 | 5.01656900  |

**cat1/a11**

|   |             |             |             |
|---|-------------|-------------|-------------|
| C | -0.70226200 | -2.76572000 | 1.27130300  |
| C | -0.13825700 | -3.45901000 | 2.40355500  |
| C | 0.22010500  | -2.50573100 | 3.30922900  |
| C | -0.10345500 | -1.23045800 | 2.71818300  |
| N | -0.65904600 | -1.41233300 | 1.47740100  |
| H | -0.05415400 | -4.53500200 | 2.48547500  |
| H | 0.66500500  | -2.63510600 | 4.28752900  |
| C | -0.70205700 | 2.76567200  | 1.27146900  |
| C | -0.13799800 | 3.45884900  | 2.40376300  |
| C | 0.22030400  | 2.50548600  | 3.30937200  |
| C | -0.10335500 | 1.23027400  | 2.71825100  |
| N | -0.65893400 | 1.41226700  | 1.47747900  |
| H | -0.05381800 | 4.53483000  | 2.48575200  |
| H | 0.66521600  | 2.63476700  | 4.28767900  |
| C | -2.96647000 | -1.23240900 | -2.04454300 |
| C | -3.28740300 | -2.50449000 | -2.65188800 |
| C | -2.66023300 | -3.45955300 | -1.91384700 |

|    |             |             |             |
|----|-------------|-------------|-------------|
| C  | -1.97503400 | -2.77166700 | -0.84289800 |
| N  | -2.17655300 | -1.42336500 | -0.94538200 |
| H  | -3.90469900 | -2.62651000 | -3.53262400 |
| H  | -2.66003100 | -4.53273700 | -2.05493100 |
| C  | -2.96638300 | 1.23273000  | -2.04446500 |
| C  | -3.28723800 | 2.50487200  | -2.65172200 |
| C  | -2.66000000 | 3.45984500  | -1.91362300 |
| C  | -1.97483800 | 2.77184200  | -0.84272500 |
| N  | -2.17644500 | 1.42356100  | -0.94529600 |
| H  | -3.90453300 | 2.62699100  | -3.53244500 |
| H  | -2.65972800 | 4.53303800  | -2.05463600 |
| C  | -1.26769800 | -3.40061900 | 0.17194700  |
| C  | -1.26745300 | 3.40068100  | 0.17215800  |
| C  | 0.14892700  | -0.00011900 | 3.31013100  |
| C  | -3.36403700 | 0.00019000  | -2.54484400 |
| H  | 0.59178200  | -0.00016400 | 4.30113600  |
| H  | -1.20361800 | 4.48379000  | 0.13781700  |
| H  | -3.99663600 | 0.00024100  | -3.42704200 |
| H  | -1.20393600 | -4.48373000 | 0.13753700  |
| Fe | -1.36697400 | 0.00003300  | 0.23716200  |
| Cl | -3.36568700 | 0.00007600  | 1.44338300  |
| O  | -0.04020700 | -0.00001900 | -0.75711300 |
| H  | 1.20013700  | 0.00001100  | -0.10570500 |
| C  | 4.01061200  | -3.63560600 | -1.17562800 |
| C  | 4.08735100  | -2.45687600 | -1.92108200 |
| C  | 2.84000900  | -2.44971600 | 0.57138400  |
| C  | 3.38013200  | -3.63112500 | 0.07345500  |
| H  | 4.44088300  | -4.55325200 | -1.56775100 |
| H  | 4.57486600  | -2.46198700 | -2.89355200 |
| H  | 3.31402800  | -4.54575600 | 0.65663400  |
| C  | 2.33065000  | -0.00002200 | 0.33822500  |
| C  | 2.92285700  | -1.25826500 | -0.16787100 |
| C  | 3.54027200  | -1.26796200 | -1.43575200 |
| C  | 3.54424500  | -0.00009400 | -2.26081100 |
| H  | 2.14266300  | -0.00000800 | 1.41598000  |
| H  | 4.38539200  | -0.00013700 | -2.96459400 |
| H  | 2.63142600  | -0.00005800 | -2.88068700 |
| H  | 2.34611700  | -2.43985000 | 1.53839000  |
| C  | 2.92296500  | 1.25816100  | -0.16788900 |
| C  | 2.84022100  | 2.44963000  | 0.57135000  |
| C  | 3.38045600  | 3.63098300  | 0.07340900  |
| C  | 4.01094000  | 3.63539000  | -1.17567200 |
| C  | 4.08757200  | 2.45664500  | -1.92111100 |
| C  | 3.54038500  | 1.26778600  | -1.43576900 |

|   |            |            |             |
|---|------------|------------|-------------|
| H | 2.34632500 | 2.43981900 | 1.53835500  |
| H | 3.31443500 | 4.54562700 | 0.65657700  |
| H | 4.44129700 | 4.55299200 | -1.56780500 |
| H | 4.57508900 | 2.46170000 | -2.89358100 |

**cat1/a12**

|    |             |             |             |
|----|-------------|-------------|-------------|
| C  | -2.06010300 | 2.77664400  | -0.85912900 |
| C  | -2.70955100 | 3.46317600  | -1.95319200 |
| C  | -3.24685200 | 2.50245500  | -2.75134500 |
| C  | -2.91585900 | 1.22986700  | -2.14996900 |
| N  | -2.19909500 | 1.42413200  | -1.00230800 |
| H  | -2.74524200 | 4.53876400  | -2.06952800 |
| H  | -3.81425600 | 2.62050200  | -3.66556800 |
| C  | -2.05458200 | -2.77968900 | -0.85972800 |
| C  | -2.70263600 | -3.46727200 | -1.95395600 |
| C  | -3.24180100 | -2.50744100 | -2.75192400 |
| C  | -2.91334800 | -1.23433200 | -2.15026000 |
| N  | -2.19622200 | -1.42742500 | -1.00262900 |
| H  | -2.73620900 | -4.54290300 | -2.07051500 |
| H  | -3.80894400 | -2.62641200 | -3.66619000 |
| C  | -0.16346300 | 1.23143700  | 2.69044200  |
| C  | 0.12447800  | 2.50522300  | 3.30305800  |
| C  | -0.29841400 | 3.46345100  | 2.43062600  |
| C  | -0.84996200 | 2.77324100  | 1.29000600  |
| N  | -0.74751200 | 1.41784500  | 1.46386600  |
| H  | 0.58382900  | 2.63045100  | 4.27520200  |
| H  | -0.26139600 | 4.53989700  | 2.53876700  |
| C  | -0.16116100 | -1.23146200 | 2.69024800  |
| C  | 0.12892500  | -2.50479900 | 3.30277800  |
| C  | -0.29207100 | -3.46368600 | 2.43015200  |
| C  | -0.84461800 | -2.77434500 | 1.28949600  |
| N  | -0.74460100 | -1.41878300 | 1.46350400  |
| H  | 0.58828800  | -2.62931600 | 4.27500800  |
| H  | -0.25315400 | -4.54007600 | 2.53818500  |
| C  | -1.42563100 | 3.41080600  | 0.19860500  |
| C  | -1.41897100 | -3.41282400 | 0.19793900  |
| C  | -3.26546000 | -0.00252500 | -2.68345600 |
| C  | 0.12132600  | 0.00020300  | 3.26664700  |
| H  | -3.84257400 | -0.00300700 | -3.60286200 |
| H  | -1.40318600 | -4.49827200 | 0.19249700  |
| H  | 0.58467900  | 0.00055700  | 4.24829200  |
| H  | -1.41187600 | 4.49628200  | 0.19332400  |
| Fe | -1.41248000 | -0.00100300 | 0.19898000  |
| Cl | -3.44573500 | -0.00314700 | 1.35597900  |

|   |             |             |             |
|---|-------------|-------------|-------------|
| O | -0.05337100 | 0.00071900  | -0.74550800 |
| H | 1.22790900  | 0.00046100  | -0.09032700 |
| C | 4.12357000  | -3.57650400 | -1.17802700 |
| C | 4.45940200  | -2.33957700 | -1.71614000 |
| C | 2.66044000  | -2.50330300 | 0.42240900  |
| C | 3.22494600  | -3.65866600 | -0.10214900 |
| H | 4.56288400  | -4.47918300 | -1.59276100 |
| H | 5.15661800  | -2.24159100 | -2.54170800 |
| H | 2.96564700  | -4.62602000 | 0.31808200  |
| C | 2.33780800  | 0.00151400  | 0.37399000  |
| C | 2.97805800  | -1.23984100 | -0.10366600 |
| C | 3.88674500  | -1.18505700 | -1.17673200 |
| H | 2.10101800  | 0.00145500  | 1.44463800  |
| H | 1.95927600  | -2.56134400 | 1.24807300  |
| C | 2.97547200  | 1.24406200  | -0.10404800 |
| C | 2.65510100  | 2.50701900  | 0.42156400  |
| C | 3.21715600  | 3.66340600  | -0.10336700 |
| C | 4.11602400  | 3.58279400  | -1.17915900 |
| C | 4.45451800  | 2.34640500  | -1.71684000 |
| C | 3.88427800  | 1.19085500  | -1.17708000 |
| H | 1.95375600  | 2.56383500  | 1.24715600  |
| H | 2.95574000  | 4.63034900  | 0.31649800  |
| H | 4.55343200  | 4.48626800  | -1.59417700 |
| H | 5.15196700  | 2.24963000  | -2.54235500 |
| O | 4.27127000  | 0.00321300  | -1.74307100 |

**cat1/a13**

|   |             |             |             |
|---|-------------|-------------|-------------|
| C | 1.20160600  | -0.89416600 | 2.87391600  |
| C | 1.36288500  | -2.11189200 | 3.62953400  |
| C | 1.77647200  | -3.06791300 | 2.75157200  |
| C | 1.89405400  | -2.42849100 | 1.46336800  |
| N | 1.52136100  | -1.11191900 | 1.55904100  |
| H | 1.17447000  | -2.20514300 | 4.69138500  |
| H | 2.00868900  | -4.10746700 | 2.94445600  |
| C | 2.85299100  | -0.88145200 | -2.43059800 |
| C | 3.41076600  | -2.09786900 | -2.97646400 |
| C | 3.27008500  | -3.05695500 | -2.02181900 |
| C | 2.64757800  | -2.42135000 | -0.88290900 |
| N | 2.40644100  | -1.10407500 | -1.15665600 |
| H | 3.83776400  | -2.18661800 | -3.96718300 |
| H | 3.56606200  | -4.09754800 | -2.05903700 |
| C | 0.21177400  | 2.81163600  | 0.95318400  |
| C | -0.30419700 | 3.48831200  | 2.11787900  |
| C | -0.13233500 | 2.64287200  | 3.17369300  |

|    |             |             |             |
|----|-------------|-------------|-------------|
| C  | 0.46487200  | 1.43931400  | 2.65017200  |
| N  | 0.65915000  | 1.56258900  | 1.29691000  |
| H  | -0.71736700 | 4.48893100  | 2.11356100  |
| H  | -0.38356800 | 2.80124800  | 4.21468900  |
| C  | 0.93718900  | 2.82193700  | -1.40106500 |
| C  | 1.12831600  | 3.48393900  | -2.67145000 |
| C  | 1.85768800  | 2.63745100  | -3.44723800 |
| C  | 2.09138400  | 1.44773800  | -2.66026600 |
| N  | 1.53106800  | 1.59005500  | -1.42123200 |
| H  | 0.75741100  | 4.47215400  | -2.91143600 |
| H  | 2.20453600  | 2.77948700  | -4.46274000 |
| C  | 0.73525000  | 0.30346600  | 3.39988900  |
| C  | 2.73897400  | 0.31252900  | -3.12762000 |
| C  | 2.38275800  | -3.05312600 | 0.32418600  |
| C  | 0.29496500  | 3.38589000  | -0.30882000 |
| H  | 2.63412200  | -4.10622400 | 0.40269800  |
| H  | 3.13957300  | 0.34396500  | -4.13588400 |
| H  | -0.11900000 | 4.38182500  | -0.43127900 |
| H  | 0.52792500  | 0.34007100  | 4.46452500  |
| Fe | 1.48578600  | 0.21822800  | 0.05741800  |
| Cl | 3.59009300  | 0.96375300  | 0.69815400  |
| O  | 0.03125400  | -0.32183200 | -0.54493300 |
| C  | -5.69117500 | -1.74192000 | -2.11987100 |
| C  | -5.92723200 | -0.46053300 | -1.66793200 |
| C  | -5.03766400 | 0.14708700  | -0.74541000 |
| C  | -3.90090500 | -0.58974900 | -0.28332300 |
| C  | -3.66023200 | -1.90366800 | -0.77832000 |
| C  | -4.55761100 | -2.45693800 | -1.67734600 |
| C  | -5.23792000 | 1.47307600  | -0.27518100 |
| C  | -3.01475000 | 0.01548700  | 0.67248300  |
| C  | -3.24217600 | 1.33137700  | 1.08362300  |
| C  | -4.35084300 | 2.05405300  | 0.61375400  |
| C  | -1.86710000 | -0.73909200 | 1.17558300  |
| C  | -1.98009900 | -2.25336900 | 1.07077100  |
| C  | -2.40831100 | -2.63999000 | -0.35034500 |
| H  | -2.55904400 | -3.72240400 | -0.43542600 |
| H  | -1.02066400 | -2.71639900 | 1.32159100  |
| H  | -6.09936600 | 2.03054600  | -0.63505600 |
| H  | -6.37595700 | -2.20691900 | -2.82387200 |
| H  | -6.79327000 | 0.09870900  | -2.01314900 |
| H  | -4.38026400 | -3.46174100 | -2.05370400 |
| H  | -4.51298700 | 3.07201400  | 0.95712800  |
| H  | -2.54945200 | 1.79187800  | 1.78306500  |
| H  | -0.95713600 | -0.45148600 | 0.42103900  |

|   |             |             |             |
|---|-------------|-------------|-------------|
| H | -1.49078200 | -0.37762900 | 2.13567900  |
| H | -1.59025900 | -2.37309400 | -1.03518700 |
| H | -2.72196700 | -2.61394200 | 1.79990900  |

**cat1/a14**

|    |             |             |             |
|----|-------------|-------------|-------------|
| C  | -0.34779500 | 0.07287900  | -3.01278900 |
| C  | -1.05015800 | 0.99141300  | -3.87227500 |
| C  | -0.85937800 | 2.23860000  | -3.35610000 |
| C  | -0.00349500 | 2.08678000  | -2.20589900 |
| N  | 0.28471800  | 0.75822800  | -2.00840400 |
| H  | -1.62690300 | 0.69991300  | -4.74064900 |
| H  | -1.23253500 | 3.18649500  | -3.72186200 |
| C  | 3.01847000  | 2.19608700  | 0.83609500  |
| C  | 3.05971800  | 3.63042200  | 1.00372800  |
| C  | 2.09778800  | 4.14878800  | 0.19116600  |
| C  | 1.48732300  | 3.03214900  | -0.49156100 |
| N  | 2.05855100  | 1.86078000  | -0.08145800 |
| H  | 3.73688900  | 4.15157400  | 1.66827300  |
| H  | 1.82586500  | 5.18553300  | 0.03942200  |
| C  | 1.34351500  | -3.02657900 | -0.57928300 |
| C  | 0.71844200  | -4.14535300 | -1.24458700 |
| C  | 0.00158800  | -3.63459600 | -2.28378500 |
| C  | 0.17179700  | -2.20303000 | -2.24068000 |
| N  | 0.98156800  | -1.85697100 | -1.19208400 |
| H  | 0.84060500  | -5.18028100 | -0.95166200 |
| H  | -0.59731700 | -4.15980800 | -3.01632000 |
| C  | 2.93212200  | -2.09375700 | 1.06010900  |
| C  | 3.92670200  | -2.24087500 | 2.09859100  |
| C  | 4.39830900  | -0.99384000 | 2.36799500  |
| C  | 3.67608500  | -0.08082000 | 1.51033900  |
| N  | 2.80589000  | -0.77459100 | 0.71730400  |
| H  | 4.21760900  | -3.18472800 | 2.54167700  |
| H  | 5.15225000  | -0.69596800 | 3.08530600  |
| C  | -0.41308400 | -1.30951400 | -3.12450500 |
| C  | 3.80187300  | 1.30120000  | 1.55093300  |
| C  | 0.50132500  | 3.14371400  | -1.46349700 |
| C  | 2.23232400  | -3.14291300 | 0.48352400  |
| Fe | 1.49272200  | -0.00368600 | -0.61774200 |
| Cl | 3.22253900  | -0.02831600 | -2.16406900 |
| O  | 0.40928800  | -0.01435100 | 0.64884800  |
| H  | -0.93241300 | -0.03623400 | 0.53513500  |
| C  | -2.12131300 | -0.01884700 | 0.92645600  |
| C  | -2.42253000 | 1.45894300  | 0.98684600  |
| C  | -3.69688100 | 1.97575000  | 0.69706400  |

|   |             |             |             |
|---|-------------|-------------|-------------|
| C | -1.41184700 | 2.35266700  | 1.38725700  |
| C | -3.95197200 | 3.34323900  | 0.80236000  |
| H | -4.49133400 | 1.29899200  | 0.39814200  |
| C | -1.66551400 | 3.71934500  | 1.48083400  |
| H | -0.42142500 | 1.96428600  | 1.59902400  |
| C | -2.93651100 | 4.22148800  | 1.18955500  |
| H | -4.94723300 | 3.72208800  | 0.58454300  |
| H | -0.86184300 | 4.39102700  | 1.77093100  |
| C | -2.86500700 | -0.80685200 | -0.10770600 |
| C | -3.05640600 | -0.25237500 | -1.39033100 |
| C | -3.37347800 | -2.09864100 | 0.13186900  |
| C | -3.74599700 | -0.94579100 | -2.38084700 |
| H | -2.65485600 | 0.73125400  | -1.60591500 |
| C | -4.05187500 | -2.79626400 | -0.86483900 |
| H | -3.25286500 | -2.54902100 | 1.11024400  |
| C | -4.24662000 | -2.22404000 | -2.12565000 |
| H | -3.87713000 | -0.48849400 | -3.35798700 |
| H | -4.44306900 | -3.78747700 | -0.65122600 |
| H | -4.78207500 | -2.76916600 | -2.89838900 |
| H | -3.13525400 | 5.28752500  | 1.26310100  |
| H | 0.14462700  | 4.13986800  | -1.70393800 |
| H | 4.53122600  | 1.71614900  | 2.23949700  |
| H | 2.42994500  | -4.14195300 | 0.85962000  |
| H | -1.00784300 | -1.71907700 | -3.93376100 |
| C | -1.93586100 | -0.67150500 | 2.27441200  |
| C | -1.13024300 | -1.82131500 | 2.38976600  |
| C | -2.53968700 | -0.15604800 | 3.43140100  |
| C | -0.95022000 | -2.44232600 | 3.62221600  |
| H | -0.62780100 | -2.20471700 | 1.50771200  |
| C | -2.36253400 | -0.78305500 | 4.66543700  |
| H | -3.15580500 | 0.73452800  | 3.35935500  |
| C | -1.56721700 | -1.92623700 | 4.76642100  |
| H | -0.31575800 | -3.32193500 | 3.69262800  |
| H | -2.84617000 | -0.37545200 | 5.54933000  |
| H | -1.42325400 | -2.40837900 | 5.72972400  |

**cat1/a15**

|   |             |             |             |
|---|-------------|-------------|-------------|
| C | -2.92045700 | -2.11580300 | -1.48969100 |
| C | -3.60487800 | -3.37359800 | -1.31147200 |
| C | -4.18393700 | -3.33100500 | -0.08010800 |
| C | -3.85596900 | -2.04498100 | 0.48904900  |
| N | -3.08619500 | -1.32632000 | -0.38850000 |
| H | -3.62541100 | -4.17000200 | -2.04404600 |
| H | -4.78598900 | -4.08434000 | 0.41164100  |

|    |             |             |             |
|----|-------------|-------------|-------------|
| C  | -3.25642800 | 1.66447900  | 2.58117900  |
| C  | -3.99150600 | 1.32130500  | 3.77706000  |
| C  | -4.45206700 | 0.05361000  | 3.60177300  |
| C  | -3.99925800 | -0.37527500 | 2.29812600  |
| N  | -3.27826300 | 0.61874400  | 1.69847400  |
| H  | -4.12672100 | 1.97980900  | 4.62547700  |
| H  | -5.04622600 | -0.55037000 | 4.27550100  |
| C  | -0.74863500 | 1.45627100  | -2.50548800 |
| C  | -0.30081600 | 1.02758600  | -3.80802200 |
| C  | -0.77280100 | -0.23604300 | -3.98889300 |
| C  | -1.50734500 | -0.58077500 | -2.79719000 |
| N  | -1.46140700 | 0.45326700  | -1.89620300 |
| H  | 0.28876100  | 1.63424600  | -4.48320500 |
| H  | -0.64811700 | -0.89154600 | -4.84044300 |
| C  | -0.95832400 | 3.16092400  | -0.73894500 |
| C  | -0.71128500 | 4.47974200  | -0.20608600 |
| C  | -1.30275900 | 4.52160600  | 1.01981900  |
| C  | -1.91498000 | 3.23109200  | 1.22944500  |
| N  | -1.69090200 | 2.42196400  | 0.14769000  |
| H  | -0.16581800 | 5.25866000  | -0.72265400 |
| H  | -1.34031100 | 5.34156200  | 1.72549700  |
| C  | -2.17420500 | -1.78079500 | -2.61247800 |
| C  | -2.63055300 | 2.88324000  | 2.36733300  |
| C  | -4.27344500 | -1.61649500 | 1.74035400  |
| C  | -0.49871700 | 2.71196800  | -1.97046300 |
| Fe | -2.32172000 | 0.51252200  | -0.09039700 |
| Cl | -4.25859000 | 1.38399300  | -1.05438500 |
| O  | -1.02918300 | -0.08510700 | 0.77479900  |
| H  | 0.08255800  | -0.65997900 | 0.23602100  |
| C  | 1.22159500  | -1.11775800 | 0.01707500  |
| C  | 1.59259600  | -1.57929400 | 1.40216600  |
| C  | 2.09051400  | -2.86127000 | 1.68411000  |
| C  | 1.43837000  | -0.67116700 | 2.46773500  |
| C  | 2.44733900  | -3.21616500 | 2.98411900  |
| H  | 2.23255700  | -3.56956200 | 0.87533500  |
| C  | 1.78957300  | -1.02755800 | 3.76518200  |
| H  | 1.02380500  | 0.31013000  | 2.26198700  |
| C  | 2.30006800  | -2.30256000 | 4.02974200  |
| H  | 2.85415700  | -4.20529700 | 3.17739500  |
| H  | 1.66000800  | -0.31321500 | 4.57390300  |
| C  | 0.96826100  | -2.17447100 | -1.01469800 |
| C  | 0.10094300  | -3.24531800 | -0.72392200 |
| C  | 1.56892400  | -2.13381600 | -2.28454700 |
| C  | -0.10682500 | -4.26934100 | -1.64533200 |



|   |             |             |             |
|---|-------------|-------------|-------------|
| H | -0.41320600 | -3.26050000 | 0.23251000  |
| C | 1.35053200  | -3.15247100 | -3.21210100 |
| H | 2.21910500  | -1.30173300 | -2.53617000 |
| C | 0.52243100  | -4.23165800 | -2.89273500 |
| H | -0.77784900 | -5.08617700 | -1.39430400 |
| H | 1.83687400  | -3.10687800 | -4.18312700 |
| C | 1.89921400  | 0.12551400  | -0.45326600 |
| C | 3.15189900  | 0.57077000  | -0.16910200 |
| H | 1.28215100  | 0.76105500  | -1.08267200 |
| C | 4.19944500  | -0.27017500 | 0.47065400  |
| C | 4.90564100  | 0.19771900  | 1.59054000  |
| C | 4.52828700  | -1.52851300 | -0.05538300 |
| C | 5.88869100  | -0.58738800 | 2.18934600  |
| H | 4.66423900  | 1.17564000  | 1.99709100  |
| C | 5.52393300  | -2.30771600 | 0.53348100  |
| H | 3.99423600  | -1.89516100 | -0.92645300 |
| C | 6.20251700  | -1.84293100 | 1.66127500  |
| H | 6.41187000  | -0.21943700 | 3.06794800  |
| H | 5.76636700  | -3.27988400 | 0.11226600  |
| H | 6.97383500  | -2.45232100 | 2.12471000  |
| C | 3.54079500  | 1.94805200  | -0.55714900 |
| C | 4.82462000  | 2.22280800  | -1.06478000 |
| C | 2.63394000  | 3.01484500  | -0.41666800 |
| C | 5.17648700  | 3.51417500  | -1.45080000 |
| H | 5.53974200  | 1.41158000  | -1.16373600 |
| C | 2.99073600  | 4.30776600  | -0.79720300 |
| H | 1.65999800  | 2.82894800  | 0.02215400  |
| C | 4.26000900  | 4.56253900  | -1.32116900 |
| H | 6.16817200  | 3.70487100  | -1.85261200 |
| H | 2.28060200  | 5.11932700  | -0.66337300 |
| H | 4.53917200  | 5.57125300  | -1.61382000 |
| H | 0.36185400  | -5.03053900 | -3.61186100 |
| H | 2.57885100  | -2.58120500 | 5.04254900  |
| H | -4.87305200 | -2.30526300 | 2.32742200  |
| H | -2.71228300 | 3.63020900  | 3.15094500  |
| H | 0.09361800  | 3.39982900  | -2.56478800 |
| H | -2.09898600 | -2.51990500 | -3.40207100 |

**cat1/b1**

|   |             |            |             |
|---|-------------|------------|-------------|
| C | -1.55677100 | 0.04689600 | -1.40747000 |
| C | -2.65840200 | 0.91150300 | -1.75812200 |
| C | -2.28635000 | 2.17207700 | -1.40131500 |
| C | -0.95317300 | 2.07012800 | -0.85393700 |
| N | -0.53360500 | 0.76858200 | -0.85705700 |

|    |             |             |             |
|----|-------------|-------------|-------------|
| H  | -3.59507900 | 0.57686700  | -2.18524300 |
| H  | -2.84758800 | 3.09245600  | -1.49642800 |
| C  | 3.13214100  | 2.38480500  | 0.46225200  |
| C  | 3.17859300  | 3.82395400  | 0.59844500  |
| C  | 1.93070500  | 4.28010200  | 0.30662600  |
| C  | 1.13473800  | 3.11753900  | -0.02056500 |
| N  | 1.88450400  | 1.98038600  | 0.08535200  |
| H  | 4.05665200  | 4.38952800  | 0.88223200  |
| H  | 1.56876200  | 5.30002300  | 0.29449200  |
| C  | 1.32660800  | -2.95161500 | -0.29677000 |
| C  | 0.55808600  | -4.10524300 | -0.69752700 |
| C  | -0.60021900 | -3.63233300 | -1.23806600 |
| C  | -0.54248000 | -2.19415800 | -1.14262000 |
| N  | 0.62506500  | -1.79808300 | -0.55223700 |
| H  | 0.88819700  | -5.13136600 | -0.59974300 |
| H  | -1.42175000 | -4.18956400 | -1.66967400 |
| C  | 3.44639800  | -1.90896300 | 0.45324700  |
| C  | 4.82392700  | -1.99789700 | 0.87867200  |
| C  | 5.27650300  | -0.71893100 | 0.99238600  |
| C  | 4.16831000  | 0.14218800  | 0.65061700  |
| N  | 3.07171000  | -0.60411100 | 0.31687600  |
| H  | 5.35834500  | -2.92274600 | 1.05328000  |
| H  | 6.25921600  | -0.37311500 | 1.28571100  |
| C  | -1.55580700 | -1.33368800 | -1.56023100 |
| C  | 4.20414600  | 1.53115200  | 0.70525200  |
| C  | -0.19171600 | 3.15858400  | -0.43640300 |
| C  | 2.62484100  | -3.00410100 | 0.19470100  |
| Fe | 1.24155000  | 0.07608900  | -0.20241300 |
| Cl | 2.03233500  | 0.23509800  | -2.40226600 |
| O  | 0.78166500  | 0.09864500  | 1.45890800  |
| H  | 0.04394800  | -0.76573800 | 1.80946600  |
| C  | -4.12316800 | -1.38178100 | 0.59166300  |
| C  | -4.48572900 | -0.06117400 | 0.85237300  |
| C  | -3.73060800 | 0.75432600  | 1.70382400  |
| C  | -2.57390500 | 0.24426500  | 2.26521300  |
| C  | -2.14406000 | -1.07559000 | 1.98610900  |
| C  | -2.95541500 | -1.88010100 | 1.15576000  |
| H  | -4.73874400 | -1.98328700 | -0.06598400 |
| H  | -4.04654800 | 1.77514800  | 1.87846800  |
| H  | -1.95149100 | 0.87748500  | 2.89028900  |
| C  | -0.84905200 | -1.53536400 | 2.46180800  |
| H  | -0.58280100 | -2.56865100 | 2.23992600  |
| H  | -0.55938700 | -1.21494000 | 3.46377500  |
| H  | -0.66376800 | 4.13559400  | -0.48548900 |

|   |             |             |             |
|---|-------------|-------------|-------------|
| H | -2.43221500 | -1.78226900 | -2.01658500 |
| H | 3.05540600  | -3.98993100 | 0.34481500  |
| H | 5.14627800  | 1.98949100  | 0.99150500  |
| H | -2.64628200 | -2.89865400 | 0.94263800  |
| N | -5.64019000 | 0.50890400  | 0.16360400  |
| O | -6.15635500 | -0.15733900 | -0.73997200 |
| O | -6.02060700 | 1.63112700  | 0.50262700  |

**cat1/b2**

|   |             |             |             |
|---|-------------|-------------|-------------|
| C | -1.58341000 | -2.73861100 | 1.02778100  |
| C | -2.23049900 | -3.96727100 | 0.63713100  |
| C | -3.01615800 | -3.66849200 | -0.43510800 |
| C | -2.86086100 | -2.25390300 | -0.67947500 |
| N | -1.96946500 | -1.71195000 | 0.20859400  |
| H | -2.09115100 | -4.92182400 | 1.12781000  |
| H | -3.66265100 | -4.32552300 | -1.00236800 |
| C | -3.11474800 | 1.95996800  | -1.54787400 |
| C | -4.14094400 | 1.88047700  | -2.56373100 |
| C | -4.41693200 | 0.55930100  | -2.73282200 |
| C | -3.57102400 | -0.15937300 | -1.80517000 |
| N | -2.79307000 | 0.71029100  | -1.09743400 |
| H | -4.57202800 | 2.73233000  | -3.07345900 |
| H | -5.12787500 | 0.09751000  | -3.40571500 |
| C | 0.79235800  | 0.58708700  | 2.33183300  |
| C | 1.52413800  | -0.09436500 | 3.37314700  |
| C | 1.04104100  | -1.36847600 | 3.41939700  |
| C | 0.03301400  | -1.46305900 | 2.39173000  |
| N | -0.09880800 | -0.26264200 | 1.73934000  |
| H | 2.28889600  | 0.36063300  | 3.98926600  |
| H | 1.33093800  | -2.17757100 | 4.07721200  |
| C | 0.14507500  | 2.67587200  | 1.16045400  |
| C | 0.24980600  | 4.10449600  | 0.95932600  |
| C | -0.74818400 | 4.44791400  | 0.10157300  |
| C | -1.44362500 | 3.22429800  | -0.23233000 |
| N | -0.88838000 | 2.16532500  | 0.42401500  |
| H | 0.98626000  | 4.74203000  | 1.43101900  |
| H | -1.00046700 | 5.42664200  | -0.28540500 |
| C | -0.66757700 | -2.61900700 | 2.06960800  |
| C | -2.50289300 | 3.13652900  | -1.13179500 |
| C | -3.58056700 | -1.54027400 | -1.63340700 |
| C | 0.94194800  | 1.94025200  | 2.02754300  |
| H | -4.25320100 | -2.11027800 | -2.26783800 |
| H | -2.85314800 | 4.06288000  | -1.57736200 |
| H | 1.71635000  | 2.48030900  | 2.56436600  |

|    |             |             |             |
|----|-------------|-------------|-------------|
| H  | -0.46222500 | -3.50816100 | 2.65813900  |
| Fe | -1.40286200 | 0.21243500  | 0.28561900  |
| Cl | -3.02924800 | 0.61040300  | 1.92890100  |
| O  | -0.26863800 | 0.06881100  | -0.99951100 |
| H  | 0.45975800  | -0.92398900 | -0.92926300 |
| C  | 4.50396900  | -0.43222200 | -2.15049900 |
| C  | 5.07014900  | -0.12921800 | -0.91068800 |
| C  | 4.41682000  | -0.43530200 | 0.28601600  |
| C  | 3.17772500  | -1.05397300 | 0.23046300  |
| C  | 2.56984700  | -1.37545700 | -1.00408200 |
| C  | 3.25979900  | -1.04866000 | -2.19035200 |
| H  | 5.04147300  | -0.18013200 | -3.05635000 |
| H  | 4.88650900  | -0.18718000 | 1.22979000  |
| H  | 2.65999300  | -1.29327400 | 1.15365300  |
| H  | 2.81653300  | -1.27829000 | -3.15328500 |
| C  | 1.22323500  | -1.96376600 | -1.00709200 |
| C  | 0.69899900  | -2.69150300 | -2.22817200 |
| H  | 0.67249400  | -2.04023600 | -3.10827600 |
| H  | -0.32186800 | -3.03842500 | -2.04374200 |
| H  | 1.32092200  | -3.56436000 | -2.47233000 |
| H  | 0.97823500  | -2.45963900 | -0.06601300 |
| N  | 6.37897400  | 0.52756500  | -0.86222100 |
| O  | 6.94061100  | 0.77246500  | -1.93173600 |
| O  | 6.84429000  | 0.79956000  | 0.24703000  |

**cat1/b3**

|   |             |             |             |
|---|-------------|-------------|-------------|
| C | 0.93249200  | -2.72720800 | -1.10900000 |
| C | -0.00686500 | -3.64535200 | -1.70644200 |
| C | -1.12471500 | -2.92297200 | -1.99832500 |
| C | -0.86032000 | -1.56817300 | -1.57954300 |
| N | 0.38488600  | -1.47057800 | -1.02130000 |
| H | 0.18482200  | -4.69573300 | -1.88377600 |
| H | -2.04265500 | -3.25516100 | -2.46563100 |
| C | -0.52850200 | 2.60430200  | -0.61712700 |
| C | -1.82849600 | 3.01553800  | -1.09395100 |
| C | -2.43435900 | 1.90062900  | -1.58659500 |
| C | -1.50254700 | 0.81327500  | -1.40023200 |
| N | -0.35116300 | 1.26291700  | -0.81042700 |
| H | -2.21158000 | 4.02681400  | -1.05101900 |
| H | -3.42517200 | 1.80634900  | -2.01075000 |
| C | 4.16635000  | -0.38356800 | 0.50108900  |
| C | 5.12988300  | -1.45227400 | 0.62341800  |
| C | 4.50947300  | -2.58570900 | 0.19437600  |
| C | 3.17196300  | -2.20025300 | -0.18998000 |

|    |             |             |             |
|----|-------------|-------------|-------------|
| N  | 2.98514700  | -0.86170300 | 0.00302400  |
| H  | 6.14171700  | -1.33181300 | 0.98828100  |
| H  | 4.90509500  | -3.59117200 | 0.13092100  |
| C  | 3.50580000  | 1.99000800  | 0.75595600  |
| C  | 3.78750400  | 3.35643800  | 1.13892700  |
| C  | 2.65568200  | 4.06829400  | 0.89141600  |
| C  | 1.69128000  | 3.13292600  | 0.35468100  |
| N  | 2.22970800  | 1.87840400  | 0.28469000  |
| H  | 4.73201200  | 3.70369300  | 1.53743500  |
| H  | 2.47374200  | 5.12459200  | 1.04178600  |
| C  | 2.21435900  | -3.07200300 | -0.70158500 |
| C  | 0.40889900  | 3.47057900  | -0.05845700 |
| C  | -1.74730500 | -0.50759400 | -1.74856600 |
| C  | 4.41212800  | 0.93931100  | 0.85176600  |
| Fe | 1.28745400  | 0.18560700  | -0.33366100 |
| Cl | 2.10908300  | 0.62873000  | -2.48465300 |
| O  | 0.82821800  | 0.00756900  | 1.32058700  |
| H  | -0.01604900 | -0.83318400 | 1.60580800  |
| C  | -4.29038900 | -1.31716500 | 0.50943300  |
| C  | -4.51867800 | 0.05408800  | 0.60219300  |
| C  | -3.61298900 | 0.90176700  | 1.24619700  |
| C  | -2.46193100 | 0.35981100  | 1.79373900  |
| C  | -2.18285500 | -1.02270900 | 1.70830500  |
| C  | -3.12169200 | -1.84361500 | 1.05124400  |
| H  | -5.01396600 | -1.94611600 | 0.00507900  |
| H  | -3.80561900 | 1.96612500  | 1.27456800  |
| C  | -0.90455600 | -1.54890400 | 2.25006100  |
| H  | -2.70888300 | -0.73265100 | -2.19830200 |
| H  | 2.50589300  | -4.11173100 | -0.81857900 |
| H  | 5.40051400  | 1.17205200  | 1.23718200  |
| H  | 0.11639700  | 4.51200200  | 0.03970500  |
| C  | -0.57251500 | -1.13536100 | 3.68093800  |
| H  | 0.46584200  | -1.39019300 | 3.91463800  |
| H  | -0.69708800 | -0.06266400 | 3.84627600  |
| H  | -1.22544900 | -1.66712300 | 4.38840800  |
| C  | -0.56199400 | -3.00033200 | 1.96953300  |
| H  | -0.74447500 | -3.28242800 | 0.93064100  |
| H  | 0.49735500  | -3.17961600 | 2.18193400  |
| H  | -1.14635000 | -3.67242500 | 2.61663100  |
| H  | -2.94071900 | -2.90844900 | 0.96197100  |
| H  | -1.72822700 | 1.02042700  | 2.24205600  |
| N  | -5.69706200 | 0.62658900  | -0.04837400 |
| O  | -6.53444600 | -0.14906200 | -0.51442600 |
| O  | -5.77584800 | 1.85676300  | -0.11304500 |

**cat1/b4**

|    |             |             |             |
|----|-------------|-------------|-------------|
| C  | -0.14217000 | -1.42130900 | 2.50351100  |
| C  | 0.80777200  | -1.30384700 | 3.58271200  |
| C  | 1.28623400  | -0.02798700 | 3.54176800  |
| C  | 0.61218200  | 0.63116200  | 2.44843400  |
| N  | -0.24294900 | -0.23276100 | 1.82329000  |
| H  | 1.06272300  | -2.09956400 | 4.27069400  |
| H  | 2.01335600  | 0.44207500  | 4.19129100  |
| C  | -1.47794400 | 3.21380800  | -0.28927200 |
| C  | -0.79736600 | 4.44298800  | 0.05355200  |
| C  | 0.15038600  | 4.11773200  | 0.97338500  |
| C  | 0.03031800  | 2.69463300  | 1.20130600  |
| N  | -0.96268900 | 2.16917700  | 0.42081300  |
| H  | -1.02471000 | 5.41298900  | -0.36925700 |
| H  | 0.86177700  | 4.76465600  | 1.47012800  |
| C  | -2.90808700 | -2.26629000 | -0.66877400 |
| C  | -3.08569500 | -3.67313900 | -0.39651800 |
| C  | -2.34672400 | -3.95200200 | 0.71295200  |
| C  | -1.70486400 | -2.71905900 | 1.09986800  |
| N  | -2.05031000 | -1.70921100 | 0.24322700  |
| H  | -3.71432700 | -4.33854300 | -0.97405500 |
| H  | -2.23538100 | -4.89533100 | 1.23177200  |
| C  | -3.54837200 | -0.19666900 | -1.87893100 |
| C  | -4.34419000 | 0.50282700  | -2.86392300 |
| C  | -4.06476500 | 1.82605900  | -2.71810300 |
| C  | -3.08666500 | 1.92595300  | -1.65762300 |
| N  | -2.79631200 | 0.68591800  | -1.15999700 |
| H  | -5.02777200 | 0.02810200  | -3.55593600 |
| H  | -4.46485300 | 2.66686100  | -3.26977300 |
| C  | -0.83010700 | -2.58219500 | 2.17426000  |
| C  | -2.48922300 | 3.10893600  | -1.24082100 |
| C  | 0.77713500  | 1.97805400  | 2.12682700  |
| C  | -3.57917500 | -1.57263400 | -1.67067900 |
| H  | 1.52005400  | 2.52995100  | 2.69516800  |
| H  | -2.81104400 | 4.02587700  | -1.72555900 |
| H  | -4.22901200 | -2.15376800 | -2.31860400 |
| H  | -0.65461500 | -3.45909800 | 2.79017800  |
| Fe | -1.47880600 | 0.21565300  | 0.30269400  |
| Cl | -3.18135500 | 0.65621200  | 1.85155200  |
| O  | -0.29103200 | 0.03299500  | -0.92728700 |
| H  | 0.46081800  | -0.93565000 | -0.73679900 |
| C  | 1.23165300  | -2.38773600 | -2.21471200 |
| C  | 2.22729600  | -1.43504400 | -2.92788100 |

|   |            |             |             |
|---|------------|-------------|-------------|
| C | 1.27272600 | -1.93167800 | -0.75746900 |
| C | 2.58558600 | -1.31590100 | -0.55959200 |
| C | 3.24286700 | -0.97906900 | 0.63147700  |
| C | 4.48352800 | -0.35389900 | 0.56544500  |
| C | 5.03956000 | -0.06909500 | -0.68707100 |
| C | 4.39536200 | -0.38677400 | -1.88959900 |
| C | 3.16085400 | -1.01116700 | -1.81483600 |
| H | 2.79245300 | -1.20482700 | 1.59232700  |
| H | 4.86962500 | -0.14249500 | -2.83258900 |
| H | 5.03262500 | -0.08442500 | 1.45901500  |
| H | 2.74529800 | -1.89854500 | -3.77414600 |
| H | 0.22297800 | -2.34844100 | -2.63629300 |
| H | 0.86722700 | -2.58457900 | 0.01595100  |
| H | 1.69269300 | -0.55511900 | -3.31019200 |
| H | 1.58428000 | -3.42688700 | -2.28631900 |
| N | 6.34999200 | 0.58921300  | -0.74224000 |
| O | 6.89556400 | 0.87944900  | 0.32487000  |
| O | 6.83234300 | 0.81729000  | -1.85348900 |

**cat1/b5**

|   |             |             |             |
|---|-------------|-------------|-------------|
| C | -0.12885100 | -1.04347000 | 2.67195500  |
| C | 0.77632500  | -0.74405500 | 3.75394500  |
| C | 1.16663700  | 0.55120400  | 3.58597500  |
| C | 0.48673800  | 1.03740200  | 2.40920700  |
| N | -0.28741800 | 0.05341800  | 1.86282600  |
| H | 1.06472200  | -1.44191900 | 4.52915600  |
| H | 1.83939500  | 1.13878000  | 4.19705600  |
| C | -1.60785800 | 3.12682100  | -0.71634800 |
| C | -1.01541200 | 4.42890400  | -0.50486900 |
| C | -0.10307100 | 4.28144200  | 0.49280800  |
| C | -0.15537100 | 2.89350000  | 0.89479200  |
| N | -1.07415400 | 2.21283200  | 0.14378000  |
| H | -1.27335900 | 5.32181800  | -1.05924200 |
| H | 0.54361200  | 5.02813000  | 0.93482600  |
| C | -2.76170300 | -2.42674100 | -0.42842000 |
| C | -2.87134500 | -3.79652800 | 0.01274800  |
| C | -2.14108500 | -3.89633200 | 1.15817500  |
| C | -1.57547700 | -2.59171500 | 1.39944000  |
| N | -1.95477500 | -1.71454200 | 0.41916500  |
| H | -3.45144400 | -4.56119500 | -0.48734600 |
| H | -1.98953900 | -4.76152200 | 1.79038500  |
| C | -3.46713000 | -0.56214300 | -1.90494700 |
| C | -4.25876500 | -0.03545800 | -2.99426900 |
| C | -4.03528100 | 1.30600500  | -3.02087700 |

|    |             |             |             |
|----|-------------|-------------|-------------|
| C  | -3.09763400 | 1.58795500  | -1.95742500 |
| N  | -2.77464800 | 0.44003500  | -1.28922600 |
| H  | -4.89952500 | -0.62761000 | -3.63464700 |
| H  | -4.44904500 | 2.04792000  | -3.69136100 |
| C  | -0.73513200 | -2.27616300 | 2.46367500  |
| C  | -2.56834200 | 2.84353400  | -1.68396900 |
| C  | 0.58317100  | 2.34539800  | 1.93454900  |
| C  | -3.44218600 | -1.89951700 | -1.52185600 |
| H  | 1.26436600  | 3.00851000  | 2.45951800  |
| H  | -2.91156000 | 3.67081300  | -2.29805100 |
| H  | -4.04623200 | -2.58974200 | -2.10354900 |
| H  | -0.52110300 | -3.06389500 | 3.17978700  |
| Fe | -1.47632400 | 0.23086600  | 0.24962200  |
| Cl | -3.25430200 | 0.76140200  | 1.68748000  |
| O  | -0.23042000 | -0.03657200 | -0.87925200 |
| H  | 0.49706000  | -1.02258800 | -0.70911800 |
| C  | 1.38833400  | -2.60671100 | -1.92527300 |
| C  | 2.52707900  | -2.21224700 | -2.56124100 |
| C  | 1.33654300  | -2.02415200 | -0.57855600 |
| C  | 2.63039300  | -1.33785100 | -0.40416900 |
| C  | 3.16633000  | -0.64794000 | 0.67906000  |
| C  | 4.40791800  | -0.02287600 | 0.53666000  |
| C  | 5.07611100  | -0.09626200 | -0.68921100 |
| C  | 4.56099800  | -0.78545300 | -1.79470600 |
| C  | 3.33063500  | -1.41270800 | -1.64135900 |
| H  | 2.63502600  | -0.59265400 | 1.62305800  |
| H  | 5.12348200  | -0.81672100 | -2.71990400 |
| H  | 4.86535800  | 0.52028900  | 1.35384500  |
| H  | 2.80957600  | -2.44365000 | -3.58210000 |
| H  | 0.59229000  | -3.20551400 | -2.35198200 |
| H  | 0.87448700  | -2.55982600 | 0.24947700  |
| N  | 6.37448700  | 0.57482700  | -0.82263300 |
| O  | 6.95336200  | 0.49885100  | -1.90850700 |
| O  | 6.81707600  | 1.17962000  | 0.15682200  |

**cat1/b6**

|   |             |             |             |
|---|-------------|-------------|-------------|
| C | -0.12089100 | 3.04985900  | 0.40025800  |
| C | -0.03016300 | 4.33821900  | -0.25107400 |
| C | -0.94567100 | 4.32806300  | -1.25680400 |
| C | -1.57580300 | 3.02648000  | -1.22729500 |
| N | -1.06401500 | 2.27194700  | -0.21128900 |
| H | 0.64133800  | 5.13368900  | 0.04494000  |
| H | -1.18053100 | 5.11140100  | -1.96573300 |
| C | -3.45715700 | -0.79679700 | -1.76909900 |



|    |             |             |             |
|----|-------------|-------------|-------------|
| C  | -4.21494600 | -0.47112100 | -2.95725200 |
| C  | -3.98527700 | 0.84497300  | -3.21383600 |
| C  | -3.07317700 | 1.31063400  | -2.19289500 |
| N  | -2.77442300 | 0.29895000  | -1.32452500 |
| H  | -4.84245500 | -1.16654000 | -3.49957900 |
| H  | -4.37846600 | 1.45643600  | -4.01562900 |
| C  | -0.25039300 | -0.46127700 | 2.91284000  |
| C  | 0.66882700  | 0.00851100  | 3.92053800  |
| C  | 1.12400200  | 1.22140300  | 3.49598900  |
| C  | 0.46461900  | 1.49384300  | 2.24085100  |
| N  | -0.35468300 | 0.45446200  | 1.89675900  |
| H  | 0.92254300  | -0.52942500 | 4.82475600  |
| H  | 1.82459100  | 1.88790000  | 3.98224100  |
| C  | -1.71887600 | -2.18609800 | 1.93049100  |
| C  | -2.30651800 | -3.50347900 | 1.92059500  |
| C  | -2.98907500 | -3.61560800 | 0.74708600  |
| C  | -2.83311300 | -2.35715500 | 0.05639400  |
| N  | -2.04285900 | -1.50845800 | 0.78517400  |
| H  | -2.19942200 | -4.23333600 | 2.71255700  |
| H  | -3.56609700 | -4.45403100 | 0.37894800  |
| C  | 0.60859300  | 2.68001400  | 1.52319100  |
| C  | -3.46125300 | -2.03984400 | -1.14497200 |
| C  | -2.53427600 | 2.59119600  | -2.13732400 |
| C  | -0.90055400 | -1.68954400 | 2.94057300  |
| H  | -2.85761100 | 3.29953300  | -2.89428500 |
| H  | -4.05451400 | -2.82211400 | -1.60958900 |
| H  | -0.73090500 | -2.32552000 | 3.80416300  |
| H  | 1.31722700  | 3.40544200  | 1.91194800  |
| Fe | -1.52398300 | 0.35987300  | 0.26512600  |
| Cl | -3.31474800 | 1.19354800  | 1.52611600  |
| O  | -0.26141800 | -0.13821900 | -0.78867400 |
| H  | 3.29366700  | -3.39642500 | -2.40255600 |
| C  | 5.01788400  | -0.08250700 | -0.47172000 |
| C  | 4.52197100  | -0.87442500 | -1.50682000 |
| C  | 3.11236700  | -0.57584300 | 0.88057900  |
| C  | 4.32590300  | 0.07537400  | 0.73203600  |
| H  | 4.74212000  | 0.69814000  | 1.51384900  |
| C  | 2.58178300  | -1.38387900 | -0.14766000 |
| C  | 3.30229700  | -1.53223100 | -1.35940100 |
| C  | 0.85905400  | -3.07593900 | -0.96973500 |
| C  | 1.26208200  | -2.65868900 | -2.39005500 |
| C  | 2.77778900  | -2.42578100 | -2.46847200 |
| C  | 1.25392900  | -1.99018100 | 0.01300200  |
| H  | -0.21947800 | -3.25534900 | -0.90365500 |

|   |            |             |             |
|---|------------|-------------|-------------|
| H | 0.96609300 | -3.42226900 | -3.11854700 |
| H | 0.47703000 | -1.02113900 | -0.30141300 |
| H | 0.96197800 | -2.16744400 | 1.04969700  |
| H | 3.05357100 | -2.00216900 | -3.44168000 |
| H | 1.35963300 | -4.02024900 | -0.69973000 |
| H | 0.72779700 | -1.73465200 | -2.64200000 |
| H | 5.09708700 | -0.96581000 | -2.42128700 |
| H | 2.55019300 | -0.46104700 | 1.80243400  |
| N | 6.29863100 | 0.60815100  | -0.65362500 |
| O | 6.89093100 | 0.45359200  | -1.72356000 |
| O | 6.71130900 | 1.30632500  | 0.27541000  |

**cat1/b7**

|   |             |             |             |
|---|-------------|-------------|-------------|
| C | -2.69949500 | 1.95550600  | 0.07161300  |
| C | -3.40476900 | 2.86031500  | -0.80386000 |
| C | -3.54292400 | 2.21602700  | -1.99491500 |
| C | -2.92152300 | 0.92171900  | -1.83830400 |
| N | -2.41586700 | 0.78452700  | -0.57664000 |
| H | -3.73195500 | 3.85374000  | -0.52798400 |
| H | -4.01725700 | 2.56627700  | -2.90253000 |
| C | -1.32307100 | -3.07451400 | -1.89572400 |
| C | -1.68891800 | -3.40690000 | -3.25528900 |
| C | -2.29753900 | -2.30625300 | -3.77169400 |
| C | -2.30410200 | -1.31012700 | -2.72262500 |
| N | -1.70479300 | -1.79912900 | -1.59538800 |
| H | -1.49710900 | -4.36031700 | -3.73020600 |
| H | -2.71401400 | -2.16414600 | -4.76051400 |
| C | -0.55099100 | -0.33009400 | 3.02416800  |
| C | -0.58413000 | 0.65421800  | 4.07773100  |
| C | -1.27312600 | 1.72409500  | 3.58950800  |
| C | -1.64995500 | 1.39042500  | 2.23838100  |
| N | -1.19295100 | 0.14527200  | 1.90530400  |
| H | -0.14779800 | 0.52225400  | 5.05940200  |
| H | -1.51675400 | 2.65487200  | 4.08518000  |
| C | 0.04218500  | -2.57340000 | 2.15839900  |
| C | 0.63575000  | -3.88029000 | 2.31857800  |
| C | 0.42472500  | -4.54598800 | 1.15019300  |
| C | -0.28959400 | -3.63903300 | 0.28230300  |
| N | -0.51508000 | -2.44875400 | 0.91809700  |
| H | 1.13710800  | -4.22585500 | 3.21339300  |
| H | 0.71970900  | -5.55225700 | 0.88254300  |
| C | -2.34822600 | 2.24045000  | 1.38364400  |
| C | -0.66892100 | -3.93622300 | -1.02164300 |
| C | -2.86314900 | -0.04432800 | -2.84008900 |

|    |             |             |             |
|----|-------------|-------------|-------------|
| C  | 0.03546900  | -1.58364700 | 3.13774500  |
| H  | -3.31172900 | 0.21097200  | -3.79572300 |
| H  | -0.42340900 | -4.92645200 | -1.39385400 |
| H  | 0.51376300  | -1.82097500 | 4.08361800  |
| H  | -2.62955700 | 3.21317200  | 1.77276200  |
| Fe | -1.41642200 | -0.80722000 | 0.15402200  |
| Cl | -3.46170600 | -1.69261000 | 0.87387200  |
| O  | 0.06819300  | -0.26759000 | -0.50017400 |
| H  | 0.63072400  | 0.62463900  | 0.14547300  |
| C  | 4.69901000  | 1.21663300  | -1.15502000 |
| C  | 5.17317300  | 0.05992800  | -0.53609700 |
| C  | 4.43998200  | -0.58939000 | 0.46164000  |
| C  | 3.21507000  | -0.06239500 | 0.83763100  |
| C  | 2.70152700  | 1.10613000  | 0.23199100  |
| C  | 3.46583300  | 1.73124200  | -0.77136100 |
| H  | 5.29942000  | 1.69546300  | -1.91875900 |
| H  | 4.83803800  | -1.48736000 | 0.91762400  |
| H  | 2.62257000  | -0.56479900 | 1.59772500  |
| H  | 3.09528800  | 2.63524700  | -1.24205500 |
| C  | 1.36452000  | 1.57711100  | 0.65582500  |
| H  | 1.20871800  | 1.45164600  | 1.72947700  |
| C  | 0.75991600  | 2.81911700  | 0.11908100  |
| C  | 0.44591300  | 2.93348100  | -1.24847900 |
| C  | 0.41655100  | 3.87912000  | 0.97572900  |
| C  | -0.16852000 | 4.08032500  | -1.74273500 |
| H  | 0.65049700  | 2.09195700  | -1.90366400 |
| C  | -0.19122900 | 5.03340000  | 0.47790100  |
| H  | 0.63514500  | 3.79319100  | 2.03693800  |
| C  | -0.48463100 | 5.13834300  | -0.88259600 |
| H  | -0.41887400 | 4.14483300  | -2.79797900 |
| H  | -0.43892400 | 5.84741900  | 1.15438800  |
| H  | -0.96511100 | 6.03226400  | -1.27097000 |
| N  | 6.47170900  | -0.48678200 | -0.93902300 |
| O  | 7.09390100  | 0.10099700  | -1.82618300 |
| O  | 6.86884100  | -1.50461200 | -0.36750700 |

**cat1/b8**

|   |             |            |            |
|---|-------------|------------|------------|
| C | -1.62877700 | 1.26962500 | 2.60084700 |
| C | -1.99156700 | 2.58346000 | 3.07139000 |
| C | -2.53912300 | 3.23914100 | 2.00935700 |
| C | -2.52356100 | 2.31481100 | 0.90066000 |
| N | -1.95168500 | 1.12918100 | 1.27606300 |
| H | -1.83977200 | 2.94144400 | 4.08134400 |
| H | -2.93915900 | 4.24406200 | 1.96930200 |

|    |             |             |             |
|----|-------------|-------------|-------------|
| C  | -3.13112100 | -0.16100300 | -2.56945100 |
| C  | -3.83847700 | 0.81123600  | -3.37266700 |
| C  | -3.87473500 | 1.96084400  | -2.64680400 |
| C  | -3.20514900 | 1.67869300  | -1.39652600 |
| N  | -2.76398900 | 0.38613000  | -1.37294100 |
| H  | -4.23772000 | 0.62155500  | -4.36054000 |
| H  | -4.31592000 | 2.91353200  | -2.90953100 |
| C  | -0.16560800 | -2.63775900 | 1.58651300  |
| C  | 0.41507100  | -2.96273500 | 2.86757400  |
| C  | 0.15430600  | -1.90912000 | 3.69235900  |
| C  | -0.56981100 | -0.94116100 | 2.90614000  |
| N  | -0.74707100 | -1.40032900 | 1.62637800  |
| H  | 0.93354100  | -3.88549100 | 3.09379700  |
| H  | 0.41992100  | -1.78445300 | 4.73405400  |
| C  | -0.83244600 | -3.28211300 | -0.71265300 |
| C  | -0.90627100 | -4.24121900 | -1.79249300 |
| C  | -1.68603400 | -3.67998200 | -2.75494400 |
| C  | -2.06899200 | -2.37417700 | -2.26538800 |
| N  | -1.54483300 | -2.15772300 | -1.02365500 |
| H  | -0.42774500 | -5.21190800 | -1.78966200 |
| H  | -1.97835200 | -4.08979800 | -3.71296900 |
| C  | -0.99708400 | 0.29808000  | 3.37043200  |
| C  | -2.82886500 | -1.45432200 | -2.98068800 |
| C  | -3.07111800 | 2.58454900  | -0.35087400 |
| C  | -0.17081100 | -3.49694000 | 0.48962600  |
| H  | -3.47678200 | 3.58003700  | -0.50527800 |
| H  | -3.18531700 | -1.75974700 | -3.95985500 |
| H  | 0.34918800  | -4.44333200 | 0.60507100  |
| H  | -0.79805000 | 0.53706100  | 4.41075600  |
| Fe | -1.70473800 | -0.48932400 | 0.11172400  |
| Cl | -3.72909500 | -1.34697600 | 0.92086200  |
| O  | -0.28078500 | 0.08155100  | -0.62175700 |
| H  | 0.52697600  | 0.65695700  | 0.12347000  |
| C  | 4.99220100  | -0.67348800 | -0.32650400 |
| C  | 4.18927700  | -1.38903900 | 0.56874600  |
| C  | 3.00002200  | -0.82119400 | 1.02427100  |
| C  | 2.64552700  | 0.45368800  | 0.58149600  |
| C  | 3.47871500  | 1.16748500  | -0.32300300 |
| C  | 4.66050800  | 0.60580100  | -0.78667300 |
| H  | 2.36155400  | -1.36487600 | 1.71335400  |
| H  | 5.32224600  | 1.11818700  | -1.47438800 |
| C  | 1.43365600  | 1.24789200  | 0.84775500  |
| C  | 1.65630900  | 2.53857000  | 0.17157800  |
| C  | 0.86300600  | 3.68573400  | 0.13747000  |

|   |             |             |             |
|---|-------------|-------------|-------------|
| C | 1.27963000  | 4.76695800  | -0.64511400 |
| C | 2.46480500  | 4.69853400  | -1.38991600 |
| C | 3.26466000  | 3.54971400  | -1.36157600 |
| C | 2.85925600  | 2.47246300  | -0.57830500 |
| H | -0.05862300 | 3.73419300  | 0.71043500  |
| H | 2.76871900  | 5.54836300  | -1.99491900 |
| H | 4.18621000  | 3.50553100  | -1.93619300 |
| H | 4.50710100  | -2.37320300 | 0.88897400  |
| H | 0.67755600  | 5.67105400  | -0.67854400 |
| H | 0.96025500  | 1.20946900  | 1.82769500  |
| N | 6.23792700  | -1.28942000 | -0.80061800 |
| O | 6.93560100  | -0.64476200 | -1.58619200 |
| O | 6.51832700  | -2.41686800 | -0.38808200 |

### cat1/b9

|   |             |             |             |
|---|-------------|-------------|-------------|
| C | 1.43792400  | 2.32649400  | -1.69286700 |
| C | 2.16268400  | 3.57255900  | -1.72111200 |
| C | 3.29913600  | 3.37646900  | -0.99517100 |
| C | 3.26780600  | 2.00697500  | -0.54046700 |
| N | 2.11894800  | 1.39241000  | -0.96699700 |
| H | 1.82965100  | 4.46743100  | -2.23037100 |
| H | 4.10025600  | 4.07526300  | -0.79149000 |
| C | 3.79445900  | -2.03418100 | 0.85535100  |
| C | 5.10565500  | -1.86351000 | 1.43852500  |
| C | 5.44027900  | -0.55602600 | 1.26272100  |
| C | 4.33543800  | 0.06014700  | 0.56390300  |
| N | 3.35203700  | -0.85691000 | 0.32347000  |
| H | 5.67521100  | -2.64915200 | 1.91790200  |
| H | 6.34439100  | -0.04264800 | 1.56358200  |
| C | -1.17869900 | -1.08552400 | -1.72940800 |
| C | -2.21960600 | -0.51474100 | -2.55225200 |
| C | -1.81547800 | 0.74472600  | -2.87152500 |
| C | -0.53731200 | 0.94223300  | -2.23204400 |
| N | -0.16820600 | -0.17983400 | -1.53587600 |
| H | -3.13116500 | -1.02596100 | -2.83241500 |
| H | -2.32467100 | 1.48958100  | -3.46788500 |
| C | -0.15253400 | -3.01191000 | -0.55772900 |
| C | -0.17705600 | -4.38588600 | -0.11492100 |
| C | 1.03394500  | -4.62795300 | 0.45953800  |
| C | 1.78458000  | -3.39725700 | 0.37377000  |
| N | 1.04132200  | -2.42932300 | -0.24816600 |
| H | -1.01349100 | -5.06045600 | -0.24477900 |
| H | 1.40058600  | -5.54452400 | 0.90332500  |
| C | 0.20232500  | 2.11520200  | -2.29921600 |

|    |             |             |             |
|----|-------------|-------------|-------------|
| C  | 3.07026600  | -3.22216500 | 0.87075200  |
| C  | 4.28833500  | 1.39630900  | 0.17988700  |
| C  | -1.19492100 | -2.38489100 | -1.23740300 |
| H  | 5.14216800  | 2.01453800  | 0.44167100  |
| H  | 3.54300200  | -4.08388200 | 1.33285500  |
| H  | -2.08538500 | -2.97527900 | -1.42927900 |
| H  | -0.22902500 | 2.94313100  | -2.85117400 |
| Fe | 1.56171600  | -0.49828800 | -0.56630600 |
| Cl | 2.54092600  | -1.16640000 | -2.58011400 |
| O  | 1.01667000  | -0.09233600 | 1.00836100  |
| H  | 0.04440200  | 0.63221600  | 1.14381800  |
| C  | -2.60513700 | 4.25206800  | -0.95750300 |
| C  | -1.35626000 | 4.51294000  | -0.38207300 |
| C  | -0.74924300 | 3.58875600  | 0.47574100  |
| C  | -1.40520800 | 2.39040500  | 0.77670200  |
| C  | -2.65082100 | 2.12083500  | 0.15208700  |
| C  | -3.25489400 | 3.04193800  | -0.70146500 |
| H  | -3.06269500 | 4.98448900  | -1.61686400 |
| H  | -0.84088100 | 5.44201600  | -0.61066200 |
| H  | 0.24020400  | 3.79677900  | 0.86199500  |
| H  | -4.21236100 | 2.81874300  | -1.16467400 |
| C  | -1.01368300 | 1.24185900  | 1.64844100  |
| C  | -2.08022100 | 0.22613100  | 1.38938100  |
| C  | -2.14755400 | -1.12754600 | 1.73532500  |
| C  | -3.19612600 | -1.91294300 | 1.25612700  |
| C  | -4.16453900 | -1.33981400 | 0.42694600  |
| C  | -4.11505600 | 0.00123900  | 0.04196900  |
| C  | -3.05871200 | 0.76853100  | 0.51485300  |
| H  | -1.36410200 | -1.59302900 | 2.31741800  |
| H  | -3.25639100 | -2.96818800 | 1.49025500  |
| H  | -4.85917700 | 0.39469500  | -0.63940800 |
| C  | -0.53095300 | 1.53025700  | 3.10517100  |
| C  | -1.63027800 | 2.33845700  | 3.83183200  |
| H  | -1.33057100 | 2.53235700  | 4.86903700  |
| H  | -1.80764000 | 3.30101400  | 3.34113100  |
| H  | -2.57622000 | 1.78470700  | 3.84954800  |
| C  | 0.78618700  | 2.33720500  | 3.10354400  |
| H  | 1.53954900  | 1.85128800  | 2.47571500  |
| H  | 0.64027100  | 3.36307000  | 2.75701800  |
| H  | 1.17661600  | 2.40023700  | 4.12592400  |
| C  | -0.27768300 | 0.22691000  | 3.88987300  |
| H  | 0.15552200  | 0.47141600  | 4.86663500  |
| H  | -1.20621700 | -0.31982800 | 4.07785900  |
| H  | 0.42245600  | -0.42270800 | 3.35634600  |

|   |             |             |             |
|---|-------------|-------------|-------------|
| N | -5.20864200 | -2.19691600 | -0.13881000 |
| O | -6.05416600 | -1.67165200 | -0.86720300 |
| O | -5.17314700 | -3.40161200 | 0.12556900  |

**cat1/b10**

|    |             |             |             |
|----|-------------|-------------|-------------|
| C  | 1.30141200  | 1.62963500  | -2.53856800 |
| C  | 2.04631400  | 2.77797700  | -2.99384300 |
| C  | 3.26647400  | 2.71031700  | -2.39343800 |
| C  | 3.25624000  | 1.52443800  | -1.56865900 |
| N  | 2.05525700  | 0.88641200  | -1.66729900 |
| H  | 1.67020900  | 3.52051100  | -3.68520200 |
| H  | 4.10623900  | 3.38631800  | -2.48988800 |
| C  | 3.73253500  | -1.80574100 | 1.11220800  |
| C  | 5.09765700  | -1.54078500 | 1.50812200  |
| C  | 5.48841100  | -0.42815200 | 0.82964300  |
| C  | 4.35909400  | -0.01939500 | 0.02592100  |
| N  | 3.30824200  | -0.88024300 | 0.20957400  |
| H  | 5.66359900  | -2.13870200 | 2.21072800  |
| H  | 6.44218000  | 0.08253700  | 0.85859100  |
| C  | -1.30984800 | -1.63867300 | -1.50228000 |
| C  | -2.36562000 | -1.32866300 | -2.43766900 |
| C  | -1.98877200 | -0.19240300 | -3.08450200 |
| C  | -0.70454700 | 0.18395100  | -2.54402900 |
| N  | -0.30488800 | -0.70022600 | -1.58550200 |
| H  | -3.27867700 | -1.89946000 | -2.54654300 |
| H  | -2.51854700 | 0.35870000  | -3.84992300 |
| C  | -0.28324100 | -3.07834100 | 0.22655100  |
| C  | -0.32606700 | -4.20992300 | 1.12144400  |
| C  | 0.88012600  | -4.24918700 | 1.75296800  |
| C  | 1.65144000  | -3.14295300 | 1.23820400  |
| N  | 0.91386600  | -2.43956900 | 0.31551800  |
| H  | -1.17158900 | -4.87656600 | 1.23127400  |
| H  | 1.23478000  | -4.95823300 | 2.48979800  |
| C  | 0.01970000  | 1.30475200  | -2.95176000 |
| C  | 2.95664700  | -2.85692700 | 1.60335000  |
| C  | 4.33488300  | 1.09920000  | -0.79173400 |
| C  | -1.32236500 | -2.71650100 | -0.63623900 |
| H  | 5.23627600  | 1.70375700  | -0.83073800 |
| H  | 3.42112600  | -3.51334300 | 2.33336100  |
| H  | -2.20824300 | -3.34383900 | -0.63276400 |
| H  | -0.46061500 | 1.97266500  | -3.65857200 |
| Fe | 1.46974500  | -0.74614400 | -0.63974200 |
| Cl | 2.30094900  | -2.07210500 | -2.37671500 |
| O  | 1.05410800  | 0.19751100  | 0.71060500  |

|   |             |             |             |
|---|-------------|-------------|-------------|
| H | 0.02731300  | 0.87492200  | 0.79667400  |
| C | -2.28466500 | 3.96674900  | -2.04138800 |
| C | -1.11205200 | 4.37474500  | -1.38681900 |
| C | -0.61968200 | 3.66349600  | -0.28935800 |
| C | -1.31783500 | 2.53895100  | 0.15515700  |
| C | -2.48926400 | 2.11642500  | -0.52143000 |
| C | -2.97734000 | 2.83005900  | -1.61717800 |
| H | -2.65467500 | 4.53843500  | -2.88827200 |
| H | 0.29202700  | 3.97405900  | 0.21244200  |
| H | -3.87985300 | 2.50790700  | -2.12990800 |
| C | -0.99149100 | 1.58990900  | 1.24618800  |
| C | -2.08898900 | 0.58640900  | 1.19774500  |
| C | -2.29074300 | -0.56078500 | 1.96548400  |
| C | -3.33537900 | -1.42372300 | 1.63674100  |
| C | -4.16917300 | -1.11487000 | 0.55521300  |
| C | -4.01568400 | 0.04884600  | -0.20267000 |
| C | -2.96341900 | 0.89416600  | 0.12149700  |
| H | -1.62972200 | -0.79549600 | 2.79253700  |
| H | -4.68121000 | 0.24233400  | -1.03404900 |
| C | -0.47669100 | 2.06982600  | 2.56892600  |
| C | 0.26803700  | 1.21558300  | 3.40205200  |
| C | -0.75949700 | 3.36915900  | 3.02207900  |
| C | 0.70356400  | 1.64721300  | 4.65393000  |
| H | 0.53591600  | 0.22818100  | 3.04242300  |
| C | -0.32027000 | 3.79900200  | 4.27438600  |
| H | -1.33911700 | 4.03851200  | 2.39383000  |
| C | 0.41121300  | 2.93967500  | 5.09677700  |
| H | 1.28266700  | 0.97450500  | 5.28130300  |
| H | -0.55561600 | 4.80597000  | 4.60928500  |
| H | -0.58006900 | 5.25490000  | -1.73770600 |
| H | -3.50256000 | -2.34065600 | 2.18752500  |
| H | 0.75406900  | 3.27528100  | 6.07187200  |
| N | -5.17874400 | -2.08926500 | 0.14413800  |
| O | -5.84617500 | -1.83879900 | -0.86457400 |
| O | -5.29020900 | -3.12473500 | 0.80600000  |

**cat1/b11**

|   |             |             |            |
|---|-------------|-------------|------------|
| C | 0.60600000  | -2.43862500 | 1.58994100 |
| C | 1.30424800  | -2.56840500 | 2.84516900 |
| C | 0.82032700  | -1.59355400 | 3.66611700 |
| C | -0.15356200 | -0.85400800 | 2.90150800 |
| N | -0.26542000 | -1.38321600 | 1.64066200 |
| H | 2.04868000  | -3.32431200 | 3.05929700 |
| H | 1.08864200  | -1.37938100 | 4.69266800 |



|    |             |             |             |
|----|-------------|-------------|-------------|
| C  | -2.92315200 | 1.76462500  | 0.92871400  |
| C  | -3.10751900 | 2.69266700  | 2.01703600  |
| C  | -2.37291100 | 2.22144800  | 3.06408300  |
| C  | -1.72164100 | 1.01941100  | 2.60562200  |
| N  | -2.06530700 | 0.76359700  | 1.30197800  |
| H  | -3.73721900 | 3.57195800  | 1.97481400  |
| H  | -2.26923000 | 2.63615600  | 4.05853600  |
| C  | -1.58120000 | -2.83992300 | -2.08898100 |
| C  | -0.91141100 | -4.02623600 | -2.57249600 |
| C  | 0.06458700  | -4.31894500 | -1.67154100 |
| C  | -0.02545100 | -3.32487500 | -0.62606100 |
| N  | -1.03052800 | -2.43965700 | -0.90362400 |
| H  | -1.16362300 | -4.54397500 | -3.48889600 |
| H  | 0.77826300  | -5.13248600 | -1.68666300 |
| C  | -3.16354800 | -0.97119200 | -2.37874000 |
| C  | -4.12671300 | -0.22967700 | -3.16103400 |
| C  | -4.37001500 | 0.92687600  | -2.48761000 |
| C  | -3.57318800 | 0.87984000  | -1.28263500 |
| N  | -2.85200900 | -0.28073000 | -1.24056600 |
| H  | -4.54027700 | -0.56328900 | -4.10394700 |
| H  | -5.03228100 | 1.73981700  | -2.75593000 |
| C  | 0.75749700  | -3.31325000 | 0.51954100  |
| C  | -3.58761100 | 1.84938600  | -0.28942300 |
| C  | -0.84128400 | 0.25994100  | 3.36476100  |
| C  | -2.59802100 | -2.17891800 | -2.76570000 |
| H  | -0.66012000 | 0.57318500  | 4.38807400  |
| H  | -4.22079700 | 2.71651200  | -0.44905000 |
| H  | -2.94206300 | -2.61519200 | -3.69825500 |
| H  | 1.50939400  | -4.09019800 | 0.61677700  |
| Fe | -1.51587800 | -0.80575600 | 0.17694200  |
| Cl | -3.19978800 | -2.06779800 | 1.16666500  |
| O  | -0.35417500 | 0.03059300  | -0.67642700 |
| H  | 0.39108900  | 0.86480300  | 0.05656700  |
| C  | 4.90925700  | -0.19148500 | -0.30503500 |
| C  | 4.34629200  | 0.70848700  | -1.21069500 |
| C  | 3.08138500  | 0.10586200  | 1.20834900  |
| C  | 4.28852900  | -0.50736800 | 0.90531100  |
| H  | 4.86303200  | 0.91787500  | -2.14012900 |
| C  | 1.18812100  | 1.64352900  | 0.61189100  |
| C  | 2.49336100  | 1.02104500  | 0.31835100  |
| C  | 3.12877400  | 1.31065700  | -0.90930200 |
| C  | 2.43542100  | 2.22345500  | -1.89625100 |
| H  | 0.87718800  | 1.56968100  | 1.65677500  |
| H  | 3.16532000  | 2.69757600  | -2.56242300 |

|   |             |             |             |
|---|-------------|-------------|-------------|
| H | 1.79807400  | 1.59294600  | -2.53890500 |
| H | 2.57794600  | -0.12838300 | 2.14054300  |
| C | 0.91916300  | 2.94877500  | -0.02031600 |
| C | 0.01864500  | 3.86386500  | 0.55097000  |
| C | -0.23557500 | 5.08386300  | -0.06729700 |
| C | 0.40713200  | 5.40260500  | -1.26866100 |
| C | 1.29322100  | 4.49156600  | -1.84947100 |
| C | 1.54870900  | 3.26115500  | -1.24395000 |
| H | -0.47845900 | 3.60630000  | 1.48173200  |
| H | -0.92879300 | 5.78755800  | 0.38545700  |
| H | 0.21838900  | 6.35692500  | -1.75266600 |
| H | 1.78687300  | 4.73904800  | -2.78647300 |
| H | 4.75578000  | -1.21359100 | 1.57998700  |
| N | 6.18840200  | -0.82884800 | -0.63778900 |
| O | 6.65226800  | -1.63912500 | 0.16711100  |
| O | 6.72568700  | -0.52033100 | -1.70309700 |

**cat1/b12**

|   |             |             |             |
|---|-------------|-------------|-------------|
| C | -3.54399200 | 1.07399500  | -1.38281300 |
| C | -4.27615300 | 1.17484900  | -2.62513800 |
| C | -4.02932900 | 0.03028800  | -3.31632200 |
| C | -3.13620300 | -0.76251400 | -2.50152900 |
| N | -2.86148800 | -0.10990800 | -1.33214300 |
| H | -4.89837500 | 2.01484300  | -2.90578700 |
| H | -4.40144500 | -0.26739800 | -4.28809600 |
| C | -0.32455800 | -3.37757900 | -0.56827300 |
| C | -0.25787200 | -4.37743300 | -1.61017000 |
| C | -1.12178800 | -3.98340200 | -2.58322100 |
| C | -1.70510600 | -2.73666200 | -2.14098200 |
| N | -1.20795100 | -2.39265500 | -0.91475300 |
| H | 0.36696900  | -5.26049700 | -1.57560200 |
| H | -1.35431700 | -4.47174400 | -3.52071700 |
| C | -1.74977700 | 1.16104800  | 2.53708200  |
| C | -2.35191500 | 2.39546900  | 2.97680800  |
| C | -3.08105700 | 2.87061900  | 1.92740900  |
| C | -2.93075900 | 1.92051500  | 0.85267100  |
| N | -2.10826400 | 0.89544000  | 1.23987200  |
| H | -2.22718700 | 2.82376800  | 3.96304400  |
| H | -3.68281600 | 3.76879400  | 1.87419200  |
| C | -0.32602700 | -0.81569600 | 2.90004300  |
| C | 0.54333400  | -1.62701200 | 3.71593100  |
| C | 0.92043400  | -2.68966000 | 2.94923500  |
| C | 0.27333200  | -2.52943900 | 1.67017600  |
| N | -0.46962900 | -1.37800600 | 1.65701600  |

|    |             |             |             |
|----|-------------|-------------|-------------|
| H  | 0.81361100  | -1.40192900 | 4.73960300  |
| H  | 1.56257700  | -3.51988200 | 3.21388200  |
| C  | -3.56966100 | 2.02824800  | -0.37669400 |
| C  | 0.37681600  | -3.44100200 | 0.62644900  |
| C  | -2.61635300 | -1.99315200 | -2.87796900 |
| C  | -0.91608200 | 0.37054200  | 3.31741900  |
| H  | -2.92616300 | -2.39342000 | -3.83822300 |
| H  | 1.02848700  | -4.29598600 | 0.77710300  |
| H  | -0.71680100 | 0.70042200  | 4.33214700  |
| H  | -4.17414200 | 2.91399200  | -0.54543500 |
| Fe | -1.61416600 | -0.71553200 | 0.13841200  |
| Cl | -3.42365800 | -1.85152100 | 1.06981200  |
| O  | -0.36981300 | 0.03895800  | -0.66316400 |
| H  | 0.48520400  | 0.82521600  | 0.07976400  |
| C  | 4.94535400  | -0.48810200 | -0.29966100 |
| C  | 4.60037400  | 0.65906600  | -1.00463600 |
| C  | 2.99664700  | -0.31305600 | 1.08058300  |
| C  | 4.16244200  | -0.98584100 | 0.74758300  |
| H  | 5.22439500  | 1.03446800  | -1.80487600 |
| H  | 4.47336400  | -1.88117500 | 1.27018400  |
| C  | 1.31700400  | 1.51994700  | 0.65394200  |
| C  | 2.59892800  | 0.84502800  | 0.39123400  |
| C  | 3.42514300  | 1.31571200  | -0.64863600 |
| H  | 0.96166300  | 1.43944300  | 1.68627900  |
| H  | 2.36931000  | -0.68444000 | 1.88317900  |
| C  | 1.19431300  | 2.86226700  | 0.05919200  |
| C  | 0.16813600  | 3.75495900  | 0.41080500  |
| C  | 0.04095200  | 4.98255200  | -0.22714700 |
| C  | 0.93955800  | 5.34312900  | -1.24318000 |
| C  | 1.96655700  | 4.47912700  | -1.61026500 |
| C  | 2.08446000  | 3.25105000  | -0.95867900 |
| H  | -0.52937900 | 3.46536100  | 1.19009800  |
| H  | -0.75840900 | 5.66013300  | 0.05804600  |
| H  | 0.83973200  | 6.30062500  | -1.74595300 |
| H  | 2.68178500  | 4.73271200  | -2.38563000 |
| O  | 3.12513900  | 2.44675100  | -1.35926400 |
| N  | 6.17996000  | -1.19574700 | -0.66857300 |
| O  | 6.85392500  | -0.73168300 | -1.58834800 |
| O  | 6.46588500  | -2.21210600 | -0.03424200 |

**cat1/b13**

|   |             |            |            |
|---|-------------|------------|------------|
| C | -2.03853100 | 0.90540400 | 2.77414500 |
| C | -2.51730400 | 2.09936300 | 3.42484200 |
| C | -3.06348900 | 2.88458700 | 2.45454600 |

|    |             |             |             |
|----|-------------|-------------|-------------|
| C  | -2.94436100 | 2.15839600  | 1.21397400  |
| N  | -2.30002700 | 0.96606300  | 1.42958600  |
| H  | -2.43303800 | 2.29645500  | 4.48580400  |
| H  | -3.53082600 | 3.85575600  | 2.55493700  |
| C  | -3.27673000 | 0.19142000  | -2.59341100 |
| C  | -4.05646100 | 1.21115500  | -3.25676800 |
| C  | -4.19260300 | 2.23759400  | -2.37413000 |
| C  | -3.51807800 | 1.83489900  | -1.16140900 |
| N  | -2.97267000 | 0.59142000  | -1.32045500 |
| H  | -4.42895800 | 1.13656100  | -4.27027900 |
| H  | -4.70952000 | 3.17936800  | -2.50634700 |
| C  | -0.10323700 | -2.57789000 | 1.19000500  |
| C  | 0.45077300  | -3.05987200 | 2.43093800  |
| C  | 0.01049400  | -2.22095800 | 3.41185000  |
| C  | -0.79045700 | -1.21064900 | 2.76713500  |
| N  | -0.84153000 | -1.44515500 | 1.41438200  |
| H  | 1.07406500  | -3.93993100 | 2.52422700  |
| H  | 0.20379500  | -2.26538900 | 4.47599200  |
| C  | -0.62859700 | -2.88712100 | -1.19742200 |
| C  | -0.57485000 | -3.64966100 | -2.42370300 |
| C  | -1.43022000 | -3.04954200 | -3.29455200 |
| C  | -1.98630700 | -1.90421100 | -2.61045100 |
| N  | -1.48984600 | -1.83314800 | -1.33861600 |
| H  | 0.03209100  | -4.53354000 | -2.57148300 |
| H  | -1.66688300 | -3.33090500 | -4.31254500 |
| C  | -1.36173400 | -0.12475900 | 3.41430500  |
| C  | -2.84921100 | -0.98490700 | -3.19135800 |
| C  | -3.47854400 | 2.58521600  | 0.00578100  |
| C  | 0.04480100  | -3.22218100 | -0.03245600 |
| H  | -3.95999300 | 3.55799200  | -0.00932700 |
| H  | -3.16735600 | -1.17253800 | -4.21189000 |
| H  | 0.68322300  | -4.09956000 | -0.05862300 |
| H  | -1.23566700 | -0.05411400 | 4.48982800  |
| Fe | -1.86473200 | -0.40705100 | 0.03726600  |
| Cl | -3.77497000 | -1.57653700 | 0.61320200  |
| O  | -0.52833000 | 0.42336900  | -0.53176700 |
| C  | 4.82441400  | 2.71036500  | -2.04176600 |
| C  | 5.27240200  | 1.53644400  | -1.47489500 |
| C  | 4.46831900  | 0.84718200  | -0.52862800 |
| C  | 3.19627900  | 1.41473200  | -0.16299900 |
| C  | 2.74296600  | 2.61171200  | -0.79488400 |
| C  | 3.56132700  | 3.23983700  | -1.71510800 |
| C  | 4.84329300  | -0.36914300 | 0.12891800  |
| C  | 2.38207500  | 0.78135100  | 0.83877600  |

|   |             |             |             |
|---|-------------|-------------|-------------|
| C | 2.81165300  | -0.40791200 | 1.42775400  |
| C | 4.04116600  | -0.97106200 | 1.08411900  |
| C | 1.09590200  | 1.36152200  | 1.21585700  |
| C | 0.92707900  | 2.84515600  | 0.94656400  |
| C | 1.36028700  | 3.15054300  | -0.49066800 |
| H | 1.32678400  | 4.22747100  | -0.69041700 |
| H | -0.11542900 | 3.13860900  | 1.10609200  |
| H | 5.45412800  | 3.23020000  | -2.75850300 |
| H | 6.23421500  | 1.13247300  | -1.75304300 |
| H | 3.22215100  | 4.15572000  | -2.19289400 |
| H | 4.38333800  | -1.88427100 | 1.55493000  |
| H | 2.18422600  | -0.89711100 | 2.16606500  |
| H | 0.29407000  | 0.82218800  | 0.42910700  |
| H | 0.72110900  | 1.01892800  | 2.18265400  |
| N | 6.09763000  | -1.07512600 | -0.17372800 |
| O | 6.58333700  | -0.96681500 | -1.30191200 |
| O | 6.58483500  | -1.77023100 | 0.72076800  |
| H | 0.64011900  | 2.67301400  | -1.17062800 |
| H | 1.54313900  | 3.41606200  | 1.65867500  |

**cat1/b14**

|   |             |             |             |
|---|-------------|-------------|-------------|
| C | 2.78830000  | 1.47484400  | -1.25645600 |
| C | 3.63746900  | 2.55267500  | -0.81281700 |
| C | 3.86561700  | 2.34682400  | 0.51482400  |
| C | 3.18551700  | 1.12311000  | 0.86586500  |
| N | 2.52474700  | 0.61812100  | -0.22480900 |
| H | 3.98750000  | 3.36047400  | -1.44234000 |
| H | 4.45534100  | 2.94207900  | 1.19981500  |
| C | 1.86321800  | -2.72961300 | 2.24759300  |
| C | 2.41455100  | -2.65014000 | 3.58093800  |
| C | 2.97214900  | -1.41343700 | 3.69846200  |
| C | 2.77963900  | -0.75309700 | 2.42764300  |
| N | 2.10537200  | -1.56899400 | 1.56541300  |
| H | 2.36241500  | -3.44095200 | 4.31804200  |
| H | 3.48284400  | -0.97963100 | 4.54854100  |
| C | 0.01641500  | -1.34159000 | -2.93427100 |
| C | -0.17297900 | -0.68620500 | -4.20679700 |
| C | 0.64229300  | 0.40502600  | -4.20937200 |
| C | 1.31128400  | 0.42153500  | -2.93191300 |
| N | 0.90782600  | -0.63970300 | -2.16791800 |
| H | -0.83324500 | -1.03838500 | -4.98879400 |
| H | 0.78171200  | 1.14441900  | -4.98667500 |
| C | -0.33309000 | -3.26281100 | -1.40861700 |
| C | -0.89582400 | -4.55984400 | -1.10298400 |

|    |             |             |             |
|----|-------------|-------------|-------------|
| C  | -0.37864600 | -4.93258800 | 0.09840500  |
| C  | 0.48095500  | -3.85243100 | 0.53112700  |
| N  | 0.50031100  | -2.85753000 | -0.40362200 |
| H  | -1.58520300 | -5.09930600 | -1.73951300 |
| H  | -0.55928000 | -5.83988300 | 0.66015800  |
| C  | 2.22204300  | 1.38773800  | -2.52475000 |
| C  | 1.13743800  | -3.80873600 | 1.75675700  |
| C  | 3.25883400  | 0.51547800  | 2.11319500  |
| C  | -0.58114300 | -2.54726200 | -2.57365000 |
| H  | 3.78840400  | 1.05260100  | 2.89412800  |
| H  | 1.02943100  | -4.67105600 | 2.40781900  |
| H  | -1.26896000 | -2.98920300 | -3.28867300 |
| H  | 2.47357900  | 2.16539800  | -3.23754400 |
| Fe | 1.48050000  | -1.08479300 | -0.29876000 |
| Cl | 3.35850900  | -2.18138000 | -1.14669900 |
| O  | 0.05427800  | -0.47771500 | 0.40929400  |
| H  | -0.34178000 | 0.70092400  | 0.23026200  |
| C  | -1.54201800 | 3.37031700  | -3.09503900 |
| C  | -0.40301700 | 4.17827300  | -3.15515700 |
| C  | 0.49215300  | 4.17084600  | -2.08422200 |
| C  | 0.25393300  | 3.36563500  | -0.97255200 |
| C  | -0.90297900 | 2.56186400  | -0.88241100 |
| C  | -1.79161000 | 2.57857500  | -1.97636600 |
| H  | -2.25199200 | 3.36804800  | -3.91777500 |
| H  | -0.21849300 | 4.80475600  | -4.02358300 |
| H  | 1.38878600  | 4.78475900  | -2.11396800 |
| H  | 0.96898000  | 3.35888200  | -0.15769800 |
| H  | -2.69867400 | 1.98680500  | -1.94341500 |
| C  | -1.13186400 | 1.73808600  | 0.34450600  |
| C  | -2.43278000 | 0.98079000  | 0.42704900  |
| C  | -3.39261500 | 1.26894300  | 1.41088600  |
| C  | -2.69153700 | -0.06816900 | -0.47925400 |
| C  | -4.58440100 | 0.55248200  | 1.48157000  |
| H  | -3.20454900 | 2.06357100  | 2.12444200  |
| C  | -3.87260400 | -0.79350300 | -0.41989100 |
| H  | -1.93974600 | -0.32802000 | -1.21485300 |
| C  | -4.80992600 | -0.47141100 | 0.56363200  |
| H  | -5.33399500 | 0.77329500  | 2.23143100  |
| H  | -4.07234500 | -1.60805700 | -1.10486700 |
| C  | -0.68719600 | 2.35422000  | 1.65123700  |
| C  | -0.13636600 | 1.54463000  | 2.66024700  |
| C  | -0.85652500 | 3.72522600  | 1.91045900  |
| C  | 0.24764200  | 2.09462800  | 3.88253600  |
| H  | 0.00624700  | 0.48747600  | 2.46518700  |

|   |             |             |             |
|---|-------------|-------------|-------------|
| C | -0.48216500 | 4.27123000  | 3.13870700  |
| H | -1.28762700 | 4.36313300  | 1.14470100  |
| C | 0.07652100  | 3.45892800  | 4.12846800  |
| H | 0.68622100  | 1.45153600  | 4.64141100  |
| H | -0.62925400 | 5.33246200  | 3.32181600  |
| H | 0.37387800  | 3.88645800  | 5.08239000  |
| N | -6.06147900 | -1.23601100 | 0.63550800  |
| O | -6.86632000 | -0.94050000 | 1.52012100  |
| O | -6.23613200 | -2.12954600 | -0.19520800 |

**cat1/b15**

|    |            |             |             |
|----|------------|-------------|-------------|
| C  | 3.14778200 | -1.10565800 | 2.37043000  |
| C  | 3.65286700 | -2.32245800 | 2.95911500  |
| C  | 4.01135900 | -3.13440800 | 1.92700800  |
| C  | 3.72425500 | -2.41121200 | 0.71037400  |
| N  | 3.20000300 | -1.18022800 | 1.00853800  |
| H  | 3.71597500 | -2.50910100 | 4.02321000  |
| H  | 4.43546500 | -4.12961200 | 1.96392300  |
| C  | 3.07385100 | -0.69457600 | -3.17940000 |
| C  | 3.53868000 | -1.82064300 | -3.95648500 |
| C  | 3.92152200 | -2.77639700 | -3.06796900 |
| C  | 3.68908100 | -2.23331500 | -1.74911500 |
| N  | 3.17770800 | -0.96925900 | -1.84229300 |
| H  | 3.56212800 | -1.85312500 | -5.03811700 |
| H  | 4.32583100 | -3.76096500 | -3.26467100 |
| C  | 1.61336400 | 2.71476900  | 1.11595400  |
| C  | 1.38551400 | 3.25446100  | 2.43361000  |
| C  | 1.73612000 | 2.28376100  | 3.32111500  |
| C  | 2.18130200 | 1.15252600  | 2.54688500  |
| N  | 2.07823400 | 1.42534700  | 1.20553700  |
| H  | 1.01124300 | 4.25061800  | 2.63111200  |
| H  | 1.70706200 | 2.31046800  | 4.40225000  |
| C  | 1.61753200 | 2.91693800  | -1.33914200 |
| C  | 1.37779100 | 3.65404200  | -2.55652500 |
| C  | 1.70912200 | 2.82521700  | -3.58523600 |
| C  | 2.15670000 | 1.58740400  | -2.99314400 |
| N  | 2.08728400 | 1.66558700  | -1.62757800 |
| H  | 1.01232700 | 4.67203000  | -2.59660400 |
| H  | 1.67032800 | 3.01882000  | -4.64944300 |
| C  | 2.65852400 | -0.02657400 | 3.09558400  |
| C  | 2.60223900 | 0.49149400  | -3.72076100 |
| C  | 3.95014400 | -2.90845600 | -0.56439500 |
| C  | 1.38511500 | 3.41152200  | -0.06216100 |
| Fe | 2.57841100 | 0.21559500  | -0.30561700 |

|    |             |             |             |
|----|-------------|-------------|-------------|
| C1 | 4.73179700  | 1.08730700  | -0.28080300 |
| O  | 1.09082400  | -0.53164900 | -0.48112400 |
| H  | 0.07390200  | -0.35552600 | 0.32935600  |
| C  | -1.06932600 | -0.34128300 | 0.89628700  |
| C  | -1.76229400 | -1.40386900 | 0.08596700  |
| C  | -2.50670200 | -2.44780500 | 0.65953400  |
| C  | -1.68945200 | -1.31999200 | -1.31943900 |
| C  | -3.19945300 | -3.35244800 | -0.13675500 |
| H  | -2.58479200 | -2.52002700 | 1.73781700  |
| C  | -2.36403600 | -2.22263900 | -2.12747600 |
| H  | -1.08640000 | -0.53816300 | -1.76715300 |
| C  | -3.12366300 | -3.22631400 | -1.52286000 |
| H  | -3.80840100 | -4.13601600 | 0.29618200  |
| H  | -2.31670500 | -2.16421000 | -3.20766700 |
| C  | -0.73175400 | -0.66367500 | 2.31629800  |
| C  | -0.08767000 | -1.87673400 | 2.62863100  |
| C  | -1.02957900 | 0.21986200  | 3.36836300  |
| C  | 0.18697300  | -2.22208700 | 3.94987900  |
| H  | 0.20197300  | -2.54210100 | 1.82053000  |
| C  | -0.74370900 | -0.12099300 | 4.69007500  |
| H  | -1.49843300 | 1.17238900  | 3.14295100  |
| C  | -0.14752000 | -1.34900300 | 4.98903700  |
| H  | 0.68151100  | -3.16537400 | 4.16393600  |
| H  | -0.99689300 | 0.57113900  | 5.48894500  |
| C  | -1.50545700 | 1.05157100  | 0.59604600  |
| C  | -2.74989600 | 1.47425800  | 0.24739000  |
| H  | -0.72020400 | 1.80060700  | 0.64900300  |
| C  | -3.95636900 | 0.60966600  | 0.37973500  |
| C  | -4.75623400 | 0.31710000  | -0.73579300 |
| C  | -4.31546300 | 0.07962500  | 1.62775400  |
| C  | -5.85937200 | -0.52573200 | -0.61428800 |
| H  | -4.48796800 | 0.73127600  | -1.70341800 |
| C  | -5.43488700 | -0.74363500 | 1.75454500  |
| H  | -3.70355700 | 0.30461400  | 2.49571700  |
| C  | -6.20295400 | -1.05791500 | 0.63227200  |
| H  | -6.45181300 | -0.76884600 | -1.49208300 |
| H  | -5.70005100 | -1.14689800 | 2.72832600  |
| H  | -7.06564300 | -1.71179900 | 0.72559900  |
| C  | -2.95661900 | 2.85894000  | -0.23381200 |
| C  | -4.11503300 | 3.57910300  | 0.11336000  |
| C  | -2.00187600 | 3.48248700  | -1.05920100 |
| C  | -4.29322200 | 4.89126300  | -0.31929400 |
| H  | -4.86797800 | 3.10370800  | 0.73492700  |
| C  | -2.18492800 | 4.79354100  | -1.49491900 |



|   |             |             |             |
|---|-------------|-------------|-------------|
| H | -1.13314100 | 2.92123600  | -1.38401600 |
| C | -3.32735000 | 5.50593300  | -1.12224400 |
| H | -5.18827900 | 5.43626700  | -0.03145200 |
| H | -1.44291800 | 5.25106800  | -2.14436300 |
| H | -3.47238700 | 6.52649500  | -1.46612300 |
| H | 0.06369400  | -1.61856300 | 6.02035600  |
| H | 4.36624100  | -3.90811500 | -0.64193400 |
| H | 2.58991700  | 0.57529000  | -4.80305900 |
| H | 0.99663100  | 4.42121600  | 0.02083800  |
| H | 2.64697700  | -0.11379800 | 4.17620600  |
| N | -3.87167400 | -4.16418900 | -2.36663100 |
| O | -3.80682500 | -4.01551300 | -3.58852400 |
| O | -4.52723500 | -5.04552300 | -1.80702700 |

**cat2/a1**

|   |             |             |             |
|---|-------------|-------------|-------------|
| C | 1.51361200  | -2.70170500 | 0.12655500  |
| C | 1.22697600  | -4.11261000 | 0.00165100  |
| C | -0.04465400 | -4.21243600 | -0.47771700 |
| C | -0.55333200 | -2.86576000 | -0.58573300 |
| N | 0.40817100  | -1.96600500 | -0.21182200 |
| H | 1.93046400  | -4.90445200 | 0.21628100  |
| H | -0.60442000 | -5.10310800 | -0.72541400 |
| C | -2.57828900 | 0.89832800  | -0.41339200 |
| C | -3.91021000 | 0.40927000  | -0.68888300 |
| C | -3.78693300 | -0.91319800 | -0.99721900 |
| C | -2.39081800 | -1.24481100 | -0.84381600 |
| N | -1.67706200 | -0.12531400 | -0.49356400 |
| H | -4.80475500 | 1.01488000  | -0.66654400 |
| H | -4.55972400 | -1.61736400 | -1.27173900 |
| C | 3.06030000  | 1.28840200  | -0.25674300 |
| C | 4.45332600  | 0.97070000  | -0.03156200 |
| C | 4.50114500  | -0.34473100 | 0.31595500  |
| C | 3.14271400  | -0.84004200 | 0.24919900  |
| N | 2.29075200  | 0.17026800  | -0.09180000 |
| H | 5.26563600  | 1.67941400  | -0.10876300 |
| H | 5.36293400  | -0.94499000 | 0.57081300  |
| C | 1.21293900  | 2.91048700  | -0.48516700 |
| C | 0.70479700  | 4.26530000  | -0.49489800 |
| C | -0.64247000 | 4.17637400  | -0.32257200 |
| C | -0.95922600 | 2.76534600  | -0.26091800 |
| N | 0.18554000  | 2.02276700  | -0.35734500 |
| H | 1.31624100  | 5.15031300  | -0.59901900 |
| H | -1.37120900 | 4.97284400  | -0.26993300 |
| C | 2.78461800  | -2.18653800 | 0.41737200  |

|    |             |             |             |
|----|-------------|-------------|-------------|
| C  | -2.26142700 | 2.25535400  | -0.21515700 |
| C  | -1.86801100 | -2.53802100 | -0.95128900 |
| C  | 2.57640700  | 2.57838100  | -0.50557100 |
| Fe | 0.29551300  | 0.02460600  | -0.23684300 |
| Cl | 0.55817000  | -0.03353500 | -2.59549400 |
| O  | 0.20358800  | 0.18908900  | 1.48876000  |
| H  | -0.52692800 | -0.60709600 | 2.02701700  |
| C  | -4.63168700 | 0.07768400  | 3.24846300  |
| C  | -4.46948800 | 0.65089400  | 4.51359800  |
| C  | -3.24540500 | 0.51825200  | 5.17848100  |
| C  | -2.19836300 | -0.18521200 | 4.58908900  |
| C  | -2.34895100 | -0.78296400 | 3.32016100  |
| C  | -3.58509600 | -0.62574900 | 2.65886100  |
| H  | -5.57260700 | 0.18730200  | 2.71560800  |
| H  | -3.10899400 | 0.96612200  | 6.15949900  |
| H  | -3.71228600 | -1.04959100 | 1.66893500  |
| C  | -1.24367900 | -1.49854700 | 2.68335000  |
| H  | -1.51728900 | -2.18986800 | 1.88844400  |
| H  | -0.48656000 | -1.90505000 | 3.35670800  |
| C  | -2.75164200 | -3.62078000 | -1.48419700 |
| C  | -3.45682400 | -4.47925500 | -0.61997500 |
| C  | -2.84928400 | -3.76645100 | -2.88408100 |
| C  | -4.25394300 | -5.48545000 | -1.17677000 |
| C  | -3.65462600 | -4.78854200 | -3.39459700 |
| C  | -4.36599800 | -5.65633100 | -2.55939400 |
| H  | -4.79959400 | -6.15197800 | -0.51183500 |
| H  | -3.72597900 | -4.91077600 | -4.47368500 |
| C  | 3.84299500  | -3.14552000 | 0.86264500  |
| C  | 4.69555600  | -3.75414800 | -0.07868300 |
| C  | 3.96202300  | -3.43401000 | 2.23556000  |
| C  | 5.66783700  | -4.64868900 | 0.37965700  |
| C  | 4.95025000  | -4.33215100 | 2.64988800  |
| C  | 5.81452200  | -4.94675300 | 1.73838300  |
| H  | 6.32594000  | -5.12588700 | -0.34388100 |
| H  | 5.04547500  | -4.55812400 | 3.71014900  |
| C  | 3.56561300  | 3.67315700  | -0.74697400 |
| C  | 3.97669700  | 3.93261200  | -2.06905800 |
| C  | 4.07171500  | 4.42681900  | 0.32853600  |
| C  | 4.89968700  | 4.95891800  | -2.29181000 |
| C  | 4.99386400  | 5.44336300  | 0.05915800  |
| C  | 5.41683600  | 5.72686000  | -1.24331600 |
| H  | 5.22296800  | 5.16258700  | -3.31082200 |
| H  | 5.39070500  | 6.02699100  | 0.88756000  |
| C  | -3.38588800 | 3.21763300  | -0.00178800 |

|   |             |             |             |
|---|-------------|-------------|-------------|
| C | -4.11111100 | 3.72999600  | -1.09515600 |
| C | -3.69552100 | 3.60634600  | 1.31726000  |
| C | -5.17278900 | 4.60498000  | -0.84304200 |
| C | -4.76939400 | 4.47849700  | 1.52099700  |
| C | -5.52539300 | 4.98072500  | 0.45716100  |
| H | -5.73446000 | 5.00623500  | -1.68435600 |
| H | -5.01707200 | 4.77646800  | 2.53802600  |
| C | -2.10653600 | -2.83073000 | -3.81055800 |
| H | -2.51486100 | -1.81445700 | -3.75501800 |
| H | -1.04790400 | -2.73834700 | -3.54443200 |
| H | -2.17664100 | -3.16840800 | -4.84905900 |
| C | -3.36209600 | -4.32428300 | 0.88093400  |
| H | -2.33166600 | -4.44904500 | 1.23345400  |
| H | -3.68816000 | -3.32888700 | 1.20349700  |
| H | -3.98528100 | -5.06271000 | 1.39429700  |
| C | -5.25305000 | -6.73229500 | -3.14155100 |
| H | -5.44414100 | -7.53175200 | -2.41787700 |
| H | -6.22640800 | -6.32181300 | -3.44183500 |
| H | -4.80361300 | -7.18227300 | -4.03397700 |
| C | -3.73761900 | 3.36008200  | -2.51317800 |
| H | -2.67335900 | 3.54193600  | -2.70276900 |
| H | -3.91115300 | 2.29610200  | -2.71219800 |
| H | -4.31843000 | 3.93916800  | -3.23748300 |
| C | -2.86267300 | 3.12232600  | 2.48191300  |
| H | -2.70578600 | 2.04034700  | 2.45370300  |
| H | -1.86795900 | 3.58558200  | 2.46561500  |
| H | -3.33717900 | 3.36688200  | 3.43601700  |
| C | -6.70433300 | 5.89216500  | 0.70807000  |
| H | -6.88200100 | 6.56286600  | -0.13959700 |
| H | -7.62457700 | 5.31299300  | 0.86357500  |
| H | -6.55334300 | 6.50693100  | 1.60218800  |
| C | 3.43159900  | 3.11184600  | -3.21541000 |
| H | 3.68260700  | 2.05055300  | -3.10350400 |
| H | 2.33726400  | 3.15748000  | -3.25848900 |
| H | 3.82886700  | 3.45897900  | -4.17407000 |
| C | 6.38659600  | 6.85339900  | -1.51595200 |
| H | 7.02568200  | 6.63269100  | -2.37796600 |
| H | 5.85361400  | 7.78778900  | -1.73770500 |
| H | 7.03375600  | 7.04481500  | -0.65315500 |
| C | 3.62514900  | 4.14095300  | 1.74422500  |
| H | 2.54387000  | 4.28678000  | 1.85606500  |
| H | 3.83137200  | 3.10128500  | 2.02515100  |
| H | 4.13262200  | 4.79531100  | 2.45948400  |
| C | 3.03023000  | -2.78926500 | 3.23692700  |

|   |             |             |             |
|---|-------------|-------------|-------------|
| H | 3.06174100  | -1.69553100 | 3.16733300  |
| H | 1.98893700  | -3.08133400 | 3.05228700  |
| H | 3.28834500  | -3.07650300 | 4.26077400  |
| C | 4.55470900  | -3.45144800 | -1.55297000 |
| H | 3.54031800  | -3.66690100 | -1.90860700 |
| H | 4.73894400  | -2.39077700 | -1.76109400 |
| H | 5.25848400  | -4.04220300 | -2.14700900 |
| C | 6.89781500  | -5.88865000 | 2.21064700  |
| H | 7.11192200  | -6.66085900 | 1.46366000  |
| H | 7.83568300  | -5.34870700 | 2.39808200  |
| H | 6.61760800  | -6.38763800 | 3.14462400  |
| H | -1.24781000 | -0.28158100 | 5.10828700  |
| H | -5.28518900 | 1.20169800  | 4.97406500  |

**cat2/a2**

|   |             |             |             |
|---|-------------|-------------|-------------|
| C | -1.24426100 | 2.67451500  | -0.32811500 |
| C | -1.07302900 | 4.10997500  | -0.39473500 |
| C | 0.26238800  | 4.33681900  | -0.52698600 |
| C | 0.90698000  | 3.04213300  | -0.49073200 |
| N | -0.02703200 | 2.05318400  | -0.38339900 |
| H | -1.88158300 | 4.82674000  | -0.37163500 |
| H | 0.78175700  | 5.27985400  | -0.62180700 |
| C | 3.21044000  | -0.49331400 | 0.25594500  |
| C | 4.51333900  | 0.13571500  | 0.30728100  |
| C | 4.32656100  | 1.44465400  | -0.01508700 |
| C | 2.90636000  | 1.62054900  | -0.22321200 |
| N | 2.25460500  | 0.42886000  | -0.05881600 |
| H | 5.43638100  | -0.37740700 | 0.53650200  |
| H | 5.06158900  | 2.23316500  | -0.09331000 |
| C | -2.24627900 | -1.46814900 | -0.88666800 |
| C | -3.66581500 | -1.28358900 | -1.07177200 |
| C | -3.92911300 | 0.02367900  | -0.79003300 |
| C | -2.65981500 | 0.65150900  | -0.49860700 |
| N | -1.65694200 | -0.27650300 | -0.54216100 |
| H | -4.35624400 | -2.06763400 | -1.34909600 |
| H | -4.88107800 | 0.53464300  | -0.79377500 |
| C | -0.26239000 | -2.89157700 | -0.55460700 |
| C | 0.36925200  | -4.18076400 | -0.40520800 |
| C | 1.62636000  | -3.94791900 | 0.06594200  |
| C | 1.78108500  | -2.51321200 | 0.14888000  |
| N | 0.60618200  | -1.89502900 | -0.20146200 |
| H | -0.10543800 | -5.12684200 | -0.62330600 |
| H | 2.39969000  | -4.66454200 | 0.30311800  |
| C | -2.48918700 | 2.03534800  | -0.31330000 |

|    |             |             |             |
|----|-------------|-------------|-------------|
| C  | 2.99950900  | -1.87259300 | 0.41092100  |
| C  | 2.29661400  | 2.85317400  | -0.48117900 |
| C  | -1.59603900 | -2.70419300 | -0.95158200 |
| Fe | 0.28554200  | 0.07580900  | -0.24643200 |
| Cl | 0.61251000  | 0.03627000  | -2.59597300 |
| O  | 0.13302300  | 0.22706000  | 1.47261300  |
| C  | 4.18416400  | -2.71830700 | 0.76334200  |
| C  | 4.55111400  | -2.87564700 | 2.11350100  |
| C  | 4.93882500  | -3.32415700 | -0.26152800 |
| C  | 5.66605600  | -3.66206000 | 2.42029800  |
| C  | 6.04714900  | -4.10055400 | 0.09120800  |
| C  | 6.42298900  | -4.28777800 | 1.42517300  |
| H  | 5.95203100  | -3.78481000 | 3.46312500  |
| H  | 6.63519500  | -4.56527700 | -0.69779800 |
| C  | -2.35623300 | -3.88173500 | -1.47554400 |
| C  | -3.02080100 | -4.76943700 | -0.60809000 |
| C  | -2.39130300 | -4.07740300 | -2.87190400 |
| C  | -3.71204300 | -5.85430200 | -1.15800200 |
| C  | -3.09279000 | -5.17661600 | -3.37608800 |
| C  | -3.75599300 | -6.07780500 | -2.53727800 |
| H  | -4.22961100 | -6.54070900 | -0.49071700 |
| H  | -3.12149700 | -5.33161400 | -4.45285500 |
| C  | -3.70926200 | 2.88504900  | -0.15032700 |
| C  | -4.08160100 | 3.28760200  | 1.14837200  |
| C  | -4.45718300 | 3.29097700  | -1.27360700 |
| C  | -5.23901300 | 4.05726900  | 1.30281900  |
| C  | -5.60294200 | 4.06666500  | -1.07054000 |
| C  | -6.01783400 | 4.44825200  | 0.20953100  |
| H  | -5.53432400 | 4.36412600  | 2.30433100  |
| H  | -6.18160000 | 4.38620600  | -1.93506700 |
| C  | 3.17301100  | 4.04140900  | -0.71661000 |
| C  | 3.58523300  | 4.84766900  | 0.36103700  |
| C  | 3.57895100  | 4.33156800  | -2.03371100 |
| C  | 4.40664800  | 5.94849400  | 0.09866200  |
| C  | 4.40005700  | 5.44282300  | -2.24978400 |
| C  | 4.82117600  | 6.26439600  | -1.19935600 |
| H  | 4.73137000  | 6.57307500  | 0.92869000  |
| H  | 4.71928600  | 5.67047700  | -3.26492600 |
| C  | -3.00398500 | -4.55590600 | 0.88839100  |
| H  | -1.98002600 | -4.52252600 | 1.27763900  |
| H  | -3.47814600 | -3.60635800 | 1.16347200  |
| H  | -3.53729400 | -5.35785800 | 1.40773600  |
| C  | -1.70029900 | -3.10769600 | -3.80333900 |
| H  | -2.18728900 | -2.12536100 | -3.78389600 |

|   |             |             |             |
|---|-------------|-------------|-------------|
| H | -0.65958900 | -2.92779200 | -3.51245100 |
| H | -1.71485200 | -3.47418600 | -4.83429900 |
| C | -4.47672600 | -7.27756900 | -3.10687700 |
| H | -4.91182900 | -7.05586100 | -4.08761400 |
| H | -3.78921100 | -8.12351400 | -3.24090400 |
| H | -5.28264100 | -7.61433400 | -2.44586200 |
| C | -4.01624900 | 2.92251400  | -2.67262800 |
| H | -2.96978700 | 3.20063800  | -2.84345100 |
| H | -4.08321600 | 1.84266700  | -2.84833100 |
| H | -4.63133300 | 3.42625100  | -3.42446500 |
| C | -3.22797700 | 2.93596400  | 2.34513000  |
| H | -2.94020600 | 1.88125800  | 2.35095900  |
| H | -2.29735100 | 3.51771600  | 2.34009400  |
| H | -3.75436000 | 3.14366900  | 3.28050900  |
| C | -7.28409500 | 5.24902500  | 0.40633100  |
| H | -8.15284300 | 4.58886700  | 0.53266600  |
| H | -7.22495100 | 5.88180800  | 1.29862400  |
| H | -7.48955300 | 5.89425500  | -0.45484600 |
| C | 3.13949100  | 3.45247100  | -3.18216900 |
| H | 3.49170700  | 2.42207300  | -3.05530000 |
| H | 2.04707000  | 3.38933600  | -3.24607600 |
| H | 3.51905800  | 3.82988600  | -4.13655200 |
| C | 3.15059600  | 4.52319500  | 1.77195700  |
| H | 2.05790400  | 4.53854300  | 1.86434500  |
| H | 3.47555400  | 3.51803700  | 2.06639500  |
| H | 3.56369400  | 5.23940900  | 2.48873900  |
| C | 5.67973700  | 7.47983300  | -1.46291600 |
| H | 6.30849100  | 7.34274200  | -2.34933300 |
| H | 5.06044700  | 8.36999800  | -1.63742500 |
| H | 6.33432600  | 7.70154100  | -0.61284300 |
| C | 4.56768900  | -3.12762800 | -1.71391700 |
| H | 3.59663000  | -3.58184200 | -1.94362900 |
| H | 4.47923300  | -2.06378300 | -1.96277500 |
| H | 5.31616500  | -3.57364700 | -2.37573700 |
| C | 3.76084100  | -2.19970800 | 3.21039000  |
| H | 3.73515700  | -1.11252800 | 3.07098200  |
| H | 2.71821100  | -2.53575600 | 3.21723000  |
| H | 4.19165400  | -2.40858200 | 4.19436400  |
| C | 7.60405000  | -5.16029300 | 1.78194800  |
| H | 7.29748000  | -6.20764000 | 1.90604200  |
| H | 8.37081900  | -5.13721400 | 0.99991400  |
| H | 8.06782400  | -4.84369900 | 2.72243900  |
| C | -4.57109300 | 0.43452700  | 4.52865700  |
| C | -3.31903700 | 0.37630700  | 5.14920200  |

|   |             |             |            |
|---|-------------|-------------|------------|
| C | -3.67436400 | -0.78647000 | 2.64433900 |
| C | -4.74230800 | -0.14844200 | 3.26983200 |
| H | -5.70680000 | -0.09900600 | 2.77118400 |
| C | -2.40895000 | -0.86935100 | 3.26168200 |
| C | -2.25118000 | -0.26485300 | 4.52481200 |
| C | -0.23090200 | -2.26314600 | 3.36470300 |
| C | -1.29967700 | -1.54322400 | 2.56409400 |
| H | 0.48373400  | -2.73438900 | 2.68413200 |
| H | -0.63383700 | -0.60643100 | 1.96658800 |
| H | -1.64108400 | -2.12186600 | 1.70711800 |
| H | -0.67130900 | -3.04554100 | 3.99902400 |
| H | -3.17490900 | 0.83477500  | 6.12424000 |
| H | 0.32781400  | -1.58004900 | 4.01326200 |
| H | -1.28366800 | -0.29523000 | 5.01666900 |
| H | -3.81107600 | -1.22327600 | 1.66025800 |
| H | -5.40176800 | 0.93560700  | 5.01840200 |

### cat2/a3

|   |             |             |             |
|---|-------------|-------------|-------------|
| C | 0.15494200  | -2.88792800 | -0.56046200 |
| C | -0.53339700 | -4.14890500 | -0.43680500 |
| C | -1.78060800 | -3.86932300 | 0.03513800  |
| C | -1.87188400 | -2.43129900 | 0.14602000  |
| N | -0.66675200 | -1.85881100 | -0.18456200 |
| H | -0.09906600 | -5.11052100 | -0.67146600 |
| H | -2.58753800 | -4.55428000 | 0.25340000  |
| C | -2.84033800 | 1.73107400  | -0.28324700 |
| C | -4.26490800 | 1.61507300  | -0.06074500 |
| C | -4.50136200 | 0.31970300  | 0.28434200  |
| C | -3.22604700 | -0.36239200 | 0.22967900  |
| N | -2.23747900 | 0.51563200  | -0.10902600 |
| H | -4.96855500 | 2.43132000  | -0.14283700 |
| H | -5.44209700 | -0.15165700 | 0.53093500  |
| C | 2.68293600  | 0.55575400  | -0.48529000 |
| C | 3.92703800  | -0.11818800 | -0.77922400 |
| C | 3.61643300  | -1.41342200 | -1.06793800 |
| C | 2.19344200  | -1.55070100 | -0.87510400 |
| N | 1.64829800  | -0.33995000 | -0.51760200 |
| H | 4.89579100  | 0.35988300  | -0.79278500 |
| H | 4.27714700  | -2.21763500 | -1.35897500 |
| C | 1.34618800  | 2.63409800  | -0.36741400 |
| C | 1.22731000  | 4.07438800  | -0.45212400 |
| C | -0.09757100 | 4.34717800  | -0.60200000 |
| C | -0.78938700 | 3.07633600  | -0.55928500 |
| N | 0.10888100  | 2.05715900  | -0.43286100 |

|    |             |             |             |
|----|-------------|-------------|-------------|
| H  | 2.06032000  | 4.76251300  | -0.42610000 |
| H  | -0.58186500 | 5.30722000  | -0.71104900 |
| C  | 1.49176600  | -2.75699600 | -0.96288700 |
| C  | -2.18444100 | 2.93792500  | -0.55265600 |
| C  | -3.06679600 | -1.74684500 | 0.39861400  |
| C  | 2.56505100  | 1.94774500  | -0.32925800 |
| Fe | -0.27100900 | 0.08379800  | -0.25750500 |
| Cl | -0.55744900 | 0.03373400  | -2.60380800 |
| O  | -0.16899300 | 0.37394000  | 1.45480300  |
| H  | 0.45081900  | -0.45549300 | 2.22581900  |
| C  | 3.96624900  | 0.29156900  | 4.86209200  |
| C  | 4.92934500  | -0.00550000 | 3.89649100  |
| C  | 4.53973800  | -0.65130600 | 2.71952700  |
| C  | 3.20770000  | -1.00326500 | 2.52428700  |
| C  | 2.22159400  | -0.72036400 | 3.48868600  |
| C  | 2.62833400  | -0.05166300 | 4.65726700  |
| H  | 4.25399100  | 0.79808600  | 5.77996600  |
| H  | 5.26741100  | -0.86760000 | 1.94237800  |
| H  | 2.91600300  | -1.47531300 | 1.59519700  |
| C  | 0.79935000  | -1.11490500 | 3.23746800  |
| C  | -4.28262300 | -2.55205300 | 0.74085700  |
| C  | -4.60328500 | -2.79530600 | 2.08940200  |
| C  | -5.10560000 | -3.04338200 | -0.29228400 |
| C  | -5.75047100 | -3.53761800 | 2.38656900  |
| C  | -6.24274600 | -3.78207500 | 0.04973900  |
| C  | -6.58074500 | -4.04291000 | 1.38148200  |
| H  | -6.00270200 | -3.72251800 | 3.42898700  |
| H  | -6.88216800 | -4.16027800 | -0.74546500 |
| C  | 2.17843100  | -3.94589100 | -1.56068800 |
| C  | 1.96696300  | -4.20189000 | -2.93274300 |
| C  | 3.01042500  | -4.78609600 | -0.79612800 |
| C  | 2.61800400  | -5.29189500 | -3.51862400 |
| C  | 3.63863000  | -5.86643400 | -1.42500800 |
| C  | 3.46182200  | -6.13179500 | -2.78583500 |
| H  | 2.45940100  | -5.48943300 | -4.57700800 |
| H  | 4.27929300  | -6.51806200 | -0.83406900 |
| C  | 3.81885900  | 2.75241900  | -0.19038400 |
| C  | 4.56078900  | 3.12496600  | -1.32911900 |
| C  | 4.23112900  | 3.14434100  | 1.09860700  |
| C  | 5.73805500  | 3.85838400  | -1.15106700 |
| C  | 5.41791900  | 3.87276200  | 1.22859800  |
| C  | 6.18970000  | 4.23098000  | 0.11932600  |
| H  | 6.31299300  | 4.15074400  | -2.02762600 |
| H  | 5.74308600  | 4.17180000  | 2.22323300  |



|   |             |             |             |
|---|-------------|-------------|-------------|
| C | -3.01688300 | 4.15705500  | -0.79207700 |
| C | -3.41265200 | 4.45902700  | -2.10938800 |
| C | -3.39185300 | 4.98581100  | 0.28244300  |
| C | -4.18726000 | 5.60247900  | -2.32933400 |
| C | -4.16713100 | 6.11870100  | 0.01668300  |
| C | -4.57657400 | 6.44230900  | -1.28112300 |
| H | -4.49284600 | 5.84235300  | -3.34587800 |
| H | -4.45731100 | 6.76424000  | 0.84349800  |
| C | -4.76929200 | -2.77016500 | -1.74049200 |
| H | -4.73048100 | -1.69350600 | -1.94344800 |
| H | -3.78343700 | -3.17120300 | -2.00342800 |
| H | -5.51031900 | -3.21789200 | -2.40950000 |
| C | -3.72301300 | -2.26143800 | 3.19548600  |
| H | -2.72559700 | -2.71571400 | 3.16148200  |
| H | -3.57828100 | -1.17876100 | 3.10242400  |
| H | -4.15293100 | -2.46649300 | 4.18063500  |
| C | -7.79715500 | -4.87106300 | 1.72516500  |
| H | -8.22602900 | -4.57363500 | 2.68833100  |
| H | -8.57687700 | -4.77561600 | 0.96176800  |
| H | -7.54131100 | -5.93667700 | 1.79802900  |
| C | -3.00484200 | 3.56212800  | -3.25576700 |
| H | -1.91504800 | 3.46546000  | -3.32341000 |
| H | -3.38890000 | 2.54396500  | -3.12240000 |
| H | -3.37619600 | 3.94677800  | -4.21052200 |
| C | -2.96012000 | 4.65514100  | 1.69283200  |
| H | -3.31684100 | 3.66293100  | 1.99420300  |
| H | -1.86704600 | 4.63417200  | 1.77915500  |
| H | -3.34519300 | 5.38873000  | 2.40767400  |
| C | -5.44336800 | 7.65313700  | -1.53891400 |
| H | -5.29103700 | 8.04838600  | -2.54904400 |
| H | -6.50872000 | 7.40335200  | -1.44398100 |
| H | -5.23393600 | 8.45674700  | -0.82428500 |
| C | 4.08176400  | 2.76335900  | -2.71709700 |
| H | 4.07412800  | 1.67856900  | -2.87358400 |
| H | 3.05435600  | 3.10821100  | -2.88259100 |
| H | 4.72069200  | 3.21205200  | -3.48374900 |
| C | 7.48774000  | 4.98597300  | 0.28830200  |
| H | 8.33636300  | 4.29541600  | 0.38565200  |
| H | 7.69228300  | 5.63135000  | -0.57305800 |
| H | 7.47419600  | 5.61262000  | 1.18671700  |
| C | 3.38874800  | 2.82156100  | 2.31068400  |
| H | 2.47061500  | 3.42307900  | 2.31532800  |
| H | 3.07806300  | 1.77373100  | 2.32629700  |
| H | 3.93339300  | 3.02405600  | 3.23679100  |

|   |             |             |             |
|---|-------------|-------------|-------------|
| C | 3.20360000  | -4.55644100 | 0.68495300  |
| H | 3.58277300  | -3.55136100 | 0.89797300  |
| H | 2.25580500  | -4.66003000 | 1.22596200  |
| H | 3.90982400  | -5.27735700 | 1.10783300  |
| C | 1.03590500  | -3.33590000 | -3.75052300 |
| H | -0.00789900 | -3.49093500 | -3.45053700 |
| H | 1.22593900  | -2.26677900 | -3.61034100 |
| H | 1.11942300  | -3.56875800 | -4.81652300 |
| C | 4.18124900  | -7.28047100 | -3.45388700 |
| H | 3.58705500  | -7.70454600 | -4.27074500 |
| H | 5.13620500  | -6.95049800 | -3.88455500 |
| H | 4.40449700  | -8.08342500 | -2.74305100 |
| C | 0.60620800  | -2.57431100 | 2.84060900  |
| H | -0.43042800 | -2.76139600 | 2.54766200  |
| H | 1.24202000  | -2.85906300 | 2.00148300  |
| H | 0.85300300  | -3.23112500 | 3.68759800  |
| C | -0.22734200 | -0.64295100 | 4.25618100  |
| H | -0.10139100 | -1.16047700 | 5.21848600  |
| H | -0.15618100 | 0.43518800  | 4.42826100  |
| H | -1.23473200 | -0.85280000 | 3.88765800  |
| H | 1.90038100  | 0.19258500  | 5.42334000  |
| H | 5.96791400  | 0.27362700  | 4.05198300  |

**cat2/a4**

|   |             |             |             |
|---|-------------|-------------|-------------|
| C | -2.30292100 | -1.33049100 | -0.97981400 |
| C | -3.70520400 | -1.06316200 | -1.19099200 |
| C | -3.89670300 | 0.25782200  | -0.91515000 |
| C | -2.59926800 | 0.80926700  | -0.59682500 |
| N | -1.65016900 | -0.17402500 | -0.62728800 |
| H | -4.43552300 | -1.80561300 | -1.48028300 |
| H | -4.81658200 | 0.82420300  | -0.93703600 |
| C | 1.09139400  | 3.00260700  | -0.51792400 |
| C | 0.51847900  | 4.33112200  | -0.54064900 |
| C | -0.82880900 | 4.17549800  | -0.42780100 |
| C | -1.07894800 | 2.75064800  | -0.38799100 |
| N | 0.10402000  | 2.06460000  | -0.44102800 |
| H | 1.08978600  | 5.24571600  | -0.61288100 |
| H | -1.59725400 | 4.93507700  | -0.40177300 |
| C | 1.66052100  | -2.60076400 | 0.04182500  |
| C | 1.44129100  | -4.02309200 | -0.08868000 |
| C | 0.17071900  | -4.18300400 | -0.55283700 |
| C | -0.40035200 | -2.86172900 | -0.65963000 |
| N | 0.51701500  | -1.91674200 | -0.28564900 |
| H | 2.18461100  | -4.78054200 | 0.11507500  |

|    |             |             |             |
|----|-------------|-------------|-------------|
| H  | -0.34865100 | -5.09867700 | -0.79748200 |
| C  | 3.19175400  | -0.66208500 | 0.21623100  |
| C  | 4.52183600  | -0.09908300 | 0.31830200  |
| C  | 4.41013200  | 1.22216800  | 0.01273600  |
| C  | 3.00666700  | 1.47326900  | -0.23052300 |
| N  | 2.29147700  | 0.31349200  | -0.10416400 |
| H  | 5.41100100  | -0.66094500 | 0.56664700  |
| H  | 5.18520700  | 1.97419700  | -0.02984300 |
| C  | -1.72270400 | -2.60016600 | -1.04777200 |
| C  | 2.46856100  | 2.73947500  | -0.48397600 |
| C  | -2.35567300 | 2.17989900  | -0.39529600 |
| C  | 2.90762300  | -2.03140400 | 0.33009900  |
| Fe | 0.30628700  | 0.07110300  | -0.31840300 |
| Cl | 0.65174400  | 0.02867800  | -2.66159800 |
| O  | 0.14800100  | 0.23492300  | 1.39646200  |
| H  | -0.66667900 | -0.57278300 | 1.88297100  |
| C  | -0.39328300 | -1.64342300 | 3.78707100  |
| C  | -0.85925000 | -0.52958100 | 4.76080000  |
| C  | -1.29557600 | -1.46294400 | 2.56595100  |
| C  | -2.52485300 | -0.83411400 | 3.06540300  |
| C  | -3.78089700 | -0.70856900 | 2.45886200  |
| C  | -4.80323800 | -0.05251400 | 3.14640700  |
| C  | -4.57383000 | 0.48446100  | 4.41947900  |
| C  | -3.31367800 | 0.37344500  | 5.02318400  |
| C  | -2.29351700 | -0.28417500 | 4.34559400  |
| H  | -3.95477200 | -1.10504700 | 1.46487700  |
| H  | -3.14120200 | 0.79209000  | 6.01196900  |
| H  | -5.78280600 | 0.04813100  | 2.68669000  |
| H  | -0.26453900 | 0.38018400  | 4.59850200  |
| H  | 0.66695300  | -1.57140200 | 3.53246500  |
| H  | -1.37363100 | -2.28137500 | 1.85093000  |
| C  | -3.53038600 | 3.09123800  | -0.23143900 |
| C  | -4.23025400 | 3.57036400  | -1.35589600 |
| C  | -3.91561900 | 3.46473100  | 1.07225200  |
| C  | -5.33859000 | 4.39897200  | -1.15197800 |
| C  | -5.03373900 | 4.28984500  | 1.22750400  |
| C  | -5.75918500 | 4.76498700  | 0.13044300  |
| H  | -5.88393900 | 4.77025800  | -2.01749300 |
| H  | -5.34242700 | 4.57101400  | 2.23258900  |
| C  | 3.41117600  | 3.88270600  | -0.68475500 |
| C  | 3.85279500  | 4.17253300  | -1.99048600 |
| C  | 3.84766500  | 4.64890700  | 0.41221500  |
| C  | 4.73511100  | 5.24156200  | -2.17530800 |
| C  | 4.73058900  | 5.70855400  | 0.18110900  |

|   |             |             |             |
|---|-------------|-------------|-------------|
| C | 5.18245100  | 6.02249000  | -1.10475900 |
| H | 5.08210100  | 5.46839400  | -3.18152300 |
| H | 5.07397200  | 6.30187400  | 1.02641200  |
| C | 4.03524200  | -2.95533900 | 0.67252500  |
| C | 4.88807000  | -3.42503400 | -0.34652300 |
| C | 4.23191300  | -3.34651000 | 2.00978300  |
| C | 5.93693200  | -4.28230000 | -0.00026700 |
| C | 5.29555800  | -4.20293600 | 2.31207000  |
| C | 6.15748600  | -4.68302400 | 1.32170700  |
| H | 6.59900400  | -4.64551600 | -0.78391500 |
| H | 5.45359700  | -4.50165500 | 3.34653200  |
| C | -2.55008100 | -3.73105100 | -1.57222000 |
| C | -2.61390300 | -3.91624900 | -2.96914600 |
| C | -3.24220000 | -4.59210300 | -0.70022500 |
| C | -3.37617800 | -4.97596600 | -3.46901800 |
| C | -3.99571600 | -5.63723800 | -1.24581100 |
| C | -4.07662500 | -5.84474900 | -2.62564000 |
| H | -3.42253400 | -5.12696700 | -4.54581700 |
| H | -4.53191100 | -6.30509000 | -0.57447800 |
| C | 3.37196500  | 4.32711600  | 1.81049700  |
| H | 2.27997100  | 4.39724200  | 1.88397500  |
| H | 3.63984600  | 3.30267200  | 2.09583900  |
| H | 3.80804800  | 5.01120100  | 2.54486000  |
| C | 3.38437600  | 3.33750600  | -3.16023000 |
| H | 3.67798700  | 2.28744300  | -3.04596500 |
| H | 2.29121700  | 3.33531900  | -3.24103400 |
| H | 3.79863700  | 3.70913800  | -4.10238600 |
| C | 6.10895400  | 7.19396500  | -1.33550800 |
| H | 6.75910100  | 7.02679600  | -2.20115200 |
| H | 5.54119800  | 8.11427800  | -1.52796900 |
| H | 6.74519400  | 7.38119100  | -0.46357800 |
| C | 3.30275600  | -2.85575300 | 3.09596000  |
| H | 3.22641300  | -1.76200500 | 3.09465100  |
| H | 2.28688600  | -3.24088900 | 2.94629200  |
| H | 3.64358400  | -3.17509200 | 4.08556600  |
| C | 4.67401100  | -3.00807600 | -1.78366200 |
| H | 3.65238400  | -3.22685600 | -2.11529600 |
| H | 4.81642900  | -1.92831600 | -1.90998600 |
| H | 5.36979100  | -3.52378800 | -2.45230600 |
| C | 7.28053400  | -5.63485700 | 1.66300000  |
| H | 7.60298000  | -5.51991200 | 2.70340900  |
| H | 6.96649300  | -6.67906200 | 1.53150300  |
| H | 8.15152800  | -5.47532400 | 1.01777000  |
| C | -3.17390000 | -4.40133700 | 0.79787700  |

|   |             |             |             |
|---|-------------|-------------|-------------|
| H | -2.14913100 | -4.52269300 | 1.16887600  |
| H | -3.49966900 | -3.39717600 | 1.09134100  |
| H | -3.80801900 | -5.12558000 | 1.31808300  |
| C | -1.87998300 | -2.98219500 | -3.90426400 |
| H | -2.31089700 | -1.97425700 | -3.87549400 |
| H | -0.82769300 | -2.86273600 | -3.62391300 |
| H | -1.92641300 | -3.34240000 | -4.93650300 |
| C | -4.92048600 | -6.96055600 | -3.19686200 |
| H | -5.90520600 | -6.58931300 | -3.51095800 |
| H | -4.44847900 | -7.40884600 | -4.07837600 |
| H | -5.08971900 | -7.75450800 | -2.46170200 |
| C | -3.11974500 | 3.01164300  | 2.27475800  |
| H | -2.92067800 | 1.93658500  | 2.25462500  |
| H | -2.14396300 | 3.51306400  | 2.30378300  |
| H | -3.64692300 | 3.23672300  | 3.20577500  |
| C | -3.78561400 | 3.20920400  | -2.75542500 |
| H | -2.72345800 | 3.43597700  | -2.90397200 |
| H | -3.90513400 | 2.13766800  | -2.95371500 |
| H | -4.36144400 | 3.75890600  | -3.50615500 |
| C | -6.94267200 | 5.68424800  | 0.32555400  |
| H | -7.65466300 | 5.60526700  | -0.50314000 |
| H | -7.47701400 | 5.45901800  | 1.25516700  |
| H | -6.62254600 | 6.73342400  | 0.38138800  |
| H | -0.75475400 | -0.80319200 | 5.81677000  |
| H | -0.56761500 | -2.63295900 | 4.23495700  |
| H | -5.37942900 | 0.99254000  | 4.94318800  |

**cat2/a5**

|   |             |             |             |
|---|-------------|-------------|-------------|
| C | -2.40216100 | -1.10545400 | -1.01524200 |
| C | -3.77437900 | -0.72044400 | -1.24194000 |
| C | -3.85825300 | 0.61008000  | -0.95835400 |
| C | -2.52418900 | 1.04673800  | -0.61671300 |
| N | -1.65943200 | -0.00900800 | -0.65071600 |
| H | -4.56136300 | -1.39740600 | -1.54246900 |
| H | -4.72728000 | 1.25137000  | -0.98665800 |
| C | 1.32599400  | 2.93237500  | -0.47219900 |
| C | 0.86371700  | 4.30334600  | -0.46163400 |
| C | -0.49186700 | 4.25496300  | -0.35350300 |
| C | -0.85591300 | 2.85460500  | -0.34998700 |
| N | 0.26703100  | 2.07551700  | -0.41821100 |
| H | 1.50823200  | 5.16933200  | -0.51123100 |
| H | -1.19670800 | 5.07304200  | -0.30895000 |
| C | 1.44701300  | -2.71071900 | -0.00801700 |
| C | 1.10980500  | -4.10860800 | -0.14294500 |

|    |             |             |             |
|----|-------------|-------------|-------------|
| C  | -0.17590000 | -4.15908300 | -0.59009700 |
| C  | -0.63620000 | -2.79444500 | -0.68268300 |
| N  | 0.36146000  | -1.93145400 | -0.31691800 |
| H  | 1.79067900  | -4.92619200 | 0.04588700  |
| H  | -0.77159800 | -5.02674300 | -0.83487900 |
| C  | 3.13419500  | -0.90543800 | 0.16184500  |
| C  | 4.50531800  | -0.45343200 | 0.25837700  |
| C  | 4.49652600  | 0.87853900  | -0.01991000 |
| C  | 3.11558800  | 1.24558800  | -0.24031400 |
| N  | 2.31122700  | 0.14396000  | -0.13149900 |
| H  | 5.34804500  | -1.08975200 | 0.48766700  |
| H  | 5.32888400  | 1.56676200  | -0.05630800 |
| C  | -1.93366000 | -2.42143100 | -1.06813400 |
| C  | 2.67832600  | 2.55790300  | -0.45262500 |
| C  | -2.17361500 | 2.38932800  | -0.37842200 |
| C  | 2.74057000  | -2.24816600 | 0.26845500  |
| Fe | 0.30977900  | 0.06808200  | -0.31724800 |
| Cl | 0.63588600  | 0.02536600  | -2.66906400 |
| O  | 0.15654400  | 0.21588100  | 1.38333400  |
| H  | -0.56017500 | -0.60432000 | 1.98207800  |
| C  | -0.42547400 | -1.52278500 | 3.94234800  |
| C  | -1.06291400 | -0.84794700 | 4.93838900  |
| C  | -1.22262600 | -1.47059700 | 2.70667400  |
| C  | -2.48493600 | -0.80114500 | 3.09575400  |
| C  | -3.64545100 | -0.52538100 | 2.38162100  |
| C  | -4.68755400 | 0.16795500  | 3.01504800  |
| C  | -4.55821600 | 0.59141000  | 4.34118300  |
| C  | -3.39039700 | 0.31987900  | 5.06846300  |
| C  | -2.35855600 | -0.38371900 | 4.44871400  |
| H  | -3.74502600 | -0.82420800 | 1.34524800  |
| H  | -3.29886000 | 0.64339200  | 6.10261300  |
| H  | -5.59594700 | 0.39031000  | 2.46149500  |
| H  | -0.68621700 | -0.67568700 | 5.94110400  |
| H  | 0.55799000  | -1.97174300 | 4.00476000  |
| H  | -1.23692100 | -2.31749400 | 2.02033100  |
| C  | -3.27537400 | 3.38188100  | -0.18941300 |
| C  | -3.92297900 | 3.95592500  | -1.30031100 |
| C  | -3.64277100 | 3.73251400  | 1.12567800  |
| C  | -4.96659100 | 4.85880800  | -1.07278100 |
| C  | -4.69526800 | 4.63575900  | 1.30351800  |
| C  | -5.37445400 | 5.20237400  | 0.22011900  |
| H  | -5.46949100 | 5.30736500  | -1.92722800 |
| H  | -4.98820800 | 4.90587500  | 2.31623600  |
| C  | 3.70771100  | 3.62902500  | -0.62114400 |

|   |             |             |             |
|---|-------------|-------------|-------------|
| C | 4.16374900  | 3.93095100  | -1.91906200 |
| C | 4.20793800  | 4.31727000  | 0.50004200  |
| C | 5.12597200  | 4.93384500  | -2.07165100 |
| C | 5.16972800  | 5.31270600  | 0.30021500  |
| C | 5.63830000  | 5.63764700  | -0.97681900 |
| H | 5.48482500  | 5.16962000  | -3.07162100 |
| H | 5.56228300  | 5.84601300  | 1.16379300  |
| C | 3.78872900  | -3.26177900 | 0.60712200  |
| C | 4.61572700  | -3.78472900 | -0.40725000 |
| C | 3.93469700  | -3.68227900 | 1.94201600  |
| C | 5.59173800  | -4.72238900 | -0.05706200 |
| C | 4.92665900  | -4.61927400 | 2.24807500  |
| C | 5.76411300  | -5.15152200 | 1.26339800  |
| H | 6.23436300  | -5.12744000 | -0.83634500 |
| H | 5.04683400  | -4.94036200 | 3.28083500  |
| C | -2.85979500 | -3.48363300 | -1.56875600 |
| C | -3.00074700 | -3.64386600 | -2.96316100 |
| C | -3.56497800 | -4.31037800 | -0.67299600 |
| C | -3.85114800 | -4.64642800 | -3.43797400 |
| C | -4.40914900 | -5.29643600 | -1.19531800 |
| C | -4.56619000 | -5.48022500 | -2.57198700 |
| H | -3.95553200 | -4.78036700 | -4.51296500 |
| H | -4.95705500 | -5.93672200 | -0.50693700 |
| C | 3.71494600  | 3.98311700  | 1.88946200  |
| H | 2.63389400  | 4.14557400  | 1.97768600  |
| H | 3.89372400  | 2.92895000  | 2.13270100  |
| H | 4.21402100  | 4.59706700  | 2.64522100  |
| C | 3.62604400  | 3.17805200  | -3.11449900 |
| H | 3.83619900  | 2.10458500  | -3.03974400 |
| H | 2.53592200  | 3.26626200  | -3.18875600 |
| H | 4.06511100  | 3.54906700  | -4.04552300 |
| C | 6.65256800  | 6.74071100  | -1.17266700 |
| H | 7.29878600  | 6.54287300  | -2.03480800 |
| H | 6.15746600  | 7.70455900  | -1.35195300 |
| H | 7.29020400  | 6.86166600  | -0.29027500 |
| C | 3.02330300  | -3.14096800 | 3.01942800  |
| H | 2.99538900  | -2.04510200 | 3.01216100  |
| H | 1.99257700  | -3.48263300 | 2.86259200  |
| H | 3.34142800  | -3.47107800 | 4.01298900  |
| C | 4.44890400  | -3.34154500 | -1.84285800 |
| H | 3.41468800  | -3.47096200 | -2.18234300 |
| H | 4.68403300  | -2.27726900 | -1.96205700 |
| H | 5.10273700  | -3.91087100 | -2.51023600 |
| C | 6.80933700  | -6.18698000 | 1.60805100  |

|   |             |             |             |
|---|-------------|-------------|-------------|
| H | 7.11043900  | -6.12003400 | 2.65890000  |
| H | 6.42808400  | -7.20325900 | 1.44083700  |
| H | 7.70646000  | -6.07224400 | 0.98960600  |
| C | -3.41619700 | -4.15018100 | 0.82322400  |
| H | -2.39668400 | -4.38552600 | 1.15155000  |
| H | -3.62158600 | -3.12414000 | 1.14621600  |
| H | -4.10124800 | -4.81305000 | 1.36013300  |
| C | -2.25427200 | -2.74625200 | -3.92414300 |
| H | -2.65182500 | -1.72435800 | -3.89925400 |
| H | -1.19243500 | -2.66051800 | -3.66890500 |
| H | -2.33629400 | -3.11593200 | -4.95078000 |
| C | -5.50349900 | -6.53374600 | -3.11498000 |
| H | -6.47505400 | -6.09733600 | -3.38275800 |
| H | -5.09921200 | -7.00113100 | -4.01990800 |
| H | -5.69109700 | -7.32330300 | -2.37964300 |
| C | -2.89082600 | 3.17788200  | 2.31402100  |
| H | -2.74717900 | 2.09612500  | 2.24368500  |
| H | -1.89118300 | 3.62605600  | 2.38119600  |
| H | -3.42001900 | 3.38277200  | 3.24855000  |
| C | -3.48440600 | 3.62110500  | -2.70827700 |
| H | -2.41526600 | 3.82072300  | -2.84776300 |
| H | -3.63456000 | 2.55959000  | -2.93696800 |
| H | -4.04026800 | 4.20877300  | -3.44504900 |
| C | -6.53257900 | 6.14723700  | 0.44286000  |
| H | -6.66381300 | 6.82961900  | -0.40381600 |
| H | -7.47390800 | 5.59494000  | 0.56612400  |
| H | -6.39042100 | 6.75000100  | 1.34662400  |
| H | -5.37191500 | 1.13468800  | 4.81493700  |

**cat2/a6**

|   |             |             |             |
|---|-------------|-------------|-------------|
| C | -1.15443700 | 2.74709100  | -0.47356200 |
| C | -0.93625000 | 4.17696400  | -0.51907300 |
| C | 0.40711300  | 4.36208400  | -0.63740300 |
| C | 1.00934900  | 3.04675100  | -0.61006900 |
| N | 0.04225500  | 2.08787600  | -0.52818100 |
| H | -1.72158700 | 4.91913000  | -0.49313400 |
| H | 0.95772600  | 5.28889500  | -0.71470000 |
| C | 3.17629400  | -0.56711900 | 0.17241400  |
| C | 4.49694200  | 0.01953800  | 0.25970900  |
| C | 4.36085300  | 1.33509000  | -0.06163400 |
| C | 2.95297100  | 1.55864000  | -0.30332600 |
| N | 2.25862000  | 0.38809800  | -0.15879900 |
| H | 5.39708300  | -0.52366000 | 0.50943800  |
| H | 5.12293100  | 2.09939600  | -0.11821900 |



|    |             |             |             |
|----|-------------|-------------|-------------|
| C  | -2.28269900 | -1.35416600 | -1.09593500 |
| C  | -3.69472000 | -1.12292700 | -1.28593800 |
| C  | -3.91901900 | 0.18835500  | -0.98780000 |
| C  | -2.63220200 | 0.77348700  | -0.68450700 |
| N  | -1.65862900 | -0.18478400 | -0.73844200 |
| H  | -4.40826300 | -1.88170700 | -1.57466100 |
| H  | -4.85562800 | 0.72701700  | -0.98578500 |
| C  | -0.35250600 | -2.84371100 | -0.74418300 |
| C  | 0.23578700  | -4.15404700 | -0.59937100 |
| C  | 1.48994400  | -3.96676700 | -0.10139400 |
| C  | 1.68648500  | -2.53890900 | 0.00684100  |
| N  | 0.53920500  | -1.87928800 | -0.35912900 |
| H  | -0.26416900 | -5.08176600 | -0.83913400 |
| H  | 2.23673500  | -4.70976000 | 0.13989600  |
| C  | -2.41867000 | 2.14708600  | -0.47008500 |
| C  | 2.91807500  | -1.94101400 | 0.30491900  |
| C  | 2.39106900  | 2.81170000  | -0.57241100 |
| C  | -1.67169100 | -2.61034100 | -1.16238400 |
| Fe | 0.28555900  | 0.10147500  | -0.40111800 |
| Cl | 0.67299000  | 0.06673600  | -2.73913500 |
| O  | 0.07818800  | 0.26126200  | 1.30886100  |
| H  | -1.18409000 | -1.55897600 | 5.89738300  |
| C  | 4.07341000  | -2.83009600 | 0.65078200  |
| C  | 4.39750800  | -3.07944400 | 1.99734100  |
| C  | 4.84811500  | -3.38642800 | -0.38866600 |
| C  | 5.49702200  | -3.89593700 | 2.28492200  |
| C  | 5.93596000  | -4.19808500 | -0.05495500 |
| C  | 6.27470500  | -4.46860700 | 1.27515000  |
| H  | 5.75256600  | -4.08543500 | 3.32575300  |
| H  | 6.53862800  | -4.62386900 | -0.85481900 |
| C  | -2.46219500 | -3.75935400 | -1.70471400 |
| C  | -3.20145000 | -4.60342200 | -0.85521300 |
| C  | -2.44908900 | -3.97288900 | -3.09897900 |
| C  | -3.91919500 | -5.66371800 | -1.41976900 |
| C  | -3.17967500 | -5.04535800 | -3.61834700 |
| C  | -3.91748500 | -5.90385000 | -2.79661400 |
| H  | -4.49434700 | -6.31632300 | -0.76590300 |
| H  | -3.17278000 | -5.21332000 | -4.69358300 |
| C  | -3.60969200 | 3.02641700  | -0.26101600 |
| C  | -3.93665200 | 3.40860500  | 1.05639900  |
| C  | -4.37777600 | 3.47513900  | -1.35394300 |
| C  | -5.07472700 | 4.19598700  | 1.25968800  |
| C  | -5.50127900 | 4.26869200  | -1.10219300 |
| C  | -5.87504200 | 4.62657600  | 0.19742600  |

|   |             |             |             |
|---|-------------|-------------|-------------|
| H | -5.33666800 | 4.48562600  | 2.27554300  |
| H | -6.09524600 | 4.62151400  | -1.94309700 |
| C | 3.31117800  | 3.97094000  | -0.78446200 |
| C | 3.73820000  | 4.75192500  | 0.30584500  |
| C | 3.74160300  | 4.26044300  | -2.09399600 |
| C | 4.60049900  | 5.82603500  | 0.06416400  |
| C | 4.60369800  | 5.34407600  | -2.28926400 |
| C | 5.04121100  | 6.13981500  | -1.22564900 |
| H | 4.93644000  | 6.43106700  | 0.90414400  |
| H | 4.94237000  | 5.57061200  | -3.29835900 |
| C | -3.23081900 | -4.37119900 | 0.63798100  |
| H | -2.22517900 | -4.42653700 | 1.07111200  |
| H | -3.62643000 | -3.37814400 | 0.88145100  |
| H | -3.85634600 | -5.11417800 | 1.14187000  |
| C | -1.67181600 | -3.05110600 | -4.01058600 |
| H | -2.07252000 | -2.03106200 | -3.98091500 |
| H | -0.62257200 | -2.96556900 | -3.70686600 |
| H | -1.70542200 | -3.40154400 | -5.04664100 |
| C | -4.67103600 | -7.07458800 | -3.38387900 |
| H | -5.11038900 | -6.82137400 | -4.35526700 |
| H | -4.00439000 | -7.93250000 | -3.54422500 |
| H | -5.47821300 | -7.40694900 | -2.72241700 |
| C | -3.97988700 | 3.13429700  | -2.77295700 |
| H | -2.92750800 | 3.37918900  | -2.95757200 |
| H | -4.09069400 | 2.06384000  | -2.98093900 |
| H | -4.59115100 | 3.68371000  | -3.49538800 |
| C | -3.05332200 | 3.02545300  | 2.22238400  |
| H | -2.72068700 | 1.98569900  | 2.16826100  |
| H | -2.14828200 | 3.64665500  | 2.23693700  |
| H | -3.57451700 | 3.16047900  | 3.17391200  |
| C | -7.12019100 | 5.44557000  | 0.44693900  |
| H | -7.99899600 | 4.79886700  | 0.57333500  |
| H | -7.02838000 | 6.04980100  | 1.35606000  |
| H | -7.33190100 | 6.12039800  | -0.38972200 |
| C | 3.28263900  | 3.41033300  | -3.25656700 |
| H | 3.58468800  | 2.36386000  | -3.13246400 |
| H | 2.18964600  | 3.39786300  | -3.33881900 |
| H | 3.69477000  | 3.77720400  | -4.20151900 |
| C | 3.27464000  | 4.43036100  | 1.70824500  |
| H | 2.18149200  | 4.47431400  | 1.78472800  |
| H | 3.56863200  | 3.41524500  | 2.00116600  |
| H | 3.69609700  | 5.13095900  | 2.43553200  |
| C | 5.94511300  | 7.32659500  | -1.46747900 |
| H | 6.58792600  | 7.17010000  | -2.34053300 |

|   |             |             |             |
|---|-------------|-------------|-------------|
| H | 5.35967800  | 8.23713300  | -1.65336300 |
| H | 6.58817700  | 7.52493000  | -0.60300500 |
| C | 4.51558600  | -3.10190600 | -1.83579700 |
| H | 3.52481200  | -3.48909800 | -2.10111100 |
| H | 4.49091300  | -2.02439400 | -2.03559800 |
| H | 5.25024200  | -3.55801200 | -2.50613900 |
| C | 3.56801300  | -2.49912400 | 3.12023000  |
| H | 3.30057200  | -1.45360800 | 2.93537800  |
| H | 2.62666600  | -3.04965500 | 3.23596700  |
| H | 4.10252200  | -2.55353800 | 4.07385800  |
| C | 7.43776800  | -5.37397600 | 1.60842500  |
| H | 7.12252100  | -6.42561300 | 1.63990200  |
| H | 8.23381400  | -5.29661600 | 0.85975000  |
| H | 7.86685400  | -5.13345500 | 2.58710600  |
| C | -4.50893000 | 0.50998100  | 4.42953500  |
| C | -3.29784100 | 0.26883800  | 5.08107500  |
| C | -3.65835900 | -0.60379100 | 2.46941400  |
| C | -4.69104000 | 0.06503500  | 3.11575800  |
| H | -5.62594800 | 0.25433700  | 2.59531100  |
| C | -2.43174800 | -0.85460000 | 3.11684400  |
| C | -2.25230500 | -0.41205800 | 4.44944500  |
| C | -0.23764000 | -2.12977200 | 3.24585300  |
| C | 0.20552600  | -1.11118400 | 4.30372900  |
| C | -0.97431200 | -0.72516900 | 5.20875200  |
| C | -1.33974400 | -1.52714700 | 2.39696700  |
| H | 0.59863400  | -2.41551700 | 2.60147200  |
| H | 1.02512400  | -1.51142200 | 4.91274800  |
| H | -0.71635200 | -0.59158700 | 1.77966700  |
| H | -1.66863900 | -2.14388600 | 1.56152200  |
| H | -0.70537300 | 0.12779400  | 5.84499900  |
| H | -0.60237300 | -3.04856200 | 3.73461100  |
| H | 0.58484300  | -0.22461400 | 3.78174900  |
| H | -3.16041100 | 0.61189900  | 6.10480900  |
| H | -3.78539800 | -0.93253600 | 1.44298200  |
| H | -5.30430200 | 1.04443100  | 4.94253300  |

**cat2/a7**

|   |             |             |             |
|---|-------------|-------------|-------------|
| C | -0.30462200 | -2.68020200 | -0.95526000 |
| C | -1.24272200 | -3.77763000 | -0.93763700 |
| C | -2.44037200 | -3.26119200 | -0.54747900 |
| C | -2.24334400 | -1.84024300 | -0.37400500 |
| N | -0.92577300 | -1.51731900 | -0.58576500 |
| H | -0.99911700 | -4.79912300 | -1.19273600 |
| H | -3.38501600 | -3.76998600 | -0.42018400 |

|    |             |             |             |
|----|-------------|-------------|-------------|
| C  | -2.28564800 | 2.46782700  | -0.42289100 |
| C  | -3.71908000 | 2.63692000  | -0.33891300 |
| C  | -4.24951800 | 1.39315200  | -0.19093600 |
| C  | -3.13974500 | 0.46426900  | -0.21447500 |
| N  | -1.96149400 | 1.13820000  | -0.34912800 |
| H  | -4.22871300 | 3.58912900  | -0.37793300 |
| H  | -5.28721400 | 1.10897900  | -0.09128300 |
| C  | 2.87749200  | 0.16688500  | -0.66289700 |
| C  | 3.96137900  | -0.72374100 | -1.00943200 |
| C  | 3.39470500  | -1.90990500 | -1.36979900 |
| C  | 1.97156300  | -1.76110100 | -1.18238200 |
| N  | 1.68163600  | -0.48410600 | -0.76556300 |
| H  | 5.00804100  | -0.45687800 | -0.98891200 |
| H  | 3.87991300  | -2.81861500 | -1.69679300 |
| C  | 2.00210600  | 2.45549700  | -0.31349900 |
| C  | 2.19186100  | 3.88712600  | -0.22254000 |
| C  | 0.95903400  | 4.45069500  | -0.34087000 |
| C  | 0.01643000  | 3.35958700  | -0.45969700 |
| N  | 0.67073800  | 2.16439400  | -0.45167200 |
| H  | 3.15018600  | 4.37432600  | -0.11182000 |
| H  | 0.69025000  | 5.49743400  | -0.33647300 |
| C  | 1.04875200  | -2.80338300 | -1.30586900 |
| C  | -1.37661900 | 3.52558500  | -0.50915200 |
| C  | -3.29074600 | -0.93145500 | -0.18326600 |
| C  | 3.04789000  | 1.53048000  | -0.35352100 |
| Fe | -0.12857700 | 0.31771400  | -0.47754300 |
| Cl | -0.34721100 | 0.50844800  | -2.83263800 |
| O  | 0.00111000  | 0.33604000  | 1.24693100  |
| H  | 0.37750600  | -0.72245700 | 1.76496000  |
| C  | 3.49431100  | -0.89331900 | 4.82441900  |
| C  | 4.61688100  | -1.09537200 | 4.01699400  |
| C  | 4.44084200  | -1.52704000 | 2.69933000  |
| C  | 3.16010000  | -1.75249600 | 2.20462700  |
| C  | 2.01594700  | -1.55834000 | 3.00422400  |
| C  | 2.21099100  | -1.11910700 | 4.32784300  |
| H  | 3.61765800  | -0.56199900 | 5.85245900  |
| H  | 5.29949300  | -1.67990500 | 2.05095100  |
| H  | 3.03616900  | -2.07560100 | 1.17889000  |
| H  | 1.35541500  | -0.97612800 | 4.97854700  |
| C  | 0.67979900  | -1.81261500 | 2.40632200  |
| H  | 0.73747800  | -2.52452500 | 1.58152800  |
| C  | -0.49282300 | -2.05751900 | 3.29177500  |
| C  | -1.03468200 | -1.03156100 | 4.08635000  |
| C  | -1.07214000 | -3.33490000 | 3.36518900  |

|   |             |             |             |
|---|-------------|-------------|-------------|
| C | -2.07596900 | -1.29333900 | 4.97572700  |
| H | -0.63873200 | -0.02550500 | 3.98392500  |
| C | -2.11765200 | -3.59681000 | 4.25188600  |
| C | -2.61236600 | -2.58056600 | 5.07248400  |
| H | -2.47839800 | -0.48881200 | 5.58575800  |
| H | -2.54441600 | -4.59521700 | 4.30265400  |
| C | -4.68109400 | -1.47321000 | -0.05986700 |
| C | -5.41670500 | -1.77211900 | -1.22407100 |
| C | -5.24649700 | -1.65272400 | 1.21579400  |
| C | -6.71841100 | -2.26363300 | -1.08409500 |
| C | -6.55058600 | -2.14904300 | 1.30865900  |
| C | -7.30103300 | -2.46382700 | 0.17168800  |
| H | -7.29267200 | -2.49225800 | -1.97982300 |
| H | -6.99013200 | -2.28969100 | 2.29428000  |
| C | 1.52201200  | -4.10496600 | -1.87241500 |
| C | 1.86590300  | -5.18553500 | -1.03700800 |
| C | 1.60318900  | -4.22577100 | -3.27532100 |
| C | 2.28867600  | -6.38161400 | -1.62590500 |
| C | 2.02862500  | -5.44193500 | -3.81902700 |
| C | 2.37869900  | -6.52949600 | -3.01338600 |
| H | 2.55348900  | -7.21896300 | -0.98322600 |
| H | 2.08456500  | -5.54138500 | -4.90123600 |
| C | -1.91469900 | 4.91568100  | -0.62775700 |
| C | -2.08690500 | 5.47026600  | -1.91106600 |
| C | -2.24261600 | 5.65052200  | 0.52680900  |
| C | -2.59655700 | 6.76819300  | -2.01472100 |
| C | -2.74689300 | 6.94629100  | 0.37611600  |
| C | -2.92946700 | 7.52270700  | -0.88492700 |
| H | -2.73736700 | 7.19969000  | -3.00384600 |
| H | -3.00414900 | 7.51789900  | 1.26576000  |
| C | 4.43472700  | 2.02445000  | -0.09151700 |
| C | 4.84782900  | 2.18574600  | 1.24660100  |
| C | 5.30347900  | 2.32995100  | -1.15763800 |
| C | 6.15892200  | 2.60509400  | 1.49359500  |
| C | 6.60308200  | 2.75323300  | -0.86181200 |
| C | 7.05414100  | 2.88256400  | 0.45593000  |
| H | 6.48566600  | 2.72311600  | 2.52499800  |
| H | 7.27726300  | 2.99267500  | -1.68182000 |
| C | 3.88394800  | 1.96131000  | 2.38936400  |
| H | 3.15933900  | 2.78375300  | 2.44670400  |
| H | 3.30682300  | 1.04045800  | 2.26968000  |
| H | 4.41084300  | 1.90407600  | 3.34542400  |
| C | 4.83323600  | 2.23024400  | -2.59158000 |
| H | 4.60874100  | 1.19537400  | -2.87436600 |

|   |             |             |             |
|---|-------------|-------------|-------------|
| H | 3.90986100  | 2.80105800  | -2.74471500 |
| H | 5.59073100  | 2.61329600  | -3.28205500 |
| C | 8.47732500  | 3.29602600  | 0.75072800  |
| H | 9.13296700  | 2.41894100  | 0.83643400  |
| H | 8.88511200  | 3.92981800  | -0.04426000 |
| H | 8.54812100  | 3.84713600  | 1.69489000  |
| C | -2.05473600 | 5.04637900  | 1.89976700  |
| H | -2.67254700 | 4.14922100  | 2.02675700  |
| H | -1.01488800 | 4.73594700  | 2.05801900  |
| H | -2.32217600 | 5.75860400  | 2.68626500  |
| C | -1.72479000 | 4.67484700  | -3.14439000 |
| H | -0.65297900 | 4.44414400  | -3.16733000 |
| H | -2.24174800 | 3.70878800  | -3.16939900 |
| H | -1.97532000 | 5.22432000  | -4.05685700 |
| C | -3.44619800 | 8.93597800  | -1.02431900 |
| H | -2.61834600 | 9.65617100  | -1.07236600 |
| H | -4.03580100 | 9.05887900  | -1.93946500 |
| H | -4.07557000 | 9.21981100  | -0.17392000 |
| C | -4.45568100 | -1.30509700 | 2.45271800  |
| H | -3.48887800 | -1.81696000 | 2.47002400  |
| H | -4.23947500 | -0.23053100 | 2.49670300  |
| H | -4.99562200 | -1.57989400 | 3.36297600  |
| C | -4.81466200 | -1.56019200 | -2.59446400 |
| H | -4.44542000 | -0.53532000 | -2.71637200 |
| H | -3.95427000 | -2.22003400 | -2.75741300 |
| H | -5.54809400 | -1.75682200 | -3.38228600 |
| C | -8.69672400 | -3.02981100 | 0.29621800  |
| H | -8.67531800 | -4.12708400 | 0.34045200  |
| H | -9.19302300 | -2.67762400 | 1.20709900  |
| H | -9.32075300 | -2.75174000 | -0.56016700 |
| C | 1.24515300  | -3.06352400 | -4.17394100 |
| H | 0.28122500  | -2.61667000 | -3.90731000 |
| H | 1.98155500  | -2.25546200 | -4.08778900 |
| H | 1.20572100  | -3.37551100 | -5.22206700 |
| C | 1.78093000  | -5.06930800 | 0.46813700  |
| H | 2.41447200  | -4.26075100 | 0.84955400  |
| H | 0.75753700  | -4.85087000 | 0.79508200  |
| H | 2.09722600  | -5.99742900 | 0.95363000  |
| C | 2.86813300  | -7.82199800 | -3.62429800 |
| H | 3.95963500  | -7.81229700 | -3.74623100 |
| H | 2.61952000  | -8.68353000 | -2.99497300 |
| H | 2.43211000  | -7.98789100 | -4.61539400 |
| H | 5.61465700  | -0.91636700 | 4.40841500  |
| H | -0.68241700 | -4.13106300 | 2.73558300  |

|                |             |             |             |
|----------------|-------------|-------------|-------------|
| H              | -3.42450500 | -2.78405400 | 5.76533600  |
| <b>cat2/a8</b> |             |             |             |
| C              | 2.75456500  | -0.89335500 | -0.58830200 |
| C              | 3.42996500  | -2.14789400 | -0.83308600 |
| C              | 2.47156000  | -3.04686200 | -1.19218100 |
| C              | 1.20816000  | -2.35443100 | -1.11899000 |
| N              | 1.40112400  | -1.05160700 | -0.73739700 |
| H              | 4.49743600  | -2.29672900 | -0.75770000 |
| H              | 2.58834000  | -4.08572700 | -1.46584600 |
| C              | -2.77400600 | -0.83395600 | -0.58888400 |
| C              | -3.47662600 | -2.07290600 | -0.83643700 |
| C              | -2.53770100 | -2.99244300 | -1.19487100 |
| C              | -1.25939200 | -2.32830400 | -1.11871300 |
| N              | -1.42428700 | -1.02181700 | -0.73596600 |
| H              | -4.54731900 | -2.19794600 | -0.76368500 |
| H              | -2.67705400 | -4.02795800 | -1.47051100 |
| C              | 1.26762500  | 3.13751000  | -0.36442000 |
| C              | 2.54814300  | 3.80285100  | -0.27938900 |
| C              | 3.49033500  | 2.82438700  | -0.21893100 |
| C              | 2.78301400  | 1.56386100  | -0.28920700 |
| N              | 1.43626600  | 1.78068300  | -0.37479900 |
| H              | 2.68370500  | 4.87475500  | -0.26305900 |
| H              | 4.56414200  | 2.92425800  | -0.15273000 |
| C              | -1.20104600 | 3.16441100  | -0.36414500 |
| C              | -2.46734100 | 3.85692800  | -0.28198700 |
| C              | -3.43007000 | 2.89877600  | -0.22032800 |
| C              | -2.74972300 | 1.62338900  | -0.28853200 |
| N              | -1.39850900 | 1.81151000  | -0.37280000 |
| H              | -2.58061000 | 4.93145000  | -0.26874600 |
| H              | -4.50155600 | 3.02162500  | -0.15545500 |
| C              | 3.42023600  | 0.31719500  | -0.33848700 |
| C              | -3.41344100 | 0.39076600  | -0.33920600 |
| C              | -0.03225400 | -2.96080900 | -1.35712400 |
| C              | 0.04054700  | 3.80995700  | -0.39186900 |
| Fe             | 0.00339600  | 0.36580300  | -0.48958500 |
| Cl             | 0.00460700  | 0.70405100  | -2.83775600 |
| O              | 0.00254900  | 0.25161100  | 1.22581000  |
| H              | -0.00677500 | -0.89707100 | 1.70524500  |
| C              | 2.99622900  | -2.37199400 | 5.16270800  |
| C              | 3.42875600  | -2.40728700 | 3.83158300  |
| C              | 2.50888700  | -2.33177700 | 2.77903800  |
| C              | 1.15132300  | -2.23112300 | 3.07730300  |
| C              | 0.71113600  | -2.22156200 | 4.42700400  |

|   |             |             |             |
|---|-------------|-------------|-------------|
| C | 1.63238800  | -2.28301400 | 5.46960500  |
| H | 2.84530100  | -2.35554900 | 1.74724300  |
| H | 1.30133700  | -2.27787200 | 6.50520600  |
| C | -0.01719000 | -2.11747200 | 2.18163800  |
| C | -1.19116600 | -2.21227300 | 3.07237300  |
| C | -2.54896900 | -2.29094800 | 2.76853700  |
| C | -3.47425100 | -2.35202100 | 3.81730600  |
| C | -3.04675700 | -2.32380600 | 5.15022500  |
| C | -1.68295400 | -2.25659700 | 5.46269100  |
| C | -0.75653400 | -2.20982100 | 4.42389800  |
| H | -2.88176800 | -2.30929700 | 1.73549200  |
| H | -3.77995000 | -2.36511300 | 5.95147300  |
| H | -1.35609100 | -2.25676500 | 6.49963300  |
| C | -0.04700800 | -4.34434100 | -1.92771900 |
| C | -0.03429900 | -4.47804400 | -3.33162300 |
| C | -0.06793300 | -5.47958300 | -1.09559800 |
| C | -0.04570300 | -5.76325300 | -3.88112500 |
| C | -0.07862600 | -6.74588400 | -1.69091400 |
| C | -0.07108700 | -6.90890600 | -3.07922500 |
| H | -0.03304800 | -5.87109200 | -4.96393400 |
| H | -0.09188800 | -7.62636700 | -1.05161100 |
| C | -4.90408200 | 0.39872200  | -0.20252100 |
| C | -5.48359900 | 0.53299000  | 1.07577900  |
| C | -5.71524600 | 0.30557200  | -1.35287200 |
| C | -6.87801400 | 0.51916700  | 1.18413200  |
| C | -7.10463700 | 0.30531400  | -1.19537200 |
| C | -7.70551500 | 0.39661200  | 0.06408600  |
| H | -7.32788900 | 0.61488000  | 2.17047100  |
| H | -7.73319100 | 0.23931900  | -2.08127600 |
| C | 0.05713200  | 5.30513100  | -0.42960100 |
| C | 0.03410400  | 6.04048400  | 0.77045900  |
| C | 0.09053100  | 5.95718700  | -1.67730400 |
| C | 0.04505700  | 7.43698600  | 0.70061800  |
| C | 0.09919300  | 7.35541400  | -1.69968300 |
| C | 0.07978000  | 8.11226100  | -0.52374600 |
| H | 0.02447500  | 8.01057600  | 1.62523600  |
| H | 0.12070000  | 7.86540700  | -2.66080200 |
| C | 4.91029700  | 0.29279700  | -0.19833800 |
| C | 5.48970000  | 0.41736300  | 1.08098100  |
| C | 5.72209300  | 0.17823900  | -1.34641800 |
| C | 6.88318200  | 0.37109600  | 1.19299900  |
| C | 7.11062100  | 0.14605300  | -1.18534400 |
| C | 7.71039200  | 0.22622100  | 0.07549000  |
| H | 7.33256200  | 0.45883800  | 2.18029400  |



|   |             |             |             |
|---|-------------|-------------|-------------|
| H | 7.73972200  | 0.06342800  | -2.06947400 |
| C | -0.07270400 | -5.34299000 | 0.40956700  |
| H | 0.81490600  | -4.80807700 | 0.76768600  |
| H | -0.94521700 | -4.77932400 | 0.76050200  |
| H | -0.09072900 | -6.32318500 | 0.89522100  |
| C | -0.00282200 | -3.25550400 | -4.22053500 |
| H | -0.85877400 | -2.59728100 | -4.03291100 |
| H | 0.88838000  | -2.64524300 | -4.03398600 |
| H | -0.01075700 | -3.53699900 | -5.27782200 |
| C | -0.11759800 | -8.28594600 | -3.69970200 |
| H | 0.30389700  | -9.04328700 | -3.03006500 |
| H | -1.15130300 | -8.58397200 | -3.92068800 |
| H | 0.43778300  | -8.31949800 | -4.64347900 |
| C | 4.63658700  | 0.64374200  | 2.30822200  |
| H | 4.26939300  | 1.67753800  | 2.33917300  |
| H | 3.75494500  | -0.00182600 | 2.32879300  |
| H | 5.20712300  | 0.46301000  | 3.22438000  |
| C | 5.11466400  | 0.11446300  | -2.73062700 |
| H | 4.64227800  | -0.85659400 | -2.92017900 |
| H | 4.33294000  | 0.87085100  | -2.86194700 |
| H | 5.87746100  | 0.27225500  | -3.49920300 |
| C | 9.21135700  | 0.14306700  | 0.22645100  |
| H | 9.72649400  | 0.54629600  | -0.65224000 |
| H | 9.55805600  | 0.69462800  | 1.10707100  |
| H | 9.53788900  | -0.89884900 | 0.34533600  |
| C | -0.00597500 | 5.33060500  | 2.10446000  |
| H | -0.90393100 | 4.70781000  | 2.19698700  |
| H | 0.85329100  | 4.65985500  | 2.22426100  |
| H | 0.00032000  | 6.04432100  | 2.93379000  |
| C | 0.12517600  | 9.62199900  | -0.57403900 |
| H | -0.34583300 | 10.00756900 | -1.48477200 |
| H | -0.38386500 | 10.06842400 | 0.28714300  |
| H | 1.16141000  | 9.98587900  | -0.56433900 |
| C | 0.11669700  | 5.15749200  | -2.95967600 |
| H | 1.01267600  | 4.52823000  | -3.01862300 |
| H | -0.73782100 | 4.47421800  | -3.02602800 |
| H | 0.10151800  | 5.81367300  | -3.83515700 |
| C | -4.62793400 | 0.73445700  | 2.30557000  |
| H | -5.20755200 | 0.57539300  | 3.22005300  |
| H | -3.76848200 | 0.05962500  | 2.33087200  |
| H | -4.22620300 | 1.75534500  | 2.33531000  |
| C | -5.10565500 | 0.23067800  | -2.73555500 |
| H | -4.30735000 | 0.97013100  | -2.86357700 |
| H | -4.65376600 | -0.75009200 | -2.92519500 |

|   |             |             |             |
|---|-------------|-------------|-------------|
| H | -5.86270700 | 0.40599600  | -3.50600300 |
| C | -9.20838700 | 0.34855100  | 0.21150400  |
| H | -9.54464200 | 0.91369300  | 1.08758800  |
| H | -9.71209100 | 0.75750600  | -0.67112800 |
| H | -9.55883900 | -0.68483700 | 0.33663400  |
| H | -0.01939500 | -2.66152300 | 1.24216800  |
| H | -4.53564800 | -2.41554900 | 3.59247500  |
| H | 4.48990900  | -2.48781600 | 3.61114900  |
| H | 3.72535600  | -2.42484400 | 5.96698600  |

**cat2/a9**

|    |             |             |             |
|----|-------------|-------------|-------------|
| C  | 2.63607800  | -0.11727300 | -0.75881000 |
| C  | 3.74816700  | -1.03790900 | -0.81225000 |
| C  | 3.22219200  | -2.28858100 | -0.76548500 |
| C  | 1.78860800  | -2.13533700 | -0.67097800 |
| N  | 1.45165000  | -0.80414400 | -0.61538900 |
| H  | 4.78434900  | -0.74224500 | -0.88878500 |
| H  | 3.73553500  | -3.23876100 | -0.79451400 |
| C  | -2.49611500 | -2.20897100 | -0.38922300 |
| C  | -2.66225200 | -3.64174300 | -0.42863500 |
| C  | -1.42099500 | -4.17628400 | -0.59453000 |
| C  | -0.49522700 | -3.07059200 | -0.61883600 |
| N  | -1.16894300 | -1.88337300 | -0.49947500 |
| H  | -3.61186300 | -4.15228100 | -0.35686000 |
| H  | -1.14180600 | -5.21607600 | -0.68258800 |
| C  | -0.33119400 | 2.99392000  | -0.93979000 |
| C  | 0.57260100  | 4.09685000  | -1.16851000 |
| C  | 1.82664000  | 3.57198000  | -1.21722900 |
| C  | 1.68785300  | 2.15066400  | -1.00206500 |
| N  | 0.37260000  | 1.81902700  | -0.84235000 |
| H  | 0.26763900  | 5.12748300  | -1.27929600 |
| H  | 2.76596600  | 4.08106500  | -1.37696600 |
| C  | -2.61039800 | 2.08003800  | -0.64879400 |
| C  | -4.03588300 | 2.24576900  | -0.46335100 |
| C  | -4.55262700 | 0.99892700  | -0.29485300 |
| C  | -3.44245900 | 0.07616000  | -0.38666000 |
| N  | -2.27555200 | 0.75783200  | -0.60729100 |
| H  | -4.55007500 | 3.19636100  | -0.46200900 |
| H  | -5.58080800 | 0.71006900  | -0.12974600 |
| C  | 2.76836400  | 1.25612100  | -0.97746000 |
| C  | -3.56850400 | -1.31189100 | -0.29146600 |
| C  | 0.89486300  | -3.21080500 | -0.72746000 |
| C  | -1.71636100 | 3.14262600  | -0.83369200 |
| Fe | -0.38866300 | -0.02809700 | -0.60185500 |

|    |             |             |             |
|----|-------------|-------------|-------------|
| C1 | -0.48336600 | -0.21451700 | -2.94216000 |
| O  | -0.60462200 | 0.23492900  | 1.09893600  |
| H  | 0.29640600  | -0.05884300 | 1.94212300  |
| C  | 4.88509700  | -1.57441100 | 3.09085400  |
| C  | 3.90913400  | -2.45949600 | 2.62413700  |
| C  | 2.56330700  | -2.08003800 | 2.57658200  |
| C  | 2.19060100  | -0.80687300 | 3.00132800  |
| C  | 3.18929300  | 0.09668300  | 3.44080400  |
| C  | 4.52905500  | -0.28349300 | 3.49608900  |
| H  | 5.92655500  | -1.88287400 | 3.12325900  |
| H  | 1.82949500  | -2.75825800 | 2.16758100  |
| H  | 5.28776300  | 0.41535700  | 3.83909500  |
| C  | 0.84048200  | -0.15663500 | 3.08977800  |
| C  | 1.17052500  | 1.26590300  | 3.44693500  |
| C  | 0.36699100  | 2.40745600  | 3.45148700  |
| C  | 0.93193800  | 3.63981500  | 3.79980500  |
| C  | 2.28886900  | 3.74041900  | 4.12804000  |
| C  | 3.11279300  | 2.61234300  | 4.07611800  |
| C  | 2.55429000  | 1.38798900  | 3.71360000  |
| H  | -0.67184500 | 2.35238800  | 3.15126100  |
| H  | 4.17556500  | 2.69467200  | 4.28849500  |
| C  | -0.26113100 | -0.90049700 | 3.91961900  |
| C  | -0.65187400 | -2.23321800 | 3.24698400  |
| C  | 0.29819100  | -1.18287100 | 5.33243100  |
| C  | -1.54078300 | -0.05118200 | 4.05742200  |
| H  | -0.94633800 | -2.07070800 | 2.20588200  |
| H  | 0.16122000  | -2.96231000 | 3.27789100  |
| H  | -1.49954000 | -2.68004800 | 3.78014700  |
| H  | 0.59335300  | -0.25132200 | 5.82866700  |
| H  | -0.46844200 | -1.66891900 | 5.94842400  |
| H  | 1.17252200  | -1.84042000 | 5.29192400  |
| H  | -2.31514600 | -0.64208000 | 4.56109200  |
| H  | -1.36834700 | 0.84311700  | 4.66276200  |
| H  | -1.91646300 | 0.24780400  | 3.07554100  |
| C  | 1.44249600  | -4.56633300 | -1.05914600 |
| C  | 1.77578400  | -4.82103500 | -2.41105700 |
| C  | 1.59900000  | -5.57270500 | -0.08800100 |
| C  | 2.26875200  | -6.08128700 | -2.75532900 |
| C  | 2.09879300  | -6.82077400 | -0.48165100 |
| C  | 2.43927700  | -7.09579500 | -1.80656500 |
| H  | 2.52089700  | -6.27904300 | -3.79546100 |
| H  | 2.22065400  | -7.59686400 | 0.27163400  |
| C  | -4.93931500 | -1.88100800 | -0.09853400 |
| C  | -5.38166400 | -2.20146100 | 1.19938200  |

|   |             |             |             |
|---|-------------|-------------|-------------|
| C | -5.76803100 | -2.09769700 | -1.21609600 |
| C | -6.66316000 | -2.73728300 | 1.35865900  |
| C | -7.04108900 | -2.63951200 | -1.01110900 |
| C | -7.50817000 | -2.96206300 | 0.26690300  |
| H | -7.00894300 | -2.98660400 | 2.36004200  |
| H | -7.68223500 | -2.81558400 | -1.87263900 |
| C | -2.28371400 | 4.52547000  | -0.90798700 |
| C | -2.35414900 | 5.31194500  | 0.25777000  |
| C | -2.75167300 | 5.02006200  | -2.14024800 |
| C | -2.89952200 | 6.59624500  | 0.16965500  |
| C | -3.28734900 | 6.31112000  | -2.18372500 |
| C | -3.36802500 | 7.11478000  | -1.04196000 |
| H | -2.96200600 | 7.20518200  | 1.06951700  |
| H | -3.65156500 | 6.69752700  | -3.13362300 |
| C | 4.11775900  | 1.78838000  | -1.35381600 |
| C | 4.93054700  | 2.43665100  | -0.40567700 |
| C | 4.54508300  | 1.64900700  | -2.69174200 |
| C | 6.17268000  | 2.93562800  | -0.81172600 |
| C | 5.79338500  | 2.16506000  | -3.05261200 |
| C | 6.62096500  | 2.81278300  | -2.12972600 |
| H | 6.80436400  | 3.43229600  | -0.07778700 |
| H | 6.12598200  | 2.06043200  | -4.08361500 |
| C | 1.27584600  | -5.34078300 | 1.37158700  |
| H | 2.14837400  | -4.95187300 | 1.91188700  |
| H | 0.45960700  | -4.62673900 | 1.50705700  |
| H | 0.98758500  | -6.27701000 | 1.86089100  |
| C | 1.61507100  | -3.75513600 | -3.47296000 |
| H | 0.66566400  | -3.21659500 | -3.38447100 |
| H | 2.40242200  | -2.99550800 | -3.39062400 |
| H | 1.67412300  | -4.19225100 | -4.47449800 |
| C | 2.94649500  | -8.45796000 | -2.21891400 |
| H | 3.30185600  | -9.03346400 | -1.35779000 |
| H | 2.15419700  | -9.04411100 | -2.70313900 |
| H | 3.77092100  | -8.37668400 | -2.93661500 |
| C | 4.47723200  | 2.57183800  | 1.02651300  |
| H | 3.51214100  | 3.08380700  | 1.10505500  |
| H | 4.34530300  | 1.58891100  | 1.48915200  |
| H | 5.20408500  | 3.13161800  | 1.62333800  |
| C | 3.68187600  | 0.94769700  | -3.71661600 |
| H | 3.63812100  | -0.13133500 | -3.52405500 |
| H | 2.64572800  | 1.30278300  | -3.69422500 |
| H | 4.07572400  | 1.09450500  | -4.72696700 |
| C | 7.95020500  | 3.39108800  | -2.55679500 |
| H | 7.82454800  | 4.39382800  | -2.98691900 |

|   |             |             |             |
|---|-------------|-------------|-------------|
| H | 8.63940200  | 3.48306600  | -1.71047500 |
| H | 8.43110100  | 2.76987400  | -3.32064400 |
| C | -1.85586200 | 4.76880900  | 1.57732600  |
| H | -2.37557100 | 3.84072700  | 1.84527000  |
| H | -0.78846700 | 4.52440900  | 1.53078700  |
| H | -2.00750600 | 5.49076700  | 2.38599900  |
| C | -3.92078100 | 8.51912000  | -1.12072000 |
| H | -4.66927300 | 8.61225000  | -1.91511800 |
| H | -4.38784400 | 8.82066400  | -0.17676400 |
| H | -3.12517800 | 9.24489500  | -1.33660600 |
| C | -2.67639400 | 4.16778300  | -3.38627700 |
| H | -1.64848600 | 3.84365100  | -3.58690100 |
| H | -3.27190700 | 3.25336400  | -3.27913200 |
| H | -3.04155800 | 4.71282200  | -4.26197700 |
| C | -4.48317600 | -1.97219900 | 2.39293000  |
| H | -3.57407800 | -2.58141700 | 2.32994200  |
| H | -4.15049600 | -0.92935800 | 2.44972500  |
| H | -4.99455400 | -2.21915800 | 3.32838900  |
| C | -5.28743500 | -1.75489100 | -2.60769900 |
| H | -5.12766800 | -0.67545800 | -2.71715700 |
| H | -4.32670500 | -2.23365700 | -2.82953900 |
| H | -6.01151700 | -2.07006300 | -3.36507600 |
| C | -8.90088100 | -3.51336100 | 0.46722200  |
| H | -8.94563400 | -4.18754300 | 1.32961300  |
| H | -9.62280500 | -2.70564600 | 0.64817800  |
| H | -9.24503900 | -4.06548500 | -0.41400000 |
| H | 4.19754800  | -3.44749200 | 2.27491100  |
| H | 0.30884700  | 4.52976800  | 3.80581800  |
| H | 2.70940100  | 4.70460600  | 4.40105300  |

**cat2/a10**

|   |             |             |             |
|---|-------------|-------------|-------------|
| C | 3.01764400  | 0.95549800  | -0.73399000 |
| C | 4.33023700  | 0.35395500  | -0.72143200 |
| C | 4.14286500  | -0.99446300 | -0.73780600 |
| C | 2.71737000  | -1.21295700 | -0.75057300 |
| N | 2.05099500  | -0.01945500 | -0.74560500 |
| H | 5.25920800  | 0.90563300  | -0.70324500 |
| H | 4.88406200  | -1.78040900 | -0.72974400 |
| C | -1.41253500 | -2.38379900 | -0.92184300 |
| C | -1.20235200 | -3.81271300 | -0.90624300 |
| C | 0.13947600  | -4.00917400 | -0.80481900 |
| C | 0.74560700  | -2.70018400 | -0.74290200 |
| N | -0.22261500 | -1.72311600 | -0.77200600 |
| H | -1.98903400 | -4.54904000 | -0.98271500 |

|    |             |             |             |
|----|-------------|-------------|-------------|
| H  | 0.68674800  | -4.94063500 | -0.78832400 |
| C  | -0.62902700 | 3.24220600  | -0.78938800 |
| C  | -0.02973000 | 4.55420600  | -0.68206600 |
| C  | 1.31670100  | 4.36611200  | -0.67898300 |
| C  | 1.53403500  | 2.93758300  | -0.76069300 |
| N  | 0.34098600  | 2.27816200  | -0.84157000 |
| H  | -0.58390100 | 5.48044500  | -0.62949700 |
| H  | 2.10247700  | 5.10554500  | -0.62070900 |
| C  | -2.58484200 | 1.74923700  | -1.01708900 |
| C  | -3.99675700 | 1.54119800  | -1.24135900 |
| C  | -4.17513000 | 0.19990000  | -1.37955200 |
| C  | -2.87831800 | -0.41001600 | -1.19737900 |
| N  | -1.92418800 | 0.55363400  | -1.00415100 |
| H  | -4.73243100 | 2.33054700  | -1.29762800 |
| H  | -5.08916400 | -0.34371500 | -1.56950700 |
| C  | 2.79959000  | 2.33773000  | -0.72731800 |
| C  | -2.66087500 | -1.79033100 | -1.16856700 |
| C  | 2.12560400  | -2.48474400 | -0.76805100 |
| C  | -2.00613500 | 3.01603500  | -0.85493400 |
| Fe | 0.05702500  | 0.26719000  | -0.78492100 |
| Cl | 0.19623100  | 0.19888700  | -3.14485300 |
| O  | -0.06259200 | 0.52910300  | 0.90638200  |
| H  | -0.11697500 | -0.34633100 | 1.77420800  |
| C  | -2.37925700 | 2.11647700  | 4.98946700  |
| C  | -1.09391200 | 2.49321900  | 4.57649200  |
| C  | -0.25322500 | 1.57810900  | 3.93463500  |
| C  | -0.71483900 | 0.28232700  | 3.71904200  |
| C  | -2.00865100 | -0.10293500 | 4.14230400  |
| C  | -2.84528900 | 0.81434800  | 4.77664300  |
| H  | -3.01981300 | 2.84282000  | 5.48285700  |
| H  | -0.74962100 | 3.50886000  | 4.75279800  |
| H  | 0.73909500  | 1.86756300  | 3.60215600  |
| H  | -3.84123600 | 0.52532300  | 5.10314400  |
| C  | -0.06042900 | -0.85021400 | 2.99714100  |
| C  | -1.04487800 | -1.95739900 | 3.10023700  |
| C  | -0.96098100 | -3.26904600 | 2.63687300  |
| C  | -2.01696600 | -4.14934700 | 2.89617700  |
| C  | -3.14313100 | -3.72014600 | 3.60968200  |
| C  | -3.24835000 | -2.39570300 | 4.05098700  |
| C  | -2.20304200 | -1.51247000 | 3.78770500  |
| H  | -0.08863500 | -3.59594400 | 2.08106700  |
| H  | -1.96142300 | -5.17450800 | 2.54041500  |
| H  | -3.95167400 | -4.41850500 | 3.80883100  |
| H  | -4.12969200 | -2.06555200 | 4.59509400  |

|   |             |             |             |
|---|-------------|-------------|-------------|
| C | 3.02455300  | -3.66945600 | -0.94334800 |
| C | 3.47995000  | -3.97454300 | -2.24474200 |
| C | 3.40803500  | -4.45951600 | 0.15501800  |
| C | 4.31985500  | -5.07771500 | -2.41755000 |
| C | 4.25795400  | -5.54965800 | -0.06521300 |
| C | 4.72068500  | -5.87779500 | -1.34171700 |
| H | 4.67283800  | -5.31687500 | -3.41885200 |
| H | 4.56562100  | -6.15466700 | 0.78564600  |
| C | -3.81640200 | -2.68889200 | -1.47734300 |
| C | -4.78508100 | -2.96353800 | -0.49348400 |
| C | -3.92042300 | -3.24654200 | -2.76882300 |
| C | -5.84614100 | -3.81563000 | -0.81621900 |
| C | -5.00373100 | -4.08527900 | -3.04823400 |
| C | -5.97489300 | -4.38378600 | -2.08705100 |
| H | -6.58933500 | -4.04084900 | -0.05359300 |
| H | -5.08995500 | -4.51719200 | -4.04346900 |
| C | -2.92432400 | 4.19036700  | -0.73541500 |
| C | -3.45199100 | 4.51456800  | 0.53012000  |
| C | -3.25412600 | 4.95031000  | -1.87366100 |
| C | -4.31217400 | 5.61246300  | 0.63225000  |
| C | -4.12098200 | 6.03736300  | -1.72446600 |
| C | -4.66182600 | 6.38260300  | -0.48153100 |
| H | -4.71896200 | 5.87174100  | 1.60778700  |
| H | -4.37978000 | 6.62810000  | -2.60110100 |
| C | 3.99628500  | 3.23493100  | -0.67405400 |
| C | 4.45140300  | 3.71957300  | 0.56778600  |
| C | 4.65312300  | 3.58436000  | -1.86938700 |
| C | 5.57359600  | 4.55308100  | 0.59122800  |
| C | 5.77137600  | 4.42152500  | -1.79869200 |
| C | 6.24582000  | 4.91708800  | -0.58034000 |
| H | 5.93187900  | 4.92662300  | 1.54857900  |
| H | 6.28334400  | 4.69310200  | -2.71973200 |
| C | 2.90438600  | -4.15619900 | 1.54518000  |
| H | 2.82978600  | -3.08287500 | 1.73129700  |
| H | 1.90329600  | -4.57937400 | 1.69990900  |
| H | 3.56015200  | -4.58405600 | 2.30904300  |
| C | 3.07976300  | -3.12222200 | -3.42816200 |
| H | 1.99993300  | -2.93915700 | -3.45507000 |
| H | 3.55405700  | -2.13430600 | -3.38436400 |
| H | 3.37328600  | -3.59611600 | -4.36980300 |
| C | 5.60896200  | -7.08016800 | -1.56257500 |
| H | 6.17405200  | -7.33392500 | -0.65926800 |
| H | 5.01636300  | -7.96337400 | -1.83651400 |
| H | 6.32461400  | -6.90668700 | -2.37388800 |

|   |             |             |             |
|---|-------------|-------------|-------------|
| C | 3.73914500  | 3.34758800  | 1.84880900  |
| H | 2.69461100  | 3.68162800  | 1.83341100  |
| H | 3.71689400  | 2.26224600  | 1.99845400  |
| H | 4.22769600  | 3.79748400  | 2.71828600  |
| C | 4.16189200  | 3.05741400  | -3.19834800 |
| H | 4.25430900  | 1.96605800  | -3.25236300 |
| H | 3.10045500  | 3.28359400  | -3.35212400 |
| H | 4.72886900  | 3.48875500  | -4.02877900 |
| C | 7.43587000  | 5.84722800  | -0.53151900 |
| H | 7.11689100  | 6.89775600  | -0.56147000 |
| H | 8.01471800  | 5.71042700  | 0.38852900  |
| H | 8.10658700  | 5.68622500  | -1.38228600 |
| C | -3.09040000 | 3.69775200  | 1.74957900  |
| H | -3.42518200 | 2.65792500  | 1.65457900  |
| H | -2.00653400 | 3.65233100  | 1.90313100  |
| H | -3.54132100 | 4.11356200  | 2.65524100  |
| C | -5.62405900 | 7.54057200  | -0.35148600 |
| H | -6.65869500 | 7.21501300  | -0.52447300 |
| H | -5.58586500 | 7.98419100  | 0.64932500  |
| H | -5.40601600 | 8.32835800  | -1.08092000 |
| C | -2.68046700 | 4.59383300  | -3.22591800 |
| H | -1.58787900 | 4.68696300  | -3.23094100 |
| H | -2.90475700 | 3.55436000  | -3.49314900 |
| H | -3.08141300 | 5.24299500  | -4.01013600 |
| C | -4.69022600 | -2.34152300 | 0.87895500  |
| H | -3.66514000 | -2.34413500 | 1.25689800  |
| H | -5.01925600 | -1.29463700 | 0.86219200  |
| H | -5.31355200 | -2.87725000 | 1.60039600  |
| C | -2.87981400 | -2.96100500 | -3.82898700 |
| H | -2.59825300 | -1.90277000 | -3.85680400 |
| H | -1.95543300 | -3.51892000 | -3.63401300 |
| H | -3.24259300 | -3.24901100 | -4.82050400 |
| C | -7.14951500 | -5.27278100 | -2.42405200 |
| H | -7.52145400 | -5.79975600 | -1.53862200 |
| H | -7.98500900 | -4.68603900 | -2.82906500 |
| H | -6.88324000 | -6.02111300 | -3.17849500 |
| C | 1.39743900  | -1.11151000 | 3.24437900  |
| C | 2.39158900  | -0.37288200 | 2.58415800  |
| C | 1.79261200  | -2.06518700 | 4.19802000  |
| C | 3.74229900  | -0.58447600 | 2.86729400  |
| H | 2.09205100  | 0.34798900  | 1.83267700  |
| C | 3.14181200  | -2.26512900 | 4.49041900  |
| H | 1.03352400  | -2.64385400 | 4.71587300  |
| C | 4.12347500  | -1.52755800 | 3.82390800  |



|   |            |             |            |
|---|------------|-------------|------------|
| H | 4.49579100 | -0.02415900 | 2.32108100 |
| H | 3.42596200 | -3.00306400 | 5.23645700 |
| H | 5.17527200 | -1.69351300 | 4.04141200 |

**cat2/a11**

|    |             |             |             |
|----|-------------|-------------|-------------|
| C  | 2.69542200  | -1.00368600 | -0.57912500 |
| C  | 3.32962500  | -2.27401500 | -0.84935800 |
| C  | 2.35656500  | -3.10910300 | -1.31216100 |
| C  | 1.11745400  | -2.37085000 | -1.25668500 |
| N  | 1.34901000  | -1.09581900 | -0.80899800 |
| H  | 4.38295000  | -2.47559200 | -0.71837600 |
| H  | 2.44606900  | -4.13633500 | -1.63622800 |
| C  | -2.78104100 | -0.73068700 | -0.59550400 |
| C  | -3.53664300 | -1.93209500 | -0.86902200 |
| C  | -2.64855900 | -2.85969400 | -1.32677300 |
| C  | -1.34290700 | -2.24749300 | -1.26561800 |
| N  | -1.44953700 | -0.95554200 | -0.81904300 |
| H  | -4.60549800 | -2.02810100 | -0.74407800 |
| H  | -2.83765200 | -3.87363400 | -1.65000000 |
| C  | 1.38881500  | 3.08824200  | -0.55540500 |
| C  | 2.69305400  | 3.69691700  | -0.41504000 |
| C  | 3.57777700  | 2.68083300  | -0.22037700 |
| C  | 2.81756500  | 1.45121900  | -0.28935800 |
| N  | 1.49512000  | 1.72760900  | -0.48783300 |
| H  | 2.88050300  | 4.76088700  | -0.44379800 |
| H  | 4.64673000  | 2.73484500  | -0.07059700 |
| C  | -1.07528400 | 3.21251100  | -0.56424800 |
| C  | -2.31428100 | 3.94714900  | -0.43495000 |
| C  | -3.29616700 | 3.02370400  | -0.24464900 |
| C  | -2.66081600 | 1.72504000  | -0.30758800 |
| N  | -1.31636000 | 1.86899700  | -0.49742100 |
| H  | -2.39636400 | 5.02424200  | -0.46752500 |
| H  | -4.35555700 | 3.18300100  | -0.10189000 |
| C  | 3.39107800  | 0.17277400  | -0.25427800 |
| C  | -3.35810700 | 0.50963300  | -0.27448800 |
| C  | -0.14223600 | -2.91473900 | -1.54024400 |
| C  | 0.19018400  | 3.80747900  | -0.64987900 |
| Fe | 0.01859900  | 0.37706700  | -0.59505200 |
| Cl | 0.04580700  | 0.67501400  | -2.95150600 |
| O  | 0.00460200  | 0.30300200  | 1.12250900  |
| H  | -0.05484700 | -0.88271600 | 1.58928100  |
| C  | 3.42184600  | -2.41629100 | 4.50492300  |
| C  | 2.30513200  | -1.72464900 | 4.98406800  |
| C  | 2.25778900  | -2.84674000 | 2.43292000  |

|   |             |             |             |
|---|-------------|-------------|-------------|
| C | 3.39878700  | -2.97258600 | 3.22327400  |
| H | 2.32412300  | -1.28725300 | 5.97993700  |
| H | 4.26793500  | -3.49933600 | 2.83877600  |
| C | -0.11323800 | -2.04786000 | 2.11632700  |
| C | 1.12755100  | -2.16821100 | 2.91264500  |
| C | 1.16085800  | -1.58826400 | 4.19816100  |
| C | -0.05951100 | -0.81956100 | 4.65937500  |
| H | -0.14165100 | -2.68307200 | 1.23226300  |
| H | -0.05633800 | -0.69373800 | 5.74804800  |
| H | -0.00792100 | 0.19199600  | 4.22353700  |
| H | 2.23777100  | -3.27126600 | 1.43457500  |
| C | -1.36409800 | -2.04670100 | 2.90635600  |
| C | -2.55277200 | -2.61214300 | 2.42129200  |
| C | -3.70570000 | -2.62187700 | 3.20454200  |
| C | -3.68148500 | -2.06211600 | 4.48457100  |
| C | -2.50436400 | -1.48410100 | 4.96968100  |
| C | -1.34737000 | -1.46405200 | 4.19094800  |
| H | -2.56874800 | -3.04024600 | 1.42433300  |
| H | -4.62043900 | -3.06084800 | 2.81567100  |
| H | -4.57543200 | -2.07123500 | 5.10257800  |
| H | -2.48590200 | -1.04473900 | 5.96471900  |
| C | -0.20726200 | -4.27010500 | -2.17074500 |
| C | -0.21799800 | -4.34133000 | -3.57942500 |
| C | -0.24967400 | -5.44096500 | -1.39070900 |
| C | -0.26856800 | -5.60016000 | -4.18496700 |
| C | -0.30066600 | -6.67916400 | -2.04061600 |
| C | -0.31282800 | -6.77975500 | -3.43471500 |
| H | -0.27212700 | -5.65978300 | -5.27160000 |
| H | -0.33044300 | -7.58669200 | -1.44086300 |
| C | 4.84182600  | 0.06960500  | 0.09202800  |
| C | 5.21350000  | 0.13213500  | 1.45039100  |
| C | 5.81666400  | -0.06204400 | -0.91763300 |
| C | 6.56661900  | 0.00007100  | 1.77899200  |
| C | 7.15806100  | -0.18066300 | -0.54113400 |
| C | 7.55141600  | -0.16793600 | 0.80127200  |
| H | 6.85740000  | 0.03730600  | 2.82707500  |
| H | 7.91527000  | -0.27785700 | -1.31676400 |
| C | -4.81249400 | 0.54867800  | 0.06930600  |
| C | -5.17670400 | 0.64108000  | 1.42823500  |
| C | -5.79498100 | 0.51037800  | -0.94027300 |
| C | -6.53592900 | 0.63194600  | 1.75690500  |
| C | -7.14181900 | 0.51350000  | -0.56367900 |
| C | -7.53215800 | 0.55686100  | 0.77880100  |
| H | -6.82210100 | 0.69186600  | 2.80522700  |

|   |             |             |             |
|---|-------------|-------------|-------------|
| H | -7.90461700 | 0.48793100  | -1.33943400 |
| C | 0.26720000  | 5.29409200  | -0.79037300 |
| C | 0.34379300  | 5.84988200  | -2.08256100 |
| C | 0.27131900  | 6.11698200  | 0.35142900  |
| C | 0.42078800  | 7.24021400  | -2.20792900 |
| C | 0.35023200  | 7.50271200  | 0.17888700  |
| C | 0.42207200  | 8.08293000  | -1.09138900 |
| H | 0.48259600  | 7.67521400  | -3.20358900 |
| H | 0.35731400  | 8.14319500  | 1.05867500  |
| C | -0.17663300 | -3.08108900 | -4.41288500 |
| H | -1.04373800 | -2.44069400 | -4.21445200 |
| H | 0.70114500  | -2.46819200 | -4.17947100 |
| H | -0.16018800 | -3.31605500 | -5.48144400 |
| C | -0.23854000 | -5.37242800 | 0.11907800  |
| H | 0.66737400  | -4.88207600 | 0.49359500  |
| H | -1.08997800 | -4.79756800 | 0.50146500  |
| H | -0.28473900 | -6.37208700 | 0.56124500  |
| C | -0.40086900 | -8.12566800 | -4.11611000 |
| H | -1.44180800 | -8.37671800 | -4.36031700 |
| H | 0.16319100  | -8.13711300 | -5.05536200 |
| H | -0.01336300 | -8.92640000 | -3.47715400 |
| C | 4.18430300  | 0.38626600  | 2.52807300  |
| H | 3.85946200  | 1.43464400  | 2.50891500  |
| H | 3.28756200  | -0.22525900 | 2.39697900  |
| H | 4.59145600  | 0.17422500  | 3.51997900  |
| C | 5.42886600  | -0.04151800 | -2.37954400 |
| H | 4.86528800  | -0.93736000 | -2.66443700 |
| H | 4.78439800  | 0.81575800  | -2.60598800 |
| H | 6.31446800  | 0.01755000  | -3.01956500 |
| C | 9.00279800  | -0.34498900 | 1.18270600  |
| H | 9.22620100  | 0.12761000  | 2.14527900  |
| H | 9.25955800  | -1.40900200 | 1.27425600  |
| H | 9.67159000  | 0.08549200  | 0.42916200  |
| C | 0.19955700  | 5.51176800  | 1.73492200  |
| H | -0.72027300 | 4.92939400  | 1.86678300  |
| H | 1.03487200  | 4.82325700  | 1.91091600  |
| H | 0.22669400  | 6.28580500  | 2.50790800  |
| C | 0.35009100  | 4.95544500  | -3.30094800 |
| H | 1.21637500  | 4.28349100  | -3.29865900 |
| H | -0.53254100 | 4.30623000  | -3.32843400 |
| H | 0.37467400  | 5.54362900  | -4.22329600 |
| C | 0.47171300  | 9.58422900  | -1.25735400 |
| H | -0.53468700 | 9.99837100  | -1.40558400 |
| H | 0.89835800  | 10.07288900 | -0.37477100 |

|   |             |             |             |
|---|-------------|-------------|-------------|
| H | 1.07126500  | 9.87175200  | -2.12814100 |
| C | -5.40640100 | 0.49911300  | -2.40208300 |
| H | -4.69304700 | 1.30023800  | -2.62782100 |
| H | -4.91892600 | -0.44027700 | -2.68721000 |
| H | -6.28359600 | 0.63186500  | -3.04267500 |
| C | -4.12716000 | 0.79573200  | 2.50518900  |
| H | -3.29462600 | 0.09901900  | 2.37484200  |
| H | -3.70099700 | 1.80708200  | 2.48329700  |
| H | -4.55229600 | 0.62671000  | 3.49772300  |
| C | -8.99308500 | 0.50969000  | 1.16188400  |
| H | -9.62580100 | 0.96185700  | 0.39029000  |
| H | -9.33268000 | -0.52643800 | 1.29468800  |
| H | -9.17866900 | 1.03539200  | 2.10487000  |
| H | 4.30641800  | -2.51567600 | 5.12845200  |

**cat2/a12**

|   |             |             |             |
|---|-------------|-------------|-------------|
| C | 2.74450000  | -0.86735100 | -0.62855500 |
| C | 3.42065000  | -2.11108100 | -0.91499400 |
| C | 2.47312000  | -2.98638100 | -1.35669500 |
| C | 1.20511200  | -2.30275900 | -1.27918800 |
| N | 1.39632200  | -1.01814800 | -0.83410800 |
| H | 4.48387500  | -2.27016900 | -0.80671000 |
| H | 2.59861400  | -4.00928300 | -1.68273900 |
| C | -2.76234000 | -0.81260900 | -0.63178000 |
| C | -3.46216000 | -2.04421800 | -0.91414300 |
| C | -2.53151700 | -2.93877300 | -1.35315900 |
| C | -1.25069400 | -2.27921500 | -1.27820200 |
| N | -1.41717000 | -0.99019300 | -0.83620900 |
| H | -4.52835500 | -2.18239100 | -0.80630800 |
| H | -2.67666300 | -3.95997900 | -1.67632400 |
| C | 1.25886200  | 3.15189400  | -0.52532100 |
| C | 2.53786200  | 3.81143600  | -0.38798700 |
| C | 3.46825800  | 2.83296200  | -0.22082700 |
| C | 2.76543400  | 1.57147700  | -0.30253800 |
| N | 1.42834500  | 1.79436100  | -0.48113300 |
| H | 2.67796700  | 4.88300000  | -0.40138200 |
| H | 4.53579100  | 2.93156300  | -0.08365500 |
| C | -1.19693000 | 3.17745900  | -0.53238200 |
| C | -2.46372900 | 3.86233500  | -0.40635500 |
| C | -3.41411000 | 2.90291500  | -0.24133300 |
| C | -2.73575900 | 1.62759200  | -0.31413700 |
| N | -1.39366300 | 1.82339500  | -0.48521400 |
| H | -2.58304000 | 4.93631500  | -0.42507800 |
| H | -4.48035200 | 3.02292900  | -0.11134100 |

|    |             |             |             |
|----|-------------|-------------|-------------|
| C  | 3.39967500  | 0.32607400  | -0.29776400 |
| C  | -3.39465500 | 0.39486500  | -0.30769900 |
| C  | -0.02873400 | -2.90566300 | -1.54221200 |
| C  | 0.03798400  | 3.82643200  | -0.60465500 |
| Fe | 0.00312100  | 0.38925100  | -0.58861300 |
| Cl | 0.00872200  | 0.71541900  | -2.92193500 |
| O  | -0.00040400 | 0.27767800  | 1.07805700  |
| H  | -0.01243700 | -0.95920900 | 1.60111800  |
| C  | 3.52699800  | -2.22126300 | 4.51137400  |
| C  | 2.31585500  | -1.81955100 | 5.06856500  |
| C  | 2.44171200  | -2.60824400 | 2.38562400  |
| C  | 3.58863100  | -2.62751300 | 3.17033000  |
| H  | 2.23341900  | -1.51888600 | 6.10786000  |
| H  | 4.53548800  | -2.93403000 | 2.73607700  |
| C  | -0.02550800 | -2.10414600 | 2.12158500  |
| C  | 1.20796200  | -2.19855900 | 2.91761400  |
| C  | 1.16877000  | -1.82254000 | 4.27406600  |
| H  | -0.03635800 | -2.71559700 | 1.21838400  |
| H  | 2.48680600  | -2.90279400 | 1.34343100  |
| C  | -1.25654300 | -2.16457800 | 2.92471700  |
| C  | -2.50435100 | -2.53936200 | 2.39974800  |
| C  | -3.64696100 | -2.52552300 | 3.19084100  |
| C  | -3.56635600 | -2.12007800 | 4.53114100  |
| C  | -2.34123700 | -1.75266500 | 5.08137000  |
| C  | -1.19905300 | -1.78909100 | 4.28069500  |
| H  | -2.56338100 | -2.83293100 | 1.35788800  |
| H  | -4.60462000 | -2.80486600 | 2.76196900  |
| H  | -4.45961300 | -2.09712300 | 5.14884200  |
| H  | -2.24464800 | -1.45370800 | 6.11993900  |
| C  | -0.04193700 | -4.27085400 | -2.15742700 |
| C  | -0.03739300 | -4.36393200 | -3.56484800 |
| C  | -0.05314900 | -5.43386800 | -1.36404400 |
| C  | -0.04543300 | -5.63157900 | -4.15450600 |
| C  | -0.06103600 | -6.68206000 | -1.99643200 |
| C  | -0.06036200 | -6.80194400 | -3.38911900 |
| H  | -0.03861100 | -5.70582000 | -5.24025500 |
| H  | -0.06670400 | -7.58219300 | -1.38475200 |
| C  | 4.85841300  | 0.27912400  | 0.03053200  |
| C  | 5.25024400  | 0.37741900  | 1.38186400  |
| C  | 5.82641900  | 0.16026100  | -0.98859800 |
| C  | 6.61050900  | 0.28063800  | 1.69524700  |
| C  | 7.17499200  | 0.07730800  | -0.62853500 |
| C  | 7.58602900  | 0.11678200  | 0.70809300  |
| H  | 6.91457700  | 0.34546600  | 2.73837300  |

|   |             |             |             |
|---|-------------|-------------|-------------|
| H | 7.92444700  | -0.01119100 | -1.41281300 |
| C | -4.85552300 | 0.37781700  | 0.01431200  |
| C | -5.25167700 | 0.48902900  | 1.36334800  |
| C | -5.82102900 | 0.27197300  | -1.00872700 |
| C | -6.61484700 | 0.41728100  | 1.67102100  |
| C | -7.17240200 | 0.21426300  | -0.65442900 |
| C | -7.58865800 | 0.26621100  | 0.68019700  |
| H | -6.92230300 | 0.49165800  | 2.71251300  |
| H | -7.91978800 | 0.13565500  | -1.44173300 |
| C | 0.05483300  | 5.31847600  | -0.71723700 |
| C | 0.09620000  | 5.90462800  | -1.99745800 |
| C | 0.03702600  | 6.11960400  | 0.44023900  |
| C | 0.11546100  | 7.29946200  | -2.09593000 |
| C | 0.05812300  | 7.51056000  | 0.29605300  |
| C | 0.09359900  | 8.11895400  | -0.96273500 |
| H | 0.14988700  | 7.75653500  | -3.08303900 |
| H | 0.04799700  | 8.13315000  | 1.18869400  |
| C | -0.01981400 | -3.11522400 | -4.41648300 |
| H | -0.88502800 | -2.47521200 | -4.20977500 |
| H | 0.86162200  | -2.49827900 | -4.20796900 |
| H | -0.02193100 | -3.36472000 | -5.48194800 |
| C | -0.05261300 | -5.34609000 | 0.14477300  |
| H | 0.83339300  | -4.81681500 | 0.51516900  |
| H | -0.92835900 | -4.79936100 | 0.51421100  |
| H | -0.06276200 | -6.34113300 | 0.59985000  |
| C | -0.10390400 | -8.15941300 | -4.05170500 |
| H | -1.13772500 | -8.45874700 | -4.27066300 |
| H | 0.44107300  | -8.15952900 | -5.00216000 |
| H | 0.33066500  | -8.93412200 | -3.41073200 |
| C | 4.23790800  | 0.64627300  | 2.47300400  |
| H | 3.95259300  | 1.70626900  | 2.47618800  |
| H | 3.31766300  | 0.07301900  | 2.33611600  |
| H | 4.64528500  | 0.40280100  | 3.45831100  |
| C | 5.42443700  | 0.15954300  | -2.44704300 |
| H | 4.91479500  | -0.76801500 | -2.73161000 |
| H | 4.72622500  | 0.97576000  | -2.66424400 |
| H | 6.29945300  | 0.27466000  | -3.09420500 |
| C | 9.04615700  | -0.02291900 | 1.07127600  |
| H | 9.26536000  | 0.43577300  | 2.04146500  |
| H | 9.33779500  | -1.07994100 | 1.13598000  |
| H | 9.69292400  | 0.44483800  | 0.32054700  |
| C | 0.00175900  | 5.48486000  | 1.81179700  |
| H | -0.89275700 | 4.86336200  | 1.93888700  |
| H | 0.86471500  | 4.82620700  | 1.96685500  |

|   |             |             |             |
|---|-------------|-------------|-------------|
| H | 0.00495800  | 6.24375600  | 2.60027900  |
| C | 0.12751800  | 5.03703600  | -3.23476500 |
| H | 1.01903900  | 4.39913100  | -3.25212500 |
| H | -0.73006900 | 4.35543500  | -3.26924600 |
| H | 0.12250700  | 5.64494300  | -4.14470300 |
| C | 0.07962600  | 9.62426100  | -1.09668700 |
| H | -0.94761300 | 10.00365200 | -1.18220500 |
| H | 0.53395100  | 10.10982900 | -0.22610000 |
| H | 0.62168100  | 9.95272600  | -1.99030400 |
| C | -5.41266700 | 0.25836700  | -2.46533500 |
| H | -4.70321100 | 1.06455700  | -2.68364600 |
| H | -4.91355700 | -0.67702400 | -2.74270700 |
| H | -6.28324400 | 0.38126300  | -3.11703400 |
| C | -4.23987800 | 0.74544800  | 2.45802600  |
| H | -3.32686300 | 0.15980000  | 2.32544300  |
| H | -3.94046600 | 1.80157400  | 2.46088300  |
| H | -4.65418500 | 0.50888200  | 3.44215200  |
| C | -9.05261400 | 0.15315700  | 1.03711000  |
| H | -9.68750100 | 0.63216800  | 0.28332800  |
| H | -9.36361900 | -0.89838600 | 1.10093100  |
| H | -9.26777700 | 0.61622100  | 2.00611600  |
| O | -0.00857000 | -1.46233200 | 4.88435500  |
| H | 4.42391900  | -2.22440800 | 5.12415100  |

**cat2/a13**

|   |             |             |             |
|---|-------------|-------------|-------------|
| C | -0.00284400 | -2.90656700 | -0.92187400 |
| C | -0.67830200 | -4.16132600 | -0.69004800 |
| C | -1.87620300 | -3.86038200 | -0.11404000 |
| C | -1.95650500 | -2.41847400 | -0.04835100 |
| N | -0.78960500 | -1.86473000 | -0.51429500 |
| H | -0.26813500 | -5.13290400 | -0.92692000 |
| H | -2.65775900 | -4.53450200 | 0.20660500  |
| C | -2.91535400 | 1.75379000  | -0.44908900 |
| C | -4.32217100 | 1.65005800  | -0.13130600 |
| C | -4.54209800 | 0.36167700  | 0.24909800  |
| C | -3.27696100 | -0.33033100 | 0.12024100  |
| N | -2.30829300 | 0.53652600  | -0.29478600 |
| H | -5.02554500 | 2.46913000  | -0.18126200 |
| H | -5.46708600 | -0.09957600 | 0.56441100  |
| C | 2.56299900  | 0.50454100  | -1.04655300 |
| C | 3.78122900  | -0.19076000 | -1.39885900 |
| C | 3.43346100  | -1.47947100 | -1.67646900 |
| C | 2.01740400  | -1.59020000 | -1.41910200 |
| N | 1.51215000  | -0.36875600 | -1.04619800 |

|    |             |             |             |
|----|-------------|-------------|-------------|
| H  | 4.75967100  | 0.26541200  | -1.44349500 |
| H  | 4.06649800  | -2.29700100 | -1.99159400 |
| C  | 1.26242600  | 2.59696500  | -0.81978100 |
| C  | 1.15831000  | 4.03860200  | -0.89104600 |
| C  | -0.16943200 | 4.32996300  | -0.96694500 |
| C  | -0.87462200 | 3.06921200  | -0.88566800 |
| N  | 0.01464600  | 2.03746300  | -0.81652900 |
| H  | 2.00095900  | 4.71525400  | -0.90932300 |
| H  | -0.64608100 | 5.29676800  | -1.04542800 |
| C  | 1.30207600  | -2.79112500 | -1.42813500 |
| C  | -2.26863600 | 2.94862700  | -0.78310700 |
| C  | -3.11595400 | -1.71432900 | 0.30055200  |
| C  | 2.47242400  | 1.89491400  | -0.84587900 |
| Fe | -0.38209600 | 0.08393000  | -0.62578500 |
| Cl | -0.88930000 | 0.02640400  | -2.93909200 |
| O  | -0.08005900 | 0.25228500  | 1.06820400  |
| C  | 2.10548300  | 0.70945800  | 6.60908500  |
| C  | 3.31942700  | 0.78247400  | 5.96241900  |
| C  | 3.47291700  | 0.23531800  | 4.66162500  |
| C  | 2.34833100  | -0.38869600 | 4.03114200  |
| C  | 1.09700400  | -0.44955500 | 4.71457200  |
| C  | 0.99915700  | 0.09125900  | 5.98396200  |
| C  | 4.71147800  | 0.29519800  | 3.96607300  |
| C  | 2.50244100  | -0.94536900 | 2.71494900  |
| C  | 3.73453100  | -0.85184900 | 2.07395100  |
| C  | 4.83626200  | -0.23592800 | 2.69861800  |
| C  | 1.35196700  | -1.57838600 | 2.06948500  |
| C  | 0.30892100  | -2.14602000 | 3.01425000  |
| C  | -0.10343300 | -1.07076200 | 4.02896900  |
| H  | -0.64657100 | -0.28762200 | 3.48213100  |
| H  | -0.55817300 | -2.48972400 | 2.44265100  |
| H  | 1.99244800  | 1.12524200  | 7.60692200  |
| H  | 4.17443100  | 1.25660000  | 6.43858400  |
| H  | 0.04876100  | 0.04137800  | 6.51079900  |
| H  | 5.78461500  | -0.17533300 | 2.17176200  |
| H  | 3.84151400  | -1.25639400 | 1.07269500  |
| H  | 0.71229800  | -0.62563800 | 1.49311600  |
| H  | 1.60626900  | -2.21835100 | 1.22674700  |
| C  | -4.30521600 | -2.49164400 | 0.77493600  |
| C  | -5.18887700 | -3.05641000 | -0.16753100 |
| C  | -4.55119200 | -2.62136700 | 2.15505100  |
| C  | -6.30542400 | -3.75884900 | 0.29593000  |
| C  | -5.68093700 | -3.33180600 | 2.57373900  |
| C  | -6.56681100 | -3.91209800 | 1.66137500  |



|   |             |             |             |
|---|-------------|-------------|-------------|
| H | -6.99257300 | -4.19043400 | -0.42919500 |
| H | -5.87467800 | -3.43019900 | 3.64013700  |
| C | -3.09946700 | 4.17537100  | -0.98443300 |
| C | -3.56039400 | 4.47402200  | -2.28127000 |
| C | -3.41475100 | 5.00989400  | 0.10470900  |
| C | -4.33760100 | 5.62186400  | -2.46603800 |
| C | -4.19474200 | 6.14720400  | -0.12622000 |
| C | -4.66210500 | 6.47188200  | -1.40406200 |
| H | -4.69909300 | 5.85594400  | -3.46540900 |
| H | -4.44324600 | 6.79464300  | 0.71257200  |
| C | 3.73932100  | 2.67214300  | -0.68458900 |
| C | 4.51641000  | 3.03398700  | -1.80292200 |
| C | 4.13205100  | 3.04502200  | 0.61827500  |
| C | 5.71453800  | 3.72394000  | -1.59149300 |
| C | 5.34225700  | 3.72642000  | 0.78053300  |
| C | 6.15256600  | 4.06450900  | -0.30774100 |
| H | 6.31649800  | 4.00803500  | -2.45241400 |
| H | 5.65458500  | 4.00662100  | 1.78475900  |
| C | 1.95702600  | -4.01109300 | -1.99481200 |
| C | 1.79313500  | -4.27061100 | -3.37119200 |
| C | 2.70659100  | -4.88349100 | -1.18315000 |
| C | 2.39414100  | -5.41075800 | -3.91320600 |
| C | 3.28943200  | -6.01241800 | -1.76867800 |
| C | 3.14761000  | -6.29170500 | -3.13116800 |
| H | 2.26706400  | -5.61658000 | -4.97421700 |
| H | 3.86675700  | -6.69056100 | -1.14324000 |
| C | 2.87684500  | -4.61653000 | 0.29487200  |
| H | 3.37647200  | -3.65741600 | 0.47508000  |
| H | 1.90803600  | -4.57070100 | 0.80633300  |
| H | 3.47347600  | -5.39965500 | 0.77233000  |
| C | 0.97645400  | -3.33940800 | -4.23756200 |
| H | -0.05715700 | -3.26116800 | -3.88152700 |
| H | 1.37197200  | -2.31769200 | -4.21935000 |
| H | 0.95739200  | -3.68332400 | -5.27616600 |
| C | 3.81285100  | -7.49980500 | -3.74887000 |
| H | 4.81298400  | -7.24946300 | -4.12752300 |
| H | 3.93397300  | -8.30865600 | -3.02012100 |
| H | 3.23385100  | -7.88752900 | -4.59411300 |
| C | -3.60877600 | -2.01644500 | 3.17047700  |
| H | -2.65346200 | -2.55377600 | 3.19002600  |
| H | -3.37548800 | -0.97191400 | 2.93694000  |
| H | -4.03489300 | -2.05607000 | 4.17777100  |
| C | -4.94263700 | -2.89283100 | -1.65012700 |
| H | -4.84668900 | -1.83571700 | -1.92398800 |

|   |             |             |             |
|---|-------------|-------------|-------------|
| H | -4.00850800 | -3.37850400 | -1.95572800 |
| H | -5.75907300 | -3.32585800 | -2.23578300 |
| C | -7.76357200 | -4.70262900 | 2.13681900  |
| H | -7.51539800 | -5.76702100 | 2.24526000  |
| H | -8.11655900 | -4.35018800 | 3.11210800  |
| H | -8.59684400 | -4.63441600 | 1.42891600  |
| C | -2.92095500 | 4.67730400  | 1.49419000  |
| H | -3.29350200 | 3.70023500  | 1.82481100  |
| H | -1.82616400 | 4.62142700  | 1.52374300  |
| H | -3.24406100 | 5.42936800  | 2.22035300  |
| C | -3.22411600 | 3.56553200  | -3.44158200 |
| H | -2.14045500 | 3.46878100  | -3.57536000 |
| H | -3.59677300 | 2.54810200  | -3.27534500 |
| H | -3.65368200 | 3.94108800  | -4.37529800 |
| C | -5.47258400 | 7.72635300  | -1.63492100 |
| H | -4.81968300 | 8.58562500  | -1.83924100 |
| H | -6.14514600 | 7.61817900  | -2.49270300 |
| H | -6.07824900 | 7.98052600  | -0.75805100 |
| C | 3.24582100  | 2.76607300  | 1.81120800  |
| H | 2.39402100  | 3.45819400  | 1.82612100  |
| H | 2.82752800  | 1.75648200  | 1.79109200  |
| H | 3.79554600  | 2.88307100  | 2.74865700  |
| C | 4.04970500  | 2.71893400  | -3.20690600 |
| H | 4.02908500  | 1.64030300  | -3.39906100 |
| H | 3.02942100  | 3.08374600  | -3.37362000 |
| H | 4.70392700  | 3.18230700  | -3.95165600 |
| C | 7.47357600  | 4.76806900  | -0.09968500 |
| H | 8.28034300  | 4.04612100  | 0.08587500  |
| H | 7.75912200  | 5.35607600  | -0.97862000 |
| H | 7.43792800  | 5.44224100  | 0.76325700  |
| H | 0.72695800  | -3.02016700 | 3.53825200  |
| H | -0.79252700 | -1.48035700 | 4.77713400  |
| H | 5.55957300  | 0.77484700  | 4.44916900  |

**cat2/a14**

|   |             |             |             |
|---|-------------|-------------|-------------|
| C | 1.63997700  | -2.28147800 | -1.17125000 |
| C | 1.69854500  | -3.72266300 | -1.19105600 |
| C | 0.43563200  | -4.16711100 | -0.94231100 |
| C | -0.39685100 | -2.99614600 | -0.79922100 |
| N | 0.36042900  | -1.85972000 | -0.93818300 |
| H | 2.59855000  | -4.29818800 | -1.35219500 |
| H | 0.08026600  | -5.18519800 | -0.87042800 |
| C | -3.35265000 | 0.12634100  | -0.76746700 |
| C | -4.51692700 | -0.71895500 | -0.61515200 |

|    |             |             |             |
|----|-------------|-------------|-------------|
| C  | -4.05796900 | -1.99269100 | -0.49542400 |
| C  | -2.61557800 | -1.92270400 | -0.59620600 |
| N  | -2.21141800 | -0.62800000 | -0.75886700 |
| H  | -5.53696900 | -0.36273000 | -0.59743200 |
| H  | -4.62161200 | -2.90522900 | -0.36507200 |
| C  | 2.00778000  | 1.99749100  | -0.94343200 |
| C  | 3.44107600  | 2.06795300  | -1.11417300 |
| C  | 3.87721400  | 0.79320600  | -1.30455500 |
| C  | 2.71642500  | -0.06001100 | -1.20895000 |
| N  | 1.59066600  | 0.69432200  | -0.97710700 |
| H  | 4.01630800  | 2.98224300  | -1.10774700 |
| H  | 4.88328100  | 0.44357300  | -1.48628100 |
| C  | -0.21873000 | 3.07382200  | -0.85919000 |
| C  | -1.06828200 | 4.24325700  | -0.90131100 |
| C  | -2.35024000 | 3.79127800  | -0.94234700 |
| C  | -2.28120100 | 2.34772900  | -0.91063900 |
| N  | -0.97889400 | 1.93516900  | -0.87253200 |
| H  | -0.71063700 | 5.26286700  | -0.91104600 |
| H  | -3.26696800 | 4.36171200  | -0.98571600 |
| C  | 2.75940100  | -1.45154800 | -1.32784000 |
| C  | -3.41026000 | 1.51857400  | -0.87167500 |
| C  | -1.77940700 | -3.04637100 | -0.58323400 |
| C  | 1.17850900  | 3.12794400  | -0.84735800 |
| Fe | -0.29361900 | 0.03517700  | -0.82245700 |
| Cl | -0.45027700 | 0.03816700  | -3.18575400 |
| O  | -0.38898600 | 0.05096900  | 0.89647700  |
| H  | 0.50286600  | 0.03106700  | 1.75849600  |
| C  | 2.90341800  | 2.95532400  | 4.37922700  |
| C  | 3.92041700  | 3.09203600  | 3.43273400  |
| C  | 3.96044300  | 2.22295100  | 2.33802600  |
| C  | 2.99760800  | 1.22728400  | 2.20151200  |
| C  | 1.96452500  | 1.07766300  | 3.14414300  |
| C  | 1.93142700  | 1.96312800  | 4.23511400  |
| H  | 2.86414700  | 3.62203700  | 5.23698700  |
| H  | 4.67013200  | 3.87105300  | 3.54156000  |
| H  | 4.73308600  | 2.32432300  | 1.58155300  |
| H  | 3.03115300  | 0.55356600  | 1.35395500  |
| H  | 1.15033600  | 1.86129200  | 4.98146000  |
| C  | 1.00320000  | -0.06383800 | 2.99251800  |
| C  | -0.30677300 | 0.04589000  | 3.71208600  |
| C  | -1.08778000 | 1.20775800  | 3.53966800  |
| C  | -0.83261400 | -0.99510700 | 4.49488400  |
| C  | -2.33698400 | 1.32697000  | 4.13934700  |
| C  | -2.09004100 | -0.87786100 | 5.08964300  |

|   |             |             |             |
|---|-------------|-------------|-------------|
| H | -0.25240000 | -1.89989400 | 4.64057000  |
| C | -2.84812000 | 0.28118300  | 4.91562800  |
| H | -2.92066200 | 2.23122200  | 3.99084700  |
| H | -2.47472600 | -1.69530200 | 5.69426400  |
| H | -3.82782400 | 0.37054100  | 5.37761100  |
| C | -2.41673300 | -4.38538900 | -0.37569300 |
| C | -2.77812200 | -5.16453800 | -1.49376100 |
| C | -2.66485600 | -4.84594700 | 0.93223600  |
| C | -3.37359000 | -6.41088800 | -1.28004400 |
| C | -3.26523000 | -6.09922700 | 1.09740100  |
| C | -3.62590200 | -6.89610800 | 0.00747600  |
| H | -3.65153700 | -7.01537600 | -2.14127100 |
| H | -3.45564500 | -6.46035900 | 2.10624100  |
| C | 4.06767300  | -2.09563300 | -1.66275800 |
| C | 5.01711200  | -2.35013000 | -0.65536500 |
| C | 4.32851800  | -2.44067300 | -3.00530000 |
| C | 6.22479700  | -2.96044800 | -1.01244300 |
| C | 5.55154400  | -3.04125100 | -3.31583100 |
| C | 6.51025300  | -3.31445100 | -2.33377800 |
| H | 6.95982600  | -3.16265400 | -0.23576000 |
| H | 5.76050000  | -3.30253200 | -4.35150000 |
| C | -4.75852500 | 2.16598200  | -0.90265200 |
| C | -5.42281900 | 2.32324200  | -2.13418100 |
| C | -5.34914900 | 2.60457900  | 0.29761000  |
| C | -6.68277400 | 2.92956700  | -2.14142100 |
| C | -6.61169100 | 3.20341300  | 0.24409000  |
| C | -7.29216600 | 3.37852200  | -0.96509400 |
| H | -7.20128000 | 3.05292000  | -3.09029700 |
| H | -7.07421700 | 3.54016100  | 1.16985400  |
| C | 1.82305800  | 4.47685500  | -0.78142100 |
| C | 1.88433800  | 5.15278900  | 0.45412400  |
| C | 2.34053300  | 5.06993300  | -1.95171300 |
| C | 2.51556900  | 6.39974500  | 0.50530700  |
| C | 2.95437200  | 6.32230600  | -1.85312900 |
| C | 3.06541600  | 6.99664900  | -0.63281300 |
| H | 2.57225600  | 6.91941900  | 1.45987100  |
| H | 3.34975000  | 6.78552400  | -2.75505600 |
| C | 1.24756600  | 4.56992900  | 1.69409000  |
| H | 0.15541700  | 4.67283900  | 1.65327900  |
| H | 1.46404100  | 3.50458700  | 1.80160800  |
| H | 1.60231800  | 5.07538600  | 2.59575600  |
| C | 2.21784000  | 4.38324900  | -3.29404500 |
| H | 2.88934300  | 3.51984400  | -3.36944800 |
| H | 1.20378300  | 4.00211900  | -3.45842200 |

|   |             |             |             |
|---|-------------|-------------|-------------|
| H | 2.46236900  | 5.07128200  | -4.10911000 |
| C | 3.77364800  | 8.32857200  | -0.54605300 |
| H | 4.84848000  | 8.19287700  | -0.36498000 |
| H | 3.67104000  | 8.89908700  | -1.47563400 |
| H | 3.38077500  | 8.94021000  | 0.27341000  |
| C | -4.62892500 | 2.42709500  | 1.61444900  |
| H | -4.38518900 | 1.37564600  | 1.80489000  |
| H | -3.67540800 | 2.96883400  | 1.61881700  |
| H | -5.23371400 | 2.79363100  | 2.44990100  |
| C | -4.78440700 | 1.83934700  | -3.41581100 |
| H | -3.79872500 | 2.29377600  | -3.56969000 |
| H | -4.62091000 | 0.75534500  | -3.39389700 |
| H | -5.40972200 | 2.07350200  | -4.28265400 |
| C | -8.63969500 | 4.06132800  | -1.00524700 |
| H | -8.53094600 | 5.13847800  | -1.19029300 |
| H | -9.27039500 | 3.65760900  | -1.80496100 |
| H | -9.17721300 | 3.94629900  | -0.05781300 |
| C | -2.27536600 | -4.02508900 | 2.14162000  |
| H | -1.19185900 | -4.04585700 | 2.30543400  |
| H | -2.55517000 | -2.97202400 | 2.03498500  |
| H | -2.75183400 | -4.41249700 | 3.04760600  |
| C | -2.53207300 | -4.65803200 | -2.89672900 |
| H | -3.00477400 | -3.68167500 | -3.05547900 |
| H | -1.46211700 | -4.51943200 | -3.09123400 |
| H | -2.92660200 | -5.35446000 | -3.64271800 |
| C | -4.30310500 | -8.23156400 | 0.21163600  |
| H | -4.04096900 | -8.67088500 | 1.18008500  |
| H | -5.39619700 | -8.12813500 | 0.18478800  |
| H | -4.02620200 | -8.94571400 | -0.57175000 |
| C | 3.30455400  | -2.17132100 | -4.08487600 |
| H | 2.42435200  | -2.81443900 | -3.96459200 |
| H | 2.93400400  | -1.14087700 | -4.04831600 |
| H | 3.72361900  | -2.35344700 | -5.07918600 |
| C | 4.75264700  | -1.95782800 | 0.77904600  |
| H | 4.86989800  | -0.87636000 | 0.92115800  |
| H | 3.73562000  | -2.20832400 | 1.09212100  |
| H | 5.44546100  | -2.45794900 | 1.46183400  |
| C | 7.80786500  | -4.00047200 | -2.69312400 |
| H | 8.58545500  | -3.80735700 | -1.94643700 |
| H | 7.67529800  | -5.08902600 | -2.75407700 |
| H | 8.18182800  | -3.66598700 | -3.66737000 |
| C | 1.66301100  | -1.41746700 | 3.03045000  |
| C | 1.12587000  | -2.48499600 | 2.29464300  |
| C | 2.78585700  | -1.65941400 | 3.83907500  |

|   |             |             |            |
|---|-------------|-------------|------------|
| C | 1.68721200  | -3.75937200 | 2.37037500 |
| H | 0.27165400  | -2.29213400 | 1.65684200 |
| C | 3.34308400  | -2.93643300 | 3.92186000 |
| H | 3.21467000  | -0.84303100 | 4.41191700 |
| C | 2.79674000  | -3.99155500 | 3.18818300 |
| H | 1.26719200  | -4.56366100 | 1.77434400 |
| H | 4.20719900  | -3.10507400 | 4.55949200 |
| H | 3.23702300  | -4.98353000 | 3.24452300 |
| H | -0.71051300 | 2.00382800  | 2.90573900 |

**cat2/a15**

|    |             |             |             |
|----|-------------|-------------|-------------|
| C  | 1.41550100  | 3.16564600  | -0.43730700 |
| C  | 2.44774900  | 4.07939500  | 0.00444100  |
| C  | 3.59878800  | 3.35982000  | 0.07509800  |
| C  | 3.26024200  | 2.00022100  | -0.29037200 |
| N  | 1.93493700  | 1.90955900  | -0.60269000 |
| H  | 2.29288400  | 5.12954000  | 0.20694300  |
| H  | 4.58783200  | 3.69194000  | 0.35659400  |
| C  | 2.64094000  | -2.23225500 | -0.74643100 |
| C  | 4.00491000  | -2.64511300 | -0.50295700 |
| C  | 4.73312800  | -1.50737700 | -0.34190600 |
| C  | 3.80940800  | -0.40219200 | -0.46372200 |
| N  | 2.54835700  | -0.86827900 | -0.72192500 |
| H  | 4.34073500  | -3.67189800 | -0.47864900 |
| H  | 5.79142000  | -1.40421700 | -0.14909100 |
| C  | -1.87909900 | 0.91912600  | -2.07580800 |
| C  | -2.73605300 | 2.04684300  | -2.34861600 |
| C  | -2.10840200 | 3.14514300  | -1.84092000 |
| C  | -0.85487500 | 2.68950600  | -1.28859400 |
| N  | -0.73413700 | 1.33580600  | -1.44523600 |
| H  | -3.69641300 | 1.98382600  | -2.83979300 |
| H  | -2.44008400 | 4.17356600  | -1.84153500 |
| C  | -1.39315400 | -1.49742400 | -2.04120800 |
| C  | -1.75472800 | -2.87353300 | -2.28436300 |
| C  | -0.71282100 | -3.63405000 | -1.85131100 |
| C  | 0.30211000  | -2.72033500 | -1.38144700 |
| N  | -0.14532000 | -1.42716500 | -1.47128000 |
| H  | -2.68733500 | -3.19351100 | -2.72645100 |
| H  | -0.61081400 | -4.70942800 | -1.86262600 |
| C  | 0.10523200  | 3.54920700  | -0.73182300 |
| C  | 1.59360200  | -3.12178700 | -1.01434100 |
| C  | 4.17040900  | 0.93661800  | -0.27245800 |
| C  | -2.20839900 | -0.40805200 | -2.36953600 |
| Fe | 0.87897200  | 0.22461500  | -0.99832400 |

|    |             |             |             |
|----|-------------|-------------|-------------|
| C1 | 1.51783600  | 0.43359300  | -3.26916200 |
| O  | 0.60745900  | 0.23500500  | 0.68608500  |
| H  | -0.21133400 | -0.40495400 | 1.41268100  |
| C  | -0.87620100 | -0.65172900 | 2.51059400  |
| C  | -1.20498800 | -2.11320000 | 2.46782100  |
| C  | -0.92651800 | -2.98619200 | 3.53248100  |
| C  | -1.83607900 | -2.63678400 | 1.32770100  |
| C  | -1.29654700 | -4.32915300 | 3.46926400  |
| H  | -0.44271600 | -2.60126000 | 4.42381900  |
| C  | -2.19644100 | -3.97928500 | 1.25835300  |
| H  | -2.03340500 | -1.97504700 | 0.49205500  |
| C  | -1.93322000 | -4.83297400 | 2.33374100  |
| H  | -1.08835000 | -4.98271400 | 4.31251700  |
| H  | -2.66986100 | -4.35926100 | 0.35802400  |
| C  | 0.18688000  | -0.21524600 | 3.47554700  |
| C  | 1.45162200  | -0.83415800 | 3.44597800  |
| C  | -0.02070400 | 0.83563900  | 4.38193100  |
| C  | 2.46309900  | -0.42934200 | 4.31045300  |
| H  | 1.63428500  | -1.62109000 | 2.72056100  |
| C  | 0.99847200  | 1.24964600  | 5.24259600  |
| H  | -0.99022500 | 1.32454900  | 4.41343200  |
| C  | 2.24250800  | 0.61830800  | 5.21232000  |
| H  | 3.43153500  | -0.92038000 | 4.27432900  |
| H  | 0.81623300  | 2.06365900  | 5.93956600  |
| C  | -1.97334300 | 0.32868600  | 2.30262300  |
| C  | -3.30610900 | 0.22652200  | 2.54733300  |
| H  | -1.61375800 | 1.26701500  | 1.88548200  |
| C  | -3.92011200 | -0.89009500 | 3.31547200  |
| C  | -5.03726300 | -1.57759800 | 2.81353600  |
| C  | -3.42531800 | -1.24599800 | 4.57867500  |
| C  | -5.62049700 | -2.61458100 | 3.53860000  |
| H  | -5.43977100 | -1.29414100 | 1.84592000  |
| C  | -4.01551500 | -2.27593800 | 5.31092300  |
| H  | -2.56889700 | -0.71127600 | 4.97930000  |
| C  | -5.11109800 | -2.96738800 | 4.79150300  |
| H  | -6.47367700 | -3.14764200 | 3.12707600  |
| H  | -3.61645900 | -2.53953000 | 6.28688300  |
| H  | -5.56831700 | -3.77309600 | 5.35978400  |
| C  | -4.21471100 | 1.31435000  | 2.10293300  |
| C  | -5.34812600 | 1.66872700  | 2.85827600  |
| C  | -3.96010200 | 2.02908000  | 0.91822700  |
| C  | -6.17884000 | 2.71295400  | 2.45433000  |
| H  | -5.56892700 | 1.12641200  | 3.77237600  |
| C  | -4.79104300 | 3.07207000  | 0.51390100  |

|   |             |             |             |
|---|-------------|-------------|-------------|
| H | -3.11630500 | 1.74852200  | 0.29925100  |
| C | -5.90391300 | 3.42210300  | 1.28200500  |
| H | -7.04318100 | 2.97519800  | 3.05913500  |
| H | -4.56987000 | 3.59811900  | -0.40992200 |
| H | -6.55565900 | 4.23222700  | 0.96592800  |
| C | 5.60675000  | 1.25018400  | 0.00495000  |
| C | 6.43849200  | 1.64857100  | -1.05977900 |
| C | 6.11103900  | 1.14968500  | 1.31547200  |
| C | 7.77971700  | 1.93654900  | -0.78952900 |
| C | 7.45790900  | 1.45160400  | 1.54086400  |
| C | 8.30730200  | 1.84766800  | 0.50292900  |
| H | 8.42835900  | 2.23730600  | -1.61003500 |
| H | 7.85239600  | 1.37417000  | 2.55221700  |
| C | -0.28279300 | 4.97459400  | -0.49242400 |
| C | -0.84423800 | 5.33803600  | 0.74659400  |
| C | -0.07455000 | 5.93749700  | -1.50020100 |
| C | -1.19432900 | 6.67672300  | 0.95537000  |
| C | -0.44295600 | 7.26208000  | -1.24884300 |
| C | -1.00701700 | 7.65100400  | -0.02890000 |
| H | -1.62322900 | 6.96341000  | 1.91355000  |
| H | -0.28086500 | 8.00934800  | -2.02328800 |
| C | -3.47710500 | -0.67107300 | -3.11877100 |
| C | -4.65156800 | -1.04836300 | -2.44037300 |
| C | -3.47017200 | -0.52843400 | -4.52226300 |
| C | -5.81359100 | -1.27547400 | -3.18601300 |
| C | -4.65384400 | -0.76928900 | -5.22572200 |
| C | -5.83503000 | -1.14458200 | -4.57724200 |
| H | -6.72540300 | -1.55886600 | -2.66391500 |
| H | -4.65247300 | -0.66019500 | -6.30857400 |
| C | 1.90112100  | -4.58660500 | -0.98711900 |
| C | 1.90280900  | -5.26970700 | 0.24369700  |
| C | 2.21125000  | -5.26060300 | -2.18558100 |
| C | 2.18891200  | -6.63849500 | 0.25192900  |
| C | 2.49691700  | -6.62821700 | -2.12936000 |
| C | 2.48203700  | -7.33664500 | -0.92321000 |
| H | 2.18608500  | -7.16978100 | 1.20172000  |
| H | 2.74185900  | -7.15212400 | -3.05129400 |
| C | 0.53873900  | 5.54245100  | -2.82420400 |
| H | 1.53632600  | 5.10883600  | -2.68714200 |
| H | -0.06409600 | 4.77982400  | -3.33124800 |
| H | 0.62962400  | 6.40498300  | -3.49129400 |
| C | -1.08319700 | 4.30797600  | 1.82768400  |
| H | -1.94447000 | 3.67627800  | 1.57976300  |
| H | -0.22328000 | 3.64220600  | 1.95898800  |



|   |             |             |             |
|---|-------------|-------------|-------------|
| H | -1.29451900 | 4.78812900  | 2.78827300  |
| C | -1.42434200 | 9.08426500  | 0.20650800  |
| H | -2.43410900 | 9.27065600  | -0.18332400 |
| H | -1.43679700 | 9.32905600  | 1.27396400  |
| H | -0.74944000 | 9.78652500  | -0.29541400 |
| C | -4.66798500 | -1.21377900 | -0.93843500 |
| H | -4.07983100 | -2.08337700 | -0.62214200 |
| H | -4.24694400 | -0.34249000 | -0.42707100 |
| H | -5.69000800 | -1.35447300 | -0.57315600 |
| C | -2.21229100 | -0.11060500 | -5.24973200 |
| H | -1.94680100 | 0.92809200  | -5.01924200 |
| H | -1.34823300 | -0.71432200 | -4.95139500 |
| H | -2.33788700 | -0.19645600 | -6.33336800 |
| C | -7.09273000 | -1.42759700 | -5.36559700 |
| H | -7.09890200 | -2.45945200 | -5.74177800 |
| H | -7.99005500 | -1.29875100 | -4.75093800 |
| H | -7.17842200 | -0.76627900 | -6.23502200 |
| C | 1.62492500  | -4.53079800 | 1.53047000  |
| H | 2.45346900  | -3.85447800 | 1.77866600  |
| H | 0.72365000  | -3.91720800 | 1.45512900  |
| H | 1.48945300  | -5.22134000 | 2.36713600  |
| C | 2.24660000  | -4.51916300 | -3.50277800 |
| H | 1.24824000  | -4.17008200 | -3.79186600 |
| H | 2.88030600  | -3.62682100 | -3.44283400 |
| H | 2.62796100  | -5.15849600 | -4.30470000 |
| C | 2.75508500  | -8.82264000 | -0.89624400 |
| H | 3.16677800  | -9.13832200 | 0.06851900  |
| H | 1.83314200  | -9.39654100 | -1.06083500 |
| H | 3.46276100  | -9.11500000 | -1.67985000 |
| C | 5.21388300  | 0.71355100  | 2.45038000  |
| H | 4.30811200  | 1.32693300  | 2.51278000  |
| H | 4.87445800  | -0.31936600 | 2.30907000  |
| H | 5.73277100  | 0.77218900  | 3.41226700  |
| C | 5.88607300  | 1.76244500  | -2.46219200 |
| H | 5.39873800  | 0.83394800  | -2.78109100 |
| H | 5.12013200  | 2.54498400  | -2.52255900 |
| H | 6.67583200  | 2.00202700  | -3.18062900 |
| C | 9.75194200  | 2.19896800  | 0.77387500  |
| H | 9.86843000  | 3.27507800  | 0.96038100  |
| H | 10.13535600 | 1.67260100  | 1.65466100  |
| H | 10.39274600 | 1.94684200  | -0.07825200 |
| H | 3.03621600  | 0.93863100  | 5.88205400  |
| H | -2.21490000 | -5.88118900 | 2.28245100  |

**cat2/b1**

|    |             |             |             |
|----|-------------|-------------|-------------|
| C  | -2.30379800 | 2.30573600  | 0.36149700  |
| C  | -2.36571500 | 3.74833700  | 0.31874500  |
| C  | -1.23290900 | 4.16978100  | -0.31214900 |
| C  | -0.45385200 | 2.98907800  | -0.59693500 |
| N  | -1.12305000 | 1.87071100  | -0.17878000 |
| H  | -3.19215000 | 4.34012800  | 0.68577900  |
| H  | -0.93206000 | 5.17867600  | -0.55620300 |
| C  | 2.37982700  | -0.19211600 | -0.95821000 |
| C  | 3.52349000  | 0.61949100  | -1.30908400 |
| C  | 3.05793100  | 1.88319400  | -1.52625000 |
| C  | 1.64812900  | 1.86179600  | -1.22207000 |
| N  | 1.26056900  | 0.58703300  | -0.89108400 |
| H  | 4.53846000  | 0.25853300  | -1.38264300 |
| H  | 3.61189400  | 2.76443900  | -1.81738600 |
| C  | -2.95274400 | -1.89751800 | -0.21415100 |
| C  | -4.33073700 | -1.93678800 | 0.22214100  |
| C  | -4.62028500 | -0.69913300 | 0.71119000  |
| C  | -3.43463300 | 0.10812400  | 0.52248500  |
| N  | -2.43769500 | -0.64589300 | -0.02859100 |
| H  | -4.96526700 | -2.81033000 | 0.17441300  |
| H  | -5.54729000 | -0.34125400 | 1.13612200  |
| C  | -0.84637700 | -3.01796300 | -0.85179500 |
| C  | -0.05227200 | -4.20921700 | -1.06331200 |
| C  | 1.25183300  | -3.82217700 | -1.00205400 |
| C  | 1.24864800  | -2.38768600 | -0.81523800 |
| N  | -0.03411100 | -1.92774900 | -0.73026800 |
| H  | -0.45707800 | -5.20048700 | -1.20962500 |
| H  | 2.14391900  | -4.42454500 | -1.10143200 |
| C  | -3.36875400 | 1.48771000  | 0.76964100  |
| C  | 2.40484200  | -1.59639500 | -0.80862700 |
| C  | 0.83546000  | 2.99920700  | -1.15362100 |
| C  | -2.23728700 | -3.01447100 | -0.66937900 |
| Fe | -0.57085000 | -0.02920200 | -0.39912500 |
| Cl | -1.17787900 | 0.12292800  | -2.68643800 |
| O  | -0.19149600 | -0.25714700 | 1.27740500  |
| H  | 0.31474600  | 0.67060900  | 1.83244300  |
| C  | 4.49898100  | 0.60949400  | 2.16333200  |
| C  | 4.65056900  | -0.20992700 | 3.28423400  |
| C  | 3.62649200  | -0.35488200 | 4.22657400  |
| C  | 2.42176600  | 0.29936000  | 4.01765200  |
| C  | 2.21318200  | 1.09995900  | 2.87044700  |
| C  | 3.28993600  | 1.25714800  | 1.96978500  |
| H  | 5.30669100  | 0.69110200  | 1.44695200  |

|   |             |             |             |
|---|-------------|-------------|-------------|
| H | 3.77967300  | -1.00027600 | 5.08281300  |
| H | 3.14934800  | 1.85871700  | 1.08100400  |
| C | 0.90185200  | 1.64656400  | 2.54878400  |
| H | 0.88111700  | 2.48069400  | 1.84905700  |
| H | 0.20021000  | 1.75358000  | 3.37714400  |
| C | 1.37222700  | 4.28719800  | -1.69169500 |
| C | 1.97136100  | 5.23958500  | -0.84532200 |
| C | 1.25582400  | 4.52488200  | -3.07715300 |
| C | 2.44695900  | 6.43017500  | -1.40493100 |
| C | 1.74087900  | 5.73132300  | -3.59040900 |
| C | 2.34203400  | 6.69440000  | -2.77366700 |
| H | 2.91046400  | 7.16872300  | -0.75397300 |
| H | 1.64552500  | 5.92294900  | -4.65737400 |
| C | -4.53873000 | 2.14254700  | 1.43245200  |
| C | -5.63335900 | 2.58786000  | 0.66656000  |
| C | -4.51824700 | 2.31363200  | 2.82987800  |
| C | -6.70509200 | 3.19899500  | 1.32522300  |
| C | -5.61212900 | 2.92742300  | 3.44690500  |
| C | -6.71591400 | 3.37364700  | 2.71287300  |
| H | -7.55168900 | 3.54941500  | 0.73817600  |
| H | -5.60081400 | 3.06187400  | 4.52674400  |
| C | -2.98643900 | -4.28610100 | -0.90567400 |
| C | -3.55057400 | -4.51214600 | -2.17686700 |
| C | -3.12700700 | -5.23194700 | 0.12690200  |
| C | -4.25072200 | -5.70237000 | -2.39325400 |
| C | -3.83663700 | -6.40870000 | -0.13488200 |
| C | -4.40219500 | -6.66352700 | -1.38785200 |
| H | -4.68978600 | -5.88244800 | -3.37261800 |
| H | -3.95070800 | -7.14203700 | 0.66084700  |
| C | 3.72733900  | -2.25637600 | -0.60045200 |
| C | 4.66477600  | -2.40576100 | -1.64033100 |
| C | 4.04167600  | -2.66722400 | 0.71688600  |
| C | 5.95092000  | -2.85940300 | -1.32148500 |
| C | 5.33851100  | -3.10544900 | 0.98674400  |
| C | 6.31781800  | -3.17338200 | -0.01023300 |
| H | 6.68426300  | -2.96103600 | -2.11895800 |
| H | 5.60186000  | -3.37535100 | 2.00700000  |
| C | 0.62982100  | 3.49378500  | -3.98860700 |
| H | 1.26341300  | 2.60227900  | -4.06966500 |
| H | -0.33534000 | 3.13840100  | -3.61158100 |
| H | 0.48276900  | 3.89715300  | -4.99508500 |
| C | 2.10857900  | 4.98751600  | 0.63919200  |
| H | 1.13178400  | 4.84245100  | 1.11499900  |
| H | 2.69713400  | 4.08474800  | 0.83944900  |

|   |             |             |             |
|---|-------------|-------------|-------------|
| H | 2.60464600  | 5.82548100  | 1.13785800  |
| C | 2.88939200  | 7.97360300  | -3.36278000 |
| H | 2.93750500  | 8.77282200  | -2.61552900 |
| H | 3.90650400  | 7.82535100  | -3.74952400 |
| H | 2.27391400  | 8.32526200  | -4.19814600 |
| C | 4.29043600  | -2.11783500 | -3.07916800 |
| H | 3.31366400  | -2.54924000 | -3.32587500 |
| H | 4.21816800  | -1.04422200 | -3.28623500 |
| H | 5.03163900  | -2.53957900 | -3.76497100 |
| C | 3.00289700  | -2.65632000 | 1.81619100  |
| H | 2.44612700  | -1.71539600 | 1.86027200  |
| H | 2.26120700  | -3.44818000 | 1.65367000  |
| H | 3.47035200  | -2.82649900 | 2.78909500  |
| C | 7.72711900  | -3.57531600 | 0.35089000  |
| H | 8.39866900  | -3.52433200 | -0.51219400 |
| H | 8.11636800  | -2.91213200 | 1.13289500  |
| H | 7.76226900  | -4.59821100 | 0.74663800  |
| C | -3.40639000 | -3.48245500 | -3.27400100 |
| H | -3.88400700 | -2.53502400 | -2.99744900 |
| H | -2.35474300 | -3.24275300 | -3.46834000 |
| H | -3.85782700 | -3.83332500 | -4.20687800 |
| C | -5.13753700 | -7.95503800 | -1.66132600 |
| H | -5.99598100 | -7.79469300 | -2.32322400 |
| H | -4.48180100 | -8.68572300 | -2.15339900 |
| H | -5.50276000 | -8.41407300 | -0.73655300 |
| C | -2.52918500 | -4.97575300 | 1.49175900  |
| H | -1.43980200 | -4.86324100 | 1.43473200  |
| H | -2.91826400 | -4.04781900 | 1.92808000  |
| H | -2.75075900 | -5.79573900 | 2.18136500  |
| C | -3.32809200 | 1.85149300  | 3.64040800  |
| H | -3.11056100 | 0.79120800  | 3.46566300  |
| H | -2.42265200 | 2.40483700  | 3.36097700  |
| H | -3.49795800 | 1.99586600  | 4.71164100  |
| C | -5.64118700 | 2.41960900  | -0.83557100 |
| H | -4.78080700 | 2.91958100  | -1.29609800 |
| H | -5.57574200 | 1.36272300  | -1.11947100 |
| H | -6.55280700 | 2.83493200  | -1.27534600 |
| C | -7.90187200 | 4.00464300  | 3.40481600  |
| H | -8.41774000 | 4.71489500  | 2.74972200  |
| H | -8.63552300 | 3.24338100  | 3.70211500  |
| H | -7.60022400 | 4.53711800  | 4.31335500  |
| H | 1.61080700  | 0.17092800  | 4.72902900  |
| N | 5.86687300  | -1.00176000 | 3.42029900  |
| O | 5.86848000  | -1.91579100 | 4.25298300  |

|                |             |             |             |
|----------------|-------------|-------------|-------------|
| O              | 6.81551500  | -0.74598000 | 2.67430000  |
| <b>cat2/b2</b> |             |             |             |
| C              | -1.60267800 | 2.24298100  | -0.77193200 |
| C              | -1.77983800 | 3.67408300  | -0.89108200 |
| C              | -0.53790200 | 4.22566600  | -0.83705900 |
| C              | 0.39153900  | 3.13271200  | -0.65452700 |
| N              | -0.27545100 | 1.94175400  | -0.62330600 |
| H              | -2.73288200 | 4.16596200  | -1.02238100 |
| H              | -0.25642100 | 5.26681200  | -0.90364100 |
| C              | 3.44424100  | 0.27978100  | 0.33008600  |
| C              | 4.54009500  | 1.21478700  | 0.46784000  |
| C              | 4.05023400  | 2.43976700  | 0.13582900  |
| C              | 2.65055900  | 2.25441000  | -0.17511100 |
| N              | 2.31005400  | 0.93492200  | -0.05792600 |
| H              | 5.54495500  | 0.94578100  | 0.76028500  |
| H              | 4.56544600  | 3.38928100  | 0.10877300  |
| C              | -1.51655400 | -2.04949100 | -1.11473500 |
| C              | -2.91148900 | -2.23092600 | -1.43540000 |
| C              | -3.50257300 | -1.00953800 | -1.30812800 |
| C              | -2.45664300 | -0.07467900 | -0.95994800 |
| N              | -1.26470700 | -0.73156100 | -0.82048200 |
| H              | -3.36353900 | -3.17596300 | -1.70127600 |
| H              | -4.53966500 | -0.74532600 | -1.45592200 |
| C              | 0.72489800  | -2.92716200 | -0.57915200 |
| C              | 1.63900400  | -4.01605600 | -0.33361700 |
| C              | 2.77381100  | -3.46407200 | 0.18026700  |
| C              | 2.56809900  | -2.03407100 | 0.20021100  |
| N              | 1.30203700  | -1.73400500 | -0.23520100 |
| H              | 1.42040500  | -5.05708300 | -0.52437700 |
| H              | 3.68324100  | -3.95923100 | 0.48910000  |
| C              | -2.64584900 | 1.31815200  | -0.89095500 |
| C              | 3.57506300  | -1.10600000 | 0.50193900  |
| C              | 1.77383700  | 3.29899400  | -0.49059400 |
| C              | -0.58274500 | -3.08975200 | -1.06001700 |
| Fe             | 0.50717200  | 0.10246500  | -0.38029400 |
| Cl             | 1.02732800  | 0.11002900  | -2.69023800 |
| O              | 0.18278500  | 0.22905600  | 1.31354200  |
| C              | 4.90946800  | -1.62631900 | 0.93867600  |
| C              | 5.23045300  | -1.65907300 | 2.30929300  |
| C              | 5.84161600  | -2.05229300 | -0.02891800 |
| C              | 6.48516400  | -2.14125000 | 2.69449900  |
| C              | 7.08530100  | -2.52455500 | 0.40196400  |
| C              | 7.42417300  | -2.58322500 | 1.75744900  |

|   |             |             |             |
|---|-------------|-------------|-------------|
| H | 6.73580400  | -2.16794800 | 3.75309000  |
| H | 7.80980100  | -2.84945900 | -0.34212100 |
| C | -0.99162200 | -4.43828100 | -1.56360500 |
| C | -1.53647500 | -5.40797700 | -0.70177600 |
| C | -0.81714700 | -4.71005600 | -2.93677200 |
| C | -1.90189300 | -6.64968900 | -1.23315900 |
| C | -1.19599700 | -5.96447200 | -3.42296000 |
| C | -1.73725600 | -6.94822600 | -2.58863900 |
| H | -2.32669300 | -7.40057200 | -0.57008300 |
| H | -1.06577200 | -6.17757600 | -4.48212100 |
| C | -4.03880000 | 1.84350800  | -1.04974000 |
| C | -4.76850600 | 2.24484800  | 0.08496100  |
| C | -4.60631200 | 1.93406800  | -2.33974200 |
| C | -6.08768600 | 2.68273800  | -0.08540400 |
| C | -5.91985400 | 2.39258100  | -2.46204200 |
| C | -6.68310800 | 2.75668200  | -1.34606600 |
| H | -6.65932300 | 2.97181500  | 0.79397700  |
| H | -6.35914600 | 2.46886100  | -3.45488800 |
| C | 2.34002400  | 4.67594700  | -0.63159200 |
| C | 2.42384400  | 5.52413700  | 0.48847300  |
| C | 2.79052600  | 5.10048300  | -1.89676700 |
| C | 2.96651200  | 6.80207800  | 0.32137200  |
| C | 3.32634700  | 6.38626000  | -2.01722700 |
| C | 3.42031900  | 7.25200600  | -0.92265800 |
| H | 3.03758100  | 7.46085500  | 1.18463900  |
| H | 3.67975100  | 6.71902600  | -2.99118600 |
| C | -1.73241900 | -5.11968400 | 0.76901200  |
| H | -0.78578900 | -4.85295900 | 1.25350600  |
| H | -2.41837800 | -4.27838700 | 0.92512600  |
| H | -2.14485700 | -5.98816500 | 1.29107000  |
| C | -0.23973300 | -3.66258700 | -3.86112000 |
| H | -0.86974200 | -2.76622700 | -3.89577000 |
| H | 0.74468200  | -3.32080500 | -3.52181500 |
| H | -0.13802600 | -4.04922300 | -4.87955800 |
| C | -2.10787100 | -8.30666300 | -3.13673700 |
| H | -2.50813800 | -8.23244100 | -4.15394300 |
| H | -1.23099900 | -8.96637400 | -3.18118900 |
| H | -2.85825400 | -8.80199600 | -2.51150500 |
| C | -3.80834400 | 1.55981100  | -3.56920200 |
| H | -2.82013400 | 2.03372600  | -3.56586800 |
| H | -3.63400000 | 0.47867400  | -3.62387700 |
| H | -4.33037100 | 1.86289400  | -4.48181400 |
| C | -4.15011800 | 2.25780700  | 1.46436100  |
| H | -3.40278500 | 1.47159100  | 1.59282900  |

|   |             |             |             |
|---|-------------|-------------|-------------|
| H | -3.64294300 | 3.21432000  | 1.64863700  |
| H | -4.91779200 | 2.12780700  | 2.23267600  |
| C | -8.11834800 | 3.20041900  | -1.50650200 |
| H | -8.78926000 | 2.33596500  | -1.59889100 |
| H | -8.45697500 | 3.78618600  | -0.64572700 |
| H | -8.25080300 | 3.81004200  | -2.40754900 |
| C | 2.69627200  | 4.18047800  | -3.09242100 |
| H | 3.25799200  | 3.25297800  | -2.93126200 |
| H | 1.66022100  | 3.87714300  | -3.28352300 |
| H | 3.08363600  | 4.66358300  | -3.99447900 |
| C | 1.93970000  | 5.05769200  | 1.84240500  |
| H | 0.87375500  | 4.80087800  | 1.81630000  |
| H | 2.47168400  | 4.15488000  | 2.16569400  |
| H | 2.08515700  | 5.83039800  | 2.60323500  |
| C | 3.97191700  | 8.64925900  | -1.08732700 |
| H | 4.73407000  | 8.68978700  | -1.87316400 |
| H | 3.17896600  | 9.35580200  | -1.36707100 |
| H | 4.42149700  | 9.01614200  | -0.15829900 |
| C | 5.51156000  | -1.98768400 | -1.50297800 |
| H | 4.69418400  | -2.67154900 | -1.76045200 |
| H | 5.18024500  | -0.98454500 | -1.79520200 |
| H | 6.38024700  | -2.25280500 | -2.11299700 |
| C | 4.24332300  | -1.16870900 | 3.34367300  |
| H | 4.01384300  | -0.10579300 | 3.20070300  |
| H | 3.29052000  | -1.70436700 | 3.27373700  |
| H | 4.63440900  | -1.29947100 | 4.35715200  |
| C | 8.76189800  | -3.12998500 | 2.19870500  |
| H | 8.70976300  | -4.21466900 | 2.36289100  |
| H | 9.53635400  | -2.95251500 | 1.44465600  |
| H | 9.09174700  | -2.67457300 | 3.13872300  |
| C | -4.37384700 | -0.25944500 | 4.02162600  |
| C | -3.22528000 | -0.24000900 | 4.81617300  |
| C | -3.19434400 | -1.38196000 | 2.26513800  |
| C | -4.37255000 | -0.83660000 | 2.74877900  |
| H | -5.27876300 | -0.82754700 | 2.15571700  |
| C | -2.00223200 | -1.35299900 | 3.02416000  |
| C | -2.04876200 | -0.77871800 | 4.31267800  |
| C | 0.39937500  | -2.28478200 | 3.29426800  |
| C | -0.75671700 | -1.83982900 | 2.42185100  |
| H | 1.21330100  | -2.65594500 | 2.66510800  |
| H | -0.29790800 | -0.78041800 | 1.80702300  |
| H | -0.93150500 | -2.49363700 | 1.56971900  |
| H | 0.09978000  | -3.09202800 | 3.97780100  |
| H | -3.26758900 | 0.21055600  | 5.80037100  |

|   |             |             |            |
|---|-------------|-------------|------------|
| H | 0.79519000  | -1.46203900 | 3.89976300 |
| H | -1.14969500 | -0.74277700 | 4.91883800 |
| H | -3.17969200 | -1.81762900 | 1.27166700 |
| N | -5.59273900 | 0.37581200  | 4.51554800 |
| O | -5.63375400 | 0.70993600  | 5.70123800 |
| O | -6.51301700 | 0.55667900  | 3.71021200 |

**cat2/b3**

|    |             |             |             |
|----|-------------|-------------|-------------|
| C  | -0.56558700 | -2.93668100 | -0.55378000 |
| C  | -1.37581300 | -4.09160400 | -0.25665900 |
| C  | -2.50110600 | -3.63091300 | 0.36046200  |
| C  | -2.39767000 | -2.18992600 | 0.38988900  |
| N  | -1.19507300 | -1.79522000 | -0.13815700 |
| H  | -1.09841400 | -5.11117400 | -0.48443500 |
| H  | -3.34604800 | -4.19500400 | 0.72885700  |
| C  | -2.89966800 | 2.03505900  | -0.19969800 |
| C  | -4.27896200 | 2.12180200  | 0.22587000  |
| C  | -4.61899000 | 0.89168600  | 0.69969500  |
| C  | -3.45873500 | 0.04479300  | 0.52362800  |
| N  | -2.42762400 | 0.76677500  | -0.00862000 |
| H  | -4.88215700 | 3.01709900  | 0.17536600  |
| H  | -5.56443800 | 0.56391700  | 1.10786000  |
| C  | 2.36402400  | 0.14406000  | -1.00634100 |
| C  | 3.47562600  | -0.71011300 | -1.36159800 |
| C  | 2.96743400  | -1.96171800 | -1.54605300 |
| C  | 1.56570700  | -1.89198300 | -1.21330200 |
| N  | 1.22500000  | -0.59992300 | -0.89026800 |
| H  | 4.49898500  | -0.38313400 | -1.46699600 |
| H  | 3.48695300  | -2.86269300 | -1.83969000 |
| C  | 1.30385200  | 2.37737100  | -0.90736500 |
| C  | 1.34820200  | 3.80703000  | -1.12406900 |
| C  | 0.05663200  | 4.23646900  | -1.15177900 |
| C  | -0.76959800 | 3.07598600  | -0.89483800 |
| N  | 0.00946200  | 1.96149000  | -0.77887000 |
| H  | 2.25648400  | 4.37664800  | -1.26243900 |
| H  | -0.31979000 | 5.23784100  | -1.30480300 |
| C  | 0.71156800  | -2.99765100 | -1.13549200 |
| C  | -2.15399100 | 3.12207100  | -0.67669900 |
| C  | -3.45125100 | -1.33909300 | 0.75715600  |
| C  | 2.43448900  | 1.55097200  | -0.90201000 |
| Fe | -0.57775200 | 0.08583600  | -0.38526200 |
| Cl | -1.21693000 | -0.08156700 | -2.66739100 |
| O  | -0.18007600 | 0.39781400  | 1.27771100  |
| H  | 0.39794800  | -0.40510500 | 1.99187000  |



|   |             |             |             |
|---|-------------|-------------|-------------|
| C | 4.20637500  | 0.48040400  | 3.98553200  |
| C | 4.98044800  | 0.11228900  | 2.88474300  |
| C | 4.46297700  | -0.70712400 | 1.87997700  |
| C | 3.14476000  | -1.12423500 | 1.96807000  |
| C | 2.30861300  | -0.73601700 | 3.03748400  |
| C | 2.88338200  | 0.05799700  | 4.05391900  |
| H | 4.63782100  | 1.10986500  | 4.75436900  |
| H | 5.07890400  | -0.96996600 | 1.03018000  |
| H | 2.73566100  | -1.71576500 | 1.16046200  |
| C | 0.86649500  | -1.09361500 | 3.02112600  |
| C | -4.69819400 | -1.96272700 | 1.30449900  |
| C | -4.83681200 | -2.14617900 | 2.69233700  |
| C | -5.72482300 | -2.35548900 | 0.42170600  |
| C | -6.01290000 | -2.72288800 | 3.18248900  |
| C | -6.88303300 | -2.92904700 | 0.95463600  |
| C | -7.04610700 | -3.12315600 | 2.33043300  |
| H | -6.12384100 | -2.86043700 | 4.25622700  |
| H | -7.67920600 | -3.23056500 | 0.27681000  |
| C | 1.16265600  | -4.29218600 | -1.73914900 |
| C | 0.76385500  | -4.56356800 | -3.06639700 |
| C | 1.95954300  | -5.21029300 | -1.02964700 |
| C | 1.19103500  | -5.75296800 | -3.66362900 |
| C | 2.36161100  | -6.38836600 | -1.66874700 |
| C | 1.99406200  | -6.67551400 | -2.98585100 |
| H | 0.88706700  | -5.96305000 | -4.68720100 |
| H | 2.97680200  | -7.09905800 | -1.12055600 |
| C | 3.78168200  | 2.17168000  | -0.73538300 |
| C | 4.71823100  | 2.23837000  | -1.78463100 |
| C | 4.12576200  | 2.61726400  | 0.56313500  |
| C | 6.03008400  | 2.62872900  | -1.48736600 |
| C | 5.44455700  | 2.99777900  | 0.80980100  |
| C | 6.42371100  | 2.96299900  | -0.18905900 |
| H | 6.76349600  | 2.65872800  | -2.29066200 |
| H | 5.72909800  | 3.28725300  | 1.81867900  |
| C | -2.86374800 | 4.41657000  | -0.91290600 |
| C | -3.43966800 | 4.65212500  | -2.17652500 |
| C | -2.94624900 | 5.37947900  | 0.11046700  |
| C | -4.09269000 | 5.86899200  | -2.39555300 |
| C | -3.60969300 | 6.58193300  | -0.15302800 |
| C | -4.19008500 | 6.84457200  | -1.39811600 |
| H | -4.53473700 | 6.05934700  | -3.37157100 |
| H | -3.67330400 | 7.33130100  | 0.63351900  |
| C | -5.57617800 | -2.16021400 | -1.06983700 |
| H | -5.44223600 | -1.10209900 | -1.32333200 |

|   |             |             |             |
|---|-------------|-------------|-------------|
| H | -4.69396900 | -2.68578000 | -1.45366200 |
| H | -6.45485200 | -2.53098800 | -1.60590800 |
| C | -3.73151600 | -1.73012600 | 3.63464700  |
| H | -2.82475300 | -2.32311600 | 3.46353700  |
| H | -3.45444100 | -0.67988100 | 3.48625700  |
| H | -4.02764700 | -1.86188900 | 4.67971700  |
| C | -8.29595000 | -3.77401000 | 2.87595000  |
| H | -8.48291700 | -3.47846700 | 3.91383000  |
| H | -9.17790700 | -3.50856500 | 2.28267600  |
| H | -8.21055800 | -4.86879300 | 2.85803600  |
| C | -3.35340700 | 3.60737700  | -3.26546100 |
| H | -2.31562200 | 3.32242200  | -3.47279100 |
| H | -3.86577800 | 2.68355800  | -2.97149900 |
| H | -3.80446200 | 3.96737000  | -4.19504500 |
| C | -2.32728400 | 5.11666200  | 1.46456800  |
| H | -2.73305200 | 4.20305900  | 1.91556000  |
| H | -1.24283000 | 4.97281100  | 1.38590600  |
| H | -2.51136200 | 5.94753700  | 2.15223800  |
| C | -4.92972400 | 8.13798700  | -1.65044000 |
| H | -4.86108200 | 8.44096800  | -2.70089400 |
| H | -5.99661900 | 8.03571800  | -1.41046200 |
| H | -4.53482200 | 8.95348400  | -1.03488100 |
| C | 4.32259500  | 1.92128000  | -3.21193900 |
| H | 4.28849800  | 0.84342400  | -3.40769500 |
| H | 3.32618100  | 2.31330900  | -3.44327600 |
| H | 5.03436700  | 2.36236200  | -3.91677100 |
| C | 7.86166100  | 3.25487500  | 0.16199600  |
| H | 8.22964900  | 2.48900400  | 0.85626300  |
| H | 8.50550800  | 3.25653600  | -0.72338400 |
| H | 7.96501700  | 4.22546400  | 0.66224800  |
| C | 3.09753200  | 2.69176300  | 1.66908500  |
| H | 2.38995400  | 3.50974100  | 1.48669400  |
| H | 2.50196400  | 1.77780800  | 1.74845500  |
| H | 3.57943800  | 2.87068200  | 2.63315700  |
| C | 2.35944700  | -4.95685800 | 0.40526700  |
| H | 2.86587000  | -3.99249200 | 0.52219700  |
| H | 1.48239500  | -4.94082000 | 1.06270500  |
| H | 3.03571200  | -5.73571100 | 0.77007300  |
| C | -0.12429800 | -3.60120200 | -3.82108600 |
| H | -1.13120600 | -3.57137800 | -3.38754300 |
| H | 0.24391500  | -2.57094100 | -3.77724400 |
| H | -0.21609300 | -3.89387100 | -4.87142500 |
| C | 2.47053600  | -7.93542600 | -3.67011300 |
| H | 1.70737700  | -8.33769300 | -4.34562900 |

|   |             |             |             |
|---|-------------|-------------|-------------|
| H | 3.36709000  | -7.74078200 | -4.27370600 |
| H | 2.72756300  | -8.71485100 | -2.94493800 |
| C | 0.53768400  | -2.53842700 | 2.67519400  |
| H | -0.53992500 | -2.66428200 | 2.53778100  |
| H | 1.02212400  | -2.86335100 | 1.75483400  |
| H | 0.86330700  | -3.21139500 | 3.48259200  |
| C | 0.00813100  | -0.53210100 | 4.14151900  |
| H | 0.25251100  | -0.99740500 | 5.10855400  |
| H | 0.12734600  | 0.55138300  | 4.23761600  |
| H | -1.04622200 | -0.72812300 | 3.93189900  |
| H | 2.28672600  | 0.36304700  | 4.90579000  |
| N | 6.33328200  | 0.64463000  | 2.74358600  |
| O | 7.02459800  | 0.23063400  | 1.80994300  |
| O | 6.70362800  | 1.50349300  | 3.54984000  |

**cat2/b4**

|   |             |             |             |
|---|-------------|-------------|-------------|
| C | -1.55963400 | -1.88788800 | -1.34348400 |
| C | -2.95461900 | -1.94185800 | -1.70587600 |
| C | -3.45636500 | -0.68875300 | -1.51290900 |
| C | -2.34683600 | 0.14997000  | -1.11757400 |
| N | -1.21268600 | -0.60326400 | -1.00397400 |
| H | -3.47664000 | -2.83664400 | -2.01431900 |
| H | -4.47631500 | -0.35291900 | -1.62422100 |
| C | 0.79771200  | 3.06243800  | -0.90542300 |
| C | -0.02179800 | 4.23228600  | -1.13720800 |
| C | -1.31577200 | 3.80854600  | -1.12041900 |
| C | -1.27823400 | 2.37389400  | -0.93905200 |
| N | 0.01372300  | 1.94886400  | -0.81577800 |
| H | 0.35958000  | 5.23524200  | -1.26562100 |
| H | -2.22070600 | 4.38635100  | -1.24615700 |
| C | 2.38159500  | -2.23036300 | 0.30743300  |
| C | 2.48160100  | -3.67086600 | 0.26102400  |
| C | 1.35875400  | -4.12203400 | -0.36589300 |
| C | 0.55041700  | -2.96184900 | -0.65346800 |
| N | 1.18664400  | -1.82596900 | -0.23050100 |
| H | 3.32462000  | -4.24083900 | 0.62475100  |
| H | 1.08516600  | -5.13837200 | -0.61106200 |
| C | 3.44816700  | -0.00189400 | 0.49975400  |
| C | 4.60829000  | 0.83658000  | 0.71286300  |
| C | 4.28596700  | 2.07368600  | 0.24435600  |
| C | 2.91517300  | 1.99981100  | -0.20958300 |
| N | 2.43239100  | 0.73159400  | -0.04423900 |
| H | 5.54224200  | 0.49934800  | 1.13943500  |
| H | 4.89464400  | 2.96632300  | 0.21765200  |

|    |             |             |             |
|----|-------------|-------------|-------------|
| C  | -0.72625100 | -3.00601600 | -1.23687800 |
| C  | 2.18139700  | 3.09818300  | -0.67805000 |
| C  | -2.41280300 | 1.55263500  | -0.97051700 |
| C  | 3.42889600  | -1.38951300 | 0.71106700  |
| Fe | 0.59073300  | 0.05692800  | -0.47618000 |
| Cl | 1.26343500  | -0.07727500 | -2.73951100 |
| O  | 0.15543700  | 0.29039700  | 1.20407000  |
| H  | -0.46068600 | -0.70539400 | 1.70796000  |
| C  | -0.34877300 | -1.38340200 | 3.80130100  |
| C  | -1.18172900 | -0.23955900 | 4.43993100  |
| C  | -0.99975600 | -1.59711000 | 2.43285000  |
| C  | -2.39208800 | -1.15045300 | 2.58068400  |
| C  | -3.48535500 | -1.34960000 | 1.73049300  |
| C  | -4.68252900 | -0.69188500 | 1.99002700  |
| C  | -4.76766800 | 0.14901000  | 3.10329100  |
| C  | -3.70231100 | 0.32608200  | 3.99692300  |
| C  | -2.51248800 | -0.32948400 | 3.72461800  |
| H  | -3.39277000 | -1.97125500 | 0.84964100  |
| H  | -3.81617900 | 0.99661300  | 4.84044300  |
| H  | -5.53508300 | -0.78258600 | 1.32899900  |
| H  | -0.71761700 | 0.73110200  | 4.21985100  |
| H  | 0.71238700  | -1.13613800 | 3.71980800  |
| H  | -0.79596200 | -2.52317600 | 1.89444600  |
| N  | -5.97912600 | 0.94788900  | 3.27940300  |
| O  | -5.93982800 | 1.87862600  | 4.09168200  |
| O  | -6.96203600 | 0.68129600  | 2.58402800  |
| C  | -3.75792200 | 2.17868300  | -0.79995100 |
| C  | -4.67265900 | 2.30373800  | -1.86271100 |
| C  | -4.11640000 | 2.58367800  | 0.50812000  |
| C  | -5.97801300 | 2.72369900  | -1.57634300 |
| C  | -5.43079000 | 2.98677400  | 0.74618700  |
| C  | -6.38615800 | 3.02924100  | -0.27530000 |
| H  | -6.69318500 | 2.80694100  | -2.39233000 |
| H  | -5.72480200 | 3.25454700  | 1.75870100  |
| C  | 2.90012500  | 4.39206900  | -0.88826300 |
| C  | 3.48905900  | 4.64222600  | -2.14341300 |
| C  | 2.98813100  | 5.33515700  | 0.15261100  |
| C  | 4.15899800  | 5.85399600  | -2.33604500 |
| C  | 3.66902200  | 6.53367400  | -0.08478500 |
| C  | 4.25697400  | 6.81302400  | -1.32231500 |
| H  | 4.61701600  | 6.05270900  | -3.30304700 |
| H  | 3.74262400  | 7.26489600  | 0.71772500  |
| C  | 4.65074800  | -2.02640500 | 1.29647600  |
| C  | 5.72486700  | -2.38465700 | 0.45745600  |

|   |             |             |             |
|---|-------------|-------------|-------------|
| C | 4.71381000  | -2.25906000 | 2.68290900  |
| C | 6.85689700  | -2.97014800 | 1.03273700  |
| C | 5.86625500  | -2.84438000 | 3.21620600  |
| C | 6.94741600  | -3.20868800 | 2.40798500  |
| H | 7.68968600  | -3.24624200 | 0.38899100  |
| H | 5.92008200  | -3.01877100 | 4.28902100  |
| C | -1.22489000 | -4.31309400 | -1.76567500 |
| C | -1.09878100 | -4.56307600 | -3.14804700 |
| C | -1.79992200 | -5.27259900 | -0.91041500 |
| C | -1.54974600 | -5.78784700 | -3.64910700 |
| C | -2.24258400 | -6.48139000 | -1.45778900 |
| C | -2.12719300 | -6.75768600 | -2.82332600 |
| H | -1.44628800 | -5.98866600 | -4.71364100 |
| H | -2.68817900 | -7.22476300 | -0.79981500 |
| C | 2.36435400  | 5.05283000  | 1.50057800  |
| H | 1.27940200  | 4.91611300  | 1.41644500  |
| H | 2.76425100  | 4.12992100  | 1.93777400  |
| H | 2.55043800  | 5.87126200  | 2.20246800  |
| C | 3.40544700  | 3.61408300  | -3.24825500 |
| H | 3.90929900  | 2.68252300  | -2.96427100 |
| H | 2.36761500  | 3.33898600  | -3.46816100 |
| H | 3.86622500  | 3.98503000  | -4.16872600 |
| C | 4.95868400  | 8.12826300  | -1.56987500 |
| H | 5.81135700  | 8.00617300  | -2.24699100 |
| H | 4.27929800  | 8.85676500  | -2.03231600 |
| H | 5.32561500  | 8.57046700  | -0.63747200 |
| C | 3.55140900  | -1.88873500 | 3.57491800  |
| H | 3.27005300  | -0.83628300 | 3.45051100  |
| H | 2.66325900  | -2.48262800 | 3.32719900  |
| H | 3.78884100  | -2.05816900 | 4.62954300  |
| C | 5.65293500  | -2.14413000 | -1.03321100 |
| H | 4.78433800  | -2.64599900 | -1.47563100 |
| H | 5.54517400  | -1.07731900 | -1.26148700 |
| H | 6.55258900  | -2.51113400 | -1.53610000 |
| C | 8.17019900  | -3.87086100 | 2.99934700  |
| H | 8.32619700  | -3.56982600 | 4.04088000  |
| H | 8.07120300  | -4.96461300 | 2.98732300  |
| H | 9.07463800  | -3.62096800 | 2.43406600  |
| C | -1.94206300 | -5.01108800 | 0.57214500  |
| H | -0.96438400 | -4.88752700 | 1.05292400  |
| H | -2.50881700 | -4.09342800 | 0.76581200  |
| H | -2.46014600 | -5.83575700 | 1.07065700  |
| C | -0.49910800 | -3.52607900 | -4.07067100 |
| H | -1.16883000 | -2.66479200 | -4.18327300 |

|   |             |             |             |
|---|-------------|-------------|-------------|
| H | 0.44291100  | -3.12213600 | -3.68432700 |
| H | -0.31665500 | -3.94442200 | -5.06520700 |
| C | -2.63891900 | -8.05726600 | -3.39972500 |
| H | -3.65595500 | -7.93857600 | -3.79673800 |
| H | -2.00823400 | -8.40508700 | -4.22534600 |
| H | -2.67417900 | -8.84754300 | -2.64232800 |
| C | -3.10388100 | 2.60594900  | 1.63119000  |
| H | -2.52150100 | 1.68152200  | 1.68894300  |
| H | -2.38225500 | 3.41866700  | 1.48260900  |
| H | -3.59831700 | 2.76513500  | 2.59244900  |
| C | -4.25687300 | 2.02515500  | -3.29208600 |
| H | -3.26813600 | 2.44679600  | -3.50465500 |
| H | -4.19175400 | 0.95280500  | -3.50823900 |
| H | -4.97196000 | 2.46241000  | -3.99581700 |
| C | -7.81278500 | 3.40296900  | 0.04721300  |
| H | -8.46777600 | 3.29443700  | -0.82328000 |
| H | -8.19682700 | 2.76426500  | 0.85170400  |
| H | -7.88486000 | 4.44119800  | 0.39559600  |
| H | -1.26900700 | -0.32175700 | 5.52875100  |
| H | -0.43702500 | -2.29930600 | 4.40294700  |

**cat2/b5**

|   |             |             |             |
|---|-------------|-------------|-------------|
| C | -1.66626500 | -1.86159900 | -1.22804800 |
| C | -3.06690000 | -1.92683800 | -1.56654500 |
| C | -3.55999600 | -0.66389600 | -1.42973900 |
| C | -2.44935700 | 0.17646900  | -1.04882400 |
| N | -1.31272400 | -0.57267900 | -0.91505400 |
| H | -3.58956800 | -2.82973900 | -1.84791200 |
| H | -4.57019200 | -0.31384000 | -1.58405100 |
| C | 0.62053600  | 3.14926500  | -0.60181200 |
| C | -0.22502800 | 4.31409800  | -0.74306300 |
| C | -1.50322500 | 3.85772200  | -0.82739500 |
| C | -1.43119000 | 2.41440900  | -0.77045000 |
| N | -0.13142900 | 2.00947600  | -0.62872200 |
| H | 0.13220800  | 5.33370000  | -0.76147700 |
| H | -2.41805600 | 4.42164900  | -0.93932700 |
| C | 2.43048300  | -2.19080800 | 0.01401800  |
| C | 2.54278900  | -3.62626600 | -0.08957400 |
| C | 1.35298300  | -4.07746100 | -0.57519000 |
| C | 0.50546700  | -2.92122600 | -0.73206900 |
| N | 1.17593800  | -1.78457600 | -0.36017700 |
| H | 3.43174300  | -4.19175600 | 0.15004300  |
| H | 1.05938600  | -5.09060200 | -0.80943600 |
| C | 3.46647300  | 0.04449000  | 0.25880900  |

|    |             |             |             |
|----|-------------|-------------|-------------|
| C  | 4.61339100  | 0.89872300  | 0.47350800  |
| C  | 4.20798600  | 2.16920100  | 0.20546900  |
| C  | 2.80618300  | 2.09169300  | -0.13850600 |
| N  | 2.38077000  | 0.79306400  | -0.10385000 |
| H  | 5.59178800  | 0.55069200  | 0.77204000  |
| H  | 4.78065300  | 3.08468900  | 0.24466900  |
| C  | -0.82047200 | -2.97497700 | -1.18295000 |
| C  | 2.00771100  | 3.20947300  | -0.41169300 |
| C  | -2.53807300 | 1.57475700  | -0.93127400 |
| C  | 3.50514900  | -1.35310700 | 0.34621500  |
| Fe | 0.51522000  | 0.10852400  | -0.43850800 |
| Cl | 1.02960400  | 0.13641400  | -2.74643300 |
| O  | 0.19376800  | 0.21319100  | 1.23186900  |
| H  | -0.16933200 | -0.79737300 | 1.83295500  |
| C  | 0.13000400  | -1.67056100 | 3.81930100  |
| C  | -0.67040500 | -1.09647500 | 4.76151000  |
| C  | -0.60262000 | -1.82071600 | 2.55635100  |
| C  | -1.98374800 | -1.41034700 | 2.86260500  |
| C  | -3.13269500 | -1.37483400 | 2.07551800  |
| C  | -4.29931700 | -0.81671800 | 2.59871200  |
| C  | -4.28972600 | -0.30491800 | 3.90093200  |
| C  | -3.15968100 | -0.35179400 | 4.72599300  |
| C  | -2.00138000 | -0.90970900 | 4.19733100  |
| H  | -3.12617900 | -1.74832500 | 1.05872900  |
| H  | -3.20893200 | 0.05145400  | 5.73034400  |
| H  | -5.20402400 | -0.74637100 | 2.00834500  |
| H  | -0.38308000 | -0.81319500 | 5.76780000  |
| H  | 1.17580900  | -1.92207500 | 3.94308100  |
| H  | -0.39666800 | -2.64487600 | 1.87623700  |
| N  | -5.50069800 | 0.33948500  | 4.41005000  |
| O  | -5.55067800 | 0.61764300  | 5.60980800  |
| O  | -6.40731500 | 0.58550600  | 3.60603300  |
| C  | -3.88806600 | 2.20504900  | -1.07340200 |
| C  | -4.41004500 | 2.44400000  | -2.36268000 |
| C  | -4.62038400 | 2.55343600  | 0.07666300  |
| C  | -5.68095500 | 3.01272900  | -2.47430800 |
| C  | -5.89467400 | 3.11020700  | -0.08500100 |
| C  | -6.44407500 | 3.34251500  | -1.34779900 |
| H  | -6.08603100 | 3.20311300  | -3.46627900 |
| H  | -6.46883900 | 3.36513100  | 0.80335800  |
| C  | 2.67045600  | 4.54845600  | -0.47140700 |
| C  | 3.19627700  | 4.99419000  | -1.69949900 |
| C  | 2.76866400  | 5.34003900  | 0.68853900  |
| C  | 3.81844600  | 6.24553900  | -1.74402700 |

|   |             |             |             |
|---|-------------|-------------|-------------|
| C | 3.40007000  | 6.58431600  | 0.59729200  |
| C | 3.92782700  | 7.05569800  | -0.60915800 |
| H | 4.22870900  | 6.59484800  | -2.68941700 |
| H | 3.48305400  | 7.19901900  | 1.49139200  |
| C | 4.79805900  | -1.99799600 | 0.73691600  |
| C | 5.79977900  | -2.19957000 | -0.23420000 |
| C | 4.99758200  | -2.40103900 | 2.07024200  |
| C | 6.99947600  | -2.80049800 | 0.15826500  |
| C | 6.21523300  | -2.99312500 | 2.41969100  |
| C | 7.22750400  | -3.20319000 | 1.47857100  |
| H | 7.77603600  | -2.95820700 | -0.58758000 |
| H | 6.37506100  | -3.29803000 | 3.45193500  |
| C | -1.35394400 | -4.28525100 | -1.66956900 |
| C | -1.34351600 | -4.53707000 | -3.05715700 |
| C | -1.84913000 | -5.24530800 | -0.76633800 |
| C | -1.83022700 | -5.76434100 | -3.51679600 |
| C | -2.33120400 | -6.45653800 | -1.27320000 |
| C | -2.33139900 | -6.73479400 | -2.64331800 |
| H | -1.81637900 | -5.96685000 | -4.58587700 |
| H | -2.71563600 | -7.20071500 | -0.57864700 |
| C | 2.20804000  | 4.84868400  | 2.00357900  |
| H | 1.12824000  | 4.67012100  | 1.93410700  |
| H | 2.66434600  | 3.89645300  | 2.29969000  |
| H | 2.38225100  | 5.57367200  | 2.80421100  |
| C | 3.09218300  | 4.13220100  | -2.93689300 |
| H | 3.60946500  | 3.17476200  | -2.80249400 |
| H | 2.04943800  | 3.88459100  | -3.16745200 |
| H | 3.52511000  | 4.63520000  | -3.80674100 |
| C | 4.57558800  | 8.41849100  | -0.69101500 |
| H | 5.35671000  | 8.44607000  | -1.45847800 |
| H | 3.83835900  | 9.19043800  | -0.94940200 |
| H | 5.02698600  | 8.70687800  | 0.26443800  |
| C | 3.90771000  | -2.21308900 | 3.10037200  |
| H | 3.52038400  | -1.18768200 | 3.09851500  |
| H | 3.05696600  | -2.87264400 | 2.88720200  |
| H | 4.26841900  | -2.44284500 | 4.10752200  |
| C | 5.58035000  | -1.77760900 | -1.66905800 |
| H | 4.64776700  | -2.19154200 | -2.06970400 |
| H | 5.49902300  | -0.68762300 | -1.75661300 |
| H | 6.40451900  | -2.10869900 | -2.30783900 |
| C | 8.52258600  | -3.87707400 | 1.86799600  |
| H | 8.74225200  | -3.74121300 | 2.93226000  |
| H | 8.47635000  | -4.95790200 | 1.67890600  |
| H | 9.36822200  | -3.48370000 | 1.29326900  |



|   |             |             |             |
|---|-------------|-------------|-------------|
| C | -1.85535000 | -4.98539000 | 0.72294600  |
| H | -0.83493300 | -4.92316700 | 1.12043000  |
| H | -2.34917000 | -4.03898300 | 0.96889200  |
| H | -2.37462700 | -5.78385700 | 1.26102100  |
| C | -0.82457400 | -3.50014700 | -4.02760200 |
| H | -1.48833000 | -2.62781400 | -4.06623800 |
| H | 0.15906600  | -3.11767000 | -3.73358300 |
| H | -0.74775200 | -3.91154600 | -5.03851600 |
| C | -2.88522500 | -8.03800300 | -3.17054100 |
| H | -3.94808700 | -7.93844000 | -3.42843800 |
| H | -2.36030000 | -8.35895800 | -4.07684600 |
| H | -2.80400000 | -8.83916100 | -2.42815100 |
| C | -4.05103900 | 2.37808900  | 1.46611100  |
| H | -3.34364200 | 1.54782000  | 1.52515900  |
| H | -3.51263800 | 3.28276000  | 1.77902900  |
| H | -4.84938900 | 2.19261300  | 2.19071800  |
| C | -3.60877700 | 2.10069300  | -3.59851700 |
| H | -2.60298000 | 2.53480500  | -3.55841000 |
| H | -3.47493700 | 1.01724900  | -3.70256600 |
| H | -4.10381900 | 2.46788900  | -4.50247900 |
| C | -7.83586900 | 3.91125500  | -1.49663400 |
| H | -7.92788300 | 4.51478300  | -2.40634900 |
| H | -8.58317400 | 3.10910500  | -1.56062900 |
| H | -8.10663600 | 4.53950000  | -0.64145900 |

**cat2/b6**

|   |             |             |             |
|---|-------------|-------------|-------------|
| C | -1.31477200 | 2.35251600  | -1.03093700 |
| C | -1.37446900 | 3.78683200  | -1.20746700 |
| C | -0.08766600 | 4.23208700  | -1.21163100 |
| C | 0.74919500  | 3.07541900  | -0.97691100 |
| N | -0.01587600 | 1.94876300  | -0.89879900 |
| H | -2.28787500 | 4.34982000  | -1.33870100 |
| H | 0.27831800  | 5.24155300  | -1.33350100 |
| C | 3.43633700  | 0.06078900  | 0.46562100  |
| C | 4.59374800  | 0.91026000  | 0.64749100  |
| C | 4.25325600  | 2.13977600  | 0.17253200  |
| C | 2.87802400  | 2.04907700  | -0.26277500 |
| N | 2.40786100  | 0.77749900  | -0.07498000 |
| H | 5.53727300  | 0.58503500  | 1.06154200  |
| H | 4.85403600  | 3.03695200  | 0.12695400  |
| C | -1.51689500 | -1.91426700 | -1.41909000 |
| C | -2.90747200 | -1.99582500 | -1.79542200 |
| C | -3.43317100 | -0.75005500 | -1.61799100 |
| C | -2.34215600 | 0.11107000  | -1.21887600 |

|    |             |             |             |
|----|-------------|-------------|-------------|
| N  | -1.19659300 | -0.61966000 | -1.09009000 |
| H  | -3.41076800 | -2.90216300 | -2.10119100 |
| H  | -4.45756200 | -0.43320100 | -1.74329600 |
| C  | 0.58951200  | -2.94978400 | -0.65944000 |
| C  | 1.39371400  | -4.09806700 | -0.31540000 |
| C  | 2.49636200  | -3.62425200 | 0.33031600  |
| C  | 2.39294200  | -2.18301300 | 0.32748600  |
| N  | 1.20715400  | -1.80072200 | -0.24954800 |
| H  | 1.12962200  | -5.12243900 | -0.53641600 |
| H  | 3.32940400  | -4.17999000 | 0.73664300  |
| C  | -2.43452500 | 1.51297300  | -1.06864900 |
| C  | 3.43274200  | -1.32356900 | 0.70843800  |
| C  | 2.13111800  | 3.13321900  | -0.74010500 |
| C  | -0.67007000 | -3.01783800 | -1.28069600 |
| Fe | 0.58588200  | 0.07621300  | -0.52676700 |
| Cl | 1.31391800  | -0.08053700 | -2.77659800 |
| O  | 0.09770200  | 0.29769400  | 1.12081000  |
| H  | -1.73267700 | -1.00671500 | 5.63787000  |
| C  | 4.68409700  | -1.92732600 | 1.26937000  |
| C  | 4.88192100  | -1.98803000 | 2.66073800  |
| C  | 5.67437200  | -2.40110000 | 0.38187800  |
| C  | 6.07377300  | -2.53676000 | 3.14824600  |
| C  | 6.84742300  | -2.94274000 | 0.91340200  |
| C  | 7.06505700  | -3.02407500 | 2.29341300  |
| H  | 6.23010900  | -2.58009200 | 4.22434400  |
| H  | 7.61532600  | -3.30293000 | 0.23160400  |
| C  | -1.12981100 | -4.33520800 | -1.81959900 |
| C  | -1.74268100 | -5.29232800 | -0.98844100 |
| C  | -0.93653600 | -4.59105400 | -3.19317400 |
| C  | -2.15043000 | -6.50687800 | -1.54990900 |
| C  | -1.35618100 | -5.82092700 | -3.70887400 |
| C  | -1.96168700 | -6.79223800 | -2.90543100 |
| H  | -2.62965900 | -7.24659900 | -0.91178600 |
| H  | -1.20756200 | -6.02330900 | -4.76772700 |
| C  | -3.78846400 | 2.11687800  | -0.89385700 |
| C  | -4.14842400 | 2.51617100  | 0.41599200  |
| C  | -4.70612700 | 2.23345500  | -1.95512400 |
| C  | -5.46513100 | 2.91103500  | 0.65419400  |
| C  | -6.01498300 | 2.64060400  | -1.66662200 |
| C  | -6.42299800 | 2.94429900  | -0.36519100 |
| H  | -5.76028900 | 3.17789600  | 1.66648400  |
| H  | -6.73256600 | 2.71632400  | -2.48120600 |
| C  | 2.83016700  | 4.43793100  | -0.95024200 |
| C  | 2.91443200  | 5.37560300  | 0.09595100  |

|   |             |             |             |
|---|-------------|-------------|-------------|
| C | 3.40346900  | 4.70421700  | -2.20909600 |
| C | 3.57699500  | 6.58452200  | -0.13968000 |
| C | 4.05618600  | 5.92584500  | -2.39952800 |
| C | 4.15050500  | 6.87947400  | -1.38049000 |
| H | 3.64755600  | 7.31177000  | 0.66672900  |
| H | 4.50325200  | 6.13659800  | -3.36907600 |
| C | -1.97342100 | -5.01665700 | 0.48009000  |
| H | -1.03031200 | -4.83119500 | 1.00721300  |
| H | -2.60014400 | -4.12936200 | 0.62750800  |
| H | -2.47066100 | -5.86080200 | 0.96710000  |
| C | -0.31020500 | -3.55068200 | -4.09412900 |
| H | -0.98778600 | -2.70156700 | -4.24574800 |
| H | 0.60496900  | -3.12682100 | -3.66695400 |
| H | -0.07321800 | -3.97306900 | -5.07537200 |
| C | -2.37697500 | -8.12482800 | -3.48411200 |
| H | -2.72585300 | -8.02173200 | -4.51752300 |
| H | -1.53463800 | -8.82944500 | -3.49518700 |
| H | -3.17997800 | -8.58506700 | -2.89854800 |
| C | -4.28923000 | 1.96248400  | -3.38571900 |
| H | -3.30824600 | 2.40097500  | -3.60047800 |
| H | -4.20663400 | 0.89167000  | -3.60346100 |
| H | -5.01310800 | 2.38827100  | -4.08745500 |
| C | -3.13900000 | 2.53605000  | 1.54236100  |
| H | -2.56024900 | 1.60944200  | 1.60352000  |
| H | -2.41386000 | 3.34624600  | 1.39777500  |
| H | -3.63656200 | 2.69568900  | 2.50191200  |
| C | -7.85236200 | 3.30228000  | -0.03804900 |
| H | -8.22647300 | 2.65384400  | 0.76327300  |
| H | -7.93384400 | 4.33744200  | 0.31730100  |
| H | -8.50801100 | 3.19266100  | -0.90791600 |
| C | 3.32084300  | 3.68312800  | -3.32045000 |
| H | 3.81875700  | 2.74726600  | -3.04061800 |
| H | 2.28235100  | 3.41488600  | -3.54615500 |
| H | 3.78635800  | 4.05809000  | -4.23687900 |
| C | 2.30466300  | 5.07708400  | 1.44678300  |
| H | 1.22227800  | 4.91808300  | 1.36841100  |
| H | 2.72623800  | 4.16179100  | 1.87961400  |
| H | 2.47759300  | 5.89756900  | 2.14962700  |
| C | 4.83191800  | 8.20594600  | -1.62472400 |
| H | 5.66573400  | 8.10479000  | -2.32812000 |
| H | 4.13202000  | 8.93549200  | -2.05373700 |
| H | 5.22121600  | 8.63540900  | -0.69537300 |
| C | 5.47764700  | -2.31316100 | -1.11457400 |
| H | 4.62281200  | -2.91657100 | -1.44166300 |

|   |             |             |             |
|---|-------------|-------------|-------------|
| H | 5.27046900  | -1.28436100 | -1.43141700 |
| H | 6.36557500  | -2.66328000 | -1.64929700 |
| C | 3.82585500  | -1.49565500 | 3.62406100  |
| H | 3.36340000  | -0.56281200 | 3.28551600  |
| H | 3.01929000  | -2.23184100 | 3.72867600  |
| H | 4.24822500  | -1.32721200 | 4.61967600  |
| C | 8.33182400  | -3.64055000 | 2.83957000  |
| H | 8.25631100  | -4.73576300 | 2.86903600  |
| H | 9.19880500  | -3.39349100 | 2.21671600  |
| H | 8.53787400  | -3.29938200 | 3.85955400  |
| C | -4.84405500 | 0.11436100  | 3.00328800  |
| C | -3.84800900 | 0.25055900  | 3.97331900  |
| C | -3.42421500 | -1.27743300 | 1.68684900  |
| C | -4.65534800 | -0.66952000 | 1.86352600  |
| H | -5.44416300 | -0.74888500 | 1.12650300  |
| C | -2.37805700 | -1.11956600 | 2.61836000  |
| C | -2.61273000 | -0.36811900 | 3.79985200  |
| C | -0.05398500 | -1.73615200 | 3.45322000  |
| C | -0.11638700 | -0.46313600 | 4.30843600  |
| C | -1.53453800 | -0.25101700 | 4.86173900  |
| C | -1.03987900 | -1.63054100 | 2.30649300  |
| H | 0.95153600  | -1.88285000 | 3.04791300  |
| H | 0.59994800  | -0.51633000 | 5.13676400  |
| H | -0.51617300 | -0.66494400 | 1.59713500  |
| H | -1.02265100 | -2.45429100 | 1.59215300  |
| H | -1.61181400 | 0.72297300  | 5.35992700  |
| H | -0.28684500 | -2.61879500 | 4.07139700  |
| H | 0.16790700  | 0.38702500  | 3.67733100  |
| H | -4.04164500 | 0.86879600  | 4.84278500  |
| H | -3.24169900 | -1.85314800 | 0.78811800  |
| N | -6.07790400 | 0.88188800  | 3.13190200  |
| O | -7.01170100 | 0.61449500  | 2.37089300  |
| O | -6.10892300 | 1.78752900  | 3.97269800  |

**cat2/b7**

|   |             |             |             |
|---|-------------|-------------|-------------|
| C | -1.10812700 | -2.08251500 | -1.52279200 |
| C | -2.44867200 | -2.59127200 | -1.68289000 |
| C | -3.29416800 | -1.58494300 | -1.32273400 |
| C | -2.47273300 | -0.43100100 | -1.03203300 |
| N | -1.14640100 | -0.77703800 | -1.11638300 |
| H | -2.69262800 | -3.59683900 | -1.99551700 |
| H | -4.37192700 | -1.60513000 | -1.27356300 |
| C | -0.36086900 | 3.31380500  | -0.87523300 |
| C | -1.50681300 | 4.16774900  | -1.09173000 |

|    |             |             |             |
|----|-------------|-------------|-------------|
| C  | -2.60302200 | 3.36157000  | -1.06286000 |
| C  | -2.12028400 | 2.01082400  | -0.87324100 |
| N  | -0.76461900 | 2.00498300  | -0.77652100 |
| H  | -1.45901700 | 5.23930600  | -1.22332000 |
| H  | -3.64394700 | 3.62927700  | -1.17684600 |
| C  | 2.90519400  | -1.24618100 | -0.31116700 |
| C  | 3.46574900  | -2.54809400 | -0.59244600 |
| C  | 2.49353000  | -3.26711300 | -1.22471900 |
| C  | 1.32081400  | -2.42791700 | -1.26680700 |
| N  | 1.60350500  | -1.20122400 | -0.71659900 |
| H  | 4.47319400  | -2.85133100 | -0.34690100 |
| H  | 2.53762200  | -4.28049600 | -1.59756700 |
| C  | 3.19374600  | 1.16040900  | 0.18182600  |
| C  | 4.03085600  | 2.30637100  | 0.46291200  |
| C  | 3.30596600  | 3.40893500  | 0.12567400  |
| C  | 2.01194000  | 2.93442100  | -0.31270200 |
| N  | 1.96863000  | 1.57580700  | -0.26997400 |
| H  | 5.04601400  | 2.25083900  | 0.82976000  |
| H  | 3.59515600  | 4.44923300  | 0.17201700  |
| C  | 0.05651600  | -2.85027800 | -1.69001700 |
| C  | 0.94310700  | 3.77254900  | -0.68187000 |
| C  | -2.95727200 | 0.87683000  | -0.85023100 |
| C  | 3.63409400  | -0.16413800 | 0.22680100  |
| Fe | 0.40263000  | 0.38710300  | -0.64612800 |
| Cl | 0.83377300  | 0.68878000  | -2.96913300 |
| O  | 0.13536500  | 0.27743900  | 1.05554200  |
| H  | -0.12696000 | -0.84345200 | 1.52069200  |
| C  | 1.63224400  | -2.79598000 | 5.10080800  |
| C  | 2.73839900  | -3.38757100 | 4.48617600  |
| C  | 2.75181600  | -3.52566300 | 3.09535300  |
| C  | 1.67845800  | -3.06692900 | 2.33950800  |
| C  | 0.55857500  | -2.45448300 | 2.93869700  |
| C  | 0.55599400  | -2.33576000 | 4.34133700  |
| H  | 1.60042800  | -2.69731100 | 6.18286900  |
| H  | 3.60192700  | -3.98190200 | 2.59535400  |
| H  | 1.70345000  | -3.17471300 | 1.26314700  |
| H  | -0.30157000 | -1.91245700 | 4.85075400  |
| C  | -0.52957200 | -1.98876800 | 2.04141700  |
| H  | -0.57025500 | -2.58799900 | 1.13095300  |
| C  | -1.88528800 | -1.65118100 | 2.53050000  |
| C  | -2.11095400 | -0.69027300 | 3.53832400  |
| C  | -3.00843000 | -2.22651700 | 1.90387200  |
| C  | -3.39848400 | -0.32322100 | 3.90567000  |
| H  | -1.26645900 | -0.18444500 | 3.99295600  |

|   |             |             |             |
|---|-------------|-------------|-------------|
| C | -4.30201700 | -1.85403100 | 2.24178100  |
| C | -4.48420900 | -0.89506200 | 3.23824500  |
| H | -3.57511100 | 0.43566700  | 4.65740100  |
| H | -5.16414500 | -2.26722100 | 1.73320700  |
| C | -4.41843400 | 1.08164900  | -0.62717400 |
| C | -5.37671900 | 0.79177900  | -1.61906700 |
| C | -4.83567100 | 1.52309700  | 0.65631300  |
| C | -6.73502500 | 0.82536900  | -1.27583900 |
| C | -6.19776900 | 1.52775700  | 0.95261700  |
| C | -7.16311000 | 1.14716900  | 0.01225700  |
| H | -7.47288100 | 0.58629000  | -2.03963300 |
| H | -6.51613600 | 1.80817300  | 1.95399600  |
| C | -0.06109400 | -4.18610400 | -2.35320500 |
| C | -0.32816400 | -5.35204800 | -1.61159200 |
| C | 0.10309300  | -4.24274000 | -3.75294600 |
| C | -0.42558700 | -6.57163100 | -2.29047000 |
| C | -0.00140700 | -5.48353500 | -4.38807800 |
| C | -0.26182200 | -6.65888100 | -3.67592200 |
| H | -0.63447400 | -7.47496400 | -1.72091300 |
| H | 0.12198700  | -5.53168900 | -5.46820100 |
| C | 1.21853700  | 5.23315300  | -0.83698800 |
| C | 1.73742400  | 5.69462500  | -2.06312800 |
| C | 0.96386200  | 6.12494800  | 0.22207900  |
| C | 1.98203600  | 7.06325400  | -2.21101500 |
| C | 1.22908200  | 7.48466500  | 0.03072700  |
| C | 1.73722000  | 7.97295900  | -1.17718100 |
| H | 2.37328700  | 7.42707400  | -3.15906900 |
| H | 1.03287900  | 8.17873400  | 0.84561400  |
| C | 4.97260200  | -0.44369200 | 0.83011500  |
| C | 5.07049900  | -0.52815900 | 2.23407200  |
| C | 6.11143800  | -0.60603400 | 0.01559300  |
| C | 6.31161000  | -0.84123300 | 2.79803900  |
| C | 7.33277200  | -0.90746400 | 0.62578600  |
| C | 7.44999700  | -1.04631800 | 2.01292200  |
| H | 6.39021000  | -0.91808900 | 3.88078900  |
| H | 8.21598500  | -1.03025200 | 0.00204800  |
| C | 3.88218900  | -0.22922900 | 3.12042100  |
| H | 3.72248500  | 0.85467200  | 3.19027900  |
| H | 2.95501500  | -0.66046300 | 2.73509600  |
| H | 4.03632800  | -0.61656100 | 4.13115100  |
| C | 6.02550200  | -0.42240200 | -1.48326300 |
| H | 5.42055200  | -1.20379700 | -1.95708200 |
| H | 5.55220400  | 0.53344000  | -1.73668500 |
| H | 7.01990000  | -0.44256800 | -1.93933200 |

|   |             |             |             |
|---|-------------|-------------|-------------|
| C | 8.77044500  | -1.42103400 | 2.64467600  |
| H | 8.87058200  | -2.51141500 | 2.73080600  |
| H | 9.61715800  | -1.06348000 | 2.04867700  |
| H | 8.86561800  | -1.00572600 | 3.65385900  |
| C | 0.41698500  | 5.62330400  | 1.53972800  |
| H | -0.58832000 | 5.20162100  | 1.42051300  |
| H | 1.04528300  | 4.82529100  | 1.95319500  |
| H | 0.36128100  | 6.42995800  | 2.27686300  |
| C | 2.03008300  | 4.72714600  | -3.18741200 |
| H | 2.86408400  | 4.06355800  | -2.92749300 |
| H | 1.17848100  | 4.07059400  | -3.39769600 |
| H | 2.29419800  | 5.25885000  | -4.10656100 |
| C | 2.04368200  | 9.44242500  | -1.35141600 |
| H | 3.08893900  | 9.66050500  | -1.09425300 |
| H | 1.89100400  | 9.76390200  | -2.38751700 |
| H | 1.41331200  | 10.06381300 | -0.70623400 |
| C | -3.85247000 | 2.00221800  | 1.70171900  |
| H | -2.96060700 | 1.37335300  | 1.76105600  |
| H | -3.50895800 | 3.01778200  | 1.46997700  |
| H | -4.32523600 | 2.02512400  | 2.68661300  |
| C | -4.99339800 | 0.48662700  | -3.05374800 |
| H | -3.94541100 | 0.71701900  | -3.26072300 |
| H | -5.15263300 | -0.56863400 | -3.30619200 |
| H | -5.61117600 | 1.07800300  | -3.73926600 |
| C | -8.61799600 | 1.09522000  | 0.40935300  |
| H | -8.74905300 | 0.42341600  | 1.26643300  |
| H | -8.98432700 | 2.08350700  | 0.71449100  |
| H | -9.25073900 | 0.73841500  | -0.40964500 |
| C | 0.38234000  | -2.98630100 | -4.54562100 |
| H | -0.41189000 | -2.24226700 | -4.41570300 |
| H | 1.30337800  | -2.49445300 | -4.21292400 |
| H | 0.47559500  | -3.20699800 | -5.61320100 |
| C | -0.51774600 | -5.29697500 | -0.11299600 |
| H | 0.35730000  | -4.87383700 | 0.39271800  |
| H | -1.37440900 | -4.66827800 | 0.15757900  |
| H | -0.69286500 | -6.29435500 | 0.30108000  |
| C | -0.33621100 | -7.99133500 | -4.38462500 |
| H | 0.66359500  | -8.42903600 | -4.50686600 |
| H | -0.94158400 | -8.71187400 | -3.82436900 |
| H | -0.76911100 | -7.88925100 | -5.38587100 |
| H | 3.57468300  | -3.74139000 | 5.08286800  |
| H | -2.85771400 | -2.95203800 | 1.11276800  |
| N | -5.83367300 | -0.41293000 | 3.52005500  |
| O | -5.95163800 | 0.57484700  | 4.25372200  |

|                |             |             |             |
|----------------|-------------|-------------|-------------|
| O              | -6.78214600 | -0.99163100 | 2.98587600  |
| <b>cat2/b8</b> |             |             |             |
| C              | 2.52188600  | 0.24293100  | -1.26802200 |
| C              | 3.57593000  | -0.63095000 | -1.73321400 |
| C              | 2.98413000  | -1.80412100 | -2.09678000 |
| C              | 1.58153500  | -1.67298100 | -1.78743300 |
| N              | 1.32583200  | -0.41740100 | -1.29208100 |
| H              | 4.62172900  | -0.36532900 | -1.78303100 |
| H              | 3.44410900  | -2.69350600 | -2.50322200 |
| C              | -2.46650700 | -1.87512300 | -0.38527600 |
| C              | -2.62898900 | -3.30470000 | -0.52175500 |
| C              | -1.51903300 | -3.76756300 | -1.16487100 |
| C              | -0.64900500 | -2.63306900 | -1.35530200 |
| N              | -1.23705500 | -1.50022700 | -0.86541500 |
| H              | -3.49607600 | -3.86060100 | -0.19539400 |
| H              | -1.28457300 | -4.77909600 | -1.46454600 |
| C              | -0.35381800 | 3.36417400  | -0.67783500 |
| C              | 0.57485700  | 4.47210600  | -0.64599700 |
| C              | 1.82411100  | 3.93200900  | -0.65667900 |
| C              | 1.65345000  | 2.49835700  | -0.74156000 |
| N              | 0.32271200  | 2.18119900  | -0.74040000 |
| H              | 0.28793200  | 5.51314900  | -0.60528900 |
| H              | 2.77998100  | 4.43602900  | -0.64151000 |
| C              | -2.61929300 | 2.42248200  | -0.41195000 |
| C              | -4.03015700 | 2.55465500  | -0.12832100 |
| C              | -4.49519300 | 1.30050900  | 0.12354600  |
| C              | -3.37558100 | 0.40119700  | -0.04958400 |
| N              | -2.25427500 | 1.10297700  | -0.37783100 |
| H              | -4.56805600 | 3.49165900  | -0.10803100 |
| H              | -5.49798300 | 0.99045200  | 0.38058000  |
| C              | 2.70806400  | 1.59676700  | -0.91856800 |
| C              | -3.47129000 | -0.99677800 | 0.04973400  |
| C              | 0.65213400  | -2.71529000 | -1.87864200 |
| C              | -1.74786200 | 3.50192300  | -0.59129200 |
| Fe             | -0.44730900 | 0.32793500  | -0.75635600 |
| Cl             | -0.92266200 | 0.63306200  | -3.05789100 |
| O              | -0.13181000 | 0.18818800  | 0.92261700  |
| H              | 0.26992400  | -0.91126700 | 1.31785900  |
| C              | 4.14783300  | -0.73599800 | 3.87172000  |
| C              | 4.31688600  | -0.89543500 | 2.49193400  |
| C              | 3.25517500  | -1.36949100 | 1.72574800  |
| C              | 2.04497100  | -1.66993500 | 2.35158600  |
| C              | 1.91291700  | -1.56035100 | 3.76503700  |



|   |             |             |             |
|---|-------------|-------------|-------------|
| C | 2.96617100  | -1.08630900 | 4.53594200  |
| H | 3.36743300  | -1.48058700 | 0.65411400  |
| H | 2.89912800  | -0.97021500 | 5.61110300  |
| C | 0.75085000  | -2.06554800 | 1.77659300  |
| C | -0.09486100 | -2.40952200 | 2.93425800  |
| C | -1.36375600 | -2.98510000 | 2.98904500  |
| C | -1.96318200 | -3.18028700 | 4.23737300  |
| C | -1.31082400 | -2.79247200 | 5.41507600  |
| C | -0.03370400 | -2.22070400 | 5.36980500  |
| C | 0.57667600  | -2.04093900 | 4.13069700  |
| H | -1.87638100 | -3.27442100 | 2.07651000  |
| H | -1.79647100 | -2.94597500 | 6.37495400  |
| H | 0.47672300  | -1.93966400 | 6.28750200  |
| C | 1.06309000  | -3.98267200 | -2.55887400 |
| C | 0.76518200  | -4.11958500 | -3.93098600 |
| C | 1.73365700  | -5.00505900 | -1.86133600 |
| C | 1.15911000  | -5.28948400 | -4.58620800 |
| C | 2.10707100  | -6.15898800 | -2.55904900 |
| C | 1.82894800  | -6.32063600 | -3.91926300 |
| H | 0.93907800  | -5.39619300 | -5.64659700 |
| H | 2.62925100  | -6.94986300 | -2.02447600 |
| C | -4.73452600 | -1.56760200 | 0.60853500  |
| C | -4.95753200 | -1.48327200 | 1.99964900  |
| C | -5.69678000 | -2.15695700 | -0.23911300 |
| C | -6.11403900 | -2.06658200 | 2.52779400  |
| C | -6.84380500 | -2.71298900 | 0.33482800  |
| C | -7.06185300 | -2.69661900 | 1.71650000  |
| H | -6.28225100 | -2.01538000 | 3.60182400  |
| H | -7.59144800 | -3.16203800 | -0.31599300 |
| C | -2.32634300 | 4.87937800  | -0.64225100 |
| C | -2.54191600 | 5.60219800  | 0.54649700  |
| C | -2.65416800 | 5.43123900  | -1.89586900 |
| C | -3.09409600 | 6.88373200  | 0.45901900  |
| C | -3.20571500 | 6.71562900  | -1.93500300 |
| C | -3.43038100 | 7.45806300  | -0.77127200 |
| H | -3.26621200 | 7.44623200  | 1.37454700  |
| H | -3.46701400 | 7.14556000  | -2.89987700 |
| C | 4.10766200  | 2.09924900  | -0.76708700 |
| C | 4.61809600  | 2.29800900  | 0.53378400  |
| C | 4.91207600  | 2.34539900  | -1.89989500 |
| C | 5.96617600  | 2.64344300  | 0.67773200  |
| C | 6.24628200  | 2.71473200  | -1.70559900 |
| C | 6.79828100  | 2.84613500  | -0.42681500 |
| H | 6.37208700  | 2.75285200  | 1.68118900  |

|   |             |             |             |
|---|-------------|-------------|-------------|
| H | 6.87052300  | 2.90425600  | -2.57661900 |
| C | 2.03302300  | -4.87710800 | -0.38509900 |
| H | 2.57705400  | -3.95361100 | -0.15815300 |
| H | 1.10919600  | -4.85574800 | 0.20612700  |
| H | 2.63508000  | -5.71834000 | -0.02929200 |
| C | 0.03134900  | -3.02550400 | -4.67235600 |
| H | -0.98914500 | -2.90283900 | -4.28996300 |
| H | 0.51472300  | -2.05022100 | -4.54831800 |
| H | -0.03076700 | -3.24776100 | -5.74185300 |
| C | 2.21591200  | -7.58670600 | -4.64750700 |
| H | 3.04751700  | -8.09842800 | -4.15161900 |
| H | 1.37446800  | -8.29131100 | -4.68707000 |
| H | 2.51250100  | -7.37892400 | -5.68155300 |
| C | 3.73933100  | 2.20609500  | 1.76195800  |
| H | 3.22210000  | 3.16096200  | 1.92523400  |
| H | 2.96681600  | 1.43838200  | 1.67788400  |
| H | 4.34073600  | 1.99191400  | 2.64953900  |
| C | 4.34425200  | 2.24799300  | -3.29958800 |
| H | 4.14848000  | 1.21122500  | -3.59585400 |
| H | 3.38913700  | 2.77985600  | -3.37736200 |
| H | 5.03469900  | 2.67970700  | -4.03052700 |
| C | 8.24426600  | 3.24261700  | -0.24104200 |
| H | 8.34237700  | 4.32943400  | -0.11720400 |
| H | 8.67415500  | 2.77484000  | 0.65122300  |
| H | 8.85414500  | 2.95616500  | -1.10450500 |
| C | -2.18391800 | 5.00224600  | 1.88714600  |
| H | -2.75104700 | 4.08301900  | 2.07729900  |
| H | -1.12242900 | 4.72999100  | 1.92982400  |
| H | -2.38851900 | 5.70293600  | 2.70213200  |
| C | -3.99423300 | 8.85825400  | -0.84277600 |
| H | -4.64806600 | 8.98410900  | -1.71251700 |
| H | -4.57098100 | 9.10568400  | 0.05507600  |
| H | -3.19093100 | 9.60221600  | -0.92888300 |
| C | -2.41090700 | 4.64851500  | -3.16594400 |
| H | -1.34294400 | 4.44508300  | -3.30949700 |
| H | -2.90265300 | 3.66941000  | -3.13970900 |
| H | -2.77470000 | 5.19379400  | -4.04199500 |
| C | -4.01161000 | -0.73101000 | 2.90997600  |
| H | -4.10872900 | -1.06906500 | 3.94565400  |
| H | -2.96461500 | -0.84521300 | 2.62035400  |
| H | -4.23429900 | 0.34371700  | 2.88380000  |
| C | -5.52697000 | -2.15304700 | -1.74317500 |
| H | -5.19515100 | -1.17321500 | -2.10431200 |
| H | -4.77536600 | -2.87875900 | -2.07401300 |

|   |             |             |             |
|---|-------------|-------------|-------------|
| H | -6.47021400 | -2.39838500 | -2.24064200 |
| C | -8.28560300 | -3.34907400 | 2.31561200  |
| H | -8.58182100 | -2.86373500 | 3.25173200  |
| H | -9.13781200 | -3.31242800 | 1.62831400  |
| H | -8.09600600 | -4.40680800 | 2.54251400  |
| H | 0.71518300  | -2.66456900 | 0.87163400  |
| H | -2.95120600 | -3.62976700 | 4.29109000  |
| H | 5.25654800  | -0.60970200 | 2.03608400  |
| N | 5.23934500  | -0.14365700 | 4.64538100  |
| O | 6.16103300  | 0.39563600  | 4.02217000  |
| O | 5.17540900  | -0.19696500 | 5.87495500  |

**cat2/b9**

|   |             |             |             |
|---|-------------|-------------|-------------|
| C | 1.31187900  | -2.13118200 | -0.98482300 |
| C | 1.33632700  | -3.57509700 | -0.97717800 |
| C | 0.05655300  | -3.98504200 | -0.77697400 |
| C | -0.74668600 | -2.79220000 | -0.64722500 |
| N | 0.04278900  | -1.67250400 | -0.72278600 |
| H | 2.22352200  | -4.17384100 | -1.12266100 |
| H | -0.32993700 | -4.99224300 | -0.72156600 |
| C | -3.54131700 | 0.42955700  | -0.14289000 |
| C | -4.73942800 | -0.36932700 | -0.06021000 |
| C | -4.36051900 | -1.66427800 | -0.24583700 |
| C | -2.92711300 | -1.65668700 | -0.40189300 |
| N | -2.44908100 | -0.37302100 | -0.34266100 |
| H | -5.73234000 | 0.02696500  | 0.09625200  |
| H | -4.97779400 | -2.55040200 | -0.26725300 |
| C | 1.72135500  | 2.13930200  | -1.35717600 |
| C | 3.10344500  | 2.15637500  | -1.77629300 |
| C | 3.50753300  | 0.85945000  | -1.84232100 |
| C | 2.37518300  | 0.05349700  | -1.44844500 |
| N | 1.29885500  | 0.84794300  | -1.16961500 |
| H | 3.66971400  | 3.05116400  | -1.99064000 |
| H | 4.47461500  | 0.46734700  | -2.12135400 |
| C | -0.39681300 | 3.28960600  | -0.80339700 |
| C | -1.16758500 | 4.48552500  | -0.54218400 |
| C | -2.42441900 | 4.07493100  | -0.22332900 |
| C | -2.41718000 | 2.63046500  | -0.29589400 |
| N | -1.17403600 | 2.17859400  | -0.65010500 |
| H | -0.77937700 | 5.49230100  | -0.60080300 |
| H | -3.28690600 | 4.67353000  | 0.03255300  |
| C | 2.40470500  | -1.34725000 | -1.37256700 |
| C | -3.54088800 | 1.83059100  | -0.06888400 |
| C | -2.14617000 | -2.80877100 | -0.56819100 |

|    |             |             |             |
|----|-------------|-------------|-------------|
| C  | 0.95795500  | 3.29502300  | -1.16431800 |
| Fe | -0.55685000 | 0.24255300  | -0.66743700 |
| Cl | -1.03730900 | 0.12742400  | -2.97547400 |
| O  | -0.25416400 | 0.54627900  | 0.99934100  |
| H  | 0.08830100  | -0.29135900 | 1.79917700  |
| C  | 2.03336600  | -4.76946100 | 2.78353700  |
| C  | 0.66342900  | -4.61873500 | 2.54472500  |
| C  | 0.06188300  | -3.35749800 | 2.58064200  |
| C  | 0.83312700  | -2.22970200 | 2.86568300  |
| C  | 2.22555200  | -2.39104000 | 3.07765500  |
| C  | 2.82641000  | -3.64845500 | 3.04426900  |
| H  | 2.48533500  | -5.75687700 | 2.75153100  |
| H  | -0.98687100 | -3.26093600 | 2.34527900  |
| H  | 3.89489500  | -3.75475800 | 3.21346700  |
| C  | 0.46119300  | -0.78569700 | 2.98212200  |
| C  | 1.77969800  | -0.10050200 | 3.15560100  |
| C  | 2.11414200  | 1.25834500  | 3.10187300  |
| C  | 3.44867900  | 1.64607000  | 3.21052200  |
| C  | 4.44092900  | 0.67109500  | 3.35498600  |
| C  | 4.14705300  | -0.69281800 | 3.37531500  |
| C  | 2.81555500  | -1.06620000 | 3.24913800  |
| H  | 1.35581500  | 2.00961700  | 2.92936000  |
| H  | 4.94882800  | -1.41685200 | 3.44790600  |
| C  | -0.74778400 | -0.39424300 | 3.89086100  |
| C  | -2.07075000 | -0.95878400 | 3.33081000  |
| C  | -0.50052600 | -0.97092400 | 5.30370800  |
| C  | -0.91148100 | 1.13516400  | 4.00622000  |
| H  | -2.21352800 | -0.65640900 | 2.28917900  |
| H  | -2.11374500 | -2.04789700 | 3.39459300  |
| H  | -2.91178800 | -0.57417100 | 3.91954200  |
| H  | 0.43474100  | -0.58411100 | 5.72478000  |
| H  | -1.31985600 | -0.68655100 | 5.97555000  |
| H  | -0.43800900 | -2.06375200 | 5.28351100  |
| H  | -1.81965000 | 1.35927200  | 4.57799300  |
| H  | -0.07364600 | 1.59331700  | 4.53928000  |
| H  | -1.00338600 | 1.59294100  | 3.01739000  |
| C  | -2.84915700 | -4.10766900 | -0.82321900 |
| C  | -2.92745200 | -4.54827100 | -2.16657900 |
| C  | -3.44188400 | -4.86148000 | 0.20724300  |
| C  | -3.59381400 | -5.74410200 | -2.44220000 |
| C  | -4.09703700 | -6.05548600 | -0.11963500 |
| C  | -4.18465900 | -6.51445500 | -1.43447800 |
| H  | -3.65941400 | -6.08054100 | -3.47509000 |
| H  | -4.55226100 | -6.63789500 | 0.67917300  |

|   |             |             |             |
|---|-------------|-------------|-------------|
| C | -4.83693800 | 2.51429100  | 0.23514400  |
| C | -5.24882300 | 2.66132000  | 1.57328200  |
| C | -5.63317700 | 2.99717300  | -0.82190700 |
| C | -6.46338100 | 3.30265000  | 1.83517800  |
| C | -6.84261200 | 3.62771300  | -0.51398100 |
| C | -7.27292000 | 3.79447000  | 0.80642600  |
| H | -6.78464100 | 3.41924900  | 2.86833500  |
| H | -7.46472500 | 3.99636900  | -1.32718900 |
| C | 1.63111300  | 4.61853100  | -1.34557200 |
| C | 2.40046900  | 5.15716000  | -0.29587500 |
| C | 1.48602800  | 5.31206600  | -2.56278000 |
| C | 3.01852300  | 6.39692500  | -0.48458700 |
| C | 2.12551300  | 6.54687900  | -2.70914100 |
| C | 2.89707100  | 7.10474700  | -1.68457200 |
| H | 3.60969600  | 6.81896800  | 0.32554900  |
| H | 2.01901400  | 7.08546100  | -3.64873200 |
| C | 3.63422700  | -2.04324600 | -1.87189600 |
| C | 4.76635900  | -2.19332200 | -1.04885700 |
| C | 3.64136400  | -2.52095800 | -3.19950400 |
| C | 5.89623300  | -2.83305900 | -1.56727400 |
| C | 4.79476500  | -3.15181000 | -3.67608000 |
| C | 5.93125600  | -3.31730600 | -2.87841500 |
| H | 6.76977700  | -2.95390100 | -0.92975900 |
| H | 4.80559400  | -3.51998200 | -4.70010200 |
| C | -3.36542500 | -4.44488200 | 1.65941800  |
| H | -2.47222900 | -4.86258500 | 2.14125900  |
| H | -3.32857400 | -3.35931500 | 1.77872400  |
| H | -4.23204900 | -4.81424200 | 2.21753100  |
| C | -2.30122900 | -3.75585100 | -3.29375000 |
| H | -2.48052000 | -2.67921200 | -3.20281100 |
| H | -1.21131900 | -3.88144300 | -3.30401000 |
| H | -2.68526800 | -4.09001700 | -4.26243300 |
| C | -4.92553800 | -7.78717100 | -1.77168200 |
| H | -5.03750700 | -8.43268400 | -0.89429800 |
| H | -5.93273500 | -7.56806000 | -2.15028700 |
| H | -4.40593000 | -8.35773800 | -2.54975800 |
| C | 4.74750700  | -1.69420000 | 0.37384500  |
| H | 4.46439800  | -0.63775100 | 0.42978700  |
| H | 4.01072600  | -2.24579100 | 0.96698500  |
| H | 5.72455600  | -1.80313000 | 0.85433300  |
| C | 2.43031200  | -2.36496700 | -4.09220200 |
| H | 1.61084200  | -3.01675000 | -3.76507900 |
| H | 2.03441200  | -1.34352500 | -4.07320400 |
| H | 2.67198300  | -2.62155600 | -5.12806900 |

|   |             |             |             |
|---|-------------|-------------|-------------|
| C | 7.17645600  | -3.97167500 | -3.43008700 |
| H | 7.84119400  | -3.22815000 | -3.88987000 |
| H | 7.74783500  | -4.47534700 | -2.64286500 |
| H | 6.93346400  | -4.71107400 | -4.20097900 |
| C | 2.55039100  | 4.40987000  | 1.00959700  |
| H | 1.57274300  | 4.17339700  | 1.44733700  |
| H | 3.06661500  | 3.45423000  | 0.86419200  |
| H | 3.12024900  | 4.99530200  | 1.73761300  |
| C | 3.60679100  | 8.42407600  | -1.88155800 |
| H | 3.04656100  | 9.08529500  | -2.55162500 |
| H | 3.75339000  | 8.94777100  | -0.93080600 |
| H | 4.59916600  | 8.27409800  | -2.32742100 |
| C | 0.65462700  | 4.73371000  | -3.68530200 |
| H | 0.95687100  | 3.70716200  | -3.92221300 |
| H | -0.40652200 | 4.68845200  | -3.41146600 |
| H | 0.74451800  | 5.33640500  | -4.59404900 |
| C | -4.39469400 | 2.13066000  | 2.70148600  |
| H | -4.29594100 | 1.04041600  | 2.64541800  |
| H | -3.37694500 | 2.53522900  | 2.65972400  |
| H | -4.82243000 | 2.38357300  | 3.67645800  |
| C | -5.19011800 | 2.83030800  | -2.25751100 |
| H | -4.27128800 | 3.39459500  | -2.45725000 |
| H | -4.96617900 | 1.78246100  | -2.48903700 |
| H | -5.96071200 | 3.17839400  | -2.95181500 |
| C | -8.56615800 | 4.51291300  | 1.11402300  |
| H | -9.00399600 | 4.16613000  | 2.05625100  |
| H | -8.40308000 | 5.59485900  | 1.20894300  |
| H | -9.30634600 | 4.36502800  | 0.32013800  |
| H | 0.05790100  | -5.49029600 | 2.30953800  |
| H | 3.73573100  | 2.68875600  | 3.16664200  |
| N | 5.84357300  | 1.09028500  | 3.43216800  |
| O | 6.08614600  | 2.29879500  | 3.44746000  |
| O | 6.70607400  | 0.20886500  | 3.46980200  |

**cat2/b10**

|   |             |             |             |
|---|-------------|-------------|-------------|
| C | 3.01446600  | -1.55067600 | -0.60469800 |
| C | 3.44324600  | -2.92824500 | -0.57930400 |
| C | 2.32044500  | -3.69070100 | -0.68866900 |
| C | 1.20764400  | -2.77736100 | -0.76294500 |
| N | 1.64708800  | -1.48292600 | -0.70809100 |
| H | 4.47110800  | -3.25043700 | -0.49543000 |
| H | 2.23396400  | -4.76717200 | -0.70845700 |
| C | -2.40149700 | -0.48456600 | -1.20828700 |
| C | -3.31980900 | -1.59689700 | -1.27555100 |

|    |             |             |             |
|----|-------------|-------------|-------------|
| C  | -2.57744500 | -2.72699500 | -1.12689300 |
| C  | -1.20926100 | -2.30309700 | -0.95340100 |
| N  | -1.12936300 | -0.92966200 | -0.96455300 |
| H  | -4.38526900 | -1.50417700 | -1.42732500 |
| H  | -2.90468600 | -3.75678900 | -1.13753800 |
| C  | 2.27604500  | 2.68918800  | -0.65203900 |
| C  | 3.64208800  | 3.12040900  | -0.45677200 |
| C  | 4.40341000  | 1.99430200  | -0.42847500 |
| C  | 3.49522900  | 0.87802200  | -0.57668600 |
| N  | 2.21293800  | 1.32499600  | -0.72670100 |
| H  | 3.95460200  | 4.15128100  | -0.37146300 |
| H  | 5.47390500  | 1.90487400  | -0.31223100 |
| C  | -0.11946000 | 3.15148000  | -1.04654000 |
| C  | -1.19556700 | 4.06636500  | -1.34864600 |
| C  | -2.29563600 | 3.30519300  | -1.59286100 |
| C  | -1.89918600 | 1.93022000  | -1.39548300 |
| N  | -0.56534600 | 1.86057300  | -1.09015300 |
| H  | -1.09535800 | 5.14154900  | -1.38387400 |
| H  | -3.28965800 | 3.62487200  | -1.86871000 |
| C  | 3.89519900  | -0.46377200 | -0.53428600 |
| C  | -2.77994000 | 0.84590000  | -1.46121800 |
| C  | -0.12861100 | -3.18629000 | -0.89286200 |
| C  | 1.19286300  | 3.56449700  | -0.77919800 |
| Fe | 0.53072500  | 0.19034600  | -0.80958500 |
| Cl | 0.76855400  | 0.08238000  | -3.15580700 |
| O  | 0.48869300  | 0.40817900  | 0.88269100  |
| H  | -0.17012400 | -0.22223300 | 1.70248200  |
| C  | -0.53081300 | 3.12777900  | 4.82462600  |
| C  | 0.70670000  | 2.49088400  | 4.64984300  |
| C  | 0.78476900  | 1.23075900  | 4.05048500  |
| C  | -0.39357200 | 0.61300900  | 3.63703700  |
| C  | -1.64404100 | 1.25044900  | 3.82069400  |
| C  | -1.71616000 | 2.51160200  | 4.41122500  |
| H  | -0.56909400 | 4.10947100  | 5.28892000  |
| H  | 1.61538500  | 2.98640700  | 4.98106000  |
| H  | 1.74127600  | 0.73823000  | 3.90182800  |
| H  | -2.67399800 | 3.00627700  | 4.55145500  |
| C  | -0.58379800 | -0.66323000 | 2.89292400  |
| C  | -2.04878100 | -0.79635500 | 2.76808100  |
| C  | -2.80495500 | -1.81973400 | 2.19605700  |
| C  | -4.19059600 | -1.69321300 | 2.13688800  |
| C  | -4.79585900 | -0.54257200 | 2.65528200  |
| C  | -4.06409700 | 0.49482800  | 3.24492000  |
| C  | -2.68308400 | 0.36471000  | 3.29195900  |

|   |             |             |             |
|---|-------------|-------------|-------------|
| H | -2.31645900 | -2.69093600 | 1.77583500  |
| H | -4.80868300 | -2.45681800 | 1.68275600  |
| H | -4.58043500 | 1.36628700  | 3.62816400  |
| C | -0.39628600 | -4.64396100 | -1.11414700 |
| C | -0.47234800 | -5.10586200 | -2.44777300 |
| C | -0.54856300 | -5.53439200 | -0.03750800 |
| C | -0.69896500 | -6.46506400 | -2.67273500 |
| C | -0.77257200 | -6.88951600 | -0.31258900 |
| C | -0.85405900 | -7.37390600 | -1.61897500 |
| H | -0.74909300 | -6.82637600 | -3.69805600 |
| H | -0.88367200 | -7.58074300 | 0.52072000  |
| C | -4.19388900 | 1.10270000  | -1.87694400 |
| C | -5.11734800 | 1.66850800  | -0.97580300 |
| C | -4.58766900 | 0.76177400  | -3.19010700 |
| C | -6.44084900 | 1.84651400  | -1.39216900 |
| C | -5.91583900 | 0.97779400  | -3.56661200 |
| C | -6.86004400 | 1.50894200  | -2.68136700 |
| H | -7.16005600 | 2.25574600  | -0.68555400 |
| H | -6.22235400 | 0.71925800  | -4.57831900 |
| C | 1.44418700  | 5.03001000  | -0.62312600 |
| C | 1.21966000  | 5.63009600  | 0.63000900  |
| C | 1.88951200  | 5.79157500  | -1.72237300 |
| C | 1.45692700  | 7.00325900  | 0.76438800  |
| C | 2.10801200  | 7.15934100  | -1.54255600 |
| C | 1.89957600  | 7.78349400  | -0.30661000 |
| H | 1.28883300  | 7.47228700  | 1.73162500  |
| H | 2.44796400  | 7.75368100  | -2.38862200 |
| C | 5.35843400  | -0.75404900 | -0.40897600 |
| C | 5.97547000  | -0.72783400 | 0.85725100  |
| C | 6.10331700  | -1.05114800 | -1.56763700 |
| C | 7.34186600  | -1.01293300 | 0.94293000  |
| C | 7.46755800  | -1.32690400 | -1.43408700 |
| C | 8.10532400  | -1.31244900 | -0.18964300 |
| H | 7.82099700  | -1.00119500 | 1.91991700  |
| H | 8.04632400  | -1.55806900 | -2.32614100 |
| C | -0.50647600 | -5.05764200 | 1.39433300  |
| H | 0.14064800  | -4.18894400 | 1.52922900  |
| H | -1.50823100 | -4.77298400 | 1.74172700  |
| H | -0.14948400 | -5.84496600 | 2.06485100  |
| C | -0.31507800 | -4.15030600 | -3.60907600 |
| H | -1.14454800 | -3.43406200 | -3.64868600 |
| H | 0.59883600  | -3.55165400 | -3.52598100 |
| H | -0.28761800 | -4.68982800 | -4.56045500 |
| C | -1.12326200 | -8.83479200 | -1.89542500 |



|   |             |             |             |
|---|-------------|-------------|-------------|
| H | -0.87170400 | -9.46078300 | -1.03285600 |
| H | -2.18369100 | -9.00358900 | -2.12547700 |
| H | -0.54580400 | -9.19274700 | -2.75526700 |
| C | 5.18417700  | -0.38955400 | 2.10079800  |
| H | 4.82102500  | 0.64501300  | 2.07100100  |
| H | 4.30016900  | -1.02666600 | 2.20598800  |
| H | 5.79429100  | -0.50792500 | 3.00128200  |
| C | 5.44011500  | -1.07820800 | -2.92602900 |
| H | 4.72911400  | -1.90931300 | -3.00512200 |
| H | 4.86636200  | -0.16332200 | -3.11273500 |
| H | 6.18056300  | -1.18860400 | -3.72390800 |
| C | 9.58779700  | -1.58184800 | -0.07626300 |
| H | 10.16635000 | -0.65569800 | -0.19325200 |
| H | 9.84582800  | -2.00533600 | 0.90040100  |
| H | 9.92979100  | -2.27783700 | -0.84993300 |
| C | 0.72918600  | 4.81171400  | 1.80289300  |
| H | -0.27790900 | 4.41587800  | 1.62458000  |
| H | 1.36761800  | 3.94138900  | 1.99094000  |
| H | 0.69558400  | 5.41014400  | 2.71796200  |
| C | 2.15142100  | 9.26506200  | -0.14787500 |
| H | 1.53618400  | 9.84941100  | -0.84333300 |
| H | 1.92523000  | 9.60625000  | 0.86739400  |
| H | 3.19880300  | 9.51457800  | -0.35936900 |
| C | 2.11864700  | 5.13915400  | -3.06673700 |
| H | 2.92223000  | 4.39456100  | -3.01670500 |
| H | 1.22351000  | 4.60785400  | -3.41104400 |
| H | 2.38930500  | 5.88002200  | -3.82499000 |
| C | -4.70836500 | 2.10629900  | 0.41102600  |
| H | -3.86690700 | 1.52559800  | 0.79375700  |
| H | -4.39354700 | 3.15811500  | 0.41070100  |
| H | -5.53863600 | 2.00856300  | 1.11627200  |
| C | -3.60562000 | 0.16895000  | -4.17750600 |
| H | -2.62672800 | 0.65803700  | -4.13146200 |
| H | -3.42938600 | -0.89450300 | -3.97298200 |
| H | -3.98494800 | 0.25292500  | -5.20064000 |
| C | -8.28792800 | 1.74122700  | -3.11681300 |
| H | -8.98482400 | 1.62467200  | -2.27992400 |
| H | -8.41913900 | 2.75773100  | -3.51155600 |
| H | -8.58524500 | 1.04394500  | -3.90745700 |
| C | 0.28057000  | -1.84762000 | 3.20132400  |
| C | 1.55918000  | -1.97827500 | 2.63841300  |
| C | -0.16096700 | -2.82875000 | 4.10457000  |
| C | 2.37288300  | -3.06393000 | 2.96825700  |
| H | 1.89260900  | -1.23413500 | 1.92424300  |

|   |             |             |            |
|---|-------------|-------------|------------|
| C | 0.65795600  | -3.90590000 | 4.44321300 |
| H | -1.14924900 | -2.73753200 | 4.54633800 |
| C | 1.92802000  | -4.02891100 | 3.87408400 |
| H | 3.34690000  | -3.16495200 | 2.49826200 |
| H | 0.30107200  | -4.65202800 | 5.14853500 |
| H | 2.56134300  | -4.87483700 | 4.12764300 |
| N | -6.24724500 | -0.40136700 | 2.53801300 |
| O | -6.89165000 | -1.35694300 | 2.10140300 |
| O | -6.75249000 | 0.67629200  | 2.87339300 |

**cat2/b11**

|    |             |             |             |
|----|-------------|-------------|-------------|
| C  | 2.47744100  | 0.14847600  | -1.29793500 |
| C  | 3.50359300  | -0.76583400 | -1.74603200 |
| C  | 2.87143600  | -1.91420700 | -2.12409300 |
| C  | 1.47249500  | -1.73446400 | -1.82292700 |
| N  | 1.25884100  | -0.46801400 | -1.33927300 |
| H  | 4.55980500  | -0.54696400 | -1.77439700 |
| H  | 3.30302800  | -2.82044000 | -2.52529600 |
| C  | -2.51465300 | -1.81619000 | -0.26715400 |
| C  | -2.75107600 | -3.23155600 | -0.43542500 |
| C  | -1.68809200 | -3.72839700 | -1.13132700 |
| C  | -0.76812500 | -2.63264800 | -1.32004500 |
| N  | -1.29153200 | -1.48541500 | -0.78678600 |
| H  | -3.63122700 | -3.75381000 | -0.08918800 |
| H  | -1.51692600 | -4.74079300 | -1.46864200 |
| C  | -0.34539900 | 3.35488000  | -0.94377500 |
| C  | 0.60651400  | 4.44142200  | -1.01546000 |
| C  | 1.84518000  | 3.87700300  | -0.96497400 |
| C  | 1.64577100  | 2.44493600  | -0.92352400 |
| N  | 0.31260200  | 2.15765400  | -0.91560500 |
| H  | 0.34185400  | 5.48778500  | -1.07094500 |
| H  | 2.81189300  | 4.36023200  | -0.98471100 |
| C  | -2.59928300 | 2.47050500  | -0.46608200 |
| C  | -3.97767500 | 2.64559300  | -0.06718700 |
| C  | -4.43456100 | 1.41771600  | 0.30593700  |
| C  | -3.34920900 | 0.48732600  | 0.08457600  |
| N  | -2.25036700 | 1.15221000  | -0.37635500 |
| H  | -4.50013900 | 3.59164300  | -0.06011200 |
| H  | -5.41496100 | 1.14289400  | 0.66844400  |
| C  | 2.68770600  | 1.50556900  | -0.96681500 |
| C  | -3.46410300 | -0.90419800 | 0.22495600  |
| C  | 0.51204600  | -2.75142500 | -1.88495400 |
| C  | -1.72964100 | 3.52045600  | -0.79503800 |
| Fe | -0.47969600 | 0.33122700  | -0.79044800 |

|    |             |             |             |
|----|-------------|-------------|-------------|
| Cl | -1.05631600 | 0.51583200  | -3.08801800 |
| O  | -0.10625400 | 0.29850000  | 0.89054600  |
| H  | 0.30592400  | -0.81440900 | 1.31295000  |
| C  | 4.57367100  | -0.41015100 | 3.11046300  |
| C  | 3.45626900  | -0.27883300 | 3.94026100  |
| C  | 3.28655900  | -1.59526000 | 1.48332400  |
| C  | 4.50841500  | -1.07751700 | 1.88695000  |
| H  | 3.55324000  | 0.25544500  | 4.87840600  |
| H  | 5.39263700  | -1.15107100 | 1.26676200  |
| C  | 0.81624800  | -1.90309500 | 1.81508400  |
| C  | 2.13785400  | -1.44593800 | 2.27664400  |
| C  | 2.23235900  | -0.79010900 | 3.52528100  |
| C  | 0.96295500  | -0.58730800 | 4.32570700  |
| H  | 0.84230000  | -2.55259400 | 0.94154100  |
| H  | 1.19174300  | -0.43390100 | 5.38627800  |
| H  | 0.49356800  | 0.34424400  | 3.96840000  |
| H  | 3.20822700  | -2.09449900 | 0.52525700  |
| C  | -0.11521100 | -2.33355900 | 2.87691500  |
| C  | -1.06859400 | -3.34112000 | 2.66261100  |
| C  | -1.91886700 | -3.74288900 | 3.69065700  |
| C  | -1.82240000 | -3.14128600 | 4.94835800  |
| C  | -0.88114500 | -2.13103900 | 5.16697200  |
| C  | -0.03178100 | -1.71443500 | 4.14183200  |
| H  | -1.14151000 | -3.80191900 | 1.68232500  |
| H  | -2.65578000 | -4.52078700 | 3.51101000  |
| H  | -2.47830100 | -3.45433600 | 5.75621000  |
| H  | -0.80814900 | -1.66065100 | 6.14507800  |
| C  | 0.87190400  | -4.03072500 | -2.57155000 |
| C  | 0.70727700  | -4.09721000 | -3.97080300 |
| C  | 1.36132200  | -5.13686000 | -1.85095300 |
| C  | 1.02534200  | -5.29121600 | -4.62465600 |
| C  | 1.66990000  | -6.30950400 | -2.54844700 |
| C  | 1.50276900  | -6.40893900 | -3.93290900 |
| H  | 0.89852000  | -5.34758200 | -5.70399300 |
| H  | 2.05266200  | -7.16491900 | -1.99538500 |
| C  | 4.06294500  | 1.95449000  | -0.60177400 |
| C  | 4.29418000  | 2.24485800  | 0.76941600  |
| C  | 5.11908400  | 2.02559100  | -1.52844500 |
| C  | 5.59945500  | 2.49294500  | 1.18821300  |
| C  | 6.41475200  | 2.28169900  | -1.05707600 |
| C  | 6.68059900  | 2.48224000  | 0.29709500  |
| H  | 5.78812000  | 2.67201600  | 2.24431300  |
| H  | 7.23372900  | 2.31775900  | -1.77331500 |
| C  | -4.69724900 | -1.43953900 | 0.87844600  |

|   |             |             |             |
|---|-------------|-------------|-------------|
| C | -4.77363500 | -1.41083300 | 2.28651600  |
| C | -5.76642500 | -1.93896100 | 0.10817500  |
| C | -5.90564700 | -1.94989700 | 2.90492900  |
| C | -6.88318000 | -2.45791600 | 0.77164800  |
| C | -6.96462100 | -2.48856100 | 2.16739500  |
| H | -5.96350000 | -1.94001200 | 3.99159700  |
| H | -7.71337700 | -2.84097700 | 0.18154500  |
| C | -2.29760800 | 4.89737800  | -0.92112700 |
| C | -2.74589500 | 5.33073800  | -2.18438300 |
| C | -2.37739400 | 5.74002400  | 0.20343600  |
| C | -3.27588000 | 6.61937300  | -2.29774400 |
| C | -2.91505500 | 7.02119700  | 0.04316700  |
| C | -3.37176600 | 7.47764200  | -1.19722900 |
| H | -3.62087600 | 6.96143000  | -3.27153100 |
| H | -2.97722500 | 7.67790300  | 0.90865800  |
| C | 0.22085800  | -2.89538100 | -4.74843700 |
| H | -0.67910900 | -2.45212400 | -4.30858800 |
| H | 0.97267100  | -2.09676000 | -4.74975700 |
| H | 0.00621700  | -3.16039000 | -5.78816000 |
| C | 1.56626500  | -5.06475400 | -0.35495900 |
| H | 2.24176400  | -4.24527800 | -0.08333700 |
| H | 0.62280700  | -4.88690100 | 0.17424700  |
| H | 1.99590300  | -5.99382900 | 0.03107000  |
| C | 1.80655300  | -7.69726500 | -4.66157600 |
| H | 0.90161100  | -8.30944100 | -4.77332000 |
| H | 2.19444600  | -7.50647100 | -5.66823400 |
| H | 2.54407400  | -8.30068700 | -4.12167300 |
| C | 3.16645000  | 2.28927600  | 1.77759600  |
| H | 2.55394600  | 3.18816900  | 1.63783600  |
| H | 2.48947100  | 1.43408800  | 1.68776200  |
| H | 3.56456900  | 2.30915800  | 2.79508400  |
| C | 4.89915100  | 1.88036200  | -3.02078200 |
| H | 5.46831700  | 1.03890600  | -3.43431100 |
| H | 3.84763000  | 1.72817600  | -3.27505200 |
| H | 5.24187400  | 2.78336100  | -3.54043000 |
| C | 8.08263600  | 2.67539300  | 0.82055100  |
| H | 8.20381400  | 3.66489200  | 1.27931100  |
| H | 8.29748600  | 1.93011600  | 1.59590200  |
| H | 8.83029600  | 2.57736700  | 0.02688600  |
| C | -1.88715700 | 5.26899200  | 1.55378100  |
| H | -2.41188700 | 4.36014900  | 1.87180200  |
| H | -0.81906000 | 5.02149800  | 1.52469900  |
| H | -2.03809900 | 6.03577900  | 2.31954500  |
| C | -2.64937800 | 4.41834200  | -3.38559700 |

|   |             |             |             |
|---|-------------|-------------|-------------|
| H | -1.61489000 | 4.10799100  | -3.57273600 |
| H | -3.21653700 | 3.49264600  | -3.23347600 |
| H | -3.02919200 | 4.90958100  | -4.28650900 |
| C | -3.97964000 | 8.85354800  | -1.34237400 |
| H | -5.07297700 | 8.81378100  | -1.24625800 |
| H | -3.60934900 | 9.54015400  | -0.57357000 |
| H | -3.75653900 | 9.28865600  | -2.32275300 |
| C | -5.73042700 | -1.88558200 | -1.40335400 |
| H | -5.44857000 | -0.88755300 | -1.75828900 |
| H | -4.99459900 | -2.58301300 | -1.81981100 |
| H | -6.70780600 | -2.13534000 | -1.82724500 |
| C | -3.68247600 | -0.76789700 | 3.11191100  |
| H | -2.68408600 | -1.07903600 | 2.79291400  |
| H | -3.72091200 | 0.32459800  | 3.01416900  |
| H | -3.78858000 | -1.01951100 | 4.17004100  |
| C | -8.16019100 | -3.09825300 | 2.86148700  |
| H | -9.06021300 | -3.03772400 | 2.24017000  |
| H | -7.98777900 | -4.16011600 | 3.08302800  |
| H | -8.37012700 | -2.59865000 | 3.81364300  |
| N | 5.82355300  | 0.24036700  | 3.49014800  |
| O | 6.83969200  | -0.02906800 | 2.84437500  |
| O | 5.79016800  | 1.05683200  | 4.41720500  |

**cat2+b12**

|   |             |             |             |
|---|-------------|-------------|-------------|
| C | 2.44895800  | 0.31443100  | -1.33662800 |
| C | 3.52142900  | -0.52402700 | -1.82282100 |
| C | 2.95566300  | -1.70311900 | -2.21266800 |
| C | 1.55335000  | -1.61713900 | -1.88619800 |
| N | 1.27052500  | -0.37333300 | -1.37553500 |
| H | 4.56104800  | -0.23807400 | -1.86678800 |
| H | 3.43658700  | -2.57204400 | -2.63932900 |
| C | -2.42140200 | -1.94650900 | -0.32348000 |
| C | -2.56110300 | -3.37667200 | -0.47794800 |
| C | -1.46878600 | -3.80684900 | -1.17377300 |
| C | -0.62661900 | -2.65294300 | -1.37715900 |
| N | -1.22377700 | -1.54038100 | -0.85071300 |
| H | -3.40054800 | -3.95671400 | -0.12271300 |
| H | -1.23008700 | -4.80860800 | -1.50185600 |
| C | -0.54305400 | 3.34635000  | -0.90843800 |
| C | 0.34835900  | 4.48569500  | -0.92768300 |
| C | 1.61511900  | 3.98884200  | -0.87396900 |
| C | 1.49444800  | 2.54713400  | -0.88441500 |
| N | 0.17810700  | 2.18724300  | -0.90472900 |
| H | 0.02720200  | 5.51726400  | -0.95354600 |

|    |             |             |             |
|----|-------------|-------------|-------------|
| H  | 2.55344900  | 4.52530100  | -0.86236300 |
| C  | -2.75274700 | 2.33086800  | -0.49780200 |
| C  | -4.14642800 | 2.42022700  | -0.12333700 |
| C  | -4.53460800 | 1.16509900  | 0.23550500  |
| C  | -3.39180100 | 0.30268100  | 0.02590100  |
| N  | -2.32883800 | 1.03332300  | -0.41489500 |
| H  | -4.72389000 | 3.33371600  | -0.11901600 |
| H  | -5.50200800 | 0.82978200  | 0.58174900  |
| C  | 2.58513400  | 1.67005100  | -0.95692500 |
| C  | -3.42193200 | -1.09306400 | 0.17228200  |
| C  | 0.65776700  | -2.69088600 | -1.94600200 |
| C  | -1.93803000 | 3.43325700  | -0.78747400 |
| Fe | -0.51188300 | 0.31643200  | -0.82077800 |
| Cl | -1.07725700 | 0.51045400  | -3.12229800 |
| O  | -0.15319300 | 0.26778700  | 0.86017200  |
| H  | 0.33204100  | -0.82992100 | 1.29309900  |
| C  | 4.57948900  | -0.26621600 | 3.08585900  |
| C  | 3.50302600  | -0.31238900 | 3.97185600  |
| C  | 3.32361400  | -1.39899800 | 1.39751800  |
| C  | 4.51781800  | -0.82427400 | 1.80757400  |
| H  | 3.57419100  | 0.11957600  | 4.96149600  |
| H  | 5.37532500  | -0.75950500 | 1.15080800  |
| C  | 0.87938400  | -1.89471800 | 1.78865600  |
| C  | 2.19858300  | -1.43050400 | 2.23472000  |
| C  | 2.32543100  | -0.91020500 | 3.53962900  |
| H  | 0.89127600  | -2.54549700 | 0.91525600  |
| H  | 3.24017900  | -1.80334600 | 0.39701800  |
| C  | 0.00800000  | -2.33829300 | 2.89030900  |
| C  | -1.05796000 | -3.23515700 | 2.72213100  |
| C  | -1.87796600 | -3.58273500 | 3.79206100  |
| C  | -1.64658400 | -3.02966600 | 5.05722400  |
| C  | -0.58611900 | -2.14531800 | 5.25442700  |
| C  | 0.23178900  | -1.81523400 | 4.17614800  |
| H  | -1.24021800 | -3.64534000 | 1.73406200  |
| H  | -2.70799600 | -4.26568500 | 3.63794400  |
| H  | -2.28754700 | -3.29175300 | 5.89423500  |
| H  | -0.37129900 | -1.71589800 | 6.22752000  |
| C  | 1.09601800  | -3.94562400 | -2.63285500 |
| C  | 0.91004300  | -4.03431700 | -4.02812200 |
| C  | 1.68073800  | -5.00685900 | -1.91604700 |
| C  | 1.31275700  | -5.20178400 | -4.68309500 |
| C  | 2.06994300  | -6.15507700 | -2.61401400 |
| C  | 1.89070400  | -6.27369100 | -3.99537200 |
| H  | 1.17203800  | -5.27402400 | -5.75973900 |

|   |             |             |             |
|---|-------------|-------------|-------------|
| H | 2.52660300  | -6.97539200 | -2.06387800 |
| C | 3.93106300  | 2.18190000  | -0.56607300 |
| C | 4.13708200  | 2.43463900  | 0.81695600  |
| C | 4.98462700  | 2.35406200  | -1.48220300 |
| C | 5.42055600  | 2.75725100  | 1.25214700  |
| C | 6.25818700  | 2.67921600  | -0.99342000 |
| C | 6.50345700  | 2.85307500  | 0.36829600  |
| H | 5.59187100  | 2.91333300  | 2.31491300  |
| H | 7.07617500  | 2.79466300  | -1.70233600 |
| C | -4.60152500 | -1.69551100 | 0.86313800  |
| C | -4.66487400 | -1.60321700 | 2.27004100  |
| C | -5.63415000 | -2.32133200 | 0.13514600  |
| C | -5.73087900 | -2.22135700 | 2.93164600  |
| C | -6.68777500 | -2.91081600 | 0.84064900  |
| C | -6.74344900 | -2.89091200 | 2.23827200  |
| H | -5.77607700 | -2.16531000 | 4.01756800  |
| H | -7.49020400 | -3.38988500 | 0.28306000  |
| C | -2.57684000 | 4.78026400  | -0.89532800 |
| C | -2.98992400 | 5.23390100  | -2.16323700 |
| C | -2.75342600 | 5.57711500  | 0.25161500  |
| C | -3.58559400 | 6.49523700  | -2.25865400 |
| C | -3.35265700 | 6.83258300  | 0.10848500  |
| C | -3.77836300 | 7.30726500  | -1.13620900 |
| H | -3.90524600 | 6.85246700  | -3.23562200 |
| H | -3.48879500 | 7.45438200  | 0.99110600  |
| C | 0.30050000  | -2.88469300 | -4.79719300 |
| H | -0.66129200 | -2.57430400 | -4.37424700 |
| H | 0.94015800  | -1.99522800 | -4.75830500 |
| H | 0.14819700  | -3.15037700 | -5.84761100 |
| C | 1.89560600  | -4.91459700 | -0.42249800 |
| H | 2.51636600  | -4.05019100 | -0.15955600 |
| H | 0.94600800  | -4.80080400 | 0.11394200  |
| H | 2.39130800  | -5.81074700 | -0.03771800 |
| C | 2.28578800  | -7.53686300 | -4.72434700 |
| H | 1.43196500  | -8.22131400 | -4.81720900 |
| H | 2.63896000  | -7.32054300 | -5.73858100 |
| H | 3.07959600  | -8.07525300 | -4.19556400 |
| C | 3.00603500  | 2.36011400  | 1.81994500  |
| H | 2.33436200  | 3.22085100  | 1.71701100  |
| H | 2.38683900  | 1.46755200  | 1.68788500  |
| H | 3.39775300  | 2.36181900  | 2.84013100  |
| C | 4.78095700  | 2.25193100  | -2.98029000 |
| H | 5.42971700  | 1.48792900  | -3.42572100 |
| H | 3.74932400  | 2.01092400  | -3.24644700 |

|   |             |             |             |
|---|-------------|-------------|-------------|
| H | 5.03554200  | 3.20515300  | -3.45955400 |
| C | 7.88605000  | 3.12894200  | 0.90616500  |
| H | 7.93560600  | 4.11212500  | 1.39114600  |
| H | 8.14909400  | 2.38025000  | 1.66297600  |
| H | 8.64249300  | 3.10473900  | 0.11514500  |
| C | -2.29898100 | 5.08571400  | 1.60726500  |
| H | -2.80920600 | 4.15539700  | 1.88438800  |
| H | -1.22429200 | 4.86739200  | 1.61174100  |
| H | -2.49882500 | 5.82858300  | 2.38528700  |
| C | -2.78472600 | 4.37331800  | -3.38872200 |
| H | -1.72232000 | 4.15963600  | -3.55467200 |
| H | -3.27298000 | 3.39771000  | -3.28283900 |
| H | -3.18031500 | 4.86093800  | -4.28480800 |
| C | -4.45527200 | 8.65244400  | -1.26260900 |
| H | -5.54662300 | 8.55312100  | -1.18937500 |
| H | -4.13691500 | 9.33882900  | -0.47059800 |
| H | -4.23681500 | 9.12228000  | -2.22783000 |
| C | -5.63601700 | -2.31990400 | -1.37829600 |
| H | -5.39730700 | -1.32613800 | -1.77380300 |
| H | -4.88942300 | -3.00695400 | -1.79231200 |
| H | -6.61507400 | -2.61613100 | -1.76706000 |
| C | -3.64849800 | -0.80139100 | 3.05302900  |
| H | -2.63135800 | -0.92431300 | 2.67243300  |
| H | -3.88216900 | 0.26941300  | 2.99027000  |
| H | -3.64921900 | -1.08793800 | 4.10768600  |
| C | -7.86656200 | -3.57991000 | 2.97766500  |
| H | -8.79441100 | -3.57308100 | 2.39529600  |
| H | -7.61859700 | -4.63042100 | 3.18107900  |
| H | -8.06692800 | -3.10055900 | 3.94198600  |
| N | 5.79077800  | 0.44744400  | 3.48336700  |
| O | 6.80363400  | 0.29563400  | 2.79637000  |
| O | 5.72322000  | 1.19052300  | 4.46688600  |
| O | 1.28440600  | -0.95817900 | 4.43255100  |

**cat2/b13**

|   |             |             |             |
|---|-------------|-------------|-------------|
| C | -0.82083500 | -2.96401300 | -0.81237900 |
| C | -1.60827800 | -4.08687400 | -0.36313900 |
| C | -2.64032700 | -3.57390300 | 0.36541300  |
| C | -2.51315600 | -2.13534600 | 0.31135200  |
| N | -1.37933000 | -1.79284700 | -0.38158900 |
| H | -1.37844200 | -5.12197300 | -0.57292000 |
| H | -3.44056400 | -4.10184900 | 0.86433300  |
| C | -2.94606300 | 2.09717100  | -0.31286400 |
| C | -4.28294700 | 2.22595700  | 0.22183700  |



|    |             |             |             |
|----|-------------|-------------|-------------|
| C  | -4.61122100 | 1.01360600  | 0.74710300  |
| C  | -3.48994000 | 0.13464500  | 0.49254900  |
| N  | -2.49258600 | 0.81750100  | -0.14157200 |
| H  | -4.86698500 | 3.13503800  | 0.20321400  |
| H  | -5.52686900 | 0.71698600  | 1.23832200  |
| C  | 2.13818900  | 0.00784800  | -1.61376000 |
| C  | 3.18029500  | -0.88657800 | -2.06749700 |
| C  | 2.61387900  | -2.12091900 | -2.19089900 |
| C  | 1.25130400  | -1.99800500 | -1.73194800 |
| N  | 0.98568700  | -0.69196200 | -1.39887200 |
| H  | 4.19923400  | -0.59303400 | -2.27254200 |
| H  | 3.07150100  | -3.04314900 | -2.51988100 |
| C  | 1.18971800  | 2.28052500  | -1.37956000 |
| C  | 1.27656500  | 3.71255200  | -1.56259400 |
| C  | 0.00600800  | 4.19410500  | -1.47184900 |
| C  | -0.84415500 | 3.06128900  | -1.17726100 |
| N  | -0.10672500 | 1.91404000  | -1.14987800 |
| H  | 2.19325500  | 4.25006800  | -1.76048100 |
| H  | -0.33935300 | 5.21388700  | -1.56478000 |
| C  | 0.38424100  | -3.07609000 | -1.52679000 |
| C  | -2.20518100 | 3.15805600  | -0.84945100 |
| C  | -3.49228700 | -1.24259600 | 0.77031300  |
| C  | 2.27683900  | 1.40744000  | -1.50250300 |
| Fe | -0.73025900 | 0.06259700  | -0.72313100 |
| Cl | -1.61463700 | -0.08111000 | -2.91460100 |
| O  | -0.12374100 | 0.27693900  | 0.88588500  |
| C  | 2.83872700  | 0.93453900  | 5.93255600  |
| C  | 3.95167300  | 0.84736800  | 5.12413000  |
| C  | 3.88057000  | 0.17117800  | 3.87740700  |
| C  | 2.62265000  | -0.40878000 | 3.48169300  |
| C  | 1.48545800  | -0.29981600 | 4.34009500  |
| C  | 1.61270900  | 0.35901300  | 5.54776800  |
| C  | 4.96208600  | 0.07091900  | 2.93943000  |
| C  | 2.50202300  | -1.08793000 | 2.21926900  |
| C  | 3.60200000  | -1.15244800 | 1.36776300  |
| C  | 4.81666200  | -0.55830500 | 1.71531900  |
| C  | 1.21844700  | -1.65781800 | 1.82037800  |
| C  | 0.29066900  | -2.04681900 | 2.95280500  |
| C  | 0.14359200  | -0.85651300 | 3.90694400  |
| H  | -0.41015200 | -0.06983700 | 3.37598600  |
| H  | -0.68224200 | -2.34534600 | 2.55038000  |
| H  | 2.91147700  | 1.45352800  | 6.88459800  |
| H  | 4.88590200  | 1.28771600  | 5.43864400  |
| H  | 0.75027900  | 0.43991500  | 6.20525600  |

|   |             |             |             |
|---|-------------|-------------|-------------|
| H | 5.65750200  | -0.57976400 | 1.03341800  |
| H | 3.50892300  | -1.65429800 | 0.41143200  |
| H | 0.58397200  | -0.66155300 | 1.26166500  |
| H | 1.28056500  | -2.36880800 | 0.99930800  |
| N | 6.28049200  | 0.65424600  | 3.19583600  |
| O | 6.67938200  | 0.75109800  | 4.35966300  |
| O | 6.94843500  | 1.00680400  | 2.21579600  |
| C | -4.67817300 | -1.80029400 | 1.49433700  |
| C | -5.76801300 | -2.31109900 | 0.76113800  |
| C | -4.70604100 | -1.78027700 | 2.90211600  |
| C | -6.87083700 | -2.81099600 | 1.46120500  |
| C | -5.82857300 | -2.29139500 | 3.56027800  |
| C | -6.91866600 | -2.81570200 | 2.85866500  |
| H | -7.71666100 | -3.20096600 | 0.89856300  |
| H | -5.85305100 | -2.27570300 | 4.64812200  |
| C | -2.88003200 | 4.48092100  | -1.02187400 |
| C | -3.47378300 | 4.78141000  | -2.26311300 |
| C | -2.91940500 | 5.40288600  | 0.04142600  |
| C | -4.10815600 | 6.01809800  | -2.41704800 |
| C | -3.56337200 | 6.62783800  | -0.15826200 |
| C | -4.16107400 | 6.95471400  | -1.37990900 |
| H | -4.57336800 | 6.25414300  | -3.37205800 |
| H | -3.59942000 | 7.34329400  | 0.66097600  |
| C | 3.65642000  | 1.97832000  | -1.49645100 |
| C | 4.42012300  | 2.08464500  | -2.67503600 |
| C | 4.19621500  | 2.36552500  | -0.24860600 |
| C | 5.75322900  | 2.49831000  | -2.57213300 |
| C | 5.53773600  | 2.74899700  | -0.19282800 |
| C | 6.33736700  | 2.80451700  | -1.33945700 |
| H | 6.35016800  | 2.57703900  | -3.47864800 |
| H | 5.97631300  | 2.98578500  | 0.77252700  |
| C | 0.76405700  | -4.41486500 | -2.07590000 |
| C | 0.31046000  | -4.75216200 | -3.36832100 |
| C | 1.54393200  | -5.31720200 | -1.32864800 |
| C | 0.66082100  | -5.99860300 | -3.89505100 |
| C | 1.86908900  | -6.55389100 | -1.89624600 |
| C | 1.44184400  | -6.91116500 | -3.17826400 |
| H | 0.31196600  | -6.26369900 | -4.89115400 |
| H | 2.47019400  | -7.25483100 | -1.32055400 |
| C | 2.01854100  | -4.96831400 | 0.06343900  |
| H | 2.66552900  | -4.08310000 | 0.05676600  |
| H | 1.17567000  | -4.74221000 | 0.72739400  |
| H | 2.58481200  | -5.79273100 | 0.50685300  |
| C | -0.54874800 | -3.79080700 | -4.15723700 |

|   |             |             |             |
|---|-------------|-------------|-------------|
| H | -1.50386600 | -3.60343500 | -3.65259700 |
| H | -0.07330800 | -2.80952600 | -4.26334800 |
| H | -0.76125200 | -4.18184100 | -5.15673800 |
| C | 1.83295300  | -8.23772000 | -3.78684300 |
| H | 2.71819500  | -8.13123300 | -4.42797000 |
| H | 2.07434400  | -8.97837500 | -3.01704000 |
| H | 1.02938100  | -8.64493600 | -4.41048900 |
| C | -3.54344900 | -1.21838800 | 3.68763100  |
| H | -2.63376800 | -1.80664700 | 3.52366500  |
| H | -3.31002100 | -0.19202000 | 3.38196800  |
| H | -3.75464000 | -1.21601900 | 4.76130600  |
| C | -5.75182600 | -2.31050700 | -0.75066700 |
| H | -5.52154400 | -1.31543800 | -1.14837300 |
| H | -4.98255800 | -2.98708600 | -1.14172100 |
| H | -6.71811000 | -2.62622800 | -1.15514100 |
| C | -8.10670900 | -3.39267600 | 3.59257100  |
| H | -7.95211900 | -4.45654600 | 3.81718300  |
| H | -8.27686900 | -2.88131400 | 4.54636400  |
| H | -9.02288600 | -3.31570900 | 2.99731700  |
| C | -2.27735900 | 5.07250100  | 1.36962100  |
| H | -2.72309000 | 4.17527700  | 1.81576000  |
| H | -1.20655700 | 4.86611100  | 1.25261600  |
| H | -2.38901500 | 5.89735200  | 2.07974600  |
| C | -3.42408000 | 3.78456100  | -3.39818100 |
| H | -2.39117200 | 3.57204900  | -3.69820000 |
| H | -3.85694100 | 2.82035900  | -3.10809200 |
| H | -3.96500500 | 4.15563400  | -4.27389700 |
| C | -4.82174900 | 8.29852900  | -1.58285000 |
| H | -4.09998100 | 9.04114400  | -1.94861800 |
| H | -5.63037800 | 8.24118700  | -2.31947300 |
| H | -5.24036700 | 8.68587000  | -0.64754700 |
| C | 3.34410700  | 2.40545600  | 1.00048100  |
| H | 2.66077400  | 3.26361000  | 0.96972300  |
| H | 2.71886300  | 1.51601200  | 1.11452100  |
| H | 3.96568900  | 2.50286200  | 1.89366700  |
| C | 3.81102600  | 1.79340300  | -4.02992800 |
| H | 3.62855200  | 0.72357900  | -4.18349500 |
| H | 2.84247400  | 2.29402900  | -4.14304700 |
| H | 4.46780700  | 2.13847000  | -4.83435000 |
| C | 7.78716700  | 3.21480200  | -1.23399200 |
| H | 8.27179000  | 2.71884900  | -0.38539600 |
| H | 8.34502900  | 2.96508300  | -2.14257100 |
| H | 7.88238000  | 4.29689700  | -1.07379500 |
| H | 0.70528000  | -2.91499400 | 3.48903600  |

|                 |             |             |             |
|-----------------|-------------|-------------|-------------|
| H               | -0.44679600 | -1.12878300 | 4.78952300  |
| <b>cat2/b14</b> |             |             |             |
| C               | -0.46745300 | -2.83132800 | -1.23743400 |
| C               | -1.29853400 | -4.00223800 | -1.10532900 |
| C               | -2.50939900 | -3.57233800 | -0.65236000 |
| C               | -2.42481300 | -2.13571800 | -0.54028300 |
| N               | -1.16953800 | -1.70918200 | -0.89332200 |
| H               | -0.97450800 | -5.01179400 | -1.31273200 |
| H               | -3.39055200 | -4.15485000 | -0.42392200 |
| C               | -2.87241700 | 2.13086000  | -0.69952700 |
| C               | -4.26598300 | 2.19010500  | -0.31777500 |
| C               | -4.64259200 | 0.91630800  | -0.02494800 |
| C               | -3.48438500 | 0.08080300  | -0.25556100 |
| N               | -2.42152900 | 0.84213700  | -0.65441300 |
| H               | -4.85502200 | 3.09531300  | -0.28106500 |
| H               | -5.60828700 | 0.55370300  | 0.29640100  |
| C               | 2.45109600  | 0.31715900  | -1.41341300 |
| C               | 3.60485500  | -0.51953000 | -1.65707300 |
| C               | 3.14266200  | -1.78877900 | -1.82506300 |
| C               | 1.71647600  | -1.74193400 | -1.61289800 |
| N               | 1.31942600  | -0.45047700 | -1.36507200 |
| H               | 4.62455200  | -0.17035900 | -1.70587700 |
| H               | 3.70303700  | -2.68523100 | -2.04746900 |
| C               | 1.34638200  | 2.52901400  | -1.35802400 |
| C               | 1.37709300  | 3.96251300  | -1.54219400 |
| C               | 0.08496500  | 4.38677800  | -1.50857300 |
| C               | -0.72770600 | 3.21349600  | -1.27687000 |
| N               | 0.05880600  | 2.09549900  | -1.22327500 |
| H               | 2.27847700  | 4.54107200  | -1.68640700 |
| H               | -0.30095000 | 5.39071600  | -1.61255900 |
| C               | 0.88519900  | -2.86669500 | -1.60851300 |
| C               | -2.10530600 | 3.25395800  | -1.03269200 |
| C               | -3.49953200 | -1.31689600 | -0.16634000 |
| C               | 2.49298000  | 1.72389100  | -1.32954700 |
| Fe              | -0.53269800 | 0.18602200  | -0.96227200 |
| Cl              | -1.01094500 | 0.15680800  | -3.28452000 |
| O               | -0.28308600 | 0.35851400  | 0.73353200  |
| H               | 0.32442300  | -0.32349400 | 1.55512700  |
| C               | 4.10044100  | 0.98788000  | 3.63427000  |
| C               | 4.88105000  | 0.55217900  | 2.56354700  |
| C               | 4.37204000  | -0.32295900 | 1.60165600  |
| C               | 3.05048400  | -0.72876900 | 1.69935100  |
| C               | 2.21555800  | -0.27372800 | 2.74042100  |

|   |             |             |             |
|---|-------------|-------------|-------------|
| C | 2.77474900  | 0.57249700  | 3.71672000  |
| H | 4.52949600  | 1.65603400  | 4.37109500  |
| H | 4.99864600  | -0.64106500 | 0.77951400  |
| H | 2.63637300  | -1.38515900 | 0.94306000  |
| H | 2.15865000  | 0.91689100  | 4.53981700  |
| C | 0.78979200  | -0.72410000 | 2.76416900  |
| C | -0.17115600 | 0.06699600  | 3.60289100  |
| C | -0.28399700 | 1.45956700  | 3.40300000  |
| C | -1.02284900 | -0.53682400 | 4.54314300  |
| C | -1.21187500 | 2.21274300  | 4.11631200  |
| C | -1.95328100 | 0.21989000  | 5.25723000  |
| H | -0.95533200 | -1.60520400 | 4.71732200  |
| C | -2.05564600 | 1.59591900  | 5.04567300  |
| H | -1.28525400 | 3.28230300  | 3.93732600  |
| H | -2.59799800 | -0.27009500 | 5.98239300  |
| H | -2.78472700 | 2.18283200  | 5.59797100  |
| C | -4.76871600 | -1.97302100 | 0.28110600  |
| C | -5.70624000 | -2.39682500 | -0.68416200 |
| C | -5.02359800 | -2.14447600 | 1.65527500  |
| C | -6.88653500 | -3.00625700 | -0.25122000 |
| C | -6.22213700 | -2.75668800 | 2.04139800  |
| C | -7.16348100 | -3.19539100 | 1.10736900  |
| H | -7.61104000 | -3.33598700 | -0.99330800 |
| H | -6.42283600 | -2.89159400 | 3.10253900  |
| C | 1.46720300  | -4.18144900 | -2.02121200 |
| C | 2.23027600  | -4.94373600 | -1.11590200 |
| C | 1.24067000  | -4.63587000 | -3.33699200 |
| C | 2.75797100  | -6.16510600 | -1.54792900 |
| C | 1.79330000  | -5.85973900 | -3.72523400 |
| C | 2.55074100  | -6.64072500 | -2.84592200 |
| H | 3.34633100  | -6.75821400 | -0.85038700 |
| H | 1.62852100  | -6.21084700 | -4.74200200 |
| C | -2.78640600 | 4.58437000  | -1.06270900 |
| C | -3.39623300 | 5.02243300  | -2.25292500 |
| C | -2.81812600 | 5.37621100  | 0.10172900  |
| C | -4.03150900 | 6.26837500  | -2.25858100 |
| C | -3.46710100 | 6.61333100  | 0.05139800  |
| C | -4.07543600 | 7.07850300  | -1.11955200 |
| H | -4.50517100 | 6.61250800  | -3.17579200 |
| H | -3.49916500 | 7.22846100  | 0.94860400  |
| C | 3.82082800  | 2.38110700  | -1.14484500 |
| C | 4.10413100  | 2.93052500  | 0.13222700  |
| C | 4.80558800  | 2.38603000  | -2.15087000 |
| C | 5.40256900  | 3.35614600  | 0.40370200  |

|   |             |             |             |
|---|-------------|-------------|-------------|
| C | 6.09663700  | 2.82600700  | -1.82876500 |
| C | 6.42693900  | 3.26666900  | -0.54690600 |
| H | 5.63906900  | 3.72050000  | 1.40048200  |
| H | 6.86423700  | 2.80436700  | -2.60013200 |
| C | 3.04238200  | 3.04860800  | 1.20265700  |
| H | 2.32794500  | 3.84521000  | 0.96414000  |
| H | 2.46514400  | 2.12599100  | 1.30961700  |
| H | 3.49470000  | 3.28019900  | 2.16956200  |
| C | 4.50876200  | 1.94424500  | -3.56967700 |
| H | 4.94291600  | 0.96183400  | -3.79182300 |
| H | 3.43515600  | 1.87722700  | -3.76485600 |
| H | 4.93929300  | 2.65518500  | -4.28391900 |
| C | 7.84321100  | 3.60507700  | -0.15405100 |
| H | 8.19397100  | 2.88147400  | 0.59259700  |
| H | 8.52335200  | 3.57383800  | -1.01122000 |
| H | 7.90879900  | 4.60103400  | 0.30036300  |
| C | -2.16798300 | 4.89089800  | 1.37819300  |
| H | -2.58421600 | 3.92876000  | 1.70014000  |
| H | -1.09129000 | 4.73381400  | 1.23899800  |
| H | -2.30520900 | 5.61187800  | 2.19010900  |
| C | -3.37165900 | 4.15439800  | -3.49015000 |
| H | -2.34842000 | 3.87450300  | -3.76585200 |
| H | -3.91177100 | 3.21423700  | -3.32514500 |
| H | -3.82982600 | 4.66566000  | -4.34212700 |
| C | -4.73925800 | 8.43552500  | -1.15896100 |
| H | -4.01732100 | 9.22028100  | -1.42203600 |
| H | -5.54131600 | 8.46877800  | -1.90415700 |
| H | -5.16749100 | 8.70152700  | -0.18632100 |
| C | -4.02714600 | -1.70817700 | 2.70638900  |
| H | -3.23424500 | -2.45459300 | 2.83666900  |
| H | -3.53330100 | -0.76603600 | 2.45106300  |
| H | -4.51352200 | -1.57858100 | 3.67829400  |
| C | -5.44231300 | -2.18938700 | -2.15840500 |
| H | -5.24771200 | -1.13416000 | -2.38312400 |
| H | -4.55767400 | -2.74530600 | -2.49043600 |
| H | -6.29496500 | -2.51563900 | -2.76138200 |
| C | -8.46428900 | -3.82471000 | 1.54931500  |
| H | -8.37755200 | -4.26914400 | 2.54647200  |
| H | -9.26911200 | -3.07868800 | 1.59198500  |
| H | -8.78681300 | -4.60836200 | 0.85471500  |
| C | 0.41484200  | -3.82049700 | -4.30629300 |
| H | -0.64280300 | -3.81275200 | -4.01591600 |
| H | 0.72917400  | -2.77135800 | -4.33115600 |
| H | 0.48395600  | -4.22672600 | -5.31994300 |

|   |             |             |             |
|---|-------------|-------------|-------------|
| C | 2.49343600  | -4.45245500 | 0.28836200  |
| H | 3.27663200  | -3.68368500 | 0.29975100  |
| H | 1.60310900  | -4.00592100 | 0.73780000  |
| H | 2.82193600  | -5.26793900 | 0.93870900  |
| C | 3.10485000  | -7.97788200 | -3.27977300 |
| H | 4.01908800  | -8.23116000 | -2.73210800 |
| H | 2.38110000  | -8.78331700 | -3.09586200 |
| H | 3.33616500  | -7.98805700 | -4.35046800 |
| C | 0.61954300  | -2.21749200 | 2.81891100  |
| C | -0.51213800 | -2.81567300 | 2.24458200  |
| C | 1.52993800  | -3.03652200 | 3.50765400  |
| C | -0.73907800 | -4.18577800 | 2.36562900  |
| H | -1.20766000 | -2.18991300 | 1.69976500  |
| C | 1.30280500  | -4.40806500 | 3.63293900  |
| H | 2.41167500  | -2.59284400 | 3.95992500  |
| C | 0.16663800  | -4.98821800 | 3.06503500  |
| H | -1.61575700 | -4.62358200 | 1.89885400  |
| H | 2.01525800  | -5.02245900 | 4.17732100  |
| H | -0.00718700 | -6.05677800 | 3.15827500  |
| H | 0.33982300  | 1.93715500  | 2.65577000  |
| N | 6.24082600  | 1.06647900  | 2.40720200  |
| O | 6.93821400  | 0.59655000  | 1.50562400  |
| O | 6.60970100  | 1.96542100  | 3.16887300  |

**cat2/b15**

|   |             |             |             |
|---|-------------|-------------|-------------|
| C | -2.82591600 | 2.24603100  | -0.01355100 |
| C | -4.11744200 | 2.50838200  | -0.60745700 |
| C | -4.84650300 | 1.36703900  | -0.47471700 |
| C | -3.98664800 | 0.39868000  | 0.16875500  |
| N | -2.76639200 | 0.94994900  | 0.42912000  |
| H | -4.41420900 | 3.45311900  | -1.03993600 |
| H | -5.86408400 | 1.17592700  | -0.78406400 |
| C | -1.62498600 | -2.96598700 | 1.33714900  |
| C | -2.66093000 | -3.97234900 | 1.25604600  |
| C | -3.82664600 | -3.31244800 | 1.01696800  |
| C | -3.49062300 | -1.90838400 | 0.90875700  |
| N | -2.15741100 | -1.72494100 | 1.15685300  |
| H | -2.49327000 | -5.03295900 | 1.38056700  |
| H | -4.82099300 | -3.71752700 | 0.89459300  |
| C | 0.96778700  | 2.00425800  | 2.00334800  |
| C | 1.21587800  | 3.42286500  | 2.07457200  |
| C | 0.22561200  | 4.02948700  | 1.36046200  |
| C | -0.64195600 | 2.97982600  | 0.88179900  |
| N | -0.17107300 | 1.75658000  | 1.27760700  |

|    |             |             |             |
|----|-------------|-------------|-------------|
| H  | 2.05507500  | 3.87434600  | 2.58388500  |
| H  | 0.07312600  | 5.08351500  | 1.17817100  |
| C  | 1.58747500  | -0.34478200 | 2.42787600  |
| C  | 2.54937500  | -1.36241100 | 2.77308400  |
| C  | 2.00589900  | -2.55535800 | 2.40351000  |
| C  | 0.67884400  | -2.27294100 | 1.90500400  |
| N  | 0.45776900  | -0.92268800 | 1.90904700  |
| H  | 3.51748400  | -1.17187800 | 3.21326400  |
| H  | 2.44830000  | -3.53740600 | 2.46935100  |
| C  | -1.84278200 | 3.21968300  | 0.19247900  |
| C  | -0.26788400 | -3.25342500 | 1.54991200  |
| C  | -4.36929500 | -0.92343500 | 0.44887100  |
| C  | 1.81442900  | 1.03096200  | 2.54891600  |
| Fe | -1.13444400 | 0.00431900  | 1.13159400  |
| Cl | -1.94414300 | 0.38983600  | 3.32324800  |
| O  | -0.72631300 | -0.41080400 | -0.47881300 |
| H  | 0.22829400  | -0.05966500 | -1.20122300 |
| C  | 1.01612400  | 0.04691500  | -2.25648000 |
| C  | 1.76792500  | -1.24502000 | -2.14830800 |
| C  | 1.79319300  | -2.21025100 | -3.17088600 |
| C  | 2.43475200  | -1.53768300 | -0.94237700 |
| C  | 2.43069600  | -3.43275700 | -2.99212000 |
| H  | 1.30494800  | -1.99795800 | -4.11505800 |
| C  | 3.07540200  | -2.75044600 | -0.74754600 |
| H  | 2.41592600  | -0.81054300 | -0.13901800 |
| C  | 3.04865800  | -3.70043100 | -1.77049600 |
| H  | 2.43986800  | -4.18429700 | -3.77194700 |
| H  | 3.55896100  | -2.98485800 | 0.19043900  |
| C  | -0.05528400 | 0.15214400  | -3.30444100 |
| C  | -1.07679400 | -0.81731600 | -3.37590300 |
| C  | -0.10975100 | 1.23912200  | -4.19238200 |
| C  | -2.10381400 | -0.70340200 | -4.30847700 |
| H  | -1.07057600 | -1.64212800 | -2.67276600 |
| C  | -1.14374400 | 1.35519700  | -5.12396800 |
| H  | 0.66674800  | 1.99701600  | -4.15198200 |
| C  | -2.14463600 | 0.38519900  | -5.18674800 |
| H  | -2.88174700 | -1.46161500 | -4.34391000 |
| H  | -1.16288200 | 2.20498500  | -5.80146600 |
| C  | 1.75639900  | 1.30890500  | -1.99690500 |
| C  | 3.05739700  | 1.60119500  | -2.25339800 |
| H  | 1.12899300  | 2.09857800  | -1.59277300 |
| C  | 3.94337200  | 0.66029700  | -2.99972500 |
| C  | 5.11130800  | 0.14784700  | -2.41522600 |
| C  | 3.62584100  | 0.28486200  | -4.31273600 |



|   |             |             |             |
|---|-------------|-------------|-------------|
| C | 5.92079400  | -0.74718000 | -3.11284200 |
| H | 5.36949300  | 0.44110300  | -1.40232200 |
| C | 4.44341000  | -0.59905500 | -5.01789400 |
| H | 2.72267700  | 0.67705800  | -4.77111100 |
| C | 5.58925700  | -1.12358500 | -4.41764800 |
| H | 6.80986500  | -1.15349300 | -2.63798600 |
| H | 4.18055000  | -0.88297900 | -6.03352000 |
| H | 6.22144000  | -1.82012400 | -4.96162400 |
| C | 3.63113000  | 2.91686800  | -1.87304000 |
| C | 4.73411400  | 3.45136300  | -2.56426900 |
| C | 3.08488000  | 3.67453300  | -0.82036900 |
| C | 5.25708100  | 4.69900300  | -2.22320200 |
| H | 5.17712200  | 2.88724800  | -3.37849300 |
| C | 3.60457400  | 4.91992900  | -0.48126900 |
| H | 2.26442400  | 3.27275200  | -0.24099700 |
| C | 4.69566100  | 5.44153100  | -1.18210600 |
| H | 6.10662700  | 5.09210200  | -2.77563700 |
| H | 3.16349300  | 5.47358200  | 0.34357500  |
| H | 5.10854000  | 6.41037500  | -0.91435800 |
| C | -5.78233700 | -1.31720300 | 0.16050200  |
| C | -6.76193800 | -1.13919400 | 1.15603800  |
| C | -6.11635500 | -1.85619400 | -1.09638700 |
| C | -8.07788900 | -1.51657500 | 0.87268900  |
| C | -7.44607700 | -2.21617400 | -1.33758800 |
| C | -8.44013700 | -2.05372900 | -0.36725900 |
| H | -8.83868800 | -1.38784400 | 1.64009200  |
| H | -7.71081400 | -2.63472700 | -2.30658900 |
| C | -2.13478300 | 4.62545600  | -0.23080700 |
| C | -1.57682600 | 5.13245100  | -1.41992100 |
| C | -2.95879000 | 5.43552100  | 0.57904000  |
| C | -1.87257800 | 6.44763200  | -1.79391100 |
| C | -3.21927900 | 6.74640200  | 0.17004800  |
| C | -2.68816800 | 7.27095600  | -1.01318700 |
| H | -1.45189100 | 6.83684200  | -2.71896500 |
| H | -3.85363700 | 7.37408900  | 0.79286000  |
| C | 3.03147400  | 1.48902400  | 3.28791100  |
| C | 4.28273300  | 1.54210300  | 2.64620700  |
| C | 2.89522300  | 1.87832000  | 4.63732200  |
| C | 5.39013500  | 1.99650400  | 3.37136300  |
| C | 4.02999400  | 2.31892000  | 5.32307700  |
| C | 5.28594300  | 2.38528200  | 4.70909000  |
| H | 6.35654900  | 2.04945700  | 2.87376500  |
| H | 3.92988500  | 2.62128500  | 6.36366600  |
| C | 0.22162600  | -4.63961100 | 1.29365800  |

|   |             |             |             |
|---|-------------|-------------|-------------|
| C | 0.29010700  | -5.05039000 | -0.06314400 |
| C | 0.71583800  | -5.47417400 | 2.31238900  |
| C | 0.95608400  | -6.23479700 | -0.36885900 |
| C | 1.37778600  | -6.65641700 | 1.95377300  |
| C | 1.55254500  | -7.02726000 | 0.62030600  |
| H | 1.06753600  | -6.52158500 | -1.41146200 |
| H | 1.78671100  | -7.28692900 | 2.74118700  |
| C | -3.54685000 | 4.90414800  | 1.86729000  |
| H | -4.31173000 | 4.14300400  | 1.67285700  |
| H | -2.78380000 | 4.42468800  | 2.49079300  |
| H | -4.00939700 | 5.70766900  | 2.44832700  |
| C | -0.66067000 | 4.28749900  | -2.27424700 |
| H | 0.33888500  | 4.22101200  | -1.82588500 |
| H | -1.03236500 | 3.26471600  | -2.39206000 |
| H | -0.54225800 | 4.71970200  | -3.27288800 |
| C | -2.96437800 | 8.70043400  | -1.41745100 |
| H | -2.25262800 | 9.38888200  | -0.94244800 |
| H | -2.87565400 | 8.83603600  | -2.50060000 |
| H | -3.96953500 | 9.01580500  | -1.11654200 |
| C | 4.45142200  | 1.09857300  | 1.21114200  |
| H | 4.59866100  | 0.01233700  | 1.14679100  |
| H | 3.57819900  | 1.33642700  | 0.59994800  |
| H | 5.31861400  | 1.58256300  | 0.75152300  |
| C | 1.54737000  | 1.83399700  | 5.32078400  |
| H | 0.86229800  | 2.57879400  | 4.89834500  |
| H | 1.05464700  | 0.86427500  | 5.18929500  |
| H | 1.64349200  | 2.03060600  | 6.39287300  |
| C | 6.50066700  | 2.84063600  | 5.48389800  |
| H | 6.95339100  | 2.00457400  | 6.03359800  |
| H | 7.27035000  | 3.25028400  | 4.82111500  |
| H | 6.24149900  | 3.60936400  | 6.22029300  |
| C | -0.31125400 | -4.22046700 | -1.17541700 |
| H | -1.40696700 | -4.26371000 | -1.15418300 |
| H | -0.03475200 | -3.16554100 | -1.09223700 |
| H | 0.02230600  | -4.58322600 | -2.15027200 |
| C | 0.55002400  | -5.13756400 | 3.78026000  |
| H | 1.51056400  | -4.89861300 | 4.25294100  |
| H | -0.11425000 | -4.28369100 | 3.93683700  |
| H | 0.13141000  | -5.99506100 | 4.31998400  |
| C | 2.39652100  | -8.21163100 | 0.22109200  |
| H | 1.85860900  | -8.87812600 | -0.46368800 |
| H | 3.29070500  | -7.85479000 | -0.30523000 |
| H | 2.71661200  | -8.79622700 | 1.08953000  |
| C | -5.05582200 | -2.04437300 | -2.15816500 |

|   |              |             |             |
|---|--------------|-------------|-------------|
| H | -4.52755600  | -1.10710500 | -2.36906300 |
| H | -4.29506200  | -2.76556100 | -1.83445600 |
| H | -5.49337800  | -2.40858100 | -3.09296500 |
| C | -6.39005000  | -0.54750600 | 2.49620200  |
| H | -5.58118500  | -1.11041200 | 2.97609200  |
| H | -6.02242100  | 0.47990100  | 2.38570400  |
| H | -7.24825600  | -0.53134500 | 3.17473400  |
| C | -9.87668900  | -2.42107600 | -0.65906600 |
| H | -10.44224200 | -1.54940600 | -1.01481200 |
| H | -9.94525500  | -3.19254400 | -1.43349000 |
| H | -10.38535100 | -2.79301400 | 0.23715900  |
| H | -2.95034400  | 0.47480900  | -5.91048700 |
| N | 3.62878500   | -5.01898300 | -1.52963800 |
| O | 4.20786300   | -5.21304000 | -0.45822100 |
| O | 3.48607700   | -5.88369500 | -2.40064100 |

**cat3/b1**

|   |             |             |             |
|---|-------------|-------------|-------------|
| C | -1.91927600 | 2.62308900  | 0.07039200  |
| C | -1.73377700 | 4.05137700  | -0.03983800 |
| C | -0.47218400 | 4.24803200  | -0.50654300 |
| C | 0.12727400  | 2.94315900  | -0.64193300 |
| N | -0.77488300 | 1.96964500  | -0.28843300 |
| H | -2.48586400 | 4.79761100  | 0.17040500  |
| H | 0.00801600  | 5.18630800  | -0.74181700 |
| C | 2.40749600  | -0.68834800 | -0.62951900 |
| C | 3.69565500  | -0.09262000 | -0.90877000 |
| C | 3.46674900  | 1.21402600  | -1.19765400 |
| C | 2.05399800  | 1.43903100  | -1.01687200 |
| N | 1.42515300  | 0.26854600  | -0.68993500 |
| H | 4.64953000  | -0.59437300 | -0.87749700 |
| H | 4.19516500  | 1.97130600  | -1.44741300 |
| C | -3.19114000 | -1.46147900 | -0.26943100 |
| C | -4.58532900 | -1.26090700 | 0.06144400  |
| C | -4.72047400 | 0.04478200  | 0.40740300  |
| C | -3.41942800 | 0.65396900  | 0.24059400  |
| N | -2.50751000 | -0.29015300 | -0.15930100 |
| H | -5.34489200 | -2.02887800 | 0.05994400  |
| H | -5.61615400 | 0.55293500  | 0.73165900  |
| C | -1.24934700 | -2.95645800 | -0.61307700 |
| C | -0.63861100 | -4.26483500 | -0.71395100 |
| C | 0.69795300  | -4.08189100 | -0.57125000 |
| C | 0.91022300  | -2.65455600 | -0.44552300 |
| N | -0.27867700 | -1.99510200 | -0.48001700 |
| H | -1.16757500 | -5.19433500 | -0.86189600 |

|    |             |             |             |
|----|-------------|-------------|-------------|
| H  | 1.47918200  | -4.82771300 | -0.59291600 |
| C  | -3.14437700 | 2.01373200  | 0.39711100  |
| C  | 2.18210200  | -2.05492800 | -0.41121800 |
| C  | 1.44966900  | 2.70303300  | -1.02331800 |
| C  | -2.62235900 | -2.71638100 | -0.55404200 |
| Fe | -0.52551400 | -0.00402800 | -0.35130400 |
| Cl | -0.86621800 | 0.02513500  | -2.67154700 |
| O  | -0.38655500 | -0.16290400 | 1.36087300  |
| H  | 0.16509500  | 0.74458700  | 1.91516300  |
| C  | 4.47235400  | 0.93022300  | 2.00231800  |
| C  | 4.60450300  | -0.36972000 | 2.49527400  |
| C  | 3.56719800  | -1.00231200 | 3.18845300  |
| C  | 2.35274900  | -0.34751200 | 3.31119600  |
| C  | 2.16238900  | 0.94663600  | 2.77130900  |
| C  | 3.25862000  | 1.58402700  | 2.15222000  |
| H  | 5.30364600  | 1.39055300  | 1.48384700  |
| H  | 3.70842500  | -2.00656200 | 3.56505600  |
| H  | 3.13315300  | 2.58721200  | 1.76015000  |
| C  | 0.83230900  | 1.54353200  | 2.74974200  |
| H  | 0.75553700  | 2.54921000  | 2.33642100  |
| H  | 0.20665400  | 1.37887200  | 3.62831900  |
| C  | 2.30773100  | 3.87273200  | -1.36058600 |
| C  | 2.69347200  | 4.79460400  | -0.38383500 |
| C  | 2.77901200  | 4.07600400  | -2.66127700 |
| C  | 3.50996600  | 5.88251100  | -0.67684100 |
| C  | 3.59665000  | 5.15892400  | -2.98029000 |
| C  | 3.95987300  | 6.06456300  | -1.98441700 |
| C  | -4.22973200 | 2.90635200  | 0.89079500  |
| C  | -5.38390000 | 3.16444300  | 0.14489000  |
| C  | -4.10668100 | 3.54330400  | 2.13061200  |
| C  | -6.38546700 | 4.01066800  | 0.61580600  |
| C  | -5.09365200 | 4.39444200  | 2.62013800  |
| C  | -6.23759300 | 4.62706000  | 1.85750800  |
| C  | -3.55577200 | -3.86434900 | -0.72309700 |
| C  | -4.42179600 | -3.91951200 | -1.82122600 |
| C  | -3.62723500 | -4.90502600 | 0.20845200  |
| C  | -5.31518700 | -4.97385900 | -1.99638000 |
| C  | -4.51118800 | -5.96965900 | 0.05178800  |
| C  | -5.35736800 | -6.00204600 | -1.05575100 |
| C  | 3.34434400  | -2.93836500 | -0.12742700 |
| C  | 4.40547900  | -3.14529600 | -1.01576200 |
| C  | 3.42150300  | -3.58376100 | 1.11425900  |
| C  | 5.52086000  | -3.90106000 | -0.66350200 |
| C  | 4.52747200  | -4.33578400 | 1.49018700  |

|   |             |             |             |
|---|-------------|-------------|-------------|
| C | 5.58741200  | -4.48876500 | 0.59895200  |
| H | 1.51555100  | -0.85234100 | 3.78298800  |
| N | 5.82388100  | -1.11711700 | 2.20703100  |
| O | 6.00411500  | -2.18678000 | 2.79729500  |
| O | 6.59430000  | -0.65820000 | 1.35722100  |
| F | 2.42260300  | -3.45175000 | 2.00076000  |
| F | 4.58615200  | -4.88088500 | 2.70581100  |
| F | 6.65566900  | -5.20021700 | 0.94800200  |
| F | 6.52238600  | -4.06946900 | -1.53037200 |
| F | 4.37314100  | -2.60262800 | -2.24079800 |
| F | -2.83460200 | -4.89212300 | 1.28816200  |
| F | -4.55884200 | -6.95155200 | 0.95708200  |
| F | -6.20823000 | -7.01643500 | -1.21418900 |
| F | -6.12792900 | -5.00651200 | -3.05567100 |
| F | -4.40499400 | -2.94190100 | -2.73172600 |
| F | -3.01437500 | 3.33809900  | 2.87827900  |
| F | -4.95366000 | 4.98504800  | 3.81030800  |
| F | -7.19025700 | 5.43924700  | 2.31609000  |
| F | -7.47937000 | 4.23945300  | -0.11573700 |
| F | -5.54781700 | 2.59282800  | -1.05364600 |
| F | 2.28496000  | 4.63113700  | 0.88855300  |
| F | 3.86633200  | 6.74416800  | 0.27988200  |
| F | 4.74178000  | 7.10280800  | -2.27985600 |
| F | 4.03087000  | 5.33553800  | -4.22996900 |
| F | 2.45108900  | 3.21696900  | -3.62939100 |

**cat3/b2**

|   |             |             |             |
|---|-------------|-------------|-------------|
| C | -1.70169000 | 2.17576800  | -0.59754500 |
| C | -1.91087200 | 3.60369800  | -0.68166000 |
| C | -0.68402800 | 4.17647700  | -0.77008000 |
| C | 0.28712000  | 3.10839500  | -0.68188500 |
| N | -0.35848000 | 1.90421300  | -0.59786700 |
| H | -2.87567900 | 4.08844900  | -0.71242000 |
| H | -0.44938800 | 5.22522800  | -0.87430700 |
| C | 3.42290500  | 0.31963300  | 0.21503400  |
| C | 4.47679600  | 1.29458400  | 0.38289600  |
| C | 3.96221000  | 2.49648300  | 0.01893300  |
| C | 2.57534600  | 2.27417800  | -0.32395500 |
| N | 2.27943900  | 0.94297900  | -0.20763500 |
| H | 5.47896100  | 1.07940100  | 0.72259900  |
| H | 4.45635900  | 3.45703100  | 0.01561700  |
| C | -1.52795500 | -2.08284500 | -1.11588500 |
| C | -2.93281300 | -2.28119500 | -1.37355800 |
| C | -3.54631400 | -1.08824500 | -1.15653800 |

|    |             |             |             |
|----|-------------|-------------|-------------|
| C  | -2.51183100 | -0.13698200 | -0.82515100 |
| N  | -1.29464900 | -0.76588600 | -0.79982100 |
| H  | -3.38572200 | -3.21896700 | -1.66119900 |
| H  | -4.59916200 | -0.86409000 | -1.23300100 |
| C  | 0.74231500  | -2.91831100 | -0.68182600 |
| C  | 1.68400700  | -3.98702500 | -0.46442800 |
| C  | 2.82240800  | -3.41884600 | 0.01676100  |
| C  | 2.59481800  | -1.99537400 | 0.06306100  |
| N  | 1.31588500  | -1.71740000 | -0.35104200 |
| H  | 1.48790700  | -5.03381600 | -0.64625400 |
| H  | 3.74706200  | -3.90931100 | 0.28391600  |
| C  | -2.72931600 | 1.23358300  | -0.64048300 |
| C  | 3.57530600  | -1.05661500 | 0.39517200  |
| C  | 1.66911700  | 3.29778800  | -0.60860600 |
| C  | -0.58081600 | -3.10386300 | -1.08543000 |
| Fe | 0.47960800  | 0.08478100  | -0.44590500 |
| Cl | 0.85221600  | 0.15215900  | -2.71727900 |
| O  | 0.26115500  | 0.20218600  | 1.20187800  |
| C  | 4.87789900  | -1.57165800 | 0.90228900  |
| C  | 4.96983500  | -2.17079700 | 2.16250100  |
| C  | 6.04819000  | -1.50021500 | 0.13968400  |
| C  | 6.17172300  | -2.67418000 | 2.65332300  |
| C  | 7.26388500  | -1.99040400 | 0.61175200  |
| C  | 7.32328400  | -2.58102700 | 1.87309400  |
| C  | -1.02285700 | -4.49056500 | -1.40338900 |
| C  | -1.78282000 | -5.23316000 | -0.49698100 |
| C  | -0.67534600 | -5.10510400 | -2.60936400 |
| C  | -2.20051100 | -6.53175500 | -0.77305800 |
| C  | -1.07689300 | -6.40630200 | -2.90834100 |
| C  | -1.84302900 | -7.11863700 | -1.98679400 |
| C  | -4.13059800 | 1.73179800  | -0.54440900 |
| C  | -4.61047000 | 2.26302600  | 0.65658400  |
| C  | -5.01259300 | 1.71124600  | -1.62926900 |
| C  | -5.91260600 | 2.73545700  | 0.79153400  |
| C  | -6.32172300 | 2.17338900  | -1.51944400 |
| C  | -6.77253800 | 2.68619200  | -0.30344500 |
| C  | 2.21086000  | 4.67774800  | -0.75725400 |
| C  | 1.98318800  | 5.66897300  | 0.20227600  |
| C  | 2.99540200  | 5.02083300  | -1.86365500 |
| C  | 2.49789200  | 6.95585000  | 0.06618500  |
| C  | 3.52579500  | 6.30008500  | -2.01778800 |
| C  | 3.27329800  | 7.26997000  | -1.04895200 |
| C  | -4.39147000 | -0.11802300 | 3.27991800  |
| C  | -3.29784300 | 0.28744100  | 4.04703200  |

|   |             |             |             |
|---|-------------|-------------|-------------|
| C | -3.05687700 | -1.74509500 | 2.14097600  |
| C | -4.28924300 | -1.13591300 | 2.33267000  |
| H | -5.15929500 | -1.42306000 | 1.75573200  |
| C | -1.91956400 | -1.33638500 | 2.86540300  |
| C | -2.06788700 | -0.31736200 | 3.82952300  |
| C | 0.47654000  | -2.06959000 | 3.56233500  |
| C | -0.59094700 | -1.87718400 | 2.49678300  |
| H | 1.42125000  | -2.36786200 | 3.10003100  |
| H | -0.16214000 | -1.00178400 | 1.79036300  |
| H | -0.67088400 | -2.73313200 | 1.81964400  |
| H | 0.17672300  | -2.85184100 | 4.27255700  |
| H | -3.41965400 | 1.08763800  | 4.76640500  |
| H | 0.66167200  | -1.15221400 | 4.12951900  |
| H | -1.20452500 | 0.02789400  | 4.38780100  |
| H | -2.96022100 | -2.53263800 | 1.40306800  |
| N | -5.66796200 | 0.58749500  | 3.43056300  |
| O | -5.79180800 | 1.36288400  | 4.37580900  |
| O | -6.54018100 | 0.36995000  | 2.58359900  |
| F | -3.80637600 | 2.32187900  | 1.72947300  |
| F | -6.33546100 | 3.22197400  | 1.95786300  |
| F | -8.02416000 | 3.13035900  | -0.19184200 |
| F | -7.14447800 | 2.13496300  | -2.57250300 |
| F | -4.60615400 | 1.22687200  | -2.81140800 |
| F | 1.24891000  | 5.39089100  | 1.28820800  |
| F | 2.26171700  | 7.88478700  | 0.99817700  |
| F | 3.77427800  | 8.49861200  | -1.18759400 |
| F | 4.27029000  | 6.60271600  | -3.08520700 |
| F | 3.25685000  | 4.10751000  | -2.80410500 |
| F | 3.87852400  | -2.27508000 | 2.93690600  |
| F | 6.22906300  | -3.23916700 | 3.86320600  |
| F | 8.48086900  | -3.05685700 | 2.33385400  |
| F | 8.36698800  | -1.90581200 | -0.13724900 |
| F | 6.01801000  | -0.94481700 | -1.07728500 |
| F | -2.12505300 | -4.69393600 | 0.68822800  |
| F | -2.92817600 | -7.21795300 | 0.11334300  |
| F | -2.23342700 | -8.36329200 | -2.26408200 |
| F | -0.73593100 | -6.97263300 | -4.06867100 |
| F | 0.06195900  | -4.44296500 | -3.50506500 |

**cat3/b3**

|   |             |             |             |
|---|-------------|-------------|-------------|
| C | -0.13251900 | -2.88480600 | -0.84433500 |
| C | -0.84436600 | -4.13234800 | -0.73800000 |
| C | -2.05689800 | -3.84945300 | -0.18565500 |
| C | -2.11455700 | -2.41955300 | -0.00939300 |

|    |             |             |             |
|----|-------------|-------------|-------------|
| N  | -0.93021600 | -1.85869700 | -0.40569600 |
| H  | -0.45063500 | -5.09838000 | -1.01954000 |
| H  | -2.85885900 | -4.53571900 | 0.04573800  |
| C  | -3.04253300 | 1.72978500  | -0.37153900 |
| C  | -4.43240500 | 1.65087400  | 0.02002900  |
| C  | -4.65517900 | 0.37648800  | 0.43481200  |
| C  | -3.42045000 | -0.34807700 | 0.23781000  |
| N  | -2.45879900 | 0.50303400  | -0.24236100 |
| H  | -5.12736900 | 2.47800400  | 0.01173900  |
| H  | -5.57467500 | -0.04460800 | 0.81349900  |
| C  | 2.46764800  | 0.50668400  | -0.56833600 |
| C  | 3.70780400  | -0.21220600 | -0.75770200 |
| C  | 3.37894300  | -1.48572300 | -1.09846100 |
| C  | 1.94278300  | -1.58334800 | -1.02893600 |
| N  | 1.41204100  | -0.36171100 | -0.69811800 |
| H  | 4.69978900  | 0.19765600  | -0.64887800 |
| H  | 4.04943900  | -2.29865600 | -1.33552400 |
| C  | 1.14298000  | 2.58484500  | -0.53425900 |
| C  | 1.03481600  | 4.01411400  | -0.72760500 |
| C  | -0.28212300 | 4.29048300  | -0.90578900 |
| C  | -0.99738800 | 3.04225400  | -0.76264000 |
| N  | -0.10029400 | 2.02177500  | -0.56957400 |
| H  | 1.86842500  | 4.70020900  | -0.76299000 |
| H  | -0.73642900 | 5.25070400  | -1.09986300 |
| C  | 1.21732200  | -2.76636800 | -1.18182500 |
| C  | -2.38621600 | 2.91974900  | -0.70763700 |
| C  | -3.25477200 | -1.72262500 | 0.40990900  |
| C  | 2.35763900  | 1.89657800  | -0.42662400 |
| Fe | -0.50932600 | 0.07066100  | -0.42589600 |
| Cl | -0.79872000 | 0.08429100  | -2.71823000 |
| O  | -0.40042600 | 0.23546300  | 1.23069900  |
| H  | 0.15914000  | -0.81637500 | 1.97064600  |
| C  | 3.54941100  | 0.99290900  | 3.14441900  |
| C  | 4.58239100  | 0.22278500  | 2.60967700  |
| C  | 4.39070800  | -1.11253500 | 2.25931800  |
| C  | 3.12906800  | -1.67261300 | 2.41316100  |
| C  | 2.04055500  | -0.90989600 | 2.88114800  |
| C  | 2.28478500  | 0.43172100  | 3.24927000  |
| H  | 3.73069500  | 2.02336000  | 3.41599000  |
| H  | 5.21337600  | -1.68412900 | 1.84831100  |
| H  | 2.98719800  | -2.70431300 | 2.12456100  |
| C  | 0.64503700  | -1.45056200 | 2.88163400  |
| C  | -4.35858700 | -2.52003300 | 1.00970000  |
| C  | -4.18494300 | -3.13040300 | 2.25645800  |



|   |             |             |             |
|---|-------------|-------------|-------------|
| C | -5.58417200 | -2.71683300 | 0.36630600  |
| C | -5.18323600 | -3.89805800 | 2.84914800  |
| C | -6.60119500 | -3.47658600 | 0.94097500  |
| C | -6.39760900 | -4.07008400 | 2.18583700  |
| C | 1.92406600  | -3.99129400 | -1.65174100 |
| C | 1.70840700  | -4.48243200 | -2.94363000 |
| C | 2.79819100  | -4.70788700 | -0.83205200 |
| C | 2.34323500  | -5.63483400 | -3.40433500 |
| C | 3.44817000  | -5.85843800 | -1.26922700 |
| C | 3.21744900  | -6.32204000 | -2.56370200 |
| C | 3.58385900  | 2.70325100  | -0.18472000 |
| C | 4.66854300  | 2.74924500  | -1.06830800 |
| C | 3.69673400  | 3.45954500  | 0.98925800  |
| C | 5.83552800  | 3.44713100  | -0.76633100 |
| C | 4.85112200  | 4.16150900  | 1.31390400  |
| C | 5.93123800  | 4.14841400  | 0.43426100  |
| C | -3.22544800 | 4.13172900  | -0.91713800 |
| C | -4.08428100 | 4.22006500  | -2.01865300 |
| C | -3.21791000 | 5.20487900  | -0.02039900 |
| C | -4.89333700 | 5.33442500  | -2.23037900 |
| C | -4.01387600 | 6.33097600  | -0.21481700 |
| C | -4.85492600 | 6.39340700  | -1.32479300 |
| C | 0.48225400  | -2.92434600 | 2.53353600  |
| H | -0.57819100 | -3.17631200 | 2.45832000  |
| H | 0.96085700  | -3.19135900 | 1.58973000  |
| H | 0.92265500  | -3.55044200 | 3.32295900  |
| C | -0.24397600 | -1.04117000 | 4.05767500  |
| H | 0.10630300  | -1.52412500 | 4.98029500  |
| H | -0.25875700 | 0.03868900  | 4.22196700  |
| H | -1.27207400 | -1.36500600 | 3.87123200  |
| H | 1.46690400  | 1.05836400  | 3.58380900  |
| N | 5.86973000  | 0.85863300  | 2.32841800  |
| O | 6.64739600  | 0.26854300  | 1.57358200  |
| O | 6.09240000  | 1.96306500  | 2.83031900  |
| F | -3.02580800 | -2.98112700 | 2.92119600  |
| F | -4.98779600 | -4.46468300 | 4.04357600  |
| F | -7.36363500 | -4.80190100 | 2.74233300  |
| F | -7.76308800 | -3.64705600 | 0.30417700  |
| F | -5.80447800 | -2.16713400 | -0.83380900 |
| F | -2.43016200 | 5.16590800  | 1.06311500  |
| F | -3.98482500 | 7.34296700  | 0.65845900  |
| F | -5.62409800 | 7.46605200  | -1.51877200 |
| F | -5.70180300 | 5.39544800  | -3.29242200 |
| F | -4.14411000 | 3.21630200  | -2.89922300 |

|   |            |             |             |
|---|------------|-------------|-------------|
| F | 2.67783000 | 3.49469400  | 1.86507200  |
| F | 4.93433300 | 4.81899700  | 2.47183200  |
| F | 7.04665700 | 4.80967200  | 0.73490300  |
| F | 6.85733100 | 3.45624300  | -1.62656800 |
| F | 4.60955000 | 2.10411700  | -2.24171400 |
| F | 3.02944900 | -4.29316000 | 0.42738500  |
| F | 4.27923500 | -6.52083900 | -0.45841800 |
| F | 3.83101200 | -7.42463400 | -2.99531800 |
| F | 2.12148400 | -6.08303100 | -4.64254700 |
| F | 0.87225800 | -3.84475500 | -3.76658900 |

**cat3/b4**

|   |             |             |             |
|---|-------------|-------------|-------------|
| C | -1.66861100 | -1.95184300 | -1.28825100 |
| C | -3.08613800 | -2.05016400 | -1.53748300 |
| C | -3.61758600 | -0.82553200 | -1.28029800 |
| C | -2.51845400 | 0.04578800  | -0.93522900 |
| N | -1.34668200 | -0.66133000 | -0.94651500 |
| H | -3.60245300 | -2.94867800 | -1.84347100 |
| H | -4.65351000 | -0.52927400 | -1.34043700 |
| C | 0.49957100  | 3.08445500  | -0.79702600 |
| C | -0.39682800 | 4.21840500  | -0.85427900 |
| C | -1.65836200 | 3.73172700  | -0.73518400 |
| C | -1.54801000 | 2.29160500  | -0.67021000 |
| N | -0.22705000 | 1.92861000  | -0.70740800 |
| H | -0.09263800 | 5.24934900  | -0.95702300 |
| H | -2.58732800 | 4.28315100  | -0.73678000 |
| C | 2.42412100  | -2.16390600 | -0.03364300 |
| C | 2.54906800  | -3.59980900 | -0.08043100 |
| C | 1.39084200  | -4.08218600 | -0.60756800 |
| C | 0.53460100  | -2.94776500 | -0.84545200 |
| N | 1.18495400  | -1.79348600 | -0.49191400 |
| H | 3.42658800  | -4.15652900 | 0.21471600  |
| H | 1.12688700  | -5.11096800 | -0.80606000 |
| C | 3.41494500  | 0.08487000  | 0.13305100  |
| C | 4.53457000  | 0.98271400  | 0.30843700  |
| C | 4.11791600  | 2.21248600  | -0.08798700 |
| C | 2.72340100  | 2.08817900  | -0.45032200 |
| N | 2.33035100  | 0.78375400  | -0.32309100 |
| H | 5.51248700  | 0.70066100  | 0.66906200  |
| H | 4.68222400  | 3.13360200  | -0.09833800 |
| C | -0.79273600 | -3.03514000 | -1.26800000 |
| C | 1.89320000  | 3.17329300  | -0.74075700 |
| C | -2.63842800 | 1.42213700  | -0.70274100 |
| C | 3.45647000  | -1.29677100 | 0.33598200  |

|    |             |             |             |
|----|-------------|-------------|-------------|
| Fe | 0.48074700  | 0.05725600  | -0.57682700 |
| Cl | 0.86074200  | 0.11879700  | -2.84909200 |
| O  | 0.24824400  | 0.16606900  | 1.06876900  |
| H  | -0.15829800 | -1.07279300 | 1.63121600  |
| C  | 0.21832800  | -1.59558600 | 3.68804800  |
| C  | -0.46724800 | -0.33093000 | 4.27053600  |
| C  | -0.58552500 | -1.88034900 | 2.41595800  |
| C  | -1.93667700 | -1.36078100 | 2.67900400  |
| C  | -3.12941800 | -1.60410200 | 1.98959600  |
| C  | -4.25860700 | -0.86413800 | 2.31909100  |
| C  | -4.17256400 | 0.09005400  | 3.33881100  |
| C  | -3.00144700 | 0.32205400  | 4.06777300  |
| C  | -1.87604800 | -0.41178000 | 3.72472800  |
| H  | -3.16678400 | -2.34405800 | 1.19985100  |
| H  | -2.99469000 | 1.07470700  | 4.84696300  |
| H  | -5.19770800 | -0.99994700 | 1.79803600  |
| H  | 0.02169900  | 0.57140600  | 3.87989500  |
| H  | 1.28442700  | -1.45973200 | 3.49021300  |
| H  | -0.48593400 | -2.84980300 | 1.92154700  |
| N  | -5.35352800 | 0.91565800  | 3.62283900  |
| O  | -5.31915400 | 1.65497400  | 4.60401300  |
| O  | -6.31041700 | 0.82760900  | 2.84744300  |
| C  | -3.99590600 | 2.01063300  | -0.52657700 |
| C  | -4.92697500 | 2.09399700  | -1.56606200 |
| C  | -4.37782600 | 2.53148100  | 0.71424000  |
| C  | -6.19009500 | 2.64923200  | -1.37681200 |
| C  | -5.63066800 | 3.09915200  | 0.92762200  |
| C  | -6.54205500 | 3.15319600  | -0.12499400 |
| C  | 2.53421000  | 4.50895400  | -0.89783000 |
| C  | 3.32749700  | 4.79140900  | -2.01491700 |
| C  | 2.39706000  | 5.51353800  | 0.06493800  |
| C  | 3.95222200  | 6.02646400  | -2.17672200 |
| C  | 3.00669800  | 6.75733300  | -0.07866700 |
| C  | 3.78814100  | 7.01202100  | -1.20472000 |
| C  | 4.67941900  | -1.90162900 | 0.93192200  |
| C  | 5.90462000  | -1.93212400 | 0.25878800  |
| C  | 4.63068900  | -2.48853400 | 2.20088100  |
| C  | 7.03979400  | -2.50767900 | 0.82576300  |
| C  | 5.74966800  | -3.07470200 | 2.78610600  |
| C  | 6.95966500  | -3.08187900 | 2.09350900  |
| C  | -1.33209000 | -4.38635400 | -1.58916000 |
| C  | -1.06946100 | -5.00580600 | -2.81332600 |
| C  | -2.10345200 | -5.08934400 | -0.66103000 |
| C  | -1.56506200 | -6.27506700 | -3.10945600 |

|   |             |             |             |
|---|-------------|-------------|-------------|
| C | -2.61344600 | -6.35520000 | -0.93361300 |
| C | -2.33982800 | -6.94840100 | -2.16610800 |
| H | -0.43090300 | -0.27908500 | 5.36385100  |
| H | 0.11172000  | -2.44054400 | 4.38289500  |
| F | -2.36590700 | -4.54143000 | 0.54021300  |
| F | -3.35023500 | -7.00490600 | -0.02733500 |
| F | -2.81916800 | -8.16236000 | -2.44074700 |
| F | -1.30445800 | -6.84821800 | -4.28723600 |
| F | -0.32623600 | -4.38027800 | -3.73006900 |
| F | -3.52340200 | 2.48866800  | 1.74813600  |
| F | -5.95691400 | 3.58282600  | 2.12555300  |
| F | -7.74819400 | 3.68935000  | 0.06086200  |
| F | -7.06167100 | 2.71019800  | -2.38873900 |
| F | -4.61496500 | 1.62355100  | -2.78234900 |
| F | 1.66067300  | 5.29049500  | 1.16235800  |
| F | 2.85675600  | 7.70064200  | 0.85684300  |
| F | 4.38006700  | 8.19875900  | -1.35031400 |
| F | 4.70321100  | 6.27185200  | -3.25425600 |
| F | 3.50473300  | 3.86157700  | -2.95858200 |
| F | 3.47766600  | -2.50283200 | 2.88874800  |
| F | 5.67242900  | -3.62533400 | 4.00156200  |
| F | 8.03987300  | -3.63841200 | 2.64346300  |
| F | 8.19858000  | -2.52081100 | 0.16102000  |
| F | 6.00866100  | -1.39527000 | -0.96277900 |

**cat3/b5**

|   |             |             |             |
|---|-------------|-------------|-------------|
| C | -1.71469200 | -1.92900200 | -1.27376400 |
| C | -3.13340000 | -2.01648300 | -1.53103800 |
| C | -3.66347900 | -0.80171000 | -1.23165200 |
| C | -2.55936400 | 0.05794300  | -0.86611300 |
| N | -1.39302800 | -0.64446400 | -0.89717500 |
| H | -3.65445900 | -2.90104000 | -1.86605400 |
| H | -4.69883700 | -0.50158700 | -1.28340400 |
| C | 0.45541200  | 3.09010500  | -0.79811700 |
| C | -0.43825500 | 4.22975400  | -0.82702700 |
| C | -1.69674000 | 3.74788000  | -0.66599000 |
| C | -1.58812800 | 2.30662000  | -0.60679300 |
| N | -0.26674400 | 1.94017200  | -0.68633100 |
| H | -0.13434400 | 5.25960300  | -0.94013500 |
| H | -2.62381800 | 4.30174700  | -0.63675900 |
| C | 2.36121400  | -2.14920300 | 0.04907700  |
| C | 2.47242400  | -3.58728600 | 0.03632900  |
| C | 1.32092700  | -4.06785700 | -0.50749500 |
| C | 0.48037900  | -2.92887600 | -0.78412300 |

|    |             |             |             |
|----|-------------|-------------|-------------|
| N  | 1.12871300  | -1.77847600 | -0.43352700 |
| H  | 3.33892900  | -4.14771500 | 0.35585000  |
| H  | 1.05296600  | -5.09823100 | -0.69086200 |
| C  | 3.37333500  | 0.09907400  | 0.13395600  |
| C  | 4.50468300  | 0.99221400  | 0.26288500  |
| C  | 4.09153200  | 2.21257400  | -0.16458900 |
| C  | 2.68855800  | 2.08872700  | -0.49599800 |
| N  | 2.28973100  | 0.78902500  | -0.32522200 |
| H  | 5.48661400  | 0.71453100  | 0.61523600  |
| H  | 4.66300200  | 3.12808500  | -0.21156600 |
| C  | -0.83962500 | -3.01149300 | -1.25391100 |
| C  | 1.85597100  | 3.17058000  | -0.78466400 |
| C  | -2.67555800 | 1.43740200  | -0.61469400 |
| C  | 3.39981000  | -1.27978600 | 0.38886900  |
| Fe | 0.43568000  | 0.07302900  | -0.53391000 |
| Cl | 0.79233200  | 0.08966300  | -2.82889800 |
| O  | 0.21693500  | 0.19959300  | 1.11172000  |
| H  | 0.12327400  | -0.91448000 | 1.84356000  |
| C  | 0.45504700  | -1.28085400 | 3.89381100  |
| C  | -0.41804800 | -0.49961300 | 4.61029700  |
| C  | -0.20610500 | -1.79204300 | 2.69756600  |
| C  | -1.63088600 | -1.40130300 | 2.84566000  |
| C  | -2.73064300 | -1.63708100 | 2.03570300  |
| C  | -3.92730800 | -0.96278800 | 2.30825700  |
| C  | -3.98919100 | -0.08274800 | 3.39009500  |
| C  | -2.90766800 | 0.13765300  | 4.25087700  |
| C  | -1.72069500 | -0.53411400 | 3.97029900  |
| H  | -2.67008300 | -2.31049200 | 1.19020900  |
| H  | -3.00971600 | 0.82737200  | 5.07991000  |
| H  | -4.80005100 | -1.09872400 | 1.68309000  |
| H  | -0.18407000 | 0.06636600  | 5.50482300  |
| H  | 1.50406000  | -1.43182000 | 4.11371800  |
| H  | 0.08786300  | -2.73549500 | 2.23725500  |
| N  | -5.22398100 | 0.67700500  | 3.60379200  |
| O  | -5.31398600 | 1.36381100  | 4.61964000  |
| O  | -6.10353500 | 0.59522400  | 2.73948400  |
| C  | -4.03158600 | 2.02096600  | -0.41155900 |
| C  | -4.96699100 | 2.13379600  | -1.44418900 |
| C  | -4.40686700 | 2.50046100  | 0.84690000  |
| C  | -6.22968400 | 2.68053200  | -1.23179600 |
| C  | -5.66166800 | 3.05401400  | 1.08494900  |
| C  | -6.57671200 | 3.14147900  | 0.03811200  |
| C  | 2.49890400  | 4.49842900  | -0.99082300 |
| C  | 3.26053700  | 4.74767200  | -2.13769500 |

|   |             |             |             |
|---|-------------|-------------|-------------|
| C | 2.39577700  | 5.52690400  | -0.04925600 |
| C | 3.88623000  | 5.97474900  | -2.34861400 |
| C | 3.00802300  | 6.76274200  | -0.24161300 |
| C | 3.75656400  | 6.98475500  | -1.39669700 |
| C | 4.61111300  | -1.87591700 | 1.01556000  |
| C | 5.84980700  | -1.92321100 | 0.36835400  |
| C | 4.53542600  | -2.44280300 | 2.29276700  |
| C | 6.97148100  | -2.49062000 | 0.96941600  |
| C | 5.64014300  | -3.01963200 | 2.91243600  |
| C | 6.86451500  | -3.04118900 | 2.24567000  |
| C | -1.33932200 | -4.35146900 | -1.66897200 |
| C | -0.84405200 | -4.96978700 | -2.82262700 |
| C | -2.28876500 | -5.05464500 | -0.92210900 |
| C | -1.28330600 | -6.22929300 | -3.22538500 |
| C | -2.74733900 | -6.31156200 | -1.30689800 |
| C | -2.23973000 | -6.89994600 | -2.46439900 |
| F | -2.78539300 | -4.52156200 | 0.20735400  |
| F | -3.65691600 | -6.95801700 | -0.57173300 |
| F | -2.66775300 | -8.10514800 | -2.84145600 |
| F | -0.79690000 | -6.79600200 | -4.33249000 |
| F | 0.07807400  | -4.35066700 | -3.56492400 |
| F | -3.54796300 | 2.42167700  | 1.87367000  |
| F | -5.98711700 | 3.48908900  | 2.30084100  |
| F | -7.78430900 | 3.66596200  | 0.24711900  |
| F | -7.10611900 | 2.77285200  | -2.23713700 |
| F | -4.65781700 | 1.70056300  | -2.67525700 |
| F | 1.69146100  | 5.33468500  | 1.07450000  |
| F | 2.89178400  | 7.72941200  | 0.67424100  |
| F | 4.35001100  | 8.16371400  | -1.58936200 |
| F | 4.60587400  | 6.18900800  | -3.45353000 |
| F | 3.40419500  | 3.79387400  | -3.06242900 |
| F | 3.36629700  | -2.44732100 | 2.95513400  |
| F | 5.53510500  | -3.54852800 | 4.13506100  |
| F | 7.93173000  | -3.58911400 | 2.82764400  |
| F | 8.14285500  | -2.51895900 | 0.32840900  |
| F | 5.98080900  | -1.41232500 | -0.86175800 |

**cat3/b6**

|   |             |             |             |
|---|-------------|-------------|-------------|
| C | -1.53600400 | -1.99410100 | -1.39748300 |
| C | -2.93717200 | -2.14551900 | -1.70552300 |
| C | -3.52942700 | -0.94862800 | -1.44859900 |
| C | -2.48250100 | -0.04001000 | -1.04358600 |
| N | -1.28162200 | -0.69519300 | -1.02779700 |
| H | -3.40400600 | -3.05728500 | -2.04901900 |

|    |             |             |             |
|----|-------------|-------------|-------------|
| H  | -4.57330400 | -0.69498200 | -1.54986600 |
| C  | 0.38151300  | 3.12611200  | -0.77326100 |
| C  | -0.56298800 | 4.22144900  | -0.74027800 |
| C  | -1.80151400 | 3.67269900  | -0.64903900 |
| C  | -1.62624100 | 2.23801900  | -0.67984200 |
| N  | -0.28952700 | 1.93772200  | -0.74793400 |
| H  | -0.29954100 | 5.26894900  | -0.75679200 |
| H  | -2.75367700 | 4.18101700  | -0.60398600 |
| C  | 2.54158600  | -2.03257800 | -0.06297800 |
| C  | 2.72080700  | -3.46395400 | -0.08160700 |
| C  | 1.58490600  | -3.99813800 | -0.60640300 |
| C  | 0.68998500  | -2.89994000 | -0.87482300 |
| N  | 1.28900300  | -1.71745500 | -0.52851100 |
| H  | 3.61644000  | -3.98175000 | 0.22963100  |
| H  | 1.36106000  | -5.03965900 | -0.78647300 |
| C  | 3.44368800  | 0.25745800  | 0.06081300  |
| C  | 4.54639800  | 1.18802500  | 0.15847800  |
| C  | 4.07090200  | 2.40160700  | -0.21866700 |
| C  | 2.65878600  | 2.23685500  | -0.48484200 |
| N  | 2.31377900  | 0.91838600  | -0.33198100 |
| H  | 5.55384300  | 0.93443800  | 0.45342300  |
| H  | 4.61464500  | 3.33179000  | -0.28831400 |
| C  | -0.62002500 | -3.04255200 | -1.33937300 |
| C  | 1.77169900  | 3.28471800  | -0.73440300 |
| C  | -2.67219600 | 1.32007500  | -0.75898100 |
| C  | 3.54654600  | -1.12071700 | 0.26746400  |
| Fe | 0.50197200  | 0.10271700  | -0.61432200 |
| O  | 0.22698800  | 0.19171700  | 1.02375600  |
| C  | -1.09300000 | -4.41525200 | -1.67083200 |
| C  | -0.69474200 | -5.06065000 | -2.84446600 |
| C  | -1.93279000 | -5.11606200 | -0.80149300 |
| C  | -1.12479600 | -6.35111800 | -3.14993200 |
| C  | -2.37975100 | -6.40310600 | -1.08557400 |
| C  | -1.97138800 | -7.02085600 | -2.26761800 |
| C  | -4.05601800 | 1.83068500  | -0.55047100 |
| C  | -5.00283600 | 1.91130200  | -1.57524700 |
| C  | -4.44840300 | 2.27594300  | 0.71672400  |
| C  | -6.29094600 | 2.39013700  | -1.34829500 |
| C  | -5.72533800 | 2.76959700  | 0.96640600  |
| C  | -6.65268200 | 2.82067300  | -0.07220700 |
| C  | 2.30942100  | 4.66605900  | -0.88020400 |
| C  | 2.89898800  | 5.35122900  | 0.18675600  |
| C  | 2.20895800  | 5.34186600  | -2.10153400 |
| C  | 3.38733300  | 6.64808700  | 0.04810800  |

|    |             |             |             |
|----|-------------|-------------|-------------|
| C  | 2.68493100  | 6.64133900  | -2.26182500 |
| C  | 3.27754100  | 7.29435700  | -1.18216000 |
| C  | 4.82956000  | -1.66842200 | 0.79267400  |
| C  | 5.98436300  | -1.72122800 | 0.00641200  |
| C  | 4.91467200  | -2.17137300 | 2.09382000  |
| C  | 7.18087900  | -2.24319200 | 0.49338000  |
| C  | 6.09709900  | -2.70405100 | 2.60129500  |
| C  | 7.23424300  | -2.73805400 | 1.79563700  |
| F  | -2.32267500 | -4.54715100 | 0.35400500  |
| F  | -3.18330400 | -7.05001200 | -0.23597200 |
| F  | -2.38934100 | -8.25509600 | -2.55155300 |
| F  | -0.73445300 | -6.94764200 | -4.27928500 |
| F  | 0.12101300  | -4.43985100 | -3.70118000 |
| F  | -3.58090800 | 2.23096400  | 1.73895200  |
| F  | -6.05962700 | 3.18409200  | 2.18863000  |
| F  | -7.88203400 | 3.28430800  | 0.14990800  |
| F  | -7.17724500 | 2.44832700  | -2.34736700 |
| F  | -4.68235800 | 1.51165900  | -2.81475700 |
| F  | 3.00687000  | 4.75881300  | 1.38422800  |
| F  | 3.94835600  | 7.27741700  | 1.08573600  |
| F  | 3.73808000  | 8.53808000  | -1.32585400 |
| F  | 2.57937000  | 7.26339100  | -3.43945100 |
| F  | 1.63892400  | 4.74040200  | -3.15040000 |
| F  | 3.83732400  | -2.14868300 | 2.89428800  |
| F  | 6.14952900  | -3.17617300 | 3.85058800  |
| F  | 8.37318400  | -3.24341500 | 2.27147300  |
| F  | 8.27077100  | -2.27964400 | -0.27852000 |
| F  | 5.95703700  | -1.25601100 | -1.24786800 |
| C1 | 0.93121900  | 0.19197800  | -2.88112200 |
| C  | -4.27773000 | -0.99818100 | 2.14634100  |
| C  | -3.06001600 | -1.59877500 | 1.87579600  |
| C  | -3.30230600 | -0.00844300 | 4.15388700  |
| C  | -4.37542000 | -0.19465200 | 3.28385000  |
| H  | -5.13468700 | -1.12530500 | 1.49757800  |
| H  | -2.95342100 | -2.22577900 | 0.99884400  |
| C  | -2.07325700 | -0.60673300 | 3.88013600  |
| C  | -1.94319200 | -1.39901300 | 2.71149600  |
| C  | 0.45938600  | -0.70137100 | 4.19288300  |
| C  | 0.44286300  | -2.00104100 | 3.37710400  |
| C  | -0.62449800 | -1.91466900 | 2.29680000  |
| C  | -0.91001700 | -0.44594600 | 4.84083500  |
| H  | 1.23295400  | -0.74315100 | 4.96771100  |
| H  | 1.41919100  | -2.18423900 | 2.91909900  |
| H  | -1.05476400 | -1.15978000 | 5.66677500  |



|   |             |             |            |
|---|-------------|-------------|------------|
| H | -0.94243400 | 0.55178700  | 5.29421800 |
| H | -0.68404800 | -2.77754800 | 1.62585100 |
| H | 0.71211900  | 0.12740600  | 3.52075600 |
| H | 0.22753500  | -2.85870100 | 4.03431400 |
| H | -0.22961900 | -1.02975200 | 1.57862900 |
| H | -3.43527000 | 0.61947900  | 5.02744100 |
| N | -5.63941000 | 0.50215800  | 3.54965600 |
| O | -6.52702500 | 0.41435500  | 2.69577300 |
| O | -5.74200800 | 1.13714300  | 4.59720600 |

**cat3/b7**

|    |             |             |             |
|----|-------------|-------------|-------------|
| C  | -2.05985700 | -1.28371700 | -1.28105500 |
| C  | -3.48508100 | -1.08117500 | -1.36871400 |
| C  | -3.71864000 | 0.21991900  | -1.06232500 |
| C  | -2.43178000 | 0.83794500  | -0.84294100 |
| N  | -1.43938800 | -0.10037700 | -0.96684900 |
| H  | -4.21115100 | -1.84978300 | -1.58849000 |
| H  | -4.67355800 | 0.71675400  | -0.99662600 |
| C  | 1.18062400  | 3.15981800  | -0.73488700 |
| C  | 0.54793600  | 4.46039700  | -0.75104700 |
| C  | -0.78775800 | 4.25026000  | -0.63944900 |
| C  | -0.98433300 | 2.81856400  | -0.61038400 |
| N  | 0.22367200  | 2.18111200  | -0.67568100 |
| H  | 1.06571300  | 5.40481300  | -0.82750700 |
| H  | -1.57955600 | 4.98489100  | -0.61809600 |
| C  | 1.98749800  | -2.43548900 | -0.44926400 |
| C  | 1.80404500  | -3.85849900 | -0.59979000 |
| C  | 0.52810100  | -4.04936900 | -1.02838800 |
| C  | -0.09143900 | -2.74918800 | -1.09190100 |
| N  | 0.81401700  | -1.78229100 | -0.73717900 |
| H  | 2.56151400  | -4.60848400 | -0.42716200 |
| H  | 0.04505100  | -4.98401500 | -1.27256800 |
| C  | 3.42831800  | -0.45319000 | -0.17565700 |
| C  | 4.72633500  | 0.16423800  | -0.02494500 |
| C  | 4.55617100  | 1.49207900  | -0.24978500 |
| C  | 3.14785600  | 1.69762000  | -0.50469100 |
| N  | 2.48837600  | 0.49972500  | -0.45854500 |
| H  | 5.64369700  | -0.36168300 | 0.19666800  |
| H  | 5.30336300  | 2.27171500  | -0.22502900 |
| C  | -1.44121500 | -2.52954200 | -1.37891400 |
| C  | 2.56022200  | 2.95124100  | -0.69295400 |
| C  | -2.23803600 | 2.20397900  | -0.60660400 |
| C  | 3.20373200  | -1.82949900 | -0.12583300 |
| Fe | 0.51149600  | 0.19376100  | -0.65704500 |

|    |             |             |             |
|----|-------------|-------------|-------------|
| C1 | 0.82625600  | 0.30818100  | -2.94689300 |
| O  | 0.37166700  | 0.22996100  | 1.00211600  |
| H  | -0.34126900 | -0.82512400 | 1.55915600  |
| C  | 0.15202500  | -1.69689700 | 5.81015000  |
| C  | 1.42040500  | -2.27000200 | 5.67507400  |
| C  | 1.88724600  | -2.63797300 | 4.40737200  |
| C  | 1.08915100  | -2.43794700 | 3.28786200  |
| C  | -0.19583700 | -1.86414500 | 3.40890100  |
| C  | -0.64649100 | -1.48776300 | 4.68894900  |
| H  | -0.21601700 | -1.41536800 | 6.79285500  |
| H  | 2.87995500  | -3.06039500 | 4.29343900  |
| H  | 1.45513800  | -2.70549800 | 2.30059600  |
| H  | -1.63291600 | -1.05103000 | 4.80354500  |
| C  | -0.99096100 | -1.65320600 | 2.17242200  |
| H  | -0.94776200 | -2.51760200 | 1.50272000  |
| C  | -2.35958300 | -1.06777600 | 2.25992900  |
| C  | -2.53032800 | 0.27635700  | 2.64218700  |
| C  | -3.49303600 | -1.82681400 | 1.92209200  |
| C  | -3.79545300 | 0.84775900  | 2.69083600  |
| H  | -1.65690700 | 0.88021000  | 2.86616200  |
| C  | -4.76511500 | -1.26491800 | 1.95599000  |
| C  | -4.89624000 | 0.07281400  | 2.32775100  |
| H  | -3.93582700 | 1.87850400  | 2.98202600  |
| H  | -5.64528900 | -1.83334400 | 1.68172100  |
| C  | -3.42840400 | 3.05187800  | -0.32462100 |
| C  | -4.45317200 | 3.27297800  | -1.25019200 |
| C  | -3.58316200 | 3.62829800  | 0.94070900  |
| C  | -5.60281400 | 3.98591900  | -0.91685100 |
| C  | -4.72796800 | 4.32796400  | 1.30334400  |
| C  | -5.74477800 | 4.50747500  | 0.36827500  |
| C  | -2.29399400 | -3.70095700 | -1.72518800 |
| C  | -2.63150500 | -4.66772800 | -0.77479800 |
| C  | -2.81327200 | -3.86180400 | -3.01386500 |
| C  | -3.44517300 | -5.75477000 | -1.07875800 |
| C  | -3.63156600 | -4.94090700 | -3.34444300 |
| C  | -3.94507700 | -5.89070500 | -2.37340700 |
| C  | 3.46412000  | 4.13228000  | -0.78133000 |
| C  | 4.30148800  | 4.31052300  | -1.88797300 |
| C  | 3.53080000  | 5.08884200  | 0.23649500  |
| C  | 5.16502600  | 5.39950400  | -1.98621700 |
| C  | 4.38207000  | 6.18826200  | 0.15713400  |
| C  | 5.20255700  | 6.34143500  | -0.95935400 |
| C  | 4.35038800  | -2.70644000 | 0.24646300  |
| C  | 4.79816900  | -2.76383100 | 1.56832500  |

|   |             |             |             |
|---|-------------|-------------|-------------|
| C | 5.02032500  | -3.49559400 | -0.69276800 |
| C | 5.85506000  | -3.58209400 | 1.95630100  |
| C | 6.08355700  | -4.32082500 | -0.33083100 |
| C | 6.50203800  | -4.36169800 | 0.99876100  |
| H | 2.04370500  | -2.42679700 | 6.55097700  |
| H | -3.36745900 | -2.86076300 | 1.62006700  |
| N | -6.22114300 | 0.70393400  | 2.28239000  |
| O | -6.28547400 | 1.91806400  | 2.49459900  |
| O | -7.18910200 | -0.00794900 | 2.01563700  |
| F | -2.62359600 | 3.47288300  | 1.86988400  |
| F | -4.86079000 | 4.80136500  | 2.54378700  |
| F | -6.84741100 | 5.17693500  | 0.69884600  |
| F | -6.56897100 | 4.17142500  | -1.82120400 |
| F | -4.35585400 | 2.77246500  | -2.48963900 |
| F | 2.75973800  | 4.96149900  | 1.32476700  |
| F | 4.42339400  | 7.08887300  | 1.14429100  |
| F | 6.02456600  | 7.38882800  | -1.04397800 |
| F | 5.95295100  | 5.54770100  | -3.05524100 |
| F | 4.28956500  | 3.41808200  | -2.88331500 |
| F | 4.19056500  | -2.02350200 | 2.50835300  |
| F | 6.24406500  | -3.62721200 | 3.23490200  |
| F | 7.51721400  | -5.15032400 | 1.35455000  |
| F | 6.70509200  | -5.06893900 | -1.24677900 |
| F | 4.63385100  | -3.48007500 | -1.97330900 |
| F | -2.17497600 | -4.55530800 | 0.48866800  |
| F | -3.75235600 | -6.65888900 | -0.14351900 |
| F | -4.72605200 | -6.92699900 | -2.68012200 |
| F | -4.11326900 | -5.07237900 | -4.58264600 |
| F | -2.53442900 | -2.96226200 | -3.96085500 |

**cat3/b8**

|   |             |             |             |
|---|-------------|-------------|-------------|
| C | 2.48885800  | 0.51760500  | -1.25677200 |
| C | 3.69425900  | -0.14726600 | -1.69729000 |
| C | 3.34390000  | -1.41975400 | -2.02755100 |
| C | 1.94038900  | -1.56059000 | -1.72062100 |
| N | 1.43921600  | -0.34983600 | -1.29928800 |
| H | 4.66696900  | 0.31068800  | -1.78364700 |
| H | 3.97927600  | -2.20315800 | -2.41458600 |
| C | -2.01957300 | -2.41415600 | -0.30039500 |
| C | -1.87530200 | -3.84960500 | -0.24653900 |
| C | -0.67760900 | -4.14781600 | -0.82049900 |
| C | -0.05646800 | -2.89387600 | -1.17203200 |
| N | -0.88201500 | -1.85849400 | -0.83896700 |
| H | -2.60861900 | -4.53990000 | 0.14244800  |

|    |             |             |             |
|----|-------------|-------------|-------------|
| H  | -0.23876500 | -5.12346500 | -0.97191400 |
| C  | -0.93036000 | 3.05921300  | -1.05480500 |
| C  | -0.22115100 | 4.31615100  | -0.93393500 |
| C  | 1.09110300  | 4.01290400  | -0.75617600 |
| C  | 1.19989400  | 2.57302500  | -0.83746000 |
| N  | -0.04742800 | 2.02623300  | -1.01128300 |
| H  | -0.68152000 | 5.29335500  | -0.95066700 |
| H  | 1.92227000  | 4.69165500  | -0.62987400 |
| C  | -2.99822900 | 1.73767200  | -0.84402400 |
| C  | -4.42241300 | 1.60538700  | -0.62310200 |
| C  | -4.63943300 | 0.33146200  | -0.20669400 |
| C  | -3.35909900 | -0.34234600 | -0.23697100 |
| N  | -2.38966600 | 0.52331000  | -0.63784200 |
| H  | -5.14960800 | 2.39385000  | -0.74724300 |
| H  | -5.57843400 | -0.13102600 | 0.06151700  |
| C  | 2.40150500  | 1.87078300  | -0.87265600 |
| C  | -3.17640200 | -1.70717300 | 0.03441400  |
| C  | 1.25030400  | -2.76846100 | -1.66732400 |
| C  | -2.33056800 | 2.93833400  | -1.08140300 |
| Fe | -0.46333300 | 0.08041200  | -0.90109700 |
| Cl | -0.87557400 | 0.09700300  | -3.18655800 |
| O  | -0.21396300 | 0.18719400  | 0.73995300  |
| H  | 0.37937400  | -0.87341400 | 1.30220600  |
| C  | 4.26204200  | 0.44913000  | 3.34840900  |
| C  | 4.41111500  | -0.18636400 | 2.11279200  |
| C  | 3.36842100  | -0.97012400 | 1.61962100  |
| C  | 2.20217600  | -1.09278900 | 2.37181400  |
| C  | 2.08021900  | -0.46698900 | 3.64194100  |
| C  | 3.11378100  | 0.31490500  | 4.13967000  |
| H  | 3.46710700  | -1.47463100 | 0.66699600  |
| H  | 3.05990100  | 0.81944400  | 5.09670200  |
| C  | 0.92046900  | -1.73956600 | 2.02853800  |
| C  | 0.09712300  | -1.63841600 | 3.24750400  |
| C  | -1.19341900 | -2.10659400 | 3.49526900  |
| C  | -1.81021700 | -1.77325500 | 4.70451600  |
| C  | -1.14622200 | -0.97407100 | 5.64369400  |
| C  | 0.14642100  | -0.48802900 | 5.39576700  |
| C  | 0.76510600  | -0.81754400 | 4.19469200  |
| H  | -1.70871200 | -2.70690100 | 2.75117900  |
| H  | -1.64221600 | -0.71926200 | 6.57599100  |
| H  | 0.64859400  | 0.13579100  | 6.13031800  |
| C  | 1.97766200  | -4.01875000 | -2.01779300 |
| C  | 1.65188500  | -4.75278700 | -3.16187100 |
| C  | 2.99021700  | -4.51928100 | -1.19435000 |

|   |             |             |             |
|---|-------------|-------------|-------------|
| C | 2.31973100  | -5.93240200 | -3.48626400 |
| C | 3.67415600  | -5.69249500 | -1.49917700 |
| C | 3.33444800  | -6.40007500 | -2.65222900 |
| C | -4.29749600 | -2.43378100 | 0.69077600  |
| C | -4.64451900 | -2.12584300 | 2.01133900  |
| C | -5.03566300 | -3.43563200 | 0.05281600  |
| C | -5.65143700 | -2.80710200 | 2.68844700  |
| C | -6.05684200 | -4.12287300 | 0.70621500  |
| C | -6.36391600 | -3.80769100 | 2.02958900  |
| C | -3.12135200 | 4.18593900  | -1.26321400 |
| C | -3.89796200 | 4.73396100  | -0.23688900 |
| C | -3.07929400 | 4.87906700  | -2.47866100 |
| C | -4.62196900 | 5.91066300  | -0.41231900 |
| C | -3.79186400 | 6.05986300  | -2.67480800 |
| C | -4.56687100 | 6.57488200  | -1.63673600 |
| C | 3.63365600  | 2.58890100  | -0.44654500 |
| C | 3.76142400  | 2.96147800  | 0.89827900  |
| C | 4.68807100  | 2.91681300  | -1.30145700 |
| C | 4.88939600  | 3.61889800  | 1.37839100  |
| C | 5.83323900  | 3.56289100  | -0.84089100 |
| C | 5.93408600  | 3.91435300  | 0.50484700  |
| H | 0.90713800  | -2.63641200 | 1.40713000  |
| H | -2.82146800 | -2.11462200 | 4.90451200  |
| H | 5.33071600  | -0.05564700 | 1.55693000  |
| N | 5.35598500  | 1.30033100  | 3.83168300  |
| O | 6.31372800  | 1.48836500  | 3.07555000  |
| O | 5.25651200  | 1.78324500  | 4.95848800  |
| F | -3.98227200 | -1.16475500 | 2.66815200  |
| F | -5.92686700 | -2.51162300 | 3.96326200  |
| F | -7.33467000 | -4.46561100 | 2.66411800  |
| F | -6.74388200 | -5.07804000 | 0.07332000  |
| F | -4.76202900 | -3.76408600 | -1.21561500 |
| F | -3.95667700 | 4.12721300  | 0.95610700  |
| F | -5.35800500 | 6.40999500  | 0.58552100  |
| F | -5.25466500 | 7.70365300  | -1.81429300 |
| F | -3.73963900 | 6.69814800  | -3.84709900 |
| F | -2.33823300 | 4.40922300  | -3.48679500 |
| F | 2.78314300  | 2.67430500  | 1.76695000  |
| F | 4.97184200  | 3.95743900  | 2.66589700  |
| F | 7.02271000  | 4.53814400  | 0.95020700  |
| F | 6.82874700  | 3.85656800  | -1.68337100 |
| F | 4.61886900  | 2.59821700  | -2.60358000 |
| F | 3.31631800  | -3.86670400 | -0.06534100 |
| F | 4.63898900  | -6.14831100 | -0.69501500 |

|   |            |             |             |
|---|------------|-------------|-------------|
| F | 3.97911400 | -7.52747900 | -2.95482300 |
| F | 1.99688500 | -6.61481100 | -4.58778300 |
| F | 0.67812000 | -4.32616000 | -3.97085800 |

**cat3/b9**

|    |             |             |             |
|----|-------------|-------------|-------------|
| C  | 1.55996200  | -1.83965800 | -1.13518500 |
| C  | 1.72281200  | -3.26624200 | -1.26352800 |
| C  | 0.53657100  | -3.83507200 | -0.93483700 |
| C  | -0.39278200 | -2.76068700 | -0.68454200 |
| N  | 0.26184600  | -1.55328200 | -0.77004200 |
| H  | 2.63784400  | -3.76936900 | -1.53208000 |
| H  | 0.30622100  | -4.88703700 | -0.88200900 |
| C  | -3.58719900 | 0.10992500  | -0.68141300 |
| C  | -4.67574200 | -0.83896200 | -0.73304600 |
| C  | -4.12717300 | -2.07538900 | -0.62183300 |
| C  | -2.69544900 | -1.89169300 | -0.54666000 |
| N  | -2.39305600 | -0.56198100 | -0.59451500 |
| H  | -5.72048800 | -0.58472100 | -0.83290600 |
| H  | -4.63443500 | -3.02902000 | -0.62524300 |
| C  | 1.58738700  | 2.37131400  | -0.36588700 |
| C  | 3.00265900  | 2.58352100  | -0.55391800 |
| C  | 3.52691300  | 1.39882500  | -0.96211100 |
| C  | 2.43951800  | 0.44957500  | -0.99568300 |
| N  | 1.27345300  | 1.06250300  | -0.62478000 |
| H  | 3.52162900  | 3.51774400  | -0.39723100 |
| H  | 4.56058900  | 1.17327300  | -1.17964900 |
| C  | -0.70264600 | 3.24444700  | -0.10368900 |
| C  | -1.64773500 | 4.32186000  | 0.07055900  |
| C  | -2.88182700 | 3.80351600  | -0.15977300 |
| C  | -2.70131400 | 2.39713900  | -0.43804900 |
| N  | -1.37115100 | 2.08404100  | -0.40330800 |
| H  | -1.39183200 | 5.34062300  | 0.32248800  |
| H  | -3.83374200 | 4.31270400  | -0.12076000 |
| C  | 2.58505500  | -0.90756700 | -1.30657600 |
| C  | -3.75074800 | 1.49378000  | -0.63386800 |
| C  | -1.76759400 | -2.93921300 | -0.51668400 |
| C  | 0.68316100  | 3.38939600  | -0.05235000 |
| Fe | -0.55136500 | 0.24088000  | -0.54707100 |
| Cl | -0.68721600 | 0.47192100  | -2.83685000 |
| O  | -0.61892000 | 0.26383200  | 1.12417100  |
| H  | 0.00502600  | -0.66290300 | 1.88366200  |
| C  | 2.07604100  | -5.09921100 | 2.12430500  |
| C  | 0.69373200  | -4.97323500 | 2.28955600  |
| C  | 0.11007500  | -3.72309100 | 2.51944600  |

|   |             |             |             |
|---|-------------|-------------|-------------|
| C | 0.92050200  | -2.58569000 | 2.59331400  |
| C | 2.31648300  | -2.72245300 | 2.38783900  |
| C | 2.89745300  | -3.96758000 | 2.16753800  |
| H | 2.51571000  | -6.07784600 | 1.95315500  |
| H | -0.96193900 | -3.65169700 | 2.61738400  |
| H | 3.96899600  | -4.06013600 | 2.02472300  |
| C | 0.58212300  | -1.15097800 | 2.86995400  |
| C | 1.90802800  | -0.45070400 | 2.75800800  |
| C | 2.20671000  | 0.91565000  | 2.74985500  |
| C | 3.50015600  | 1.33631400  | 2.45193600  |
| C | 4.47187000  | 0.38710800  | 2.13163000  |
| C | 4.21416300  | -0.98363100 | 2.14172400  |
| C | 2.92097400  | -1.39078600 | 2.44471900  |
| H | 1.44204900  | 1.66168700  | 2.90306000  |
| H | 4.98944700  | -1.67979600 | 1.85631300  |
| C | -0.42008700 | -0.82042700 | 4.02676000  |
| C | -1.84453700 | -1.31215300 | 3.68267700  |
| C | 0.07805100  | -1.51625900 | 5.31431400  |
| C | -0.51052700 | 0.69558100  | 4.29243800  |
| H | -2.16368200 | -0.93906100 | 2.70429800  |
| H | -1.92909900 | -2.39970700 | 3.68603700  |
| H | -2.54832200 | -0.93930700 | 4.43545500  |
| H | 1.09049400  | -1.18376100 | 5.57131300  |
| H | -0.58524300 | -1.26705700 | 6.15119900  |
| H | 0.09392400  | -2.60464700 | 5.20193300  |
| H | -1.29165400 | 0.88288100  | 5.03770800  |
| H | 0.42348400  | 1.09409100  | 4.69777300  |
| H | -0.77195800 | 1.24346300  | 3.38204900  |
| C | -2.30352200 | -4.32280700 | -0.37703900 |
| C | -2.23919000 | -5.25907800 | -1.41476000 |
| C | -2.93263700 | -4.73037700 | 0.80423400  |
| C | -2.73487300 | -6.55363500 | -1.27189600 |
| C | -3.43597900 | -6.01703100 | 0.97289500  |
| C | -3.33550100 | -6.93328600 | -0.07303000 |
| C | -5.13036600 | 2.05013000  | -0.71621400 |
| C | -6.06246800 | 1.85668400  | 0.30788100  |
| C | -5.53250500 | 2.81190000  | -1.81837800 |
| C | -7.34953100 | 2.38396000  | 0.23921800  |
| C | -6.81327100 | 3.35365900  | -1.90637400 |
| C | -7.72359100 | 3.13631300  | -0.87319800 |
| C | 1.24052500  | 4.73552700  | 0.26540200  |
| C | 1.87073300  | 4.99099700  | 1.48529500  |
| C | 1.17077300  | 5.78888500  | -0.65199500 |
| C | 2.41873000  | 6.23392400  | 1.78998800  |

|   |             |             |             |
|---|-------------|-------------|-------------|
| C | 1.70531700  | 7.04426900  | -0.36949900 |
| C | 2.33307000  | 7.26494100  | 0.85578100  |
| C | 3.90165300  | -1.33412900 | -1.86193700 |
| C | 4.76253000  | -2.23613400 | -1.23064000 |
| C | 4.35366900  | -0.78227500 | -3.07074700 |
| C | 6.01191600  | -2.56604900 | -1.74661100 |
| C | 5.59942500  | -1.09528100 | -3.60853600 |
| C | 6.43430200  | -1.99041800 | -2.94196600 |
| H | 0.05948700  | -5.85410800 | 2.23615000  |
| H | 3.74126900  | 2.38828300  | 2.40283400  |
| N | 5.76948800  | 0.85229600  | 1.63283400  |
| O | 6.01380400  | 2.05826300  | 1.69017100  |
| O | 6.52966700  | 0.01191600  | 1.14264600  |
| F | -5.72494100 | 1.14582500  | 1.39269700  |
| F | -8.22140500 | 2.18174800  | 1.23259800  |
| F | -8.95288500 | 3.64933700  | -0.94783300 |
| F | -7.17480700 | 4.07519200  | -2.97123700 |
| F | -4.67611500 | 3.03838100  | -2.81954300 |
| F | 1.96218300  | 4.02059600  | 2.41225700  |
| F | 3.01383900  | 6.44450800  | 2.96723900  |
| F | 2.84830500  | 8.46266400  | 1.13530400  |
| F | 1.62472600  | 8.03359300  | -1.26324900 |
| F | 0.57633700  | 5.60215700  | -1.83534500 |
| F | 4.39492700  | -2.83716500 | -0.08533000 |
| F | 6.79988300  | -3.43117400 | -1.10127900 |
| F | 7.62741700  | -2.29926100 | -3.45006000 |
| F | 5.99642300  | -0.54649400 | -4.75970400 |
| F | 3.58508900  | 0.08458700  | -3.73775800 |
| F | -3.06587700 | -3.86592900 | 1.82540300  |
| F | -4.01749000 | -6.37432400 | 2.12201200  |
| F | -3.81441000 | -8.16938000 | 0.07318700  |
| F | -2.64859900 | -7.42699800 | -2.27911800 |
| F | -1.68277500 | -4.92508800 | -2.58507200 |

**cat3/b10**

|   |             |             |             |
|---|-------------|-------------|-------------|
| C | 2.63784200  | 1.07318800  | -0.62136400 |
| C | 3.95415100  | 0.47801700  | -0.66943700 |
| C | 3.78484900  | -0.81403100 | -1.04948200 |
| C | 2.36369700  | -1.02651700 | -1.18858000 |
| N | 1.68580200  | 0.13209400  | -0.91043800 |
| H | 4.87864800  | 0.97819000  | -0.42247100 |
| H | 4.54842800  | -1.56095800 | -1.20734400 |
| C | -1.74421300 | -2.25252700 | -1.08232700 |
| C | -1.52381900 | -3.63792100 | -1.41808200 |



|    |             |             |             |
|----|-------------|-------------|-------------|
| C  | -0.20834000 | -3.76411600 | -1.72965300 |
| C  | 0.39679400  | -2.47345100 | -1.52053400 |
| N  | -0.56102100 | -1.56144700 | -1.15491300 |
| H  | -2.27625800 | -4.40970900 | -1.42710900 |
| H  | 0.31903300  | -4.65965300 | -2.02338700 |
| C  | -1.00866400 | 3.34376900  | -0.80227800 |
| C  | -0.41513600 | 4.65119900  | -0.63399900 |
| C  | 0.91101700  | 4.45675100  | -0.41957700 |
| C  | 1.13959000  | 3.03123300  | -0.48292300 |
| N  | -0.04249600 | 2.37923500  | -0.71457100 |
| H  | -0.95360500 | 5.58721600  | -0.65812400 |
| H  | 1.67501700  | 5.20290900  | -0.25751700 |
| C  | -2.96918900 | 1.85179100  | -0.93551500 |
| C  | -4.39337000 | 1.60788700  | -0.87112300 |
| C  | -4.55616400 | 0.26832900  | -0.72421300 |
| C  | -3.23511600 | -0.31694500 | -0.76059700 |
| N  | -2.29252400 | 0.66158400  | -0.89278900 |
| H  | -5.15960200 | 2.36707000  | -0.91953900 |
| H  | -5.47954500 | -0.28712400 | -0.64383100 |
| C  | 2.39695000  | 2.43081300  | -0.38433100 |
| C  | -2.98978000 | -1.69267600 | -0.77392700 |
| C  | 1.77437400  | -2.24314000 | -1.53653800 |
| C  | -2.38162800 | 3.11835200  | -0.94689100 |
| Fe | -0.30314500 | 0.38782900  | -0.85042000 |
| Cl | -0.28784500 | 0.68575200  | -3.15793100 |
| O  | -0.39173100 | 0.34789600  | 0.81316500  |
| H  | -0.11482800 | -0.70430100 | 1.63550900  |
| C  | -2.93959900 | -0.04748300 | 5.21781000  |
| C  | -1.84117300 | 0.81028600  | 5.08835200  |
| C  | -0.74925900 | 0.45938600  | 4.28749300  |
| C  | -0.76328900 | -0.76970200 | 3.62895300  |
| C  | -1.86568600 | -1.64334100 | 3.77848200  |
| C  | -2.95814400 | -1.28401400 | 4.56280400  |
| H  | -3.78424300 | 0.24800800  | 5.83389900  |
| H  | -1.83689300 | 1.76265700  | 5.61080000  |
| H  | 0.09316700  | 1.13550400  | 4.19304500  |
| H  | -3.81394500 | -1.94676400 | 4.65578600  |
| C  | 0.20531500  | -1.36728500 | 2.64812200  |
| C  | -0.33159500 | -2.73552200 | 2.39254100  |
| C  | 0.17792700  | -3.78339600 | 1.62439300  |
| C  | -0.57201900 | -4.95712400 | 1.49628700  |
| C  | -1.82785500 | -5.07520800 | 2.10165800  |
| C  | -2.35228800 | -4.02460200 | 2.86489200  |
| C  | -1.59819000 | -2.86434800 | 3.01738400  |

|   |             |             |             |
|---|-------------|-------------|-------------|
| H | 1.13468000  | -3.69159900 | 1.12425900  |
| H | -0.17963100 | -5.77923100 | 0.90487600  |
| H | -2.40153100 | -5.99019000 | 1.98036100  |
| H | -3.33241000 | -4.11242600 | 3.32598200  |
| C | 2.66509100  | -3.38629100 | -1.88557900 |
| C | 2.74434500  | -3.86507000 | -3.19697500 |
| C | 3.44318700  | -4.02991500 | -0.92011700 |
| C | 3.56630600  | -4.93865000 | -3.53568600 |
| C | 4.27374800  | -5.10190500 | -1.23265600 |
| C | 4.33493500  | -5.55566400 | -2.54976500 |
| C | -4.10928300 | -2.60200500 | -0.40547500 |
| C | -4.57500600 | -2.59690700 | 0.91447600  |
| C | -4.69957000 | -3.51483500 | -1.28353800 |
| C | -5.53194100 | -3.49970800 | 1.36444200  |
| C | -5.67591500 | -4.41503400 | -0.86090300 |
| C | -6.08763000 | -4.41308400 | 0.47164200  |
| C | -3.26940100 | 4.31163600  | -1.04336800 |
| C | -4.12067900 | 4.68294500  | 0.00166300  |
| C | -3.26155900 | 5.11775200  | -2.18648800 |
| C | -4.94443900 | 5.80256900  | -0.08532400 |
| C | -4.07275600 | 6.24550400  | -2.29323000 |
| C | -4.91740500 | 6.58627200  | -1.23789000 |
| C | 3.55578500  | 3.30137900  | -0.04150400 |
| C | 3.66491400  | 3.87374900  | 1.22864800  |
| C | 4.57598100  | 3.57853500  | -0.95662300 |
| C | 4.74801900  | 4.66576800  | 1.59478100  |
| C | 5.66985800  | 4.37124400  | -0.61660500 |
| C | 5.75429500  | 4.91682500  | 0.66341400  |
| C | 1.66937400  | -1.07535000 | 2.73306700  |
| C | 2.11109100  | 0.25558900  | 2.59039000  |
| C | 2.63333800  | -2.08565400 | 2.90014700  |
| C | 3.46222400  | 0.56120600  | 2.57804100  |
| H | 1.39096500  | 1.04553300  | 2.41565000  |
| C | 3.99411300  | -1.79465800 | 2.86567800  |
| H | 2.31678500  | -3.11197600 | 3.04154200  |
| C | 4.39110600  | -0.47201700 | 2.68190800  |
| H | 3.80463200  | 1.57686100  | 2.45738700  |
| H | 4.74092700  | -2.57413400 | 2.95332800  |
| N | 5.81186700  | -0.15684000 | 2.51996500  |
| O | 6.63230800  | -1.04298800 | 2.75507900  |
| O | 6.10439100  | 0.97992200  | 2.13161700  |
| F | -4.07732200 | -1.72176500 | 1.79441800  |
| F | -5.89438000 | -3.50736000 | 2.65453800  |
| F | -7.00864200 | -5.28379200 | 0.88789900  |

|   |             |             |             |
|---|-------------|-------------|-------------|
| F | -6.21704000 | -5.28175500 | -1.72249200 |
| F | -4.31407800 | -3.55767100 | -2.56594300 |
| F | -4.16118300 | 3.95061500  | 1.12292800  |
| F | -5.75182400 | 6.13316300  | 0.92776000  |
| F | -5.69991500 | 7.66279100  | -1.33031700 |
| F | -4.04830900 | 6.99836300  | -3.39678700 |
| F | -2.45523700 | 4.81505200  | -3.20879700 |
| F | 2.71517400  | 3.63163800  | 2.15083600  |
| F | 4.82847300  | 5.18146600  | 2.82430300  |
| F | 6.79603200  | 5.67841800  | 0.99666300  |
| F | 6.63074000  | 4.61929000  | -1.51034900 |
| F | 4.52068100  | 3.06917400  | -2.19272500 |
| F | 3.39331600  | -3.61834500 | 0.36016100  |
| F | 5.00230800  | -5.69784400 | -0.28400400 |
| F | 5.12432600  | -6.58336200 | -2.86431300 |
| F | 3.62418800  | -5.37760600 | -4.79554600 |
| F | 2.01196600  | -3.29597000 | -4.15859200 |

**cat3/b11**

|   |             |             |             |
|---|-------------|-------------|-------------|
| C | 2.60981100  | -0.75331200 | -0.85716700 |
| C | 3.38047800  | -1.95490000 | -1.08084700 |
| C | 2.51086700  | -2.90666300 | -1.51320100 |
| C | 1.19522500  | -2.31272400 | -1.48965900 |
| N | 1.28633400  | -1.00067000 | -1.10515800 |
| H | 4.44801200  | -2.04697400 | -0.95287500 |
| H | 2.73011200  | -3.92496500 | -1.80027800 |
| C | -2.84310500 | -1.13288800 | -0.71249200 |
| C | -3.43940200 | -2.44009100 | -0.85688600 |
| C | -2.47142000 | -3.26449400 | -1.34310000 |
| C | -1.26167700 | -2.48359700 | -1.43435800 |
| N | -1.51878200 | -1.18964500 | -1.06104100 |
| H | -4.47051000 | -2.68457400 | -0.65337300 |
| H | -2.55486500 | -4.31306600 | -1.59053900 |
| C | 0.82299100  | 3.13881600  | -0.97476200 |
| C | 2.04090000  | 3.90058100  | -0.80727600 |
| C | 3.03067400  | 3.00850900  | -0.54173800 |
| C | 2.43397200  | 1.69254300  | -0.59902500 |
| N | 1.09481200  | 1.80486100  | -0.85704000 |
| H | 2.11231700  | 4.97739000  | -0.85750400 |
| H | 4.07656200  | 3.20904100  | -0.36005600 |
| C | -1.63536200 | 2.97476400  | -0.98244200 |
| C | -2.95268300 | 3.55074200  | -0.81843900 |
| C | -3.78801800 | 2.53283300  | -0.48341000 |
| C | -3.00148300 | 1.31977000  | -0.51829400 |

|    |             |             |             |
|----|-------------|-------------|-------------|
| N  | -1.70894100 | 1.61574000  | -0.83482500 |
| H  | -3.19294800 | 4.59851900  | -0.92068600 |
| H  | -4.84769400 | 2.57930400  | -0.27650500 |
| C  | 3.15137500  | 0.49481700  | -0.52001100 |
| C  | -3.52507500 | 0.03349200  | -0.34480800 |
| C  | 0.00374800  | -3.01430500 | -1.69082200 |
| C  | -0.45066900 | 3.70468600  | -1.11210600 |
| Fe | -0.21441700 | 0.30254500  | -0.91834300 |
| Cl | -0.24192900 | 0.53278200  | -3.23028400 |
| O  | -0.19500600 | 0.26261700  | 0.73988600  |
| H  | -0.41646100 | -1.04978400 | 1.23747700  |
| C  | 3.42895600  | -1.29766900 | 3.59377100  |
| C  | 2.31498100  | -0.65353300 | 4.13252600  |
| C  | 2.05912000  | -2.52735900 | 2.06817800  |
| C  | 3.32104300  | -2.23827100 | 2.56876600  |
| H  | 2.45510400  | 0.07661400  | 4.92105800  |
| H  | 4.21195700  | -2.71253000 | 2.17750600  |
| C  | -0.40541100 | -2.04064000 | 1.94381800  |
| C  | 0.92591700  | -1.87011300 | 2.56964100  |
| C  | 1.05483200  | -0.92615700 | 3.61096400  |
| C  | -0.17429500 | -0.16447200 | 4.05809800  |
| H  | -0.47490700 | -2.88620800 | 1.25571400  |
| H  | -0.05710300 | 0.19541300  | 5.08630900  |
| H  | -0.24770100 | 0.73042900  | 3.41787700  |
| H  | 1.94598000  | -3.24784700 | 1.26606500  |
| C  | -1.57334100 | -1.85439100 | 2.82795200  |
| C  | -2.78694200 | -2.52568600 | 2.60518300  |
| C  | -3.87551300 | -2.30883200 | 3.44471000  |
| C  | -3.76319000 | -1.41026000 | 4.51215700  |
| C  | -2.55958100 | -0.73552800 | 4.73573800  |
| C  | -1.46318700 | -0.94050500 | 3.89977500  |
| H  | -2.86264400 | -3.21571700 | 1.76984700  |
| H  | -4.80971400 | -2.83590300 | 3.27143800  |
| H  | -4.61515200 | -1.22563800 | 5.15928100  |
| H  | -2.47888400 | -0.03406900 | 5.56249400  |
| C  | 0.08837400  | -4.45801200 | -2.04948200 |
| C  | -0.18688000 | -4.90599700 | -3.34361300 |
| C  | 0.42622900  | -5.41635200 | -1.09135800 |
| C  | -0.11609400 | -6.25833300 | -3.67674900 |
| C  | 0.50757400  | -6.77095400 | -1.39882200 |
| C  | 0.23396500  | -7.19026500 | -2.70086700 |
| C  | 4.57697100  | 0.57426400  | -0.09550900 |
| C  | 4.89578800  | 0.94260800  | 1.21590200  |
| C  | 5.64346200  | 0.31403000  | -0.96135100 |

|   |             |             |             |
|---|-------------|-------------|-------------|
| C | 6.21066200  | 1.03410600  | 1.66249900  |
| C | 6.96773100  | 0.39141000  | -0.53724300 |
| C | 7.25117000  | 0.75255900  | 0.77957100  |
| C | -4.86177000 | -0.07997000 | 0.29794000  |
| C | -4.98491000 | 0.27778600  | 1.64660800  |
| C | -6.00609800 | -0.55256700 | -0.34847000 |
| C | -6.18380000 | 0.13403000  | 2.33747700  |
| C | -7.21982900 | -0.69577100 | 0.32093000  |
| C | -7.30564400 | -0.35439600 | 1.67021700  |
| C | -0.53173700 | 5.18164200  | -1.28881300 |
| C | -0.12177000 | 5.77802400  | -2.48615100 |
| C | -0.98342200 | 6.02594700  | -0.26991800 |
| C | -0.17076000 | 7.15829900  | -2.67085000 |
| C | -1.04541900 | 7.40748500  | -0.43394900 |
| C | -0.63590500 | 7.97356300  | -1.64027400 |
| N | 4.76261600  | -0.93233500 | 4.08111700  |
| O | 5.73568700  | -1.36532700 | 3.45529900  |
| O | 4.83996300  | -0.20695800 | 5.07067000  |
| F | 0.67623600  | -5.03362000 | 0.17535800  |
| F | 0.83420100  | -7.66649000 | -0.46220300 |
| F | 0.30502200  | -8.48560900 | -3.01026400 |
| F | -0.37913900 | -6.66564300 | -4.92095700 |
| F | -0.52761100 | -4.03123700 | -4.29320400 |
| F | -3.92445000 | 0.75196300  | 2.30742800  |
| F | -6.26046900 | 0.44408900  | 3.63692900  |
| F | -8.46094800 | -0.49789500 | 2.32233100  |
| F | -8.29923900 | -1.15542500 | -0.31987200 |
| F | -5.94995400 | -0.89787000 | -1.64238500 |
| F | -1.37139900 | 5.50874700  | 0.90418800  |
| F | -1.48413900 | 8.19099500  | 0.55661000  |
| F | -0.68825400 | 9.29595600  | -1.80760200 |
| F | 0.22234900  | 7.70395100  | -3.82522800 |
| F | 0.33433100  | 5.01860100  | -3.48654400 |
| F | 3.91490700  | 1.21445900  | 2.09033900  |
| F | 6.47231200  | 1.38321300  | 2.92121800  |
| F | 8.51681100  | 0.83156300  | 1.18992600  |
| F | 7.96653700  | 0.13138500  | -1.38692600 |
| F | 5.40336100  | -0.02679800 | -2.23566300 |

**cat3/b12**

|   |            |             |             |
|---|------------|-------------|-------------|
| C | 2.44964400 | -1.23708200 | -0.89418700 |
| C | 2.98316200 | -2.55917000 | -1.12865400 |
| C | 1.94517400 | -3.33595400 | -1.53962200 |
| C | 0.76203400 | -2.50879600 | -1.49696800 |

|    |             |             |             |
|----|-------------|-------------|-------------|
| N  | 1.09967400  | -1.23567500 | -1.12166200 |
| H  | 4.01909300  | -2.84421700 | -1.02656700 |
| H  | 1.96916900  | -4.37647100 | -1.82956300 |
| C  | -2.99948000 | -0.58629800 | -0.76050800 |
| C  | -3.82938600 | -1.75855900 | -0.91250100 |
| C  | -3.02364000 | -2.75747200 | -1.36600600 |
| C  | -1.68727700 | -2.21812100 | -1.43868200 |
| N  | -1.70345300 | -0.89439900 | -1.08111100 |
| H  | -4.89310300 | -1.80206100 | -0.73572100 |
| H  | -3.29862200 | -3.77401900 | -1.60804100 |
| C  | 1.41466300  | 2.92044700  | -0.94635200 |
| C  | 2.75489500  | 3.44063700  | -0.78551200 |
| C  | 3.56405600  | 2.37687500  | -0.54639000 |
| C  | 2.73121500  | 1.19564800  | -0.61124000 |
| N  | 1.43303900  | 1.55772900  | -0.84736000 |
| H  | 3.02481700  | 4.48597400  | -0.82271100 |
| H  | 4.63107200  | 2.37728100  | -0.37788100 |
| C  | -1.02996200 | 3.22107700  | -0.95435500 |
| C  | -2.21689900 | 4.03535100  | -0.80251600 |
| C  | -3.23631000 | 3.19069600  | -0.50059000 |
| C  | -2.69256900 | 1.85081400  | -0.54104500 |
| N  | -1.36031000 | 1.89908900  | -0.82816600 |
| H  | -2.25236600 | 5.11074700  | -0.89276600 |
| H  | -4.27212500 | 3.43475100  | -0.31276700 |
| C  | 3.21657900  | -0.11387500 | -0.55675800 |
| C  | -3.45676100 | 0.68807800  | -0.40043800 |
| C  | -0.54154200 | -2.97922700 | -1.67925900 |
| C  | 0.27073100  | 3.71774600  | -1.07058900 |
| Fe | -0.13759800 | 0.32565800  | -0.91563300 |
| Cl | -0.11362800 | 0.57074600  | -3.23398800 |
| O  | -0.13626300 | 0.24682900  | 0.73574000  |
| H  | -0.65744300 | -1.02379100 | 1.25182100  |
| C  | 3.03652900  | -1.76748800 | 3.68440400  |
| C  | 1.98405200  | -1.09738800 | 4.29647400  |
| C  | 1.57932800  | -2.73925900 | 2.05170300  |
| C  | 2.85456200  | -2.60298100 | 2.57754400  |
| H  | 2.14746300  | -0.46204500 | 5.15694600  |
| H  | 3.70626700  | -3.10702900 | 2.14031800  |
| C  | -0.82803100 | -1.98070300 | 1.95807900  |
| C  | 0.49330000  | -2.05152300 | 2.60985400  |
| C  | 0.71353100  | -1.25240100 | 3.74792200  |
| H  | -1.04673600 | -2.80380500 | 1.27329400  |
| H  | 1.41305700  | -3.36139900 | 1.18001500  |
| C  | -1.92726700 | -1.59247900 | 2.85909400  |

|   |             |             |             |
|---|-------------|-------------|-------------|
| C | -3.27973800 | -1.85580600 | 2.59216400  |
| C | -4.27594700 | -1.37377200 | 3.43226300  |
| C | -3.93759000 | -0.59259000 | 4.54945700  |
| C | -2.60425400 | -0.33031600 | 4.84647600  |
| C | -1.61152000 | -0.84073800 | 4.00892300  |
| H | -3.52934000 | -2.43747700 | 1.71010400  |
| H | -5.31854100 | -1.58856900 | 3.21787800  |
| H | -4.71961900 | -0.18729600 | 5.18349400  |
| H | -2.31314500 | 0.25603000  | 5.71137000  |
| C | -0.72810800 | -4.42153400 | -2.00320800 |
| C | -1.12862600 | -4.84261500 | -3.27354500 |
| C | -0.53123000 | -5.40367100 | -1.02961600 |
| C | -1.31650800 | -6.19270600 | -3.56834600 |
| C | -0.70803000 | -6.75716300 | -1.29896000 |
| C | -1.10295900 | -7.15011700 | -2.57781100 |
| C | 4.64049800  | -0.29788000 | -0.15908300 |
| C | 5.04944500  | 0.00850200  | 1.14394300  |
| C | 5.62667400  | -0.73212800 | -1.05019500 |
| C | 6.37434800  | -0.10963600 | 1.55399200  |
| C | 6.95587100  | -0.87591000 | -0.66028900 |
| C | 7.32988500  | -0.56144800 | 0.64570200  |
| C | -4.81023200 | 0.82787900  | 0.20034400  |
| C | -4.91231200 | 1.20389700  | 1.54614400  |
| C | -6.00052000 | 0.57480300  | -0.48608400 |
| C | -6.13988000 | 1.27848800  | 2.19674800  |
| C | -7.24181700 | 0.65616400  | 0.14181100  |
| C | -7.30958100 | 1.00515300  | 1.49021700  |
| C | 0.46838100  | 5.18508800  | -1.23462100 |
| C | 0.99176900  | 5.70206000  | -2.42490100 |
| C | 0.17440200  | 6.09290300  | -0.21260800 |
| C | 1.20381000  | 7.06805500  | -2.59974100 |
| C | 0.37342100  | 7.46263300  | -0.36709600 |
| C | 0.89132200  | 7.94951500  | -1.56615500 |
| N | 4.39592100  | -1.57205800 | 4.20526300  |
| O | 5.31923700  | -2.11919500 | 3.59703000  |
| O | 4.53530800  | -0.87701600 | 5.20839600  |
| O | -0.31062900 | -0.57696000 | 4.35911200  |
| F | -0.16787400 | -5.04396400 | 0.21682200  |
| F | -0.51244400 | -7.67509300 | -0.34736400 |
| F | -1.27870500 | -8.44380500 | -2.85061700 |
| F | -1.69643300 | -6.57396400 | -4.79046700 |
| F | -1.34373500 | -3.94307000 | -4.23669200 |
| F | -3.80760400 | 1.47527400  | 2.24819600  |
| F | -6.19955300 | 1.58794400  | 3.49788900  |

|   |             |             |             |
|---|-------------|-------------|-------------|
| F | -8.49267200 | 1.07230100  | 2.10370400  |
| F | -8.36493600 | 0.40352500  | -0.53761000 |
| F | -5.96626300 | 0.22582200  | -1.77940500 |
| F | -0.31380900 | 5.65116500  | 0.95455100  |
| F | 0.08104300  | 8.30882500  | 0.62603000  |
| F | 1.08844600  | 9.25954300  | -1.72373900 |
| F | 1.70126000  | 7.53771100  | -3.74746400 |
| F | 1.30555600  | 4.87684600  | -3.42807500 |
| F | 4.14973900  | 0.44030200  | 2.04133000  |
| F | 6.72935900  | 0.20766800  | 2.79799800  |
| F | 8.60287300  | -0.68761300 | 1.02150800  |
| F | 7.87579400  | -1.29879200 | -1.53326400 |
| F | 5.30242300  | -1.02425300 | -2.31765200 |

**cat3/b13**

|   |             |             |             |
|---|-------------|-------------|-------------|
| C | 0.53984100  | 3.02189000  | -0.88380800 |
| C | 1.25581500  | 4.20427400  | -0.47169100 |
| C | 2.37435200  | 3.78226900  | 0.17820100  |
| C | 2.36931000  | 2.33960400  | 0.12908600  |
| N | 1.23442900  | 1.90503500  | -0.50620300 |
| H | 0.93108900  | 5.21993800  | -0.64638900 |
| H | 3.15506800  | 4.38682000  | 0.61658000  |
| C | 3.08080500  | -1.83942400 | -0.50066700 |
| C | 4.43609700  | -1.87365200 | 0.00374800  |
| C | 4.69636700  | -0.64590700 | 0.52227700  |
| C | 3.52421400  | 0.16700700  | 0.28375900  |
| N | 2.56002100  | -0.58555500 | -0.32835100 |
| H | 5.08001800  | -2.74102500 | -0.00549400 |
| H | 5.60243400  | -0.31041600 | 1.00463200  |
| C | -2.21864900 | -0.18242300 | -1.45025800 |
| C | -3.33069800 | 0.60744100  | -1.92582900 |
| C | -2.86512700 | 1.87258800  | -2.11143300 |
| C | -1.48963900 | 1.88248300  | -1.67786100 |
| N | -1.11292100 | 0.60915700  | -1.31872200 |
| H | -4.32094900 | 0.23271100  | -2.13329800 |
| H | -3.40677400 | 2.73063200  | -2.48275000 |
| C | -1.10452300 | -2.35401800 | -1.14152300 |
| C | -1.09916100 | -3.79551300 | -1.25768300 |
| C | 0.20249000  | -4.17843900 | -1.31805100 |
| C | 1.00105700  | -2.98170900 | -1.15337700 |
| N | 0.18122500  | -1.89101400 | -1.08394900 |
| H | -1.98237500 | -4.41294500 | -1.33877100 |
| H | 0.59331900  | -5.17790000 | -1.43745100 |
| C | -0.71948200 | 3.02852700  | -1.49322200 |



|    |             |             |             |
|----|-------------|-------------|-------------|
| C  | 2.38571000  | -2.96337800 | -0.95513900 |
| C  | 3.42318400  | 1.53233700  | 0.56768100  |
| C  | -2.25257300 | -1.56679900 | -1.21923100 |
| Fe | 0.70269100  | 0.01029700  | -0.76663900 |
| Cl | 1.36604700  | 0.13652200  | -2.97760000 |
| O  | 0.29345400  | -0.20431500 | 0.83431100  |
| C  | -3.01200500 | -2.07172700 | 5.17790600  |
| C  | -4.07871900 | -1.73884300 | 4.36950900  |
| C  | -3.93649200 | -0.72244500 | 3.39144600  |
| C  | -2.65965100 | -0.07429500 | 3.24152600  |
| C  | -1.57872600 | -0.42922800 | 4.09945100  |
| C  | -1.77487800 | -1.41288000 | 5.05418000  |
| C  | -4.96593500 | -0.33642800 | 2.47738900  |
| C  | -2.46884300 | 0.91563400  | 2.21692900  |
| C  | -3.51659600 | 1.22001500  | 1.34726800  |
| C  | -4.75605000 | 0.59038000  | 1.47050000  |
| C  | -1.16346100 | 1.55698500  | 2.05073600  |
| C  | -0.30731300 | 1.61918000  | 3.30705100  |
| C  | -0.22020100 | 0.22139100  | 3.93263600  |
| H  | 0.38950700  | -0.41181600 | 3.27356600  |
| H  | 0.69344600  | 1.98755200  | 3.06405200  |
| H  | -3.13083300 | -2.85231900 | 5.92398000  |
| H  | -5.02330700 | -2.25171500 | 4.47591600  |
| H  | -0.95320100 | -1.68728200 | 5.71119300  |
| H  | -5.56805400 | 0.82726500  | 0.79398700  |
| H  | -3.36990600 | 1.96566700  | 0.57596300  |
| H  | -0.54573700 | 0.78654300  | 1.33773200  |
| H  | -1.20041800 | 2.47766800  | 1.46099100  |
| N  | -6.32155000 | -0.90018100 | 2.54695200  |
| O  | -6.78683500 | -1.18484100 | 3.64924000  |
| O  | -6.93390000 | -1.02434100 | 1.48154900  |
| C  | 4.52619300  | 2.19393400  | 1.31864200  |
| C  | 5.79827700  | 2.37673700  | 0.76723100  |
| C  | 4.31169300  | 2.68530800  | 2.61012400  |
| C  | 6.82091400  | 3.00821000  | 1.47214400  |
| C  | 5.31511000  | 3.32635300  | 3.33176700  |
| C  | 6.57575000  | 3.48603700  | 2.75852500  |
| C  | 3.15687000  | -4.22598500 | -1.12959300 |
| C  | 4.08684900  | -4.35069000 | -2.16768800 |
| C  | 3.01480700  | -5.31179800 | -0.26024000 |
| C  | 4.83741200  | -5.51131300 | -2.34441000 |
| C  | 3.74923000  | -6.48401700 | -0.42149300 |
| C  | 4.66479600  | -6.58142100 | -1.46810700 |
| C  | -3.56474500 | -2.22902500 | -0.99020300 |

|   |             |             |             |
|---|-------------|-------------|-------------|
| C | -4.55381800 | -2.39176900 | -1.96144800 |
| C | -3.85896400 | -2.68005900 | 0.30285800  |
| C | -5.79428500 | -2.95112600 | -1.65976400 |
| C | -5.09173200 | -3.23143500 | 0.62798500  |
| C | -6.06709000 | -3.36571300 | -0.35713600 |
| C | -1.31421500 | 4.34784000  | -1.84392800 |
| C | -0.85898600 | 5.08199700  | -2.94270700 |
| C | -2.33204500 | 4.91104200  | -1.07024500 |
| C | -1.40376300 | 6.32332100  | -3.26832700 |
| C | -2.89637000 | 6.14559300  | -1.37704300 |
| C | -2.42647900 | 6.85341700  | -2.48305600 |
| H | -0.75856600 | 2.32878300  | 4.01690500  |
| H | 0.29109200  | 0.26230000  | 4.90107100  |
| F | -2.78825000 | 4.25670000  | 0.01427300  |
| F | -3.87074300 | 6.65819300  | -0.61909100 |
| F | -2.95507900 | 8.03960500  | -2.78745600 |
| F | -0.95545400 | 7.00560700  | -4.32532700 |
| F | 0.12356600  | 4.59645100  | -3.70622000 |
| F | 3.10913300  | 2.54626300  | 3.19048500  |
| F | 5.07950700  | 3.78291900  | 4.56590900  |
| F | 7.54648100  | 4.09515200  | 3.44121600  |
| F | 8.02801400  | 3.16665000  | 0.92156700  |
| F | 6.05899800  | 1.93619600  | -0.46922300 |
| F | 2.15146300  | -5.24099500 | 0.76300500  |
| F | 3.59043100  | -7.50772200 | 0.42405700  |
| F | 5.37647900  | -7.69842300 | -1.62974200 |
| F | 5.71731000  | -5.60551700 | -3.34554400 |
| F | 4.27642300  | -3.33720600 | -3.01786000 |
| F | -2.94646600 | -2.55166600 | 1.27583000  |
| F | -5.35784300 | -3.58341500 | 1.89235800  |
| F | -7.25700100 | -3.87885000 | -0.05509900 |
| F | -6.72393200 | -3.08611100 | -2.61080300 |
| F | -4.32907700 | -1.98551700 | -3.22031500 |

**cat3/b14**

|   |             |             |             |
|---|-------------|-------------|-------------|
| C | -0.69092700 | -2.92695600 | -1.03024500 |
| C | -1.61034900 | -4.02638600 | -0.85979800 |
| C | -2.82957800 | -3.48097000 | -0.61915800 |
| C | -2.65648600 | -2.04697600 | -0.63446200 |
| N | -1.34740500 | -1.73597400 | -0.89638400 |
| H | -1.34927400 | -5.07275900 | -0.91303200 |
| H | -3.76627200 | -3.99327200 | -0.45518300 |
| C | -2.70794700 | 2.25407400  | -0.73995500 |
| C | -4.10466400 | 2.42590400  | -0.40818900 |

|    |             |             |             |
|----|-------------|-------------|-------------|
| C  | -4.62458400 | 1.18472500  | -0.24397200 |
| C  | -3.55048600 | 0.24678600  | -0.48249700 |
| N  | -2.39737200 | 0.91974900  | -0.78355100 |
| H  | -4.60863000 | 3.37504000  | -0.30175400 |
| H  | -5.63795900 | 0.91928700  | 0.01880900  |
| C  | 2.46040400  | -0.00875500 | -1.41670900 |
| C  | 3.52776100  | -0.94717800 | -1.66841500 |
| C  | 2.96903900  | -2.18386700 | -1.69939200 |
| C  | 1.56356000  | -2.01757900 | -1.43041500 |
| N  | 1.27007700  | -0.67926100 | -1.28207700 |
| H  | 4.56678500  | -0.69626200 | -1.80661800 |
| H  | 3.46011000  | -3.12862800 | -1.88168900 |
| C  | 1.56063800  | 2.28035100  | -1.29763300 |
| C  | 1.71426200  | 3.71228900  | -1.41932200 |
| C  | 0.46980300  | 4.24603600  | -1.35807100 |
| C  | -0.44861900 | 3.14583500  | -1.17044900 |
| N  | 0.23499500  | 1.95955100  | -1.17521100 |
| H  | 2.65278800  | 4.22633300  | -1.56565800 |
| H  | 0.18913800  | 5.28582200  | -1.43735600 |
| C  | 0.67440000  | -3.07844800 | -1.28200300 |
| C  | -1.81773700 | 3.30702300  | -0.94408500 |
| C  | -3.69009000 | -1.13874500 | -0.40455000 |
| C  | 2.62775100  | 1.38115500  | -1.32927800 |
| Fe | -0.54072800 | 0.11073200  | -0.97767800 |
| Cl | -0.90675000 | 0.10497000  | -3.26525200 |
| O  | -0.47658900 | 0.22636100  | 0.67713300  |
| H  | 0.46621400  | -0.24105700 | 1.59641400  |
| C  | 4.46096400  | 0.96719600  | 2.90984100  |
| C  | 5.10006900  | 0.14885400  | 1.97947700  |
| C  | 4.43713700  | -0.91008900 | 1.35855400  |
| C  | 3.09493600  | -1.11063000 | 1.63339200  |
| C  | 2.39864800  | -0.27636000 | 2.53184800  |
| C  | 3.11365300  | 0.74825900  | 3.18077600  |
| H  | 5.00546000  | 1.78361000  | 3.36784400  |
| H  | 4.96201600  | -1.53123900 | 0.64637200  |
| H  | 2.56474500  | -1.90640800 | 1.12636400  |
| H  | 2.60498200  | 1.39369700  | 3.88698400  |
| C  | 0.92340400  | -0.48576300 | 2.71020400  |
| C  | 0.18336300  | 0.56266000  | 3.50010300  |
| C  | 0.11760000  | 1.88126300  | 3.00279800  |
| C  | -0.47934700 | 0.26062000  | 4.69985100  |
| C  | -0.58888000 | 2.86507000  | 3.68690900  |
| C  | -1.17465500 | 1.25164900  | 5.39290100  |
| H  | -0.44141600 | -0.75158000 | 5.08979700  |

|   |             |             |             |
|---|-------------|-------------|-------------|
| C | -1.23718000 | 2.55259500  | 4.88707100  |
| H | -0.65431800 | 3.86590200  | 3.27118000  |
| H | -1.67197900 | 1.00563500  | 6.32721300  |
| H | -1.79261300 | 3.31857300  | 5.42152900  |
| C | -5.02187800 | -1.68931500 | -0.02578400 |
| C | -6.11867200 | -1.63233100 | -0.89033500 |
| C | -5.21763600 | -2.28760700 | 1.22211600  |
| C | -7.36188600 | -2.15009400 | -0.53128000 |
| C | -6.44684900 | -2.81921400 | 1.60112400  |
| C | -7.52349700 | -2.74726800 | 0.71805200  |
| C | 1.21695900  | -4.46493800 | -1.35173500 |
| C | 2.00919300  | -4.98178800 | -0.32255700 |
| C | 0.93661300  | -5.30778500 | -2.43138100 |
| C | 2.50692400  | -6.28131200 | -0.35691800 |
| C | 1.42148700  | -6.61310100 | -2.48784700 |
| C | 2.21029900  | -7.09916900 | -1.44611900 |
| C | -2.34508100 | 4.69652100  | -0.84009200 |
| C | -3.23368400 | 5.21785000  | -1.78546200 |
| C | -1.97635900 | 5.52957300  | 0.22159300  |
| C | -3.73620000 | 6.51371600  | -1.68382500 |
| C | -2.46110200 | 6.82873200  | 0.34208900  |
| C | -3.34608600 | 7.32086200  | -0.61638000 |
| C | 3.99600000  | 1.94572800  | -1.16886700 |
| C | 4.30680400  | 2.65180200  | 0.00310700  |
| C | 5.02590300  | 1.80420600  | -2.10432900 |
| C | 5.57795000  | 3.15539500  | 0.25635200  |
| C | 6.31196900  | 2.28390700  | -1.86569700 |
| C | 6.59265800  | 2.95720400  | -0.67765600 |
| C | 0.47304700  | -1.90839700 | 2.92257300  |
| C | -0.84223600 | -2.26638900 | 2.56471600  |
| C | 1.31465200  | -2.89713500 | 3.45991300  |
| C | -1.29053500 | -3.57388100 | 2.72271500  |
| H | -1.49729500 | -1.51554300 | 2.13566200  |
| C | 0.86360200  | -4.20710400 | 3.61865900  |
| H | 2.32643500  | -2.63902400 | 3.75530000  |
| C | -0.43702500 | -4.55154500 | 3.24563700  |
| H | -2.30306400 | -3.82664300 | 2.42862600  |
| H | 1.53052600  | -4.95752500 | 4.03408200  |
| H | -0.78571500 | -5.57404300 | 3.36389300  |
| H | 0.60186300  | 2.11623100  | 2.05997200  |
| N | 6.47475400  | 0.45337500  | 1.57461100  |
| O | 6.91941800  | -0.12815600 | 0.58052000  |
| O | 7.09337700  | 1.30165800  | 2.21801300  |
| F | 2.30999800  | -4.22109900 | 0.74189400  |

|   |             |             |             |
|---|-------------|-------------|-------------|
| F | 3.25898200  | -6.74820800 | 0.64524000  |
| F | 2.68005800  | -8.34695800 | -1.49017600 |
| F | 1.13858400  | -7.39863000 | -3.53083600 |
| F | 0.17581700  | -4.86777200 | -3.43908300 |
| F | -4.19830800 | -2.36188000 | 2.09468900  |
| F | -6.60295700 | -3.38792000 | 2.80088800  |
| F | -8.70849600 | -3.24891600 | 1.06998400  |
| F | -8.39532200 | -2.08279100 | -1.37532600 |
| F | -5.98938300 | -1.06413700 | -2.09390100 |
| F | -1.12302300 | 5.08311200  | 1.15756900  |
| F | -2.08900100 | 7.60178900  | 1.36754200  |
| F | -3.81889000 | 8.56385900  | -0.51124900 |
| F | -4.58298900 | 6.98762700  | -2.60225500 |
| F | -3.62770500 | 4.46311800  | -2.81661500 |
| F | 3.36373900  | 2.85204300  | 0.93719000  |
| F | 5.82941400  | 3.79664000  | 1.40114200  |
| F | 7.81777700  | 3.41960900  | -0.44447800 |
| F | 7.27341000  | 2.11403200  | -2.77635200 |
| F | 4.79595600  | 1.17923500  | -3.26830400 |

**cat3/b15**

|   |             |             |             |
|---|-------------|-------------|-------------|
| C | 1.03901200  | 3.29178500  | -0.70852300 |
| C | 1.98162600  | 4.28151500  | -0.24010900 |
| C | 3.20187600  | 3.68988700  | -0.24485300 |
| C | 3.00231700  | 2.32195700  | -0.66898800 |
| N | 1.68099000  | 2.10794200  | -0.95462800 |
| H | 1.73922100  | 5.29506000  | 0.04109600  |
| H | 4.15230100  | 4.12962600  | 0.01910700  |
| C | 2.83821500  | -1.92877800 | -1.27019100 |
| C | 4.25165600  | -2.18979800 | -1.10726500 |
| C | 4.85664300  | -0.98759500 | -0.94515100 |
| C | 3.81405800  | 0.01418200  | -0.99496000 |
| N | 2.60404400  | -0.58051100 | -1.23043200 |
| H | 4.70819700  | -3.16843400 | -1.12682800 |
| H | 5.90634100  | -0.78771700 | -0.78788100 |
| C | -2.10306800 | 0.69876500  | -2.12501400 |
| C | -3.09022500 | 1.73192900  | -2.32663100 |
| C | -2.53061300 | 2.90067700  | -1.91671800 |
| C | -1.19194800 | 2.59279900  | -1.48296800 |
| N | -0.93899300 | 1.25496800  | -1.65470400 |
| H | -4.08140900 | 1.58449600  | -2.72593600 |
| H | -2.97192500 | 3.88676900  | -1.92286800 |
| C | -1.37795900 | -1.66054800 | -2.08440000 |
| C | -1.64278100 | -3.08128100 | -2.13547100 |

|    |             |             |             |
|----|-------------|-------------|-------------|
| C  | -0.47024100 | -3.70914500 | -1.86917500 |
| C  | 0.52406000  | -2.67576400 | -1.68092000 |
| N  | -0.05099600 | -1.44144900 | -1.82239700 |
| H  | -2.60010300 | -3.53054000 | -2.35522500 |
| H  | -0.28629600 | -4.77155800 | -1.81662900 |
| C  | -0.31588400 | 3.53528100  | -0.93910300 |
| C  | 1.87244000  | -2.92651200 | -1.40915500 |
| C  | 4.01834200  | 1.36627000  | -0.71863200 |
| C  | -2.35303100 | -0.67514500 | -2.24564500 |
| Fe | 0.80938000  | 0.33225200  | -1.37581900 |
| Cl | 1.28403700  | 0.64709500  | -3.62769100 |
| O  | 0.61116600  | 0.02300800  | 0.23174800  |
| H  | -0.51308800 | 0.39846100  | 1.10378200  |
| C  | -1.02212800 | 0.37580400  | 2.20124100  |
| C  | -0.54175400 | -1.00963800 | 2.56520500  |
| C  | 0.30383100  | -1.27367200 | 3.65006300  |
| C  | -0.85706700 | -2.05883800 | 1.68016100  |
| C  | 0.81534300  | -2.55273300 | 3.85927900  |
| H  | 0.56675900  | -0.47325200 | 4.33328200  |
| C  | -0.35486100 | -3.33355400 | 1.87034800  |
| H  | -1.48230700 | -1.85603300 | 0.81918800  |
| C  | 0.48443300  | -3.56575400 | 2.96184600  |
| H  | 1.47144100  | -2.77075400 | 4.69288200  |
| H  | -0.57897400 | -4.13445000 | 1.17800300  |
| C  | -0.32742100 | 1.56388500  | 2.82955300  |
| C  | 1.05837300  | 1.74821300  | 2.65113700  |
| C  | -1.04882700 | 2.54200500  | 3.53298700  |
| C  | 1.69590000  | 2.87903300  | 3.15249900  |
| H  | 1.62020100  | 1.01571800  | 2.08247300  |
| C  | -0.40905100 | 3.67542100  | 4.03679800  |
| H  | -2.11746700 | 2.41510800  | 3.68006700  |
| C  | 0.96291700  | 3.85000900  | 3.84432000  |
| H  | 2.76043300  | 3.00757400  | 2.98319200  |
| H  | -0.98498100 | 4.42132400  | 4.57810800  |
| C  | -2.45460500 | 0.60194900  | 1.91062700  |
| C  | -3.57020100 | -0.14427700 | 2.20283900  |
| H  | -2.61251300 | 1.52226600  | 1.35608700  |
| C  | -3.54241200 | -1.27050100 | 3.17094800  |
| C  | -4.10725700 | -2.52039300 | 2.85781400  |
| C  | -2.94696900 | -1.09654800 | 4.43071400  |
| C  | -4.03709000 | -3.57417300 | 3.76607700  |
| H  | -4.58162500 | -2.66541700 | 1.89441400  |
| C  | -2.88633300 | -2.14889100 | 5.34171500  |
| H  | -2.52344700 | -0.12955500 | 4.68628900  |

|   |             |             |             |
|---|-------------|-------------|-------------|
| C | -3.42279400 | -3.39456100 | 5.00859300  |
| H | -4.45864800 | -4.54005800 | 3.50177800  |
| H | -2.41607400 | -1.99789100 | 6.30929000  |
| H | -3.36681900 | -4.21892100 | 5.71401400  |
| C | -4.87242400 | 0.21010400  | 1.59438200  |
| C | -6.09039000 | -0.18029400 | 2.18994100  |
| C | -4.93902200 | 0.93036300  | 0.38359200  |
| C | -7.31158500 | 0.11825100  | 1.59009200  |
| H | -6.07642400 | -0.72102900 | 3.12952600  |
| C | -6.15848100 | 1.23765800  | -0.20903900 |
| H | -4.02612900 | 1.22083200  | -0.11877600 |
| C | -7.35481400 | 0.82476400  | 0.38515000  |
| H | -8.23405900 | -0.20060200 | 2.06700800  |
| H | -6.17324900 | 1.78264700  | -1.14935600 |
| H | -8.30805600 | 1.04996300  | -0.08472800 |
| C | 5.39541700  | 1.79812600  | -0.34463300 |
| C | 6.41464300  | 1.90813800  | -1.29372100 |
| C | 5.71611000  | 2.09519100  | 0.98304100  |
| C | 7.70374700  | 2.30364100  | -0.94024700 |
| C | 6.99343600  | 2.50000800  | 1.35970500  |
| C | 7.99104900  | 2.60210000  | 0.39071500  |
| C | -0.87754200 | 4.86310500  | -0.57074900 |
| C | -1.82885100 | 4.97117200  | 0.45046700  |
| C | -0.48956500 | 6.04617700  | -1.20822300 |
| C | -2.35848700 | 6.19742500  | 0.84048100  |
| C | -1.00574900 | 7.28567600  | -0.83584000 |
| C | -1.94391800 | 7.35989000  | 0.19251600  |
| C | -3.77541000 | -1.10903900 | -2.35456300 |
| C | -4.38104300 | -1.75322400 | -1.26997600 |
| C | -4.59307400 | -0.82983400 | -3.45296500 |
| C | -5.72978600 | -2.08386900 | -1.25045900 |
| C | -5.95073300 | -1.14595300 | -3.45876400 |
| C | -6.52283500 | -1.77099600 | -2.35067800 |
| C | 2.30206900  | -4.33626600 | -1.18998800 |
| C | 2.73510700  | -4.75242100 | 0.07397000  |
| C | 2.28595100  | -5.29524500 | -2.20733900 |
| C | 3.12838400  | -6.06244600 | 0.33011000  |
| C | 2.66866800  | -6.61406300 | -1.97608400 |
| C | 3.09067200  | -6.99690800 | -0.70316000 |
| H | 1.45937900  | 4.73621100  | 4.23080400  |
| N | 1.05668700  | -4.90211000 | 3.14120600  |
| O | 0.79865800  | -5.75462200 | 2.28503100  |
| O | 1.76075400  | -5.10465000 | 4.12916200  |
| F | -2.25904900 | 3.87262300  | 1.09075000  |

|   |             |             |             |
|---|-------------|-------------|-------------|
| F | -3.25751300 | 6.26612100  | 1.82794000  |
| F | -2.44557300 | 8.54171100  | 0.55520600  |
| F | -0.61415100 | 8.39976900  | -1.46122700 |
| F | 0.40620300  | 6.00690400  | -2.20141900 |
| F | 4.77423900  | 1.99468500  | 1.93647800  |
| F | 7.27012300  | 2.78235800  | 2.63703500  |
| F | 9.22110100  | 2.98507800  | 0.73831800  |
| F | 8.66212500  | 2.40168600  | -1.86596100 |
| F | 6.16466900  | 1.62199200  | -2.57558700 |
| F | 2.78135500  | -3.87213800 | 1.08495500  |
| F | 3.53623900  | -6.42262700 | 1.54600100  |
| F | 3.46195900  | -8.25833300 | -0.47820700 |
| F | 2.64070000  | -7.51247400 | -2.96640500 |
| F | 1.88381000  | -4.95517900 | -3.43969900 |
| F | -3.65488400 | -2.04507400 | -0.17740800 |
| F | -6.26820100 | -2.66158500 | -0.16964900 |
| F | -7.82458300 | -2.06220300 | -2.34438100 |
| F | -6.70934900 | -0.85071900 | -4.51896900 |
| F | -4.08459000 | -0.20457000 | -4.52251900 |

**cat4/b1**

|   |             |             |             |
|---|-------------|-------------|-------------|
| C | -2.27262000 | 2.33027300  | 0.35805600  |
| C | -2.29771400 | 3.77705000  | 0.32823700  |
| C | -1.15421500 | 4.17824700  | -0.29464600 |
| C | -0.39660300 | 2.98270200  | -0.59047200 |
| N | -1.09873200 | 1.87838000  | -0.18374800 |
| H | -3.11028300 | 4.38631400  | 0.69986700  |
| H | -0.83052100 | 5.18371400  | -0.52644200 |
| C | 2.36824400  | -0.25591100 | -0.97458700 |
| C | 3.52675500  | 0.54128700  | -1.31792500 |
| C | 3.08517100  | 1.81465100  | -1.52544300 |
| C | 1.67151100  | 1.81997600  | -1.22264100 |
| N | 1.26319000  | 0.55123000  | -0.90819100 |
| H | 4.53579400  | 0.16240000  | -1.39439800 |
| H | 3.65789800  | 2.68811400  | -1.80629700 |
| C | -2.98415700 | -1.86143300 | -0.20337500 |
| C | -4.36350400 | -1.87382100 | 0.23830500  |
| C | -4.63431600 | -0.62781200 | 0.71622500  |
| C | -3.43710200 | 0.16431100  | 0.51919100  |
| N | -2.45625000 | -0.61347700 | -0.02875900 |
| H | -5.01225200 | -2.73834700 | 0.20138300  |
| H | -5.55643700 | -0.25438000 | 1.14045300  |
| C | -0.90952500 | -3.01538600 | -0.84331500 |
| C | -0.13236500 | -4.22226200 | -1.04576500 |



|    |             |             |             |
|----|-------------|-------------|-------------|
| C  | 1.17809700  | -3.85574900 | -0.99805300 |
| C  | 1.20299100  | -2.41716500 | -0.83101400 |
| N  | -0.07258100 | -1.94006200 | -0.74425800 |
| H  | -0.55258900 | -5.21034600 | -1.17482000 |
| H  | 2.05962500  | -4.47544800 | -1.09314300 |
| C  | -3.35472700 | 1.53981300  | 0.76009000  |
| C  | 2.37336200  | -1.65231500 | -0.84091200 |
| C  | 0.88970900  | 2.97630600  | -1.13883800 |
| C  | -2.29350800 | -2.99295800 | -0.64828200 |
| Fe | -0.57974700 | -0.03284400 | -0.41114700 |
| Cl | -1.20222400 | 0.13755800  | -2.72285400 |
| O  | -0.18652600 | -0.25134300 | 1.24859200  |
| H  | 0.33734400  | 0.64223500  | 1.79352500  |
| C  | 4.52504500  | 0.56350700  | 2.15199100  |
| C  | 4.68287400  | -0.24111900 | 3.28766800  |
| C  | 3.65275500  | -0.36235900 | 4.23201700  |
| C  | 2.45626900  | 0.29984000  | 4.01972800  |
| C  | 2.24285500  | 1.09054900  | 2.86042800  |
| C  | 3.32423900  | 1.21844000  | 1.95295900  |
| H  | 5.32570600  | 0.62330600  | 1.42549800  |
| H  | 3.80235100  | -0.99699700 | 5.09712600  |
| H  | 3.18220200  | 1.79763100  | 1.04968000  |
| C  | 0.94652900  | 1.64472000  | 2.53927900  |
| H  | 0.92229600  | 2.46150800  | 1.82060700  |
| H  | 0.23715000  | 1.75304400  | 3.36063500  |
| C  | 1.45272800  | 4.25696400  | -1.67374200 |
| C  | 2.06097400  | 5.20717600  | -0.83079100 |
| C  | 1.35561800  | 4.49858100  | -3.06078600 |
| C  | 2.55672900  | 6.39210500  | -1.38734600 |
| C  | 1.86160800  | 5.69653400  | -3.57591500 |
| C  | 2.46716700  | 6.65440100  | -2.75700600 |
| H  | 3.02455900  | 7.12662700  | -0.73357600 |
| H  | 1.77917200  | 5.88568700  | -4.64522700 |
| C  | -4.52204900 | 2.21991500  | 1.40697000  |
| C  | -5.60174800 | 2.68284300  | 0.62950600  |
| C  | -4.52397500 | 2.40432500  | 2.80330500  |
| C  | -6.67300200 | 3.31838600  | 1.26704800  |
| C  | -5.61352800 | 3.04371100  | 3.40388800  |
| C  | -6.69921000 | 3.50415400  | 2.65265600  |
| H  | -7.50575400 | 3.67981100  | 0.66552400  |
| H  | -5.61316800 | 3.18713200  | 4.48342300  |
| C  | -3.06467900 | -4.25816200 | -0.86288000 |
| C  | -3.65651600 | -4.49167000 | -2.12056200 |
| C  | -3.20477500 | -5.19986100 | 0.17401000  |

|   |             |             |             |
|---|-------------|-------------|-------------|
| C | -4.37562200 | -5.67456900 | -2.32023200 |
| C | -3.93213100 | -6.37143000 | -0.06580400 |
| C | -4.52124400 | -6.62787700 | -1.30710900 |
| H | -4.83401400 | -5.85509700 | -3.29150400 |
| H | -4.04176700 | -7.09862800 | 0.73728800  |
| C | 3.69107400  | -2.32995800 | -0.62758100 |
| C | 4.61983400  | -2.51907800 | -1.66690800 |
| C | 4.02048700  | -2.70897900 | 0.69532400  |
| C | 5.90679500  | -2.97774000 | -1.35103400 |
| C | 5.31405100  | -3.15663900 | 0.96756000  |
| C | 6.28218300  | -3.26346500 | -0.03673100 |
| H | 6.63441000  | -3.09841300 | -2.15238800 |
| H | 5.58527100  | -3.39603600 | 1.99394300  |
| C | 0.73274600  | 3.46928400  | -3.97597500 |
| H | 1.38632300  | 2.59465700  | -4.07991400 |
| H | -0.21124600 | 3.07954800  | -3.58112200 |
| H | 0.55703300  | 3.88457800  | -4.97426100 |
| C | 2.18418600  | 4.95685200  | 0.65495300  |
| H | 1.20126700  | 4.83222300  | 1.12268500  |
| H | 2.74590500  | 4.03838700  | 0.85789600  |
| H | 2.69813400  | 5.78467800  | 1.15482700  |
| C | 3.03762700  | 7.92522200  | -3.34503300 |
| H | 3.08195100  | 8.72866300  | -2.60095100 |
| H | 4.05977200  | 7.76910900  | -3.71713500 |
| H | 2.43761100  | 8.28010100  | -4.19116300 |
| C | 4.23987800  | -2.23715800 | -3.10482800 |
| H | 3.24704900  | -2.64039200 | -3.33291300 |
| H | 4.19122800  | -1.16271700 | -3.31534800 |
| H | 4.96330000  | -2.68397100 | -3.79568000 |
| C | 2.99078000  | -2.65011800 | 1.80025400  |
| H | 2.46296700  | -1.69235200 | 1.82466900  |
| H | 2.22183100  | -3.41815000 | 1.65034800  |
| H | 3.45768300  | -2.81683500 | 2.77464700  |
| C | 7.69235800  | -3.66827300 | 0.32322700  |
| H | 8.36083300  | -3.62588100 | -0.54391000 |
| H | 8.08803200  | -3.00024000 | 1.09826100  |
| H | 7.72939900  | -4.68915900 | 0.72632600  |
| C | -3.52259000 | -3.46772100 | -3.22387700 |
| H | -4.00298800 | -2.52248200 | -2.94569500 |
| H | -2.47355100 | -3.21736600 | -3.41563800 |
| H | -3.97500800 | -3.82613200 | -4.15476400 |
| C | -5.27411100 | -7.91460900 | -1.56007300 |
| H | -6.13166800 | -7.75410600 | -2.22420900 |
| H | -4.63145000 | -8.66611200 | -2.03951100 |

|   |             |             |             |
|---|-------------|-------------|-------------|
| H | -5.64659600 | -8.35285700 | -0.62719200 |
| C | -2.58257800 | -4.94053300 | 1.52692600  |
| H | -1.49340500 | -4.84442200 | 1.44845500  |
| H | -2.94639900 | -3.99786900 | 1.95213100  |
| H | -2.80876700 | -5.74889300 | 2.23041900  |
| C | -3.35347900 | 1.92596000  | 3.63199500  |
| H | -3.15992200 | 0.85998700  | 3.46697100  |
| H | -2.43280000 | 2.45018100  | 3.34840000  |
| H | -3.52905500 | 2.08873700  | 4.70076200  |
| C | -5.59086900 | 2.50303900  | -0.87079300 |
| H | -4.70897800 | 2.97678700  | -1.31709200 |
| H | -5.53830700 | 1.44235400  | -1.14139000 |
| H | -6.48705700 | 2.93444500  | -1.32928400 |
| C | -7.88393000 | 4.16099000  | 3.32457000  |
| H | -8.37719600 | 4.87776200  | 2.65800900  |
| H | -8.63894500 | 3.41840200  | 3.61820100  |
| H | -7.58508500 | 4.69506300  | 4.23397200  |
| H | 1.64654100  | 0.18824400  | 4.73606400  |
| N | 5.88764700  | -1.02549800 | 3.43850000  |
| O | 5.90542400  | -1.91109700 | 4.30858400  |
| O | 6.83883700  | -0.80159100 | 2.67782000  |

**cat4/b2**

|   |             |             |             |
|---|-------------|-------------|-------------|
| C | -1.56563400 | 2.28563400  | -0.76606100 |
| C | -1.71480100 | 3.72385400  | -0.86554600 |
| C | -0.46434600 | 4.25327000  | -0.79346300 |
| C | 0.44858200  | 3.14204200  | -0.61892200 |
| N | -0.24567000 | 1.96459800  | -0.61172400 |
| H | -2.65833900 | 4.23567100  | -0.99527800 |
| H | -0.16662500 | 5.29169500  | -0.84150400 |
| C | 3.44715600  | 0.21913300  | 0.32130400  |
| C | 4.55708400  | 1.13848800  | 0.47601800  |
| C | 4.08540300  | 2.37708200  | 0.16977200  |
| C | 2.68050000  | 2.22139800  | -0.14559000 |
| N | 2.32578000  | 0.90431200  | -0.05307300 |
| H | 5.55914600  | 0.85024700  | 0.76259600  |
| H | 4.61669800  | 3.31893200  | 0.16242300  |
| C | -1.55800900 | -2.00079400 | -1.11721600 |
| C | -2.95976800 | -2.15282400 | -1.43903500 |
| C | -3.52574400 | -0.91916000 | -1.32025900 |
| C | -2.46218500 | -0.00052200 | -0.97264300 |
| N | -1.28418800 | -0.68851700 | -0.83084300 |
| H | -3.43279400 | -3.08988200 | -1.69941600 |
| H | -4.55793400 | -0.63563900 | -1.47178400 |

|    |             |             |             |
|----|-------------|-------------|-------------|
| C  | 0.65827400  | -2.92259500 | -0.59309500 |
| C  | 1.55478200  | -4.03134300 | -0.35260000 |
| C  | 2.70645800  | -3.50401400 | 0.14775600  |
| C  | 2.53483300  | -2.06655900 | 0.16935300  |
| N  | 1.27100900  | -1.74428500 | -0.25588600 |
| H  | 1.31155800  | -5.06893300 | -0.53628600 |
| H  | 3.60664400  | -4.02084600 | 0.45079900  |
| C  | -2.62725800 | 1.38684800  | -0.90217500 |
| C  | 3.56045400  | -1.16651800 | 0.47350100  |
| C  | 1.82670300  | 3.28583900  | -0.44299300 |
| C  | -0.65213900 | -3.06345200 | -1.05792000 |
| Fe | 0.50761500  | 0.11174000  | -0.38731700 |
| Cl | 1.02887900  | 0.11983800  | -2.72672000 |
| O  | 0.17828800  | 0.21106000  | 1.29956900  |
| C  | 4.89185400  | -1.71726600 | 0.88902800  |
| C  | 5.23586700  | -1.77542300 | 2.25363800  |
| C  | 5.80787800  | -2.15430600 | -0.08971600 |
| C  | 6.48529900  | -2.28757100 | 2.62047100  |
| C  | 7.04710100  | -2.65991200 | 0.31769800  |
| C  | 7.40220800  | -2.74026000 | 1.66759700  |
| H  | 6.74861100  | -2.33063300 | 3.67625200  |
| H  | 7.75472200  | -2.99399700 | -0.43966100 |
| C  | -1.09042400 | -4.40399600 | -1.56488900 |
| C  | -1.65947700 | -5.36860900 | -0.71271400 |
| C  | -0.92160800 | -4.68251600 | -2.93817000 |
| C  | -2.05107800 | -6.60250400 | -1.24617300 |
| C  | -1.32606000 | -5.92693300 | -3.43149200 |
| C  | -1.88997400 | -6.90117300 | -2.60149800 |
| H  | -2.49380000 | -7.34611000 | -0.58529000 |
| H  | -1.19847600 | -6.13961400 | -4.49185100 |
| C  | -4.00906400 | 1.94302400  | -1.07936400 |
| C  | -4.76745900 | 2.33020000  | 0.04218900  |
| C  | -4.54576100 | 2.07975500  | -2.37834100 |
| C  | -6.06963300 | 2.80993900  | -0.15105400 |
| C  | -5.84530400 | 2.57200800  | -2.52761300 |
| C  | -6.62813600 | 2.93142100  | -1.42462700 |
| H  | -6.65793800 | 3.09247500  | 0.72033100  |
| H  | -6.25697200 | 2.67833700  | -3.53035500 |
| C  | 2.41833700  | 4.65696900  | -0.56013700 |
| C  | 2.50497200  | 5.49622000  | 0.56678500  |
| C  | 2.89423000  | 5.09526200  | -1.81182200 |
| C  | 3.06908300  | 6.76874200  | 0.42409800  |
| C  | 3.45206900  | 6.37415100  | -1.91332500 |
| C  | 3.54513300  | 7.22610300  | -0.80835100 |

|   |             |             |             |
|---|-------------|-------------|-------------|
| H | 3.13939800  | 7.41665800  | 1.29660800  |
| H | 3.82332000  | 6.71249600  | -2.87957000 |
| C | -1.85054900 | -5.07986000 | 0.75823300  |
| H | -0.89627000 | -4.84338700 | 1.24234000  |
| H | -2.50363700 | -4.21329300 | 0.91287900  |
| H | -2.29436100 | -5.93607000 | 1.27703800  |
| C | -0.32046800 | -3.64404300 | -3.85689900 |
| H | -0.92839500 | -2.73270200 | -3.88144200 |
| H | 0.66758200  | -3.32250700 | -3.50985800 |
| H | -0.22605100 | -4.02736400 | -4.87852000 |
| C | -2.28733200 | -8.25154600 | -3.15357700 |
| H | -2.67882000 | -8.16831900 | -4.17424700 |
| H | -1.42823600 | -8.93574200 | -3.19249300 |
| H | -3.05554700 | -8.72887500 | -2.53469400 |
| C | -3.72567000 | 1.70435600  | -3.59199500 |
| H | -2.72725900 | 2.15343600  | -3.55164300 |
| H | -3.57027700 | 0.62058400  | -3.64849700 |
| H | -4.21789000 | 2.02797900  | -4.51542500 |
| C | -4.19105900 | 2.27949500  | 1.43858400  |
| H | -3.45192000 | 1.48351900  | 1.54660100  |
| H | -3.67898800 | 3.22153700  | 1.67692000  |
| H | -4.97847900 | 2.12234700  | 2.18319400  |
| C | -8.04883200 | 3.41430500  | -1.60975500 |
| H | -8.75090200 | 2.57139000  | -1.67372200 |
| H | -8.37215600 | 4.04239600  | -0.77213900 |
| H | -8.15829000 | 3.99628600  | -2.53262600 |
| C | 2.80342600  | 4.18868200  | -3.01742100 |
| H | 3.35647200  | 3.25633300  | -2.85681800 |
| H | 1.76784000  | 3.88776300  | -3.21171300 |
| H | 3.19889200  | 4.67894700  | -3.91346500 |
| C | 1.99736300  | 5.02026300  | 1.90831500  |
| H | 0.92865100  | 4.78041300  | 1.86179300  |
| H | 2.50664500  | 4.10017200  | 2.21755800  |
| H | 2.14884800  | 5.77887800  | 2.68361800  |
| C | 4.11832100  | 8.61821200  | -0.95037300 |
| H | 4.88939100  | 8.65764200  | -1.72854700 |
| H | 3.34121200  | 9.34402700  | -1.22802000 |
| H | 4.56616500  | 8.96643500  | -0.01247500 |
| C | 5.45792300  | -2.06859400 | -1.55757000 |
| H | 4.62661700  | -2.73829400 | -1.80645200 |
| H | 5.12711100  | -1.05961300 | -1.82740400 |
| H | 6.31507700  | -2.33547400 | -2.18495600 |
| C | 4.27284700  | -1.27377800 | 3.30470900  |
| H | 4.07114100  | -0.20408100 | 3.17414600  |

|   |             |             |            |
|---|-------------|-------------|------------|
| H | 3.30411700  | -1.77835700 | 3.22952500 |
| H | 4.66849600  | -1.43074000 | 4.31388200 |
| C | 8.73304200  | -3.32382300 | 2.08526500 |
| H | 8.66835800  | -4.41305600 | 2.21621900 |
| H | 9.50804500  | -3.13449700 | 1.33348000 |
| H | 9.07579200  | -2.90308600 | 3.03757200 |
| C | -4.36629500 | -0.29286700 | 4.07778200 |
| C | -3.21643500 | -0.34307500 | 4.87501900 |
| C | -3.19320400 | -1.33888000 | 2.26312300 |
| C | -4.36020300 | -0.79868100 | 2.77038500 |
| H | -5.25997100 | -0.73789100 | 2.17061600 |
| C | -2.00038900 | -1.38308100 | 3.02880400 |
| C | -2.05054600 | -0.87873800 | 4.35100000 |
| C | 0.40544700  | -2.29991400 | 3.25831100 |
| C | -0.77168500 | -1.86039300 | 2.41224300 |
| H | 1.20410300  | -2.66516300 | 2.60660500 |
| H | -0.31013800 | -0.76988300 | 1.78488100 |
| H | -0.94546700 | -2.48788200 | 1.54166500 |
| H | 0.13430400  | -3.10764200 | 3.95530800 |
| H | -3.25502500 | 0.05288900  | 5.88271900 |
| H | 0.81457100  | -1.47161500 | 3.84905100 |
| H | -1.15524400 | -0.89851300 | 4.96391000 |
| H | -3.17777700 | -1.70926400 | 1.24356400 |
| N | -5.56975500 | 0.32062100  | 4.60125700 |
| O | -5.59610700 | 0.64130800  | 5.79711200 |
| O | -6.51859900 | 0.50473500  | 3.82442800 |

**cat4/b3**

|   |             |             |             |
|---|-------------|-------------|-------------|
| C | -0.54783700 | -2.93514500 | -0.55341000 |
| C | -1.35587000 | -4.09488500 | -0.25430600 |
| C | -2.48696700 | -3.64033500 | 0.35532700  |
| C | -2.39741700 | -2.19526100 | 0.37967000  |
| N | -1.19461800 | -1.79878500 | -0.14455800 |
| H | -1.06919800 | -5.11479200 | -0.47261200 |
| H | -3.32777400 | -4.21148300 | 0.72463400  |
| C | -2.90821900 | 2.02733700  | -0.19782200 |
| C | -4.28961900 | 2.10529200  | 0.23168200  |
| C | -4.62603200 | 0.87128300  | 0.69760600  |
| C | -3.46347800 | 0.02454600  | 0.51529300  |
| N | -2.43873900 | 0.75747800  | -0.01496800 |
| H | -4.89680600 | 2.99926800  | 0.18957100  |
| H | -5.57123400 | 0.54033200  | 1.10595200  |
| C | 2.36276100  | 0.16748200  | -0.99763100 |
| C | 3.48186500  | -0.68720400 | -1.33747200 |

|    |             |             |             |
|----|-------------|-------------|-------------|
| C  | 2.98239600  | -1.94305500 | -1.51394600 |
| C  | 1.57393800  | -1.88137900 | -1.19272900 |
| N  | 1.22751400  | -0.59090800 | -0.88461200 |
| H  | 4.50445200  | -0.35512300 | -1.44327900 |
| H  | 3.51129400  | -2.84297900 | -1.79646300 |
| C  | 1.29025200  | 2.38225100  | -0.91833700 |
| C  | 1.32503700  | 3.81496200  | -1.13063900 |
| C  | 0.03186000  | 4.23995500  | -1.14894300 |
| C  | -0.79230700 | 3.07552900  | -0.88977000 |
| N  | -0.00217200 | 1.96638600  | -0.78380300 |
| H  | 2.23055800  | 4.38980900  | -1.27143700 |
| H  | -0.34748300 | 5.24192700  | -1.29602100 |
| C  | 0.73170000  | -2.99586700 | -1.11404300 |
| C  | -2.17103300 | 3.11990500  | -0.66496600 |
| C  | -3.45477300 | -1.35547600 | 0.74807400  |
| C  | 2.42650400  | 1.56729400  | -0.92267800 |
| Fe | -0.58540700 | 0.09049800  | -0.39197900 |
| Cl | -1.21875100 | -0.09319400 | -2.70867300 |
| O  | -0.19225400 | 0.38424800  | 1.26910800  |
| H  | 0.39825600  | -0.38385500 | 1.96414100  |
| C  | 4.18646600  | 0.50658900  | 4.01299100  |
| C  | 4.98481700  | 0.14153500  | 2.92510100  |
| C  | 4.48071100  | -0.68448800 | 1.91418000  |
| C  | 3.16796900  | -1.11546600 | 1.98624000  |
| C  | 2.30883000  | -0.73382000 | 3.04494100  |
| C  | 2.86909500  | 0.07325900  | 4.06512000  |
| H  | 4.60165100  | 1.14216800  | 4.78592400  |
| H  | 5.10316700  | -0.93619900 | 1.06560400  |
| H  | 2.77288300  | -1.70287300 | 1.16870100  |
| C  | 0.88008000  | -1.09979000 | 3.01419700  |
| C  | -4.70159500 | -1.98772100 | 1.29089200  |
| C  | -4.84655900 | -2.18444400 | 2.67688400  |
| C  | -5.73018000 | -2.38245500 | 0.41065400  |
| C  | -6.01973800 | -2.77052800 | 3.16535000  |
| C  | -6.88782600 | -2.96518600 | 0.93678800  |
| C  | -7.05073900 | -3.16966800 | 2.31072400  |
| H  | -6.13004700 | -2.91660900 | 4.23884500  |
| H  | -7.68263800 | -3.26618000 | 0.25585000  |
| C  | 1.19387600  | -4.28763700 | -1.72077800 |
| C  | 0.79279900  | -4.56798500 | -3.04633700 |
| C  | 2.00582400  | -5.20262000 | -1.02359400 |
| C  | 1.22988200  | -5.75098700 | -3.65109400 |
| C  | 2.42115700  | -6.37517300 | -1.66643100 |
| C  | 2.04973200  | -6.66411600 | -2.98153200 |

|   |             |             |             |
|---|-------------|-------------|-------------|
| H | 0.92069800  | -5.96321400 | -4.67349400 |
| H | 3.04954200  | -7.07931100 | -1.12314000 |
| C | 3.77756600  | 2.19369100  | -0.76856400 |
| C | 4.69905400  | 2.27548200  | -1.82825800 |
| C | 4.15083500  | 2.62251700  | 0.52694100  |
| C | 6.01938200  | 2.65844300  | -1.55100400 |
| C | 5.47407200  | 2.99819200  | 0.75955900  |
| C | 6.43532500  | 2.97634000  | -0.25675900 |
| H | 6.74149200  | 2.68715000  | -2.36576700 |
| H | 5.77751600  | 3.26639900  | 1.76954100  |
| C | -2.88792100 | 4.41511200  | -0.89029400 |
| C | -3.50098400 | 4.64853100  | -2.13751500 |
| C | -2.94821300 | 5.38932800  | 0.12428500  |
| C | -4.16060600 | 5.86387000  | -2.34995200 |
| C | -3.61798000 | 6.59191400  | -0.12730300 |
| C | -4.23112700 | 6.84656400  | -1.35765400 |
| H | -4.62914700 | 6.04754900  | -3.31574600 |
| H | -3.66095900 | 7.34683500  | 0.65644800  |
| C | -5.57921800 | -2.17611400 | -1.07865600 |
| H | -5.44996400 | -1.11507400 | -1.32025500 |
| H | -4.68663000 | -2.68644300 | -1.45780300 |
| H | -6.45261800 | -2.55241800 | -1.62179100 |
| C | -3.74297700 | -1.76942800 | 3.62129200  |
| H | -2.83289200 | -2.35332100 | 3.43969300  |
| H | -3.47074800 | -0.71840900 | 3.47351500  |
| H | -4.03634300 | -1.91027800 | 4.66707400  |
| C | -8.29746800 | -3.83241100 | 2.85179900  |
| H | -8.48920100 | -3.54058400 | 3.89066000  |
| H | -9.18128700 | -3.57060400 | 2.25834800  |
| H | -8.20848200 | -4.92760100 | 2.83264700  |
| C | -3.44904800 | 3.59337700  | -3.21811600 |
| H | -2.42180800 | 3.27039400  | -3.41884000 |
| H | -3.98583500 | 2.68867700  | -2.90940700 |
| H | -3.89305200 | 3.95831600  | -4.15052300 |
| C | -2.29410000 | 5.13483400  | 1.46301800  |
| H | -2.66725100 | 4.20683500  | 1.91137900  |
| H | -1.20986300 | 5.01206000  | 1.35599400  |
| H | -2.48160500 | 5.95829300  | 2.16043900  |
| C | -4.97890500 | 8.13855900  | -1.59901700 |
| H | -4.92752400 | 8.44152500  | -2.65126700 |
| H | -6.04296300 | 8.03886600  | -1.34260200 |
| H | -4.57477900 | 8.95655900  | -0.99154700 |
| C | 4.28065300  | 1.95288200  | -3.24698400 |
| H | 4.22431400  | 0.87287900  | -3.42557000 |



|   |             |             |             |
|---|-------------|-------------|-------------|
| H | 3.28430100  | 2.35351200  | -3.46228800 |
| H | 4.98908200  | 2.37577500  | -3.96796000 |
| C | 7.88147800  | 3.25696900  | 0.07535100  |
| H | 8.24909400  | 2.50047900  | 0.78038300  |
| H | 8.51583300  | 3.23395400  | -0.81773100 |
| H | 8.00537400  | 4.23662900  | 0.55488600  |
| C | 3.13640000  | 2.68365400  | 1.64497400  |
| H | 2.41309600  | 3.48867800  | 1.46645300  |
| H | 2.55335800  | 1.76179800  | 1.72233100  |
| H | 3.62531200  | 2.86781100  | 2.60521700  |
| C | 2.41284600  | -4.94708500 | 0.40882500  |
| H | 2.92596100  | -3.98577400 | 0.51709900  |
| H | 1.53674700  | -4.91404100 | 1.06610300  |
| H | 3.08250600  | -5.73184000 | 0.77631500  |
| C | -0.11909800 | -3.61948700 | -3.78948100 |
| H | -1.13048300 | -3.63995500 | -3.36608400 |
| H | 0.20251300  | -2.57645600 | -3.70610600 |
| H | -0.18648800 | -3.88800200 | -4.84931700 |
| C | 2.54115300  | -7.91567300 | -3.67274000 |
| H | 1.78151700  | -8.32573100 | -4.34872000 |
| H | 3.43538100  | -7.71218100 | -4.27812200 |
| H | 2.80783300  | -8.69582000 | -2.95062900 |
| C | 0.54971000  | -2.53417900 | 2.63046400  |
| H | -0.52585400 | -2.64797700 | 2.46933000  |
| H | 1.04087400  | -2.83677400 | 1.70674900  |
| H | 0.85636600  | -3.23377200 | 3.42482200  |
| C | 0.00422100  | -0.55889400 | 4.13095500  |
| H | 0.23181500  | -1.03156700 | 5.10038600  |
| H | 0.11377800  | 0.52489400  | 4.24109500  |
| H | -1.04573800 | -0.75518900 | 3.89904900  |
| H | 2.25805600  | 0.37602700  | 4.90794100  |
| N | 6.32847800  | 0.67612800  | 2.80960400  |
| O | 7.04764200  | 0.26580400  | 1.89102500  |
| O | 6.68882600  | 1.53684600  | 3.62563600  |

**cat4/b4**

|   |             |             |             |
|---|-------------|-------------|-------------|
| C | -1.57583500 | -1.87587000 | -1.32127500 |
| C | -2.97808300 | -1.92412300 | -1.67009300 |
| C | -3.46889200 | -0.66430300 | -1.49715600 |
| C | -2.34998500 | 0.17658900  | -1.12649400 |
| N | -1.21959500 | -0.58970600 | -1.01401900 |
| H | -3.51089900 | -2.82107900 | -1.95546800 |
| H | -4.48769200 | -0.32249300 | -1.60904400 |
| C | 0.81392100  | 3.06569400  | -0.89428100 |

|    |             |             |             |
|----|-------------|-------------|-------------|
| C  | -0.00335100 | 4.23975200  | -1.12729900 |
| C  | -1.29819600 | 3.81967800  | -1.13070200 |
| C  | -1.27052400 | 2.38140000  | -0.96130700 |
| N  | 0.01945500  | 1.95571400  | -0.82625600 |
| H  | 0.38101900  | 5.24398100  | -1.24226600 |
| H  | -2.20013700 | 4.40244700  | -1.26118000 |
| C  | 2.38303000  | -2.23630200 | 0.28111300  |
| C  | 2.46401000  | -3.68115700 | 0.24937300  |
| C  | 1.32702500  | -4.12656600 | -0.35423400 |
| C  | 0.52359900  | -2.96004400 | -0.64595900 |
| N  | 1.18614800  | -1.82907100 | -0.24650200 |
| H  | 3.30458000  | -4.25842100 | 0.60946800  |
| H  | 1.03871500  | -5.14391900 | -0.58071700 |
| C  | 3.45560700  | -0.02395600 | 0.47403400  |
| C  | 4.61654000  | 0.81532500  | 0.69519100  |
| C  | 4.29173000  | 2.05965900  | 0.24916900  |
| C  | 2.91722100  | 1.99525800  | -0.20330400 |
| N  | 2.44048500  | 0.72334500  | -0.05524200 |
| H  | 5.55314900  | 0.47311000  | 1.11393000  |
| H  | 4.90150600  | 2.95276700  | 0.23632400  |
| C  | -0.75774900 | -3.00339800 | -1.20448000 |
| C  | 2.19017100  | 3.10084900  | -0.65437600 |
| C  | -2.41028900 | 1.57295500  | -1.00697800 |
| C  | 3.43889900  | -1.40781800 | 0.67694600  |
| Fe | 0.59457700  | 0.06702300  | -0.48499700 |
| Cl | 1.27206300  | -0.08099600 | -2.78343500 |
| O  | 0.15575800  | 0.26046900  | 1.17307100  |
| H  | -0.44749800 | -0.66032600 | 1.64994600  |
| C  | -0.31722200 | -1.38734800 | 3.76148800  |
| C  | -1.13147600 | -0.23327400 | 4.40936800  |
| C  | -1.01031300 | -1.61044100 | 2.41781800  |
| C  | -2.38046400 | -1.15463700 | 2.58219500  |
| C  | -3.49656600 | -1.34312600 | 1.75147400  |
| C  | -4.68152800 | -0.67763100 | 2.03268600  |
| C  | -4.75118200 | 0.16430900  | 3.15031000  |
| C  | -3.65887000 | 0.33710100  | 4.02026100  |
| C  | -2.48177000 | -0.32341500 | 3.72816300  |
| H  | -3.42026300 | -1.95549600 | 0.86243800  |
| H  | -3.75205300 | 1.01097900  | 4.86383800  |
| H  | -5.54272300 | -0.75943300 | 1.38157300  |
| H  | -0.66846000 | 0.73099400  | 4.16074600  |
| H  | 0.74030600  | -1.13617300 | 3.64342900  |
| H  | -0.79957900 | -2.51240700 | 1.84573300  |
| N  | -5.94805400 | 0.95512000  | 3.35277000  |

|   |             |             |             |
|---|-------------|-------------|-------------|
| O | -5.90864300 | 1.87059800  | 4.19007100  |
| O | -6.94777400 | 0.70812200  | 2.66516300  |
| C | -3.75826600 | 2.20490700  | -0.84385400 |
| C | -4.66079100 | 2.34778400  | -1.91325500 |
| C | -4.14190600 | 2.59174700  | 0.46223300  |
| C | -5.97128500 | 2.76754100  | -1.64313700 |
| C | -5.45830700 | 2.99606600  | 0.69013000  |
| C | -6.39706000 | 3.05906100  | -0.34545800 |
| H | -6.67672300 | 2.85498300  | -2.46835500 |
| H | -5.76749000 | 3.24229000  | 1.70418900  |
| C | 2.91405500  | 4.39800100  | -0.84267900 |
| C | 3.54641400  | 4.65401000  | -2.07590000 |
| C | 2.97204400  | 5.34686300  | 0.19571400  |
| C | 4.21993200  | 5.86749600  | -2.25138100 |
| C | 3.65646600  | 6.54848400  | -0.01906200 |
| C | 4.28226800  | 6.82846500  | -1.23736100 |
| H | 4.70914900  | 6.06591000  | -3.20393800 |
| H | 3.70346300  | 7.28097100  | 0.78544100  |
| C | 4.66521100  | -2.05544100 | 1.24585300  |
| C | 5.73904900  | -2.40149400 | 0.40069900  |
| C | 4.74085000  | -2.31902000 | 2.62674900  |
| C | 6.87452500  | -3.00052400 | 0.95673200  |
| C | 5.89369500  | -2.91852200 | 3.14551600  |
| C | 6.97056800  | -3.26815300 | 2.32585500  |
| H | 7.70447400  | -3.26501100 | 0.30313900  |
| H | 5.95131600  | -3.11585100 | 4.21495800  |
| C | -1.27223700 | -4.31106100 | -1.72286900 |
| C | -1.17414400 | -4.56606600 | -3.10747300 |
| C | -1.83619500 | -5.27483900 | -0.86458000 |
| C | -1.63507600 | -5.78957100 | -3.60458000 |
| C | -2.28827800 | -6.48523300 | -1.40324500 |
| C | -2.19707600 | -6.76063100 | -2.77019200 |
| H | -1.55151900 | -5.98865000 | -4.67202400 |
| H | -2.72247100 | -7.22952800 | -0.73740800 |
| C | 2.30842600  | 5.06271400  | 1.52373100  |
| H | 1.22491300  | 4.94376300  | 1.40604800  |
| H | 2.67761800  | 4.12454900  | 1.95405900  |
| H | 2.49138400  | 5.87001100  | 2.24094000  |
| C | 3.50885700  | 3.62014800  | -3.17750100 |
| H | 4.04675600  | 2.71169700  | -2.88187300 |
| H | 2.48497900  | 3.29703300  | -3.39420600 |
| H | 3.96008100  | 4.00527100  | -4.09824800 |
| C | 4.98565200  | 8.14764000  | -1.46435400 |
| H | 5.84507300  | 8.03392400  | -2.13543500 |

|   |             |             |             |
|---|-------------|-------------|-------------|
| H | 4.31285700  | 8.88553700  | -1.92324100 |
| H | 5.34607800  | 8.57854900  | -0.52320100 |
| C | 3.58345700  | -1.96240600 | 3.53029200  |
| H | 3.30762600  | -0.90719400 | 3.42248300  |
| H | 2.69092800  | -2.54228800 | 3.26761600  |
| H | 3.82200700  | -2.15558400 | 4.58166500  |
| C | 5.66116800  | -2.12579400 | -1.08313500 |
| H | 4.76331700  | -2.57579900 | -1.52138900 |
| H | 5.59172700  | -1.05017400 | -1.28213400 |
| H | 6.53967700  | -2.51853200 | -1.60606900 |
| C | 8.19430800  | -3.94747800 | 2.89801400  |
| H | 8.35254100  | -3.67345100 | 3.94740100  |
| H | 8.09923100  | -5.04164800 | 2.85892000  |
| H | 9.09915200  | -3.68203900 | 2.33904600  |
| C | -1.95408100 | -5.01428000 | 0.61994700  |
| H | -0.96777100 | -4.90082000 | 1.08438600  |
| H | -2.50136800 | -4.08674400 | 0.81918700  |
| H | -2.47705500 | -5.83290300 | 1.12562200  |
| C | -0.59820100 | -3.52485100 | -4.04000300 |
| H | -1.29779500 | -2.69004000 | -4.17008900 |
| H | 0.31935300  | -3.07630000 | -3.64528900 |
| H | -0.39042000 | -3.95203000 | -5.02707800 |
| C | -2.72021300 | -8.06010100 | -3.33927200 |
| H | -3.74408800 | -7.94504100 | -3.72141800 |
| H | -2.10231800 | -8.40965100 | -4.17477000 |
| H | -2.74312000 | -8.85127600 | -2.58125600 |
| C | -3.14386300 | 2.59010400  | 1.59696300  |
| H | -2.57943600 | 1.65469100  | 1.64857100  |
| H | -2.40279900 | 3.38679200  | 1.45704700  |
| H | -3.64486400 | 2.75131300  | 2.55508400  |
| C | -4.22911600 | 2.05963900  | -3.33525100 |
| H | -3.23294700 | 2.47043600  | -3.53234300 |
| H | -4.16392800 | 0.98429500  | -3.53685100 |
| H | -4.93296800 | 2.49480400  | -4.05332000 |
| C | -7.82820100 | 3.43548600  | -0.04016900 |
| H | -8.47502400 | 3.31217200  | -0.91596400 |
| H | -8.22085200 | 2.80850700  | 0.76972400  |
| H | -7.90948500 | 4.47955600  | 0.29109500  |
| H | -1.18979500 | -0.29894700 | 5.50208800  |
| H | -0.37997100 | -2.29416500 | 4.38285800  |

**cat4/b5**

|   |             |             |             |
|---|-------------|-------------|-------------|
| C | -1.67772300 | -1.83813200 | -1.22391700 |
| C | -3.08467200 | -1.89298800 | -1.55088500 |

|    |             |             |             |
|----|-------------|-------------|-------------|
| C  | -3.56925800 | -0.62746300 | -1.41685600 |
| C  | -2.45179800 | 0.21311100  | -1.05000000 |
| N  | -1.31853900 | -0.54980800 | -0.92477100 |
| H  | -3.61679300 | -2.79489000 | -1.81981600 |
| H  | -4.58006500 | -0.27336600 | -1.56179200 |
| C  | 0.64583500  | 3.14751100  | -0.59530700 |
| C  | -0.19547700 | 4.31802000  | -0.73056600 |
| C  | -1.47670100 | 3.87131800  | -0.82145500 |
| C  | -1.41906500 | 2.42582900  | -0.77618100 |
| N  | -0.12122600 | 2.01603300  | -0.63586900 |
| H  | 0.16709700  | 5.33662200  | -0.73756900 |
| H  | -2.38748800 | 4.44401900  | -0.92780300 |
| C  | 2.42104400  | -2.19399200 | -0.00174700 |
| C  | 2.51183000  | -3.63357600 | -0.09831800 |
| C  | 1.31689500  | -4.07321600 | -0.57949900 |
| C  | 0.47729900  | -2.90900700 | -0.74353800 |
| N  | 1.16888100  | -1.78049600 | -0.38021500 |
| H  | 3.39329100  | -4.20996700 | 0.14610800  |
| H  | 1.01089600  | -5.08569800 | -0.80347200 |
| C  | 3.46380300  | 0.01886900  | 0.25407000  |
| C  | 4.61263700  | 0.87059600  | 0.47976700  |
| C  | 4.21387400  | 2.14481000  | 0.22051600  |
| C  | 2.81120300  | 2.08031300  | -0.13068400 |
| N  | 2.38635500  | 0.78016900  | -0.10767400 |
| H  | 5.58907700  | 0.51702800  | 0.78080200  |
| H  | 4.79173400  | 3.05728600  | 0.27133500  |
| C  | -0.84724600 | -2.95968800 | -1.17978600 |
| C  | 2.02666500  | 3.20339900  | -0.39676900 |
| C  | -2.53469500 | 1.60289800  | -0.93865700 |
| C  | 3.50121300  | -1.37492600 | 0.33443200  |
| Fe | 0.51675700  | 0.11582900  | -0.44878200 |
| Cl | 1.03407500  | 0.14279800  | -2.77862100 |
| O  | 0.18647900  | 0.18117100  | 1.20165800  |
| H  | -0.18781800 | -0.79545600 | 1.79459900  |
| C  | 0.12283600  | -1.73083700 | 3.78894800  |
| C  | -0.65402300 | -1.14715200 | 4.75165300  |
| C  | -0.62898600 | -1.86993300 | 2.54293600  |
| C  | -1.98604200 | -1.45040800 | 2.86427600  |
| C  | -3.15286600 | -1.39352600 | 2.09282700  |
| C  | -4.30278700 | -0.82860400 | 2.63097400  |
| C  | -4.27591000 | -0.31883400 | 3.94158600  |
| C  | -3.13220300 | -0.37699900 | 4.74703400  |
| C  | -1.98346300 | -0.94807600 | 4.20827500  |
| H  | -3.15938200 | -1.75459700 | 1.07098900  |

|   |             |             |             |
|---|-------------|-------------|-------------|
| H | -3.16253200 | 0.03005900  | 5.75087000  |
| H | -5.21311800 | -0.74569800 | 2.05106900  |
| H | -0.34208800 | -0.85570100 | 5.74869200  |
| H | 1.16970700  | -1.99059300 | 3.89314400  |
| H | -0.41981400 | -2.65649000 | 1.82259700  |
| N | -5.46794000 | 0.32317600  | 4.46786400  |
| O | -5.49096500 | 0.64059900  | 5.66430700  |
| O | -6.41333600 | 0.53642800  | 3.69375500  |
| C | -3.88106100 | 2.24631800  | -1.08412900 |
| C | -4.39102200 | 2.51483700  | -2.37197300 |
| C | -4.63126600 | 2.57914500  | 0.06017400  |
| C | -5.65595000 | 3.09750100  | -2.49249600 |
| C | -5.89750200 | 3.15447300  | -0.10544100 |
| C | -6.42839700 | 3.41650600  | -1.37022500 |
| H | -6.04829600 | 3.30623100  | -3.48676800 |
| H | -6.48072000 | 3.39852400  | 0.78076600  |
| C | 2.69799200  | 4.54155700  | -0.44139000 |
| C | 3.23672900  | 5.00077900  | -1.65931800 |
| C | 2.79668300  | 5.32871400  | 0.72194600  |
| C | 3.86684600  | 6.24938000  | -1.69256200 |
| C | 3.43470000  | 6.57168300  | 0.64737900  |
| C | 3.97284400  | 7.05012900  | -0.55116000 |
| H | 4.28577400  | 6.60392000  | -2.63307400 |
| H | 3.51457400  | 7.17920500  | 1.54757600  |
| C | 4.79351200  | -2.03137700 | 0.71608300  |
| C | 5.79614800  | -2.22989500 | -0.25534600 |
| C | 5.00189100  | -2.45325400 | 2.04287900  |
| C | 6.99627900  | -2.84012100 | 0.12408800  |
| C | 6.21687200  | -3.05795800 | 2.38351900  |
| C | 7.22570900  | -3.26121100 | 1.43787500  |
| H | 7.77082400  | -2.99125900 | -0.62633300 |
| H | 6.37733900  | -3.37758500 | 3.41200300  |
| C | -1.39262100 | -4.26634000 | -1.67101600 |
| C | -1.38700800 | -4.51690100 | -3.05965900 |
| C | -1.89780300 | -5.23192200 | -0.77892800 |
| C | -1.88533400 | -5.73615800 | -3.52980500 |
| C | -2.38933600 | -6.43833700 | -1.29145600 |
| C | -2.39363600 | -6.70807000 | -2.66252500 |
| H | -1.87476900 | -5.93144700 | -4.60107600 |
| H | -2.77852000 | -7.18434600 | -0.60038000 |
| C | 2.22460300  | 4.82932300  | 2.02852700  |
| H | 1.14548300  | 4.65541600  | 1.94543400  |
| H | 2.67029900  | 3.86888700  | 2.31221200  |
| H | 2.39841100  | 5.54524100  | 2.83876100  |

|   |             |             |             |
|---|-------------|-------------|-------------|
| C | 3.13768700  | 4.14779800  | -2.90289600 |
| H | 3.65159100  | 3.18902300  | -2.76825500 |
| H | 2.09591000  | 3.89729300  | -3.13231900 |
| H | 3.57331200  | 4.65677800  | -3.76930000 |
| C | 4.62690400  | 8.41180300  | -0.61809200 |
| H | 5.41262300  | 8.44282800  | -1.38174000 |
| H | 3.89723500  | 9.19326400  | -0.87216000 |
| H | 5.07697100  | 8.68912300  | 0.34208000  |
| C | 3.91645900  | -2.27157800 | 3.07803600  |
| H | 3.53168100  | -1.24591300 | 3.08066900  |
| H | 3.06124800  | -2.92192800 | 2.85715700  |
| H | 4.27802100  | -2.51295700 | 4.08318400  |
| C | 5.57454700  | -1.78795200 | -1.68340200 |
| H | 4.63284000  | -2.18450700 | -2.07891700 |
| H | 5.49893100  | -0.69653400 | -1.75285400 |
| H | 6.39286000  | -2.11858100 | -2.33178600 |
| C | 8.51807400  | -3.94897300 | 1.81578100  |
| H | 8.74766100  | -3.81647300 | 2.87914200  |
| H | 8.46465600  | -5.03017900 | 1.62675000  |
| H | 9.36400300  | -3.56151700 | 1.23617000  |
| C | -1.90081000 | -4.98206800 | 0.71148400  |
| H | -0.87931700 | -4.92399700 | 1.10537000  |
| H | -2.38400400 | -4.03206500 | 0.96145300  |
| H | -2.42434000 | -5.78130900 | 1.24625100  |
| C | -0.86149100 | -3.47710100 | -4.02287100 |
| H | -1.52060600 | -2.60118600 | -4.05265800 |
| H | 0.11947200  | -3.09721900 | -3.71838300 |
| H | -0.78398300 | -3.88226000 | -5.03745200 |
| C | -2.96068300 | -8.00313900 | -3.19857900 |
| H | -4.01977200 | -7.89266800 | -3.46999800 |
| H | -2.42920700 | -8.33113900 | -4.09948500 |
| H | -2.89811900 | -8.80733600 | -2.45666400 |
| C | -4.08233100 | 2.36199600  | 1.45144800  |
| H | -3.41811300 | 1.49687100  | 1.49954100  |
| H | -3.49507600 | 3.23255000  | 1.77391900  |
| H | -4.89127100 | 2.20920400  | 2.17289200  |
| C | -3.57985400 | 2.17692500  | -3.60227600 |
| H | -2.57279200 | 2.60502500  | -3.54503000 |
| H | -3.44536800 | 1.09358300  | -3.70407900 |
| H | -4.06559700 | 2.54923900  | -4.51054200 |
| C | -7.81389500 | 4.00178000  | -1.52436500 |
| H | -7.89951000 | 4.59622000  | -2.44150700 |
| H | -8.57587500 | 3.21181000  | -1.57639800 |
| H | -8.07445300 | 4.64576000  | -0.67676300 |

**cat4/b6**

|    |             |             |             |
|----|-------------|-------------|-------------|
| C  | -1.29422300 | 2.35941100  | -1.06188500 |
| C  | -1.34375600 | 3.79683200  | -1.23250500 |
| C  | -0.05584300 | 4.23816500  | -1.21642900 |
| C  | 0.77769200  | 3.07788400  | -0.97332000 |
| N  | 0.00120100  | 1.95510000  | -0.91511500 |
| H  | -2.25384400 | 4.36475400  | -1.37143500 |
| H  | 0.31328500  | 5.24861400  | -1.32677400 |
| C  | 3.43998300  | 0.04338600  | 0.47798700  |
| C  | 4.59342900  | 0.89684700  | 0.68381900  |
| C  | 4.25585500  | 2.13141100  | 0.22078600  |
| C  | 2.88354400  | 2.04610200  | -0.23369500 |
| N  | 2.41815700  | 0.77173400  | -0.06434100 |
| H  | 5.53401700  | 0.57010300  | 1.10547700  |
| H  | 4.85704900  | 3.02998900  | 0.19437700  |
| C  | -1.52141500 | -1.90306100 | -1.40361100 |
| C  | -2.91800400 | -1.97861300 | -1.77129800 |
| C  | -3.43356200 | -0.72635600 | -1.61254700 |
| C  | -2.33483300 | 0.13684500  | -1.23273900 |
| N  | -1.19260700 | -0.60882800 | -1.10265100 |
| H  | -3.43113000 | -2.88636000 | -2.05860100 |
| H  | -4.45667100 | -0.40372300 | -1.74099000 |
| C  | 0.57275500  | -2.94773900 | -0.65166100 |
| C  | 1.38004100  | -4.09978000 | -0.31504500 |
| C  | 2.49313000  | -3.63104200 | 0.31472400  |
| C  | 2.39731300  | -2.18641300 | 0.31661400  |
| N  | 1.20807100  | -1.80279000 | -0.24769000 |
| H  | 1.10905800  | -5.12436500 | -0.53018700 |
| H  | 3.32751400  | -4.19280600 | 0.71193200  |
| C  | -2.42023500 | 1.53182300  | -1.11309500 |
| C  | 3.44013700  | -1.33800200 | 0.70492400  |
| C  | 2.14911700  | 3.13552900  | -0.71086000 |
| C  | -0.68801300 | -3.01591900 | -1.25382200 |
| Fe | 0.59565300  | 0.08128600  | -0.53493200 |
| Cl | 1.34581100  | -0.09671400 | -2.80819300 |
| O  | 0.08990300  | 0.29263500  | 1.10004500  |
| H  | -1.72559500 | -1.00333000 | 5.61872300  |
| C  | 4.69698100  | -1.95654600 | 1.24261100  |
| C  | 4.88507500  | -2.11168100 | 2.62837400  |
| C  | 5.70540700  | -2.36552900 | 0.34352300  |
| C  | 6.07768400  | -2.67678800 | 3.09670000  |
| C  | 6.88065200  | -2.92820100 | 0.85029700  |
| C  | 7.08482900  | -3.09492900 | 2.22415000  |



|   |             |             |             |
|---|-------------|-------------|-------------|
| H | 6.22172100  | -2.78997300 | 4.17021600  |
| H | 7.65868700  | -3.23944300 | 0.15476000  |
| C | -1.16070200 | -4.33397500 | -1.78563400 |
| C | -1.76453400 | -5.29503200 | -0.95192200 |
| C | -0.99081600 | -4.59581100 | -3.16186700 |
| C | -2.17990600 | -6.51175800 | -1.50528000 |
| C | -1.41825500 | -5.82526100 | -3.67446000 |
| C | -2.01069200 | -6.79731100 | -2.86284200 |
| H | -2.64968900 | -7.25211200 | -0.85952200 |
| H | -1.28594100 | -6.02682400 | -4.73644200 |
| C | -3.77703900 | 2.14195900  | -0.94398900 |
| C | -4.15807300 | 2.52201400  | 0.36530900  |
| C | -4.68648500 | 2.27551600  | -2.00857900 |
| C | -5.47660000 | 2.91592600  | 0.59791500  |
| C | -6.00090400 | 2.67830800  | -1.73143400 |
| C | -6.42250000 | 2.96630400  | -0.43175000 |
| H | -5.78336200 | 3.16272500  | 1.61243300  |
| H | -6.71211100 | 2.75609000  | -2.55264600 |
| C | 2.85606400  | 4.44217700  | -0.89866500 |
| C | 2.91112500  | 5.38543500  | 0.14496600  |
| C | 3.47478000  | 4.71291100  | -2.13542500 |
| C | 3.58127000  | 6.59540300  | -0.06741900 |
| C | 4.13488900  | 5.93417900  | -2.30823400 |
| C | 4.19536200  | 6.88917500  | -1.28850000 |
| H | 3.62612100  | 7.32366600  | 0.74104200  |
| H | 4.61485400  | 6.14350100  | -3.26313400 |
| C | -1.97577600 | -5.01809600 | 0.51903100  |
| H | -1.02514500 | -4.82782800 | 1.02951700  |
| H | -2.59657300 | -4.12777300 | 0.67036100  |
| H | -2.46747700 | -5.86178000 | 1.01478800  |
| C | -0.38409800 | -3.55216000 | -4.07192100 |
| H | -1.08306600 | -2.72223600 | -4.23255300 |
| H | 0.51297000  | -3.09533200 | -3.64114100 |
| H | -0.13247800 | -3.97974500 | -5.04855900 |
| C | -2.43189200 | -8.13207100 | -3.43487900 |
| H | -2.78815900 | -8.03210700 | -4.46681200 |
| H | -1.59373100 | -8.84269500 | -3.45010600 |
| H | -3.23374200 | -8.58814600 | -2.84305100 |
| C | -4.25776300 | 1.99750800  | -3.43362600 |
| H | -3.26801800 | 2.42220600  | -3.63387100 |
| H | -4.17955000 | 0.92400200  | -3.64026500 |
| H | -4.97045200 | 2.42617600  | -4.14685000 |
| C | -3.15824500 | 2.52130300  | 1.49908500  |
| H | -2.59167700 | 1.58705800  | 1.55056400  |

|   |             |             |             |
|---|-------------|-------------|-------------|
| H | -2.41864700 | 3.31953200  | 1.36098700  |
| H | -3.65911200 | 2.67956800  | 2.45781700  |
| C | -7.85671400 | 3.31980300  | -0.11480700 |
| H | -8.23259200 | 2.67842600  | 0.69173300  |
| H | -7.95065200 | 4.35933900  | 0.22716800  |
| H | -8.50717600 | 3.19535900  | -0.98776100 |
| C | 3.43301600  | 3.68765800  | -3.24474800 |
| H | 3.93877200  | 2.76214400  | -2.94621400 |
| H | 2.40458300  | 3.39551000  | -3.48355800 |
| H | 3.91100800  | 4.06740600  | -4.15412200 |
| C | 2.25882200  | 5.08628600  | 1.47518900  |
| H | 1.17901500  | 4.93581300  | 1.35963300  |
| H | 2.65575700  | 4.16050300  | 1.90779100  |
| H | 2.41986300  | 5.90052800  | 2.18977600  |
| C | 4.88343500  | 8.21703500  | -1.51176900 |
| H | 5.73025400  | 8.11941100  | -2.20106400 |
| H | 4.19554700  | 8.95527800  | -1.94711300 |
| H | 5.25888200  | 8.63852600  | -0.57218700 |
| C | 5.51716200  | -2.18754600 | -1.14533700 |
| H | 4.62878100  | -2.72283100 | -1.49869500 |
| H | 5.35831100  | -1.13367800 | -1.40048500 |
| H | 6.38739400  | -2.55267600 | -1.70100100 |
| C | 3.80897900  | -1.69181400 | 3.60279400  |
| H | 3.39803900  | -0.70891800 | 3.35069000  |
| H | 2.96904900  | -2.39656100 | 3.58178000  |
| H | 4.19231700  | -1.65833600 | 4.62841800  |
| C | 8.35243800  | -3.73359500 | 2.74518300  |
| H | 8.28672000  | -4.83028200 | 2.72051200  |
| H | 9.22262100  | -3.44996300 | 2.14147600  |
| H | 8.55178800  | -3.44302500 | 3.78287700  |
| C | -4.87763100 | 0.13588100  | 3.01653000  |
| C | -3.86697000 | 0.26896800  | 3.97713800  |
| C | -3.46432500 | -1.25956300 | 1.68693000  |
| C | -4.69003300 | -0.64831500 | 1.87286200  |
| H | -5.47957000 | -0.72100800 | 1.13581600  |
| C | -2.40595700 | -1.10806300 | 2.61124700  |
| C | -2.63781000 | -0.35226200 | 3.79565600  |
| C | -0.06788200 | -1.70234000 | 3.41894300  |
| C | -0.13606000 | -0.42770700 | 4.27190300  |
| C | -1.54859300 | -0.23635300 | 4.84736300  |
| C | -1.07853400 | -1.61518800 | 2.29186900  |
| H | 0.93040600  | -1.82165200 | 2.98815100  |
| H | 0.59562300  | -0.46494100 | 5.08900000  |
| H | -0.54557800 | -0.63051200 | 1.56160800  |

|   |             |             |            |
|---|-------------|-------------|------------|
| H | -1.05449400 | -2.42797900 | 1.56683300 |
| H | -1.63012200 | 0.73206800  | 5.35725300 |
| H | -0.26096400 | -2.58772800 | 4.04868100 |
| H | 0.12326800  | 0.42253200  | 3.63054200 |
| H | -4.05194000 | 0.88701800  | 4.84884900 |
| H | -3.28634000 | -1.82518700 | 0.78075600 |
| N | -6.10460200 | 0.89068000  | 3.16072400 |
| O | -7.04477200 | 0.64129200  | 2.39429600 |
| O | -6.15047100 | 1.77537800  | 4.02952100 |

**cat4/b7**

|    |             |             |             |
|----|-------------|-------------|-------------|
| C  | -1.13922700 | -2.05919100 | -1.46539600 |
| C  | -2.49565500 | -2.49164400 | -1.71646800 |
| C  | -3.30131400 | -1.42259400 | -1.46702000 |
| C  | -2.43690900 | -0.31045500 | -1.13173900 |
| N  | -1.13180600 | -0.73657100 | -1.10500200 |
| H  | -2.77699800 | -3.49319100 | -2.01208700 |
| H  | -4.37968800 | -1.37257100 | -1.51102600 |
| C  | -0.18245300 | 3.32410700  | -0.74686000 |
| C  | -1.28808200 | 4.23716800  | -0.94697700 |
| C  | -2.41365200 | 3.47737200  | -1.01981000 |
| C  | -1.99469500 | 2.09646800  | -0.89990500 |
| N  | -0.63978000 | 2.03360400  | -0.74363700 |
| H  | -1.19394600 | 5.31271900  | -1.00556600 |
| H  | -3.43781500 | 3.79533700  | -1.15928400 |
| C  | 2.92506600  | -1.36976800 | -0.26649400 |
| C  | 3.40433300  | -2.71871300 | -0.47625400 |
| C  | 2.37594100  | -3.42421900 | -1.02544500 |
| C  | 1.24765700  | -2.52444100 | -1.10486200 |
| N  | 1.60702600  | -1.28677500 | -0.63832000 |
| H  | 4.40497600  | -3.05870300 | -0.24818900 |
| H  | 2.35714700  | -4.46145400 | -1.32981100 |
| C  | 3.32013900  | 1.02055800  | 0.16758500  |
| C  | 4.20980000  | 2.13490900  | 0.42569200  |
| C  | 3.50035000  | 3.26787600  | 0.17415300  |
| C  | 2.16769000  | 2.84844600  | -0.20679700 |
| N  | 2.08686800  | 1.48466100  | -0.19543700 |
| H  | 5.24294400  | 2.03881000  | 0.72997600  |
| H  | 3.82496500  | 4.29728700  | 0.23957500  |
| C  | -0.02947400 | -2.90476800 | -1.52692100 |
| C  | 1.13170500  | 3.73250200  | -0.51678800 |
| C  | -2.87450700 | 1.01285000  | -0.98811700 |
| C  | 3.72911900  | -0.31547300 | 0.17860900  |
| Fe | 0.46359800  | 0.35994200  | -0.59325000 |

|    |             |             |             |
|----|-------------|-------------|-------------|
| Cl | 0.96926500  | 0.63527700  | -2.92656400 |
| O  | 0.15113600  | 0.24742500  | 1.08568700  |
| H  | -0.29335500 | -0.76625400 | 1.55817200  |
| C  | 1.02325600  | -3.07878500 | 5.27343900  |
| C  | 2.24138300  | -3.49195800 | 4.73096700  |
| C  | 2.43705600  | -3.38528200 | 3.35023200  |
| C  | 1.43745600  | -2.86016100 | 2.53790400  |
| C  | 0.20406400  | -2.42704500 | 3.06688500  |
| C  | 0.01769100  | -2.55820600 | 4.45638700  |
| H  | 0.84492800  | -3.17030200 | 6.34284800  |
| H  | 3.37643700  | -3.69656700 | 2.89950300  |
| H  | 1.60636700  | -2.77252600 | 1.47386300  |
| H  | -0.93167100 | -2.28337600 | 4.90302200  |
| C  | -0.81525500 | -1.91487600 | 2.11596300  |
| H  | -0.82887900 | -2.50079900 | 1.19665500  |
| C  | -2.16341000 | -1.52380200 | 2.54150100  |
| C  | -2.40482200 | -0.65186900 | 3.63147900  |
| C  | -3.28356900 | -1.95815800 | 1.79706400  |
| C  | -3.68860900 | -0.24897300 | 3.96364400  |
| H  | -1.56258300 | -0.25435300 | 4.18773400  |
| C  | -4.57148200 | -1.55358900 | 2.10714800  |
| C  | -4.76914200 | -0.69729100 | 3.19406100  |
| H  | -3.86881400 | 0.44508400  | 4.77530000  |
| H  | -5.42098700 | -1.86408400 | 1.51160300  |
| C  | -4.34778900 | 1.27525600  | -0.91423500 |
| C  | -5.18142100 | 1.13360200  | -2.04096500 |
| C  | -4.90951200 | 1.62886100  | 0.33614200  |
| C  | -6.56986100 | 1.23542100  | -1.87613700 |
| C  | -6.29813000 | 1.70447900  | 0.46024100  |
| C  | -7.14723700 | 1.48512400  | -0.62984500 |
| H  | -7.21289700 | 1.10892200  | -2.74601900 |
| H  | -6.72935800 | 1.92280000  | 1.43537600  |
| C  | -0.20630000 | -4.27402500 | -2.10940800 |
| C  | -0.46112300 | -5.39277300 | -1.29349600 |
| C  | -0.10960200 | -4.42301600 | -3.50894500 |
| C  | -0.60664200 | -6.65027300 | -1.89123300 |
| C  | -0.26084000 | -5.69693900 | -4.06622400 |
| C  | -0.50507500 | -6.82324100 | -3.27423100 |
| H  | -0.80578200 | -7.51431400 | -1.25917600 |
| H  | -0.18644900 | -5.81132300 | -5.14661600 |
| C  | 1.44807600  | 5.19392800  | -0.59932700 |
| C  | 1.94751000  | 5.71815600  | -1.80850900 |
| C  | 1.24535200  | 6.03572700  | 0.51061800  |
| C  | 2.23017100  | 7.08596500  | -1.88652600 |

|   |             |             |             |
|---|-------------|-------------|-------------|
| C | 1.54194300  | 7.39816000  | 0.39264000  |
| C | 2.03600000  | 7.94111500  | -0.79717600 |
| H | 2.60941100  | 7.49327000  | -2.82259500 |
| H | 1.38224900  | 8.04989800  | 1.25033500  |
| C | 5.13050300  | -0.61969200 | 0.61374000  |
| C | 5.43165300  | -0.68793200 | 1.98915800  |
| C | 6.14750600  | -0.81281900 | -0.34410700 |
| C | 6.73982400  | -0.99255600 | 2.38282300  |
| C | 7.44261100  | -1.11263400 | 0.09204100  |
| C | 7.75627500  | -1.21805800 | 1.45058700  |
| H | 6.96911800  | -1.04946500 | 3.44586200  |
| H | 8.22713500  | -1.26023200 | -0.64873500 |
| C | 4.37227600  | -0.39119500 | 3.02544500  |
| H | 4.14085400  | 0.68128700  | 3.04401200  |
| H | 3.43308800  | -0.90663400 | 2.80926700  |
| H | 4.70243500  | -0.68700800 | 4.02685400  |
| C | 5.84911600  | -0.67735300 | -1.82016900 |
| H | 5.18367300  | -1.47446400 | -2.17032100 |
| H | 5.33315400  | 0.26567500  | -2.03254900 |
| H | 6.76929900  | -0.71305900 | -2.41309100 |
| C | 9.15349600  | -1.58401700 | 1.89755700  |
| H | 9.27735900  | -2.67360800 | 1.96990900  |
| H | 9.90935000  | -1.21916900 | 1.19234600  |
| H | 9.38191100  | -1.16611000 | 2.88473800  |
| C | 0.70995400  | 5.47067100  | 1.80629700  |
| H | -0.30401000 | 5.07463700  | 1.67516300  |
| H | 1.32586000  | 4.63332200  | 2.15389900  |
| H | 0.68342600  | 6.23301300  | 2.59215900  |
| C | 2.17785500  | 4.80869700  | -2.99327900 |
| H | 2.96824900  | 4.07958800  | -2.77943800 |
| H | 1.28677000  | 4.21646100  | -3.22798400 |
| H | 2.46612400  | 5.38027700  | -3.88197000 |
| C | 2.38139700  | 9.41006600  | -0.89547100 |
| H | 3.43682600  | 9.59004100  | -0.64760500 |
| H | 2.21804200  | 9.79360000  | -1.90929400 |
| H | 1.77923700  | 10.01184100 | -0.20512800 |
| C | -4.03265400 | 1.95918200  | 1.52134100  |
| H | -3.22677400 | 1.23270700  | 1.65137800  |
| H | -3.55035500 | 2.93423900  | 1.38072400  |
| H | -4.61893400 | 2.00342900  | 2.44295900  |
| C | -4.60238300 | 0.89020900  | -3.41869100 |
| H | -3.66684500 | 1.44185800  | -3.55681700 |
| H | -4.36574400 | -0.16704400 | -3.58637300 |
| H | -5.30892800 | 1.20204000  | -4.19601600 |

|   |             |             |             |
|---|-------------|-------------|-------------|
| C | -8.64612200 | 1.54110600  | -0.44591700 |
| H | -8.95711900 | 0.90701200  | 0.39323300  |
| H | -8.98637800 | 2.56109400  | -0.22149400 |
| H | -9.17609300 | 1.20425400  | -1.34376100 |
| C | 0.13379400  | -3.21831900 | -4.38860200 |
| H | -0.71953500 | -2.53053500 | -4.35767400 |
| H | 0.99363700  | -2.63111000 | -4.04872200 |
| H | 0.29866100  | -3.51589400 | -5.42968200 |
| C | -0.59805700 | -5.24106000 | 0.20383700  |
| H | 0.27777200  | -4.75392000 | 0.64522800  |
| H | -1.46303800 | -4.61695600 | 0.45819000  |
| H | -0.72961200 | -6.21255700 | 0.69147800  |
| C | -0.62668900 | -8.19586200 | -3.89651800 |
| H | 0.35854100  | -8.66670000 | -4.02013900 |
| H | -1.23140000 | -8.86675900 | -3.27570400 |
| H | -1.08751100 | -8.14710200 | -4.89002400 |
| H | 3.02278100  | -3.89466600 | 5.37067000  |
| H | -3.12388100 | -2.60223200 | 0.94035600  |
| N | -6.09928500 | -0.18402600 | 3.45848900  |
| O | -6.21930500 | 0.73000300  | 4.28776400  |
| O | -7.05152100 | -0.65988200 | 2.82805200  |

**cat4/b8**

|   |             |             |             |
|---|-------------|-------------|-------------|
| C | 2.54669700  | 0.09807100  | -1.23443200 |
| C | 3.54680600  | -0.84056400 | -1.69431000 |
| C | 2.89968600  | -2.00727200 | -1.96952600 |
| C | 1.51049100  | -1.80568500 | -1.62584200 |
| N | 1.32248900  | -0.52031600 | -1.18713900 |
| H | 4.59805600  | -0.61326800 | -1.80226700 |
| H | 3.31104700  | -2.93474400 | -2.34315300 |
| C | -2.58802000 | -1.75304400 | -0.34033600 |
| C | -2.82149100 | -3.17654200 | -0.45571200 |
| C | -1.70115100 | -3.71841500 | -1.00956600 |
| C | -0.75590200 | -2.63957500 | -1.18164800 |
| N | -1.31010100 | -1.46256000 | -0.75064900 |
| H | -3.74142100 | -3.67267000 | -0.17897700 |
| H | -1.50595900 | -4.75069600 | -1.26553700 |
| C | -0.15996300 | 3.35281500  | -0.56342700 |
| C | 0.82685400  | 4.41152800  | -0.55999600 |
| C | 2.04459500  | 3.81224000  | -0.64807100 |
| C | 1.80287600  | 2.38751400  | -0.73825600 |
| N | 0.45947800  | 2.13869700  | -0.67184900 |
| H | 0.59547300  | 5.46522400  | -0.48690400 |
| H | 3.02342300  | 4.27053000  | -0.67459700 |

|    |             |             |             |
|----|-------------|-------------|-------------|
| C  | -2.46397100 | 2.54108300  | -0.29927200 |
| C  | -3.87440400 | 2.75734200  | -0.05810100 |
| C  | -4.43482000 | 1.53056400  | 0.11539300  |
| C  | -3.37338000 | 0.55875600  | -0.04574200 |
| N  | -2.19330000 | 1.19924400  | -0.30056500 |
| H  | -4.34928500 | 3.72785300  | -0.01839400 |
| H  | -5.46796800 | 1.28367700  | 0.31667300  |
| C  | 2.80818300  | 1.44544900  | -0.96753700 |
| C  | -3.57416500 | -0.82391500 | 0.00490000  |
| C  | 0.54188400  | -2.81166900 | -1.66946300 |
| C  | -1.53349200 | 3.57087300  | -0.44210100 |
| Fe | -0.41770900 | 0.32778000  | -0.66253700 |
| Cl | -0.87697800 | 0.61905100  | -2.99097400 |
| O  | -0.10737900 | 0.17733600  | 0.99280600  |
| H  | 0.24000100  | -0.89108000 | 1.41487500  |
| C  | 4.18504000  | -0.98826200 | 3.92065300  |
| C  | 4.30288800  | -1.20472100 | 2.53670700  |
| C  | 3.19327400  | -1.60791200 | 1.80686100  |
| C  | 1.96956600  | -1.79661000 | 2.46326000  |
| C  | 1.88174200  | -1.62257500 | 3.88120400  |
| C  | 2.98668800  | -1.20999300 | 4.61251500  |
| H  | 3.27067000  | -1.75080400 | 0.73524600  |
| H  | 2.94928700  | -1.04923700 | 5.68354100  |
| C  | 0.65069900  | -2.10876000 | 1.93523300  |
| C  | -0.20146100 | -2.31945600 | 3.11083600  |
| C  | -1.52534300 | -2.75518400 | 3.20983900  |
| C  | -2.12163400 | -2.82596900 | 4.47118300  |
| C  | -1.41542400 | -2.45616400 | 5.62668500  |
| C  | -0.08972400 | -2.02325400 | 5.53950200  |
| C  | 0.52023200  | -1.96511400 | 4.28572300  |
| H  | -2.07749000 | -3.03080800 | 2.31479400  |
| H  | -1.90279400 | -2.51173300 | 6.59712600  |
| H  | 0.46111300  | -1.74760700 | 6.43628200  |
| C  | 0.89563300  | -4.11922100 | -2.31071300 |
| C  | 0.60331900  | -4.28517300 | -3.68175800 |
| C  | 1.51443800  | -5.15598600 | -1.58730400 |
| C  | 0.94358500  | -5.48939000 | -4.30520500 |
| C  | 1.83881600  | -6.34615500 | -2.25015700 |
| C  | 1.56081200  | -6.53213500 | -3.60653100 |
| H  | 0.72398500  | -5.61460700 | -5.36443800 |
| H  | 2.32219800  | -7.14549100 | -1.69077000 |
| C  | -4.94365600 | -1.32376700 | 0.35276100  |
| C  | -5.38129800 | -1.30581600 | 1.69332500  |
| C  | -5.80684000 | -1.78375200 | -0.66538400 |

|   |             |             |             |
|---|-------------|-------------|-------------|
| C | -6.65510000 | -1.79906400 | 1.99873600  |
| C | -7.07402100 | -2.26242800 | -0.31659300 |
| C | -7.51173300 | -2.29140100 | 1.01094100  |
| H | -6.98625700 | -1.79216400 | 3.03609200  |
| H | -7.73891400 | -2.61462200 | -1.10389800 |
| C | -2.03156200 | 4.98335000  | -0.44948200 |
| C | -2.23399100 | 5.67651000  | 0.75880400  |
| C | -2.30416500 | 5.60772000  | -1.68325200 |
| C | -2.71238900 | 6.99092600  | 0.71486500  |
| C | -2.78289200 | 6.92183400  | -1.68442100 |
| C | -2.99064900 | 7.63048500  | -0.49660000 |
| H | -2.87123400 | 7.52659400  | 1.64949500  |
| H | -3.00007000 | 7.40311700  | -2.63684300 |
| C | 4.22986300  | 1.92005800  | -1.00917900 |
| C | 4.93865100  | 2.12402500  | 0.19182700  |
| C | 4.85450900  | 2.16589500  | -2.25114100 |
| C | 6.28045300  | 2.52056800  | 0.12749400  |
| C | 6.19258600  | 2.57019200  | -2.26948300 |
| C | 6.92542500  | 2.74483300  | -1.09050000 |
| H | 6.83114100  | 2.65463500  | 1.05698200  |
| H | 6.67472900  | 2.75362400  | -3.22864100 |
| C | 1.81653300  | -4.99954400 | -0.11494100 |
| H | 2.40196600  | -4.09602400 | 0.08453900  |
| H | 0.89398400  | -4.90854000 | 0.47051300  |
| H | 2.37477300  | -5.85956400 | 0.26919700  |
| C | -0.07222100 | -3.17721200 | -4.45686300 |
| H | -1.08195500 | -2.98675400 | -4.07471300 |
| H | 0.46059400  | -2.22553700 | -4.35619500 |
| H | -0.14725100 | -3.42801600 | -5.52030400 |
| C | 1.89234300  | -7.83489700 | -4.29850600 |
| H | 2.67736700  | -8.38427200 | -3.76690500 |
| H | 1.01364200  | -8.49238500 | -4.35405700 |
| H | 2.23394400  | -7.66719800 | -5.32677500 |
| C | 4.27003300  | 1.96981700  | 1.53890700  |
| H | 3.79808300  | 2.91516200  | 1.83931100  |
| H | 3.48135800  | 1.21545400  | 1.52330100  |
| H | 4.99485500  | 1.69237400  | 2.31134000  |
| C | 4.08954700  | 2.00179900  | -3.54550800 |
| H | 3.88079800  | 0.94710700  | -3.75922300 |
| H | 3.11614900  | 2.50224300  | -3.49633300 |
| H | 4.65198600  | 2.41546800  | -4.38940100 |
| C | 8.36617800  | 3.20138300  | -1.13467000 |
| H | 8.43681700  | 4.29781500  | -1.15918300 |
| H | 8.92149800  | 2.85993100  | -0.25398800 |



|   |             |             |             |
|---|-------------|-------------|-------------|
| H | 8.88016800  | 2.82457400  | -2.02666300 |
| C | -1.94318000 | 5.00352400  | 2.08048600  |
| H | -2.59079600 | 4.13157600  | 2.22977200  |
| H | -0.91263000 | 4.63195700  | 2.11544400  |
| H | -2.09253600 | 5.69172900  | 2.91907300  |
| C | -3.47422300 | 9.06287100  | -0.52612000 |
| H | -4.16981100 | 9.23500200  | -1.35583800 |
| H | -3.98446200 | 9.33459800  | 0.40491400  |
| H | -2.63771100 | 9.76364600  | -0.65550400 |
| C | -2.07588300 | 4.86289800  | -2.97828400 |
| H | -1.01342000 | 4.62997100  | -3.11573000 |
| H | -2.59393800 | 3.89766800  | -2.98453000 |
| H | -2.41491200 | 5.44972600  | -3.83860100 |
| C | -4.51637700 | -0.71951700 | 2.78515800  |
| H | -4.86265500 | -1.03090400 | 3.77634300  |
| H | -3.46821700 | -1.00943900 | 2.68345700  |
| H | -4.53900600 | 0.37711900  | 2.74768500  |
| C | -5.38537300 | -1.74507400 | -2.11767100 |
| H | -4.90189000 | -0.79446000 | -2.36665900 |
| H | -4.65440200 | -2.52989600 | -2.34508300 |
| H | -6.24765100 | -1.88267100 | -2.77897400 |
| C | -8.86793700 | -2.85613900 | 1.36749100  |
| H | -9.26035100 | -2.40960100 | 2.28825300  |
| H | -9.59832300 | -2.68204600 | 0.56872600  |
| H | -8.81771000 | -3.94198400 | 1.52893600  |
| H | 0.53135500  | -2.70563100 | 1.03744800  |
| H | -3.15116400 | -3.16531100 | 4.55719900  |
| H | 5.25546700  | -1.02308100 | 2.05534500  |
| N | 5.33802000  | -0.49583100 | 4.65223200  |
| O | 6.34059900  | -0.15244400 | 4.00796400  |
| O | 5.27061200  | -0.43013100 | 5.88665300  |

**cat4/b9**

|   |             |             |             |
|---|-------------|-------------|-------------|
| C | 1.27784200  | -2.14204300 | -1.02759400 |
| C | 1.28712700  | -3.58800100 | -1.01619300 |
| C | 0.00880700  | -3.98759700 | -0.79008600 |
| C | -0.78758800 | -2.78928300 | -0.64607000 |
| N | 0.01425000  | -1.67781800 | -0.74550400 |
| H | 2.16768600  | -4.19542300 | -1.17037400 |
| H | -0.38200200 | -4.99294300 | -0.71898300 |
| C | -3.54362400 | 0.45428000  | -0.10036800 |
| C | -4.73932100 | -0.34457500 | 0.04035200  |
| C | -4.37019100 | -1.64272600 | -0.13729500 |
| C | -2.94090100 | -1.64564600 | -0.34763300 |

|    |             |             |             |
|----|-------------|-------------|-------------|
| N  | -2.46271400 | -0.36188100 | -0.32453100 |
| H  | -5.72608800 | 0.05525900  | 0.22840700  |
| H  | -4.99044700 | -2.52768900 | -0.11850500 |
| C  | 1.71385400  | 2.11861500  | -1.38364400 |
| C  | 3.10243400  | 2.12361300  | -1.78966300 |
| C  | 3.49606300  | 0.82430300  | -1.86140000 |
| C  | 2.35397900  | 0.02077100  | -1.48308700 |
| N  | 1.28420300  | 0.82833200  | -1.21061300 |
| H  | 3.68015200  | 3.01483900  | -1.99114100 |
| H  | 4.46404700  | 0.42705800  | -2.13240700 |
| C  | -0.38900000 | 3.27934100  | -0.84824000 |
| C  | -1.15765700 | 4.48176600  | -0.60159600 |
| C  | -2.41522100 | 4.08109600  | -0.27332900 |
| C  | -2.41684900 | 2.63353700  | -0.32208500 |
| N  | -1.17866300 | 2.17668600  | -0.67928000 |
| H  | -0.76584400 | 5.48704300  | -0.67325200 |
| H  | -3.27352000 | 4.68839100  | -0.02090900 |
| C  | 2.37766500  | -1.37459900 | -1.41132400 |
| C  | -3.54149900 | 1.84935300  | -0.05692700 |
| C  | -2.17742700 | -2.80459200 | -0.51938400 |
| C  | 0.96235700  | 3.27956900  | -1.19961300 |
| Fe | -0.56972300 | 0.23951900  | -0.68985400 |
| Cl | -1.08988500 | 0.11302600  | -3.01243400 |
| O  | -0.23053400 | 0.51484700  | 0.95999600  |
| H  | 0.15019800  | -0.27652600 | 1.72855600  |
| C  | 2.11865300  | -4.76298700 | 2.77564100  |
| C  | 0.74646200  | -4.61609200 | 2.53741100  |
| C  | 0.13741000  | -3.36035500 | 2.58070400  |
| C  | 0.89968100  | -2.22596500 | 2.87522600  |
| C  | 2.29639600  | -2.38331300 | 3.07889600  |
| C  | 2.90419200  | -3.63880900 | 3.03672700  |
| H  | 2.57673800  | -5.74779800 | 2.73163000  |
| H  | -0.90780000 | -3.26687700 | 2.32800100  |
| H  | 3.97620900  | -3.73647700 | 3.19188400  |
| C  | 0.52372900  | -0.78833500 | 2.97914700  |
| C  | 1.82414500  | -0.09924900 | 3.15653200  |
| C  | 2.15790000  | 1.26536800  | 3.10951100  |
| C  | 3.48538400  | 1.66129600  | 3.22972800  |
| C  | 4.49045300  | 0.69394600  | 3.37981100  |
| C  | 4.20323200  | -0.67326900 | 3.37789100  |
| C  | 2.87642800  | -1.05772800 | 3.24486600  |
| H  | 1.39800300  | 2.01331100  | 2.92932800  |
| H  | 5.00923000  | -1.39303800 | 3.45005700  |
| C  | -0.71225400 | -0.38767300 | 3.84619000  |

|   |             |             |             |
|---|-------------|-------------|-------------|
| C | -2.02168200 | -0.95893600 | 3.26161200  |
| C | -0.50839300 | -0.94462300 | 5.27410100  |
| C | -0.88479600 | 1.14264100  | 3.94033100  |
| H | -2.14083400 | -0.66840700 | 2.21478500  |
| H | -2.06203200 | -2.04766600 | 3.33534600  |
| H | -2.87759600 | -0.57085500 | 3.82812500  |
| H | 0.41079900  | -0.54541900 | 5.71964700  |
| H | -1.35155200 | -0.66297700 | 5.91900600  |
| H | -0.43374500 | -2.03741800 | 5.26585400  |
| H | -1.80844500 | 1.37032000  | 4.48674100  |
| H | -0.06104500 | 1.61027800  | 4.48784800  |
| H | -0.95486300 | 1.58621100  | 2.94338000  |
| C | -2.89831500 | -4.09934200 | -0.76343500 |
| C | -3.03388300 | -4.52742500 | -2.10655800 |
| C | -3.45627400 | -4.86974400 | 0.27441900  |
| C | -3.71297500 | -5.71889800 | -2.37483300 |
| C | -4.13183900 | -6.05659500 | -0.04062800 |
| C | -4.27051200 | -6.49887700 | -1.35641500 |
| H | -3.81496000 | -6.04349900 | -3.40933300 |
| H | -4.56115100 | -6.64676600 | 0.76784000  |
| C | -4.83007200 | 2.54785500  | 0.25616900  |
| C | -5.21856400 | 2.73748800  | 1.59650600  |
| C | -5.65225500 | 3.00675800  | -0.79196600 |
| C | -6.42614600 | 3.38931700  | 1.86882200  |
| C | -6.85324400 | 3.65244700  | -0.47868300 |
| C | -7.25543300 | 3.85656200  | 0.84483800  |
| H | -6.72567500 | 3.53427500  | 2.90571300  |
| H | -7.49076800 | 4.00256500  | -1.28917700 |
| C | 1.64867500  | 4.59978300  | -1.37510500 |
| C | 2.40618700  | 5.14081700  | -0.31745800 |
| C | 1.53332300  | 5.29639800  | -2.59384600 |
| C | 3.03934500  | 6.37519000  | -0.49757200 |
| C | 2.18194000  | 6.52800400  | -2.73471800 |
| C | 2.94191000  | 7.08186700  | -1.69994900 |
| H | 3.62268800  | 6.79361700  | 0.32101700  |
| H | 2.09262100  | 7.06633000  | -3.67715200 |
| C | 3.60236600  | -2.08075900 | -1.91510900 |
| C | 4.73101700  | -2.25852400 | -1.09259700 |
| C | 3.61526600  | -2.54771100 | -3.24659000 |
| C | 5.85628200  | -2.90860900 | -1.61089500 |
| C | 4.76026500  | -3.19302300 | -3.72635600 |
| C | 5.89063100  | -3.38149500 | -2.92570300 |
| H | 6.72557800  | -3.04760500 | -0.97010100 |
| H | 4.76902300  | -3.55472700 | -4.75353400 |

|   |             |             |             |
|---|-------------|-------------|-------------|
| C | -3.32601800 | -4.46579200 | 1.72590500  |
| H | -2.39189700 | -4.84642600 | 2.15829600  |
| H | -3.32506400 | -3.38035600 | 1.84804900  |
| H | -4.14831900 | -4.87614700 | 2.32266600  |
| C | -2.44114100 | -3.72420200 | -3.24318100 |
| H | -2.61321200 | -2.64869200 | -3.13030500 |
| H | -1.35160900 | -3.84637300 | -3.28055800 |
| H | -2.85137600 | -4.04895100 | -4.20550700 |
| C | -5.03156500 | -7.76410000 | -1.68150800 |
| H | -5.11165000 | -8.42121200 | -0.80827100 |
| H | -6.05326500 | -7.54002300 | -2.01803700 |
| H | -4.54523200 | -8.32850800 | -2.48609000 |
| C | 4.71486500  | -1.76397000 | 0.33156700  |
| H | 4.52129300  | -0.68720400 | 0.38205700  |
| H | 3.91392300  | -2.24701700 | 0.89889100  |
| H | 5.66511600  | -1.96030600 | 0.83909400  |
| C | 2.40810000  | -2.36762500 | -4.13909000 |
| H | 1.57544900  | -2.99937000 | -3.80690900 |
| H | 2.03238500  | -1.33912900 | -4.11253000 |
| H | 2.64302400  | -2.62926900 | -5.17639000 |
| C | 7.12990900  | -4.04849600 | -3.47839700 |
| H | 7.80615700  | -3.31493600 | -3.93905600 |
| H | 7.69559800  | -4.56020000 | -2.69128400 |
| H | 6.87905400  | -4.78607400 | -4.24961100 |
| C | 2.52950000  | 4.39408900  | 0.99067400  |
| H | 1.54181900  | 4.15741800  | 1.40370100  |
| H | 3.04195600  | 3.43555500  | 0.85314800  |
| H | 3.08722900  | 4.97746300  | 1.73094000  |
| C | 3.66650000  | 8.39546300  | -1.88864900 |
| H | 3.12378200  | 9.05946000  | -2.57145100 |
| H | 3.79784800  | 8.92261400  | -0.93676000 |
| H | 4.66763000  | 8.24073600  | -2.31446300 |
| C | 0.71389100  | 4.72137500  | -3.72635200 |
| H | 1.00769800  | 3.68899000  | -3.94582900 |
| H | -0.35042900 | 4.68542200  | -3.46483500 |
| H | 0.82387400  | 5.31801100  | -4.63820300 |
| C | -4.34221800 | 2.23454500  | 2.71990300  |
| H | -4.24532300 | 1.14352800  | 2.68669200  |
| H | -3.32451200 | 2.63174400  | 2.63850900  |
| H | -4.74689500 | 2.51525100  | 3.69820800  |
| C | -5.23790900 | 2.79951700  | -2.23036900 |
| H | -4.31832600 | 3.35129100  | -2.45817400 |
| H | -5.01728000 | 1.74530300  | -2.43190800 |
| H | -6.02039700 | 3.13187100  | -2.92079700 |

|   |             |             |            |
|---|-------------|-------------|------------|
| C | -8.53928600 | 4.59014200  | 1.16075300 |
| H | -8.96944100 | 4.25571100  | 2.11181800 |
| H | -8.37054500 | 5.67287100  | 1.24397900 |
| H | -9.29133700 | 4.43958700  | 0.37766500 |
| H | 0.14633900  | -5.48790200 | 2.28741700 |
| H | 3.76305900  | 2.70679200  | 3.18991400 |
| N | 5.87647100  | 1.12256800  | 3.50332300 |
| O | 6.11574300  | 2.33579100  | 3.52346200 |
| O | 6.75274100  | 0.25233400  | 3.58466900 |

**cat4/b10**

|    |             |             |             |
|----|-------------|-------------|-------------|
| C  | 3.02180000  | -1.52529600 | -0.60219300 |
| C  | 3.45395800  | -2.90434500 | -0.57746900 |
| C  | 2.33796100  | -3.67138800 | -0.70964500 |
| C  | 1.21581500  | -2.76638200 | -0.79239800 |
| N  | 1.65578200  | -1.46956900 | -0.72603600 |
| H  | 4.48196100  | -3.22323200 | -0.47606500 |
| H  | 2.25869800  | -4.74900700 | -0.73334000 |
| C  | -2.40162000 | -0.48567200 | -1.22699800 |
| C  | -3.31005300 | -1.60782400 | -1.27856400 |
| C  | -2.55905700 | -2.73230300 | -1.13276300 |
| C  | -1.18770200 | -2.30402100 | -0.97950300 |
| N  | -1.12172800 | -0.93152300 | -0.99793900 |
| H  | -4.37909100 | -1.52247800 | -1.41249200 |
| H  | -2.88240300 | -3.76408700 | -1.12902000 |
| C  | 2.24636500  | 2.70182500  | -0.66829000 |
| C  | 3.61072700  | 3.13883000  | -0.46664100 |
| C  | 4.37887300  | 2.01770800  | -0.42428100 |
| C  | 3.48230500  | 0.89120500  | -0.57369300 |
| N  | 2.19907100  | 1.33610300  | -0.73947300 |
| H  | 3.91738100  | 4.17222500  | -0.38260500 |
| H  | 5.44941900  | 1.93721800  | -0.29641700 |
| C  | -0.13876900 | 3.15254100  | -1.04606000 |
| C  | -1.23149800 | 4.06007800  | -1.31764100 |
| C  | -2.32783300 | 3.29332500  | -1.55862400 |
| C  | -1.91918100 | 1.91584200  | -1.39314000 |
| N  | -0.58190100 | 1.85837200  | -1.10691800 |
| H  | -1.14339600 | 5.13743200  | -1.33294700 |
| H  | -3.33031800 | 3.60925700  | -1.80968200 |
| C  | 3.89669000  | -0.44051100 | -0.51798800 |
| C  | -2.79551300 | 0.83209600  | -1.46627100 |
| C  | -0.10929700 | -3.18626700 | -0.92228000 |
| C  | 1.16619500  | 3.57495900  | -0.79462800 |
| Fe | 0.52595300  | 0.19662800  | -0.83236400 |

|    |             |             |             |
|----|-------------|-------------|-------------|
| C1 | 0.77246800  | 0.08918400  | -3.19510600 |
| O  | 0.43180300  | 0.36734400  | 0.84255900  |
| H  | -0.19749200 | -0.22948100 | 1.64999800  |
| C  | -0.47588900 | 3.11179500  | 4.78993100  |
| C  | 0.75306900  | 2.45834400  | 4.59849300  |
| C  | 0.80950000  | 1.19134800  | 4.01606100  |
| C  | -0.38098700 | 0.57163100  | 3.63083600  |
| C  | -1.62348600 | 1.22608400  | 3.83540000  |
| C  | -1.67081600 | 2.49914100  | 4.40840900  |
| H  | -0.49504400 | 4.10332200  | 5.23557500  |
| H  | 1.67383300  | 2.95228900  | 4.89991600  |
| H  | 1.76077300  | 0.69310900  | 3.85157100  |
| H  | -2.62299300 | 3.00448000  | 4.55451200  |
| C  | -0.60013600 | -0.70592700 | 2.90978200  |
| C  | -2.05230400 | -0.83122700 | 2.81786800  |
| C  | -2.83978800 | -1.85137000 | 2.26611600  |
| C  | -4.22111800 | -1.71865700 | 2.24624400  |
| C  | -4.81496600 | -0.56085800 | 2.77807100  |
| C  | -4.05620800 | 0.47968000  | 3.32924300  |
| C  | -2.67583500 | 0.34438000  | 3.34269700  |
| H  | -2.36842200 | -2.72299300 | 1.82691900  |
| H  | -4.85408900 | -2.48055200 | 1.80968500  |
| H  | -4.55606400 | 1.35966900  | 3.71557400  |
| C  | -0.37011200 | -4.64383800 | -1.16679900 |
| C  | -0.46025800 | -5.09027900 | -2.50392200 |
| C  | -0.50379700 | -5.55883700 | -0.10653400 |
| C  | -0.68216900 | -6.44811700 | -2.75166300 |
| C  | -0.72302900 | -6.91094800 | -0.39873500 |
| C  | -0.81850700 | -7.37443700 | -1.71249200 |
| H  | -0.74426200 | -6.79216100 | -3.78300800 |
| H  | -0.81966600 | -7.61715500 | 0.42453400  |
| C  | -4.21421300 | 1.08548700  | -1.87877400 |
| C  | -5.15216300 | 1.60699100  | -0.96614400 |
| C  | -4.60264300 | 0.79130600  | -3.20410600 |
| C  | -6.47360600 | 1.80048100  | -1.38505500 |
| C  | -5.93012000 | 1.01135300  | -3.58445600 |
| C  | -6.88154600 | 1.51017000  | -2.68897000 |
| H  | -7.19965600 | 2.18106500  | -0.66867300 |
| H  | -6.22952800 | 0.78258000  | -4.60626700 |
| C  | 1.41587900  | 5.04409400  | -0.64434900 |
| C  | 1.23377600  | 5.64895600  | 0.61579500  |
| C  | 1.82818600  | 5.81167500  | -1.75012100 |
| C  | 1.47223100  | 7.02142700  | 0.74600400  |
| C  | 2.05464300  | 7.18170600  | -1.57796600 |

|   |             |             |             |
|---|-------------|-------------|-------------|
| C | 1.87955900  | 7.80462000  | -0.33862500 |
| H | 1.33613500  | 7.48945300  | 1.71977800  |
| H | 2.37488200  | 7.77522200  | -2.43296400 |
| C | 5.36189700  | -0.72100500 | -0.36932100 |
| C | 5.96934700  | -0.67300300 | 0.90183600  |
| C | 6.12966400  | -1.03451500 | -1.50919400 |
| C | 7.33642500  | -0.95037000 | 1.01191900  |
| C | 7.49361900  | -1.30545000 | -1.35592600 |
| C | 8.11550800  | -1.26753900 | -0.10453000 |
| H | 7.80302700  | -0.91917000 | 1.99531900  |
| H | 8.08444800  | -1.55080200 | -2.23712300 |
| C | -0.43051800 | -5.09675300 | 1.32764300  |
| H | 0.36879800  | -4.37003200 | 1.48550600  |
| H | -1.36308900 | -4.60652600 | 1.63186700  |
| H | -0.26673100 | -5.93642100 | 2.01049100  |
| C | -0.32560000 | -4.11405600 | -3.65027800 |
| H | -1.16772100 | -3.41220900 | -3.67002700 |
| H | 0.57389200  | -3.49649900 | -3.55547700 |
| H | -0.29246400 | -4.63718700 | -4.61181600 |
| C | -1.08746600 | -8.83289500 | -2.00681500 |
| H | -0.75583600 | -9.47695600 | -1.18447700 |
| H | -2.16045400 | -9.01895700 | -2.15373500 |
| H | -0.57587100 | -9.15926800 | -2.91991000 |
| C | 5.16287300  | -0.31473300 | 2.12950400  |
| H | 4.80152900  | 0.71909500  | 2.07556400  |
| H | 4.27406900  | -0.94533400 | 2.22666100  |
| H | 5.76015600  | -0.42193700 | 3.04102800  |
| C | 5.48473700  | -1.08707500 | -2.87523000 |
| H | 4.78807400  | -1.93023800 | -2.95103800 |
| H | 4.89285000  | -0.18651800 | -3.07165700 |
| H | 6.23715300  | -1.19146300 | -3.66416100 |
| C | 9.59827100  | -1.52900800 | 0.03354300  |
| H | 10.17851200 | -0.60199900 | -0.07414900 |
| H | 9.84206900  | -1.95111600 | 1.01525900  |
| H | 9.95671700  | -2.22577800 | -0.73285600 |
| C | 0.78854900  | 4.82548100  | 1.80225300  |
| H | -0.21093700 | 4.40369000  | 1.64590100  |
| H | 1.44918300  | 3.96845200  | 1.97153300  |
| H | 0.76310700  | 5.42495000  | 2.71786600  |
| C | 2.09463100  | 9.29296400  | -0.18095200 |
| H | 1.15856900  | 9.84940500  | -0.32850900 |
| H | 2.46316200  | 9.54162700  | 0.82106300  |
| H | 2.81712600  | 9.67441500  | -0.91153600 |
| C | 2.02444000  | 5.15882500  | -3.09901000 |

|   |             |             |             |
|---|-------------|-------------|-------------|
| H | 2.81954400  | 4.40496700  | -3.06126900 |
| H | 1.11818700  | 4.63199000  | -3.41886300 |
| H | 2.28569000  | 5.89764100  | -3.86410900 |
| C | -4.74815700 | 1.97838300  | 0.44008200  |
| H | -3.94744100 | 1.33547300  | 0.80962100  |
| H | -4.36470000 | 3.00671700  | 0.47741200  |
| H | -5.59344200 | 1.90851500  | 1.13153200  |
| C | -3.60977500 | 0.23006100  | -4.19800500 |
| H | -2.64119400 | 0.73742100  | -4.13912600 |
| H | -3.40864500 | -0.82984100 | -3.99848500 |
| H | -3.98992400 | 0.31479200  | -5.22186000 |
| C | -8.30698100 | 1.75720300  | -3.12825800 |
| H | -9.00985300 | 1.62445700  | -2.29802300 |
| H | -8.43736200 | 2.78178700  | -3.50394800 |
| H | -8.60261700 | 1.07631500  | -3.93475300 |
| C | 0.28569000  | -1.88112400 | 3.17863200  |
| C | 1.56622300  | -1.97235600 | 2.60897100  |
| C | -0.12475400 | -2.89784100 | 4.05857900  |
| C | 2.40961700  | -3.04236700 | 2.91599400  |
| H | 1.87840500  | -1.21164400 | 1.90254300  |
| C | 0.72029300  | -3.96276900 | 4.37086100  |
| H | -1.11433500 | -2.84047800 | 4.50397900  |
| C | 1.99412900  | -4.03889600 | 3.80159400  |
| H | 3.38180000  | -3.10895200 | 2.43596000  |
| H | 0.38161200  | -4.73559400 | 5.05745500  |
| H | 2.64994500  | -4.87450500 | 4.03402000  |
| N | -6.25776900 | -0.42265200 | 2.71911400  |
| O | -6.92840600 | -1.38680700 | 2.32949000  |
| O | -6.75994900 | 0.66041000  | 3.05875100  |

**cat4/b11**

|   |             |             |             |
|---|-------------|-------------|-------------|
| C | 2.47423900  | 0.24402200  | -1.26822500 |
| C | 3.53190300  | -0.65214300 | -1.68576800 |
| C | 2.93785500  | -1.81960600 | -2.06520100 |
| C | 1.52499100  | -1.67589800 | -1.79437400 |
| N | 1.27267300  | -0.41271100 | -1.32948800 |
| H | 4.58399000  | -0.40629200 | -1.68901400 |
| H | 3.40257600  | -2.71924600 | -2.44556100 |
| C | -2.48306100 | -1.86604300 | -0.30532300 |
| C | -2.66968200 | -3.29112300 | -0.47417500 |
| C | -1.58148500 | -3.75647000 | -1.15126900 |
| C | -0.68856300 | -2.63318100 | -1.33091200 |
| N | -1.26131300 | -1.50330300 | -0.80993800 |
| H | -3.53740800 | -3.84175500 | -0.13836500 |



|    |             |             |             |
|----|-------------|-------------|-------------|
| H  | -1.37394800 | -4.76565000 | -1.47991900 |
| C  | -0.43968700 | 3.36123900  | -0.89427600 |
| C  | 0.48649900  | 4.47441400  | -0.93050100 |
| C  | 1.73970500  | 3.94228500  | -0.89085100 |
| C  | 1.58218900  | 2.50296600  | -0.89183700 |
| N  | 0.25560200  | 2.18419500  | -0.89530000 |
| H  | 0.19543300  | 5.51569400  | -0.95361100 |
| H  | 2.69325600  | 4.45308600  | -0.88838000 |
| C  | -2.66530400 | 2.41566200  | -0.45694100 |
| C  | -4.05431300 | 2.54853700  | -0.07007400 |
| C  | -4.48619300 | 1.30441800  | 0.27662900  |
| C  | -3.37753200 | 0.39963000  | 0.05135300  |
| N  | -2.29234000 | 1.10240600  | -0.38593300 |
| H  | -4.60031800 | 3.48184400  | -0.05130600 |
| H  | -5.46446400 | 1.00177300  | 0.62450100  |
| C  | 2.64986900  | 1.60131900  | -0.96042900 |
| C  | -3.46583700 | -0.99152700 | 0.17297100  |
| C  | 0.60046900  | -2.72294900 | -1.86760100 |
| C  | -1.82386200 | 3.49245700  | -0.75170100 |
| Fe | -0.49429300 | 0.33621500  | -0.79232700 |
| Cl | -1.06105100 | 0.52094800  | -3.12175500 |
| O  | -0.12942400 | 0.27715100  | 0.87546000  |
| H  | 0.31985900  | -0.77557300 | 1.29050300  |
| C  | 4.59435600  | -0.38039000 | 3.17663100  |
| C  | 3.45818400  | -0.27131500 | 3.99055800  |
| C  | 3.33271100  | -1.55097300 | 1.51202200  |
| C  | 4.54203700  | -1.02762000 | 1.93842300  |
| H  | 3.53582700  | 0.25239600  | 4.93657800  |
| H  | 5.43148300  | -1.07921500 | 1.32343600  |
| C  | 0.86516300  | -1.89732500 | 1.81686000  |
| C  | 2.16659600  | -1.42751900 | 2.29080200  |
| C  | 2.24604400  | -0.78150000 | 3.55103100  |
| C  | 0.95719200  | -0.58431600 | 4.32260900  |
| H  | 0.89959800  | -2.52845700 | 0.93127100  |
| H  | 1.15926200  | -0.40397200 | 5.38510600  |
| H  | 0.47862100  | 0.32866200  | 3.93110400  |
| H  | 3.27025000  | -2.02867000 | 0.54203200  |
| C  | -0.07094500 | -2.34519500 | 2.86463000  |
| C  | -1.00833800 | -3.36639500 | 2.64129600  |
| C  | -1.85838600 | -3.78853100 | 3.66227800  |
| C  | -1.77981700 | -3.19889600 | 4.92653000  |
| C  | -0.85616200 | -2.17391600 | 5.15458500  |
| C  | -0.01072900 | -1.73463400 | 4.13614700  |
| H  | -1.07403500 | -3.81617600 | 1.65536000  |

|   |             |             |             |
|---|-------------|-------------|-------------|
| H | -2.58643600 | -4.57215600 | 3.46806000  |
| H | -2.43774400 | -3.52663500 | 5.72767400  |
| H | -0.79695200 | -1.70452200 | 6.13499600  |
| C | 1.00717700  | -3.99106800 | -2.55344000 |
| C | 0.87515500  | -4.05731200 | -3.95688800 |
| C | 1.51085600  | -5.09407200 | -1.83723200 |
| C | 1.23546200  | -5.23747700 | -4.61556800 |
| C | 1.86115500  | -6.25584900 | -2.53505300 |
| C | 1.72439800  | -6.34908900 | -3.92274500 |
| H | 1.13264700  | -5.28788200 | -5.69849200 |
| H | 2.25305200  | -7.10664400 | -1.97974700 |
| C | 4.02674900  | 2.08082500  | -0.62177300 |
| C | 4.32168900  | 2.29895400  | 0.74553300  |
| C | 5.03016200  | 2.25179100  | -1.59328600 |
| C | 5.64079000  | 2.55965400  | 1.12003000  |
| C | 6.34143700  | 2.51919000  | -1.17422800 |
| C | 6.67164800  | 2.63877100  | 0.17732400  |
| H | 5.87605800  | 2.67986600  | 2.17570600  |
| H | 7.12245500  | 2.62676300  | -1.92565100 |
| C | -4.69674400 | -1.56648800 | 0.80238300  |
| C | -4.80321600 | -1.56098400 | 2.20931500  |
| C | -5.74327100 | -2.08536500 | 0.01401700  |
| C | -5.93348000 | -2.13147200 | 2.80401700  |
| C | -6.85954400 | -2.64145000 | 0.64961100  |
| C | -6.96589900 | -2.68757700 | 2.04267300  |
| H | -6.01007500 | -2.13525400 | 3.89024600  |
| H | -7.66834800 | -3.04166300 | 0.03994600  |
| C | -2.42515000 | 4.85994000  | -0.85141400 |
| C | -2.85061900 | 5.32783200  | -2.11068000 |
| C | -2.56122000 | 5.67017500  | 0.29176900  |
| C | -3.41299500 | 6.60538400  | -2.20213100 |
| C | -3.12813600 | 6.94259200  | 0.15827900  |
| C | -3.56300900 | 7.42569600  | -1.07943000 |
| H | -3.74009900 | 6.96891500  | -3.17515800 |
| H | -3.23112800 | 7.57048900  | 1.04203200  |
| C | 0.37761600  | -2.86030400 | -4.73417900 |
| H | -0.53678100 | -2.43869000 | -4.30375000 |
| H | 1.11003200  | -2.04458400 | -4.70768500 |
| H | 0.19058500  | -3.11988100 | -5.78172800 |
| C | 1.68586600  | -5.02786800 | -0.33756100 |
| H | 2.33399500  | -4.19231700 | -0.05093800 |
| H | 0.72877000  | -4.87000000 | 0.17195300  |
| H | 2.12930500  | -5.95013300 | 0.05195400  |
| C | 2.07087900  | -7.62654700 | -4.65351700 |

|   |             |             |             |
|---|-------------|-------------|-------------|
| H | 1.18880900  | -8.27172900 | -4.76914400 |
| H | 2.45505200  | -7.42201400 | -5.65960400 |
| H | 2.82832200  | -8.20611600 | -4.11347600 |
| C | 3.23105400  | 2.27770900  | 1.79194000  |
| H | 2.57993700  | 3.15403200  | 1.68509400  |
| H | 2.58287500  | 1.40174200  | 1.69670400  |
| H | 3.65811800  | 2.29089400  | 2.79805500  |
| C | 4.70481100  | 2.16798400  | -3.06964100 |
| H | 4.59577800  | 1.13328000  | -3.41409300 |
| H | 3.75452200  | 2.66676300  | -3.28899100 |
| H | 5.49112400  | 2.63994800  | -3.66909700 |
| C | 8.09479500  | 2.85159300  | 0.63756000  |
| H | 8.23256600  | 3.84998400  | 1.07424300  |
| H | 8.35494100  | 2.12097800  | 1.41303600  |
| H | 8.80741600  | 2.74752200  | -0.18822400 |
| C | -2.09616200 | 5.16826600  | 1.63945700  |
| H | -2.62629500 | 4.25104600  | 1.92137400  |
| H | -1.02961500 | 4.91572500  | 1.61844200  |
| H | -2.25984300 | 5.91741200  | 2.42143000  |
| C | -2.69037700 | 4.45805300  | -3.33601800 |
| H | -1.63749300 | 4.21112700  | -3.51326300 |
| H | -3.19900800 | 3.49537200  | -3.21320500 |
| H | -3.08751100 | 4.95309700  | -4.22869400 |
| C | -4.20623600 | 8.78903700  | -1.19822300 |
| H | -5.30024400 | 8.72304600  | -1.11729000 |
| H | -3.86271800 | 9.46607600  | -0.40772500 |
| H | -3.98198500 | 9.25587400  | -2.16439700 |
| C | -5.67692200 | -2.02060700 | -1.49557000 |
| H | -5.39467500 | -1.01731500 | -1.83339700 |
| H | -4.91945900 | -2.70345900 | -1.89695700 |
| H | -6.64214200 | -2.28064800 | -1.94341100 |
| C | -3.73959100 | -0.90544200 | 3.05968400  |
| H | -2.73227300 | -1.19594500 | 2.75089400  |
| H | -3.79360700 | 0.18643800  | 2.96428300  |
| H | -3.85847100 | -1.16686600 | 4.11496900  |
| C | -8.15832200 | -3.33485000 | 2.70986500  |
| H | -9.04816500 | -3.29393300 | 2.07115000  |
| H | -7.96573100 | -4.39396900 | 2.93117000  |
| H | -8.40148000 | -2.84600700 | 3.66049900  |
| N | 5.82491300  | 0.26983500  | 3.57930900  |
| O | 6.85300500  | 0.04546600  | 2.92705900  |
| O | 5.78757000  | 1.04715900  | 4.54517700  |

cat4/b12

|    |             |             |             |
|----|-------------|-------------|-------------|
| C  | 2.43892900  | 0.34887300  | -1.32599700 |
| C  | 3.51857100  | -0.49699500 | -1.78903300 |
| C  | 2.96127500  | -1.68372800 | -2.16584300 |
| C  | 1.55198900  | -1.60025100 | -1.85355500 |
| N  | 1.26288500  | -0.35279600 | -1.36664200 |
| H  | 4.55926000  | -0.20901300 | -1.81858400 |
| H  | 3.45087500  | -2.55857700 | -2.57174400 |
| C  | -2.43728300 | -1.94317800 | -0.32697300 |
| C  | -2.56468300 | -3.37693400 | -0.48274300 |
| C  | -1.45961500 | -3.80268300 | -1.15932500 |
| C  | -0.61702600 | -2.64400300 | -1.35558300 |
| N  | -1.23312400 | -1.53545600 | -0.83904700 |
| H  | -3.40633500 | -3.96200100 | -0.13876500 |
| H  | -1.21058000 | -4.80544800 | -1.47869900 |
| C  | -0.57091100 | 3.35669200  | -0.86144200 |
| C  | 0.31821000  | 4.50055400  | -0.87282800 |
| C  | 1.58780800  | 4.00918300  | -0.84461500 |
| C  | 1.47679000  | 2.56550500  | -0.87905900 |
| N  | 0.16156000  | 2.20321700  | -0.88692500 |
| H  | -0.00690100 | 5.53194900  | -0.87357800 |
| H  | 2.52388400  | 4.55097400  | -0.83191000 |
| C  | -2.76539000 | 2.33290800  | -0.44865000 |
| C  | -4.16193600 | 2.41411700  | -0.07381600 |
| C  | -4.55262800 | 1.15299300  | 0.25834000  |
| C  | -3.41030100 | 0.28974500  | 0.03575000  |
| N  | -2.34692800 | 1.03288800  | -0.38656200 |
| H  | -4.74008500 | 3.32774700  | -0.05241600 |
| H  | -5.52260300 | 0.81302900  | 0.59480900  |
| C  | 2.57282800  | 1.70271100  | -0.98139000 |
| C  | -3.44999900 | -1.10379500 | 0.15417500  |
| C  | 0.66838900  | -2.68343800 | -1.90785100 |
| C  | -1.95903400 | 3.44101400  | -0.72317000 |
| Fe | -0.52498700 | 0.32894300  | -0.80506000 |
| Cl | -1.10827400 | 0.52148200  | -3.13275600 |
| O  | -0.14957600 | 0.25683000  | 0.86157200  |
| H  | 0.36185700  | -0.77981200 | 1.28416400  |
| C  | 4.64832400  | -0.30142500 | 3.11631500  |
| C  | 3.56453300  | -0.36081700 | 4.00113600  |
| C  | 3.37663800  | -1.39485000 | 1.40804100  |
| C  | 4.57373900  | -0.83409400 | 1.82673400  |
| H  | 3.63921400  | 0.04893600  | 4.99975700  |
| H  | 5.42634100  | -0.75701600 | 1.16488200  |
| C  | 0.93264500  | -1.88302200 | 1.79244800  |
| C  | 2.24641700  | -1.43305300 | 2.24209700  |

|   |             |             |             |
|---|-------------|-------------|-------------|
| C | 2.38358800  | -0.93515600 | 3.55870500  |
| H | 0.93290900  | -2.50839700 | 0.90185500  |
| H | 3.28830100  | -1.77391700 | 0.39822300  |
| C | 0.05605800  | -2.33644300 | 2.88423100  |
| C | -1.01559600 | -3.22292500 | 2.70288400  |
| C | -1.83733900 | -3.58756300 | 3.76855600  |
| C | -1.60120700 | -3.06615700 | 5.04396700  |
| C | -0.53161600 | -2.19236600 | 5.25386400  |
| C | 0.28271200  | -1.84175200 | 4.18097600  |
| H | -1.20781000 | -3.60572600 | 1.70557500  |
| H | -2.67677200 | -4.25566800 | 3.59682500  |
| H | -2.24389900 | -3.33842700 | 5.87712300  |
| H | -0.31133300 | -1.78142500 | 6.23428400  |
| C | 1.11792500  | -3.93878900 | -2.59050000 |
| C | 0.95261400  | -4.02972900 | -3.98894400 |
| C | 1.69450800  | -5.00563800 | -1.87500700 |
| C | 1.35976200  | -5.19641300 | -4.64407700 |
| C | 2.08894300  | -6.15567800 | -2.56887300 |
| C | 1.92511500  | -6.27177000 | -3.95185300 |
| H | 1.23258100  | -5.26555800 | -5.72336800 |
| H | 2.53747000  | -6.97852100 | -2.01433800 |
| C | 3.93267800  | 2.22174900  | -0.63276900 |
| C | 4.21730600  | 2.41850200  | 0.74141800  |
| C | 4.92814500  | 2.45954100  | -1.59757000 |
| C | 5.52131200  | 2.73620200  | 1.12234200  |
| C | 6.22515600  | 2.78111900  | -1.17014600 |
| C | 6.54779700  | 2.88976700  | 0.18325700  |
| H | 5.75051900  | 2.84585800  | 2.18039600  |
| H | 7.00038700  | 2.94274700  | -1.91802900 |
| C | -4.65103400 | -1.72065900 | 0.80050200  |
| C | -4.76286400 | -1.67220500 | 2.20676700  |
| C | -5.66653300 | -2.32345600 | 0.02988200  |
| C | -5.85503100 | -2.29644800 | 2.81991500  |
| C | -6.74638500 | -2.92737400 | 0.68357200  |
| C | -6.84899100 | -2.94064500 | 2.07790600  |
| H | -5.93377100 | -2.26907100 | 3.90571000  |
| H | -7.53072600 | -3.39162600 | 0.08743300  |
| C | -2.60328900 | 4.78981300  | -0.80556100 |
| C | -3.01847400 | 5.27180200  | -2.06280300 |
| C | -2.78751700 | 5.56976900  | 0.35203300  |
| C | -3.62044800 | 6.53244900  | -2.13794900 |
| C | -3.39269300 | 6.82590200  | 0.23445300  |
| C | -3.81923800 | 7.32206500  | -1.00110400 |
| H | -3.94022300 | 6.90678700  | -3.10929700 |

|   |             |             |             |
|---|-------------|-------------|-------------|
| H | -3.53268300 | 7.43065600  | 1.12919000  |
| C | 0.36257700  | -2.87324000 | -4.76240500 |
| H | -0.58575300 | -2.53474100 | -4.33181300 |
| H | 1.02170900  | -1.99804000 | -4.72743300 |
| H | 0.19983300  | -3.14156500 | -5.81175000 |
| C | 1.89613800  | -4.91382600 | -0.37994700 |
| H | 2.51181800  | -4.04689200 | -0.11522600 |
| H | 0.94188000  | -4.79431700 | 0.14575400  |
| H | 2.38831900  | -5.81062200 | 0.01057900  |
| C | 2.32250900  | -7.53695200 | -4.67809200 |
| H | 1.47081500  | -8.22431900 | -4.77692900 |
| H | 2.68273900  | -7.32220700 | -5.69091800 |
| H | 3.11416000  | -8.07537200 | -4.14460900 |
| C | 3.13255500  | 2.30999700  | 1.78945000  |
| H | 2.44341800  | 3.16056400  | 1.72058000  |
| H | 2.52066200  | 1.41237600  | 1.66193400  |
| H | 3.56248600  | 2.30136200  | 2.79454200  |
| C | 4.61890300  | 2.38542200  | -3.07835900 |
| H | 4.72997800  | 1.36941200  | -3.47587700 |
| H | 3.58699300  | 2.68871200  | -3.28122200 |
| H | 5.29167400  | 3.03750700  | -3.64689700 |
| C | 7.95709900  | 3.16749500  | 0.65107000  |
| H | 8.03915900  | 4.15958900  | 1.11521100  |
| H | 8.25693800  | 2.43141100  | 1.40674600  |
| H | 8.67432700  | 3.12579600  | -0.17620200 |
| C | -2.33080000 | 5.05435500  | 1.69747900  |
| H | -2.83966000 | 4.11778600  | 1.95372800  |
| H | -1.25762000 | 4.83101900  | 1.68973900  |
| H | -2.52742100 | 5.78345600  | 2.49069800  |
| C | -2.80339800 | 4.43674700  | -3.30380500 |
| H | -1.73730800 | 4.24965900  | -3.47608300 |
| H | -3.26122800 | 3.44623600  | -3.20579800 |
| H | -3.21780300 | 4.92923400  | -4.19003200 |
| C | -4.50500700 | 8.66595100  | -1.10205100 |
| H | -5.59617000 | 8.56491000  | -1.01860400 |
| H | -4.18055100 | 9.34386500  | -0.30419800 |
| H | -4.29844500 | 9.15122400  | -2.06302900 |
| C | -5.61262300 | -2.29168500 | -1.48162400 |
| H | -5.35287800 | -1.29097500 | -1.84382300 |
| H | -4.84666700 | -2.96872200 | -1.87630100 |
| H | -6.57664900 | -2.58012100 | -1.91449700 |
| C | -3.76107000 | -0.90558100 | 3.04080500  |
| H | -2.73748600 | -1.03691100 | 2.68270700  |
| H | -3.97387800 | 0.17028800  | 2.99238300  |

|   |             |             |            |
|---|-------------|-------------|------------|
| H | -3.79695000 | -1.21642400 | 4.08899500 |
| C | -7.99914900 | -3.64217500 | 2.76416000 |
| H | -8.90426000 | -3.62954100 | 2.14582300 |
| H | -7.76057100 | -4.69554200 | 2.96751300 |
| H | -8.23968000 | -3.17381900 | 3.72552400 |
| N | 5.85709700  | 0.38839700  | 3.52520600 |
| O | 6.86378400  | 0.28406400  | 2.81266900 |
| O | 5.81780800  | 1.07120200  | 4.55838700 |
| O | 1.33621400  | -0.98466300 | 4.45087000 |

**cat4/b13**

|    |             |             |             |
|----|-------------|-------------|-------------|
| C  | -0.79135000 | -2.97373600 | -0.80743700 |
| C  | -1.56109900 | -4.10285500 | -0.33436300 |
| C  | -2.59149200 | -3.59732600 | 0.40071500  |
| C  | -2.48681500 | -2.15479900 | 0.33385500  |
| N  | -1.36902600 | -1.80797100 | -0.38031000 |
| H  | -1.31826000 | -5.13799700 | -0.53276600 |
| H  | -3.37608600 | -4.13346700 | 0.91714200  |
| C  | -2.97208000 | 2.06353700  | -0.29989500 |
| C  | -4.29095300 | 2.18397400  | 0.28619500  |
| C  | -4.59223700 | 0.97171300  | 0.82744500  |
| C  | -3.47587200 | 0.09460800  | 0.53513600  |
| N  | -2.50852900 | 0.78786800  | -0.13621900 |
| H  | -4.88217300 | 3.08951500  | 0.28760200  |
| H  | -5.48817300 | 0.67312800  | 1.35430100  |
| C  | 2.10693200  | 0.03743400  | -1.68106700 |
| C  | 3.16400800  | -0.85521900 | -2.10879800 |
| C  | 2.61549200  | -2.09939900 | -2.21129900 |
| C  | 1.24552000  | -1.98955000 | -1.76131600 |
| N  | 0.96224500  | -0.68321100 | -1.46334900 |
| H  | 4.18146100  | -0.55343500 | -2.31266500 |
| H  | 3.09064600  | -3.02150000 | -2.51720200 |
| C  | 1.12322500  | 2.28353600  | -1.48026700 |
| C  | 1.18367300  | 3.71634400  | -1.68055700 |
| C  | -0.09205700 | 4.18098500  | -1.57436400 |
| C  | -0.92373500 | 3.04109800  | -1.24452800 |
| N  | -0.16295000 | 1.90612700  | -1.22556100 |
| H  | 2.08970700  | 4.26562100  | -1.89848800 |
| H  | -0.45167500 | 5.19605000  | -1.67321200 |
| C  | 0.40412300  | -3.08188900 | -1.52552600 |
| C  | -2.26748300 | 3.12824100  | -0.87003100 |
| C  | -3.46366700 | -1.27679500 | 0.81582700  |
| C  | 2.22560600  | 1.43171800  | -1.60059400 |
| Fe | -0.75127700 | 0.05432600  | -0.75879000 |

|    |             |             |             |
|----|-------------|-------------|-------------|
| C1 | -1.69508300 | -0.13768900 | -2.95402700 |
| O  | -0.09976800 | 0.27651200  | 0.82141800  |
| C  | 2.84910900  | 0.95561800  | 5.92073600  |
| C  | 3.97191300  | 0.91065900  | 5.12057800  |
| C  | 3.93281200  | 0.26172200  | 3.85777400  |
| C  | 2.69187500  | -0.34221800 | 3.44266200  |
| C  | 1.54283100  | -0.27170700 | 4.28917300  |
| C  | 1.64007000  | 0.36487700  | 5.51262100  |
| C  | 5.02914900  | 0.20887000  | 2.92517900  |
| C  | 2.58776000  | -1.00723600 | 2.16630800  |
| C  | 3.70041600  | -1.02252100 | 1.32002200  |
| C  | 4.89124800  | -0.40566100 | 1.68485700  |
| C  | 1.33326100  | -1.60301000 | 1.75296000  |
| C  | 0.38959100  | -2.01624000 | 2.86348300  |
| C  | 0.21506600  | -0.83615000 | 3.82464900  |
| H  | -0.33083800 | -0.05012600 | 3.28449800  |
| H  | -0.57322000 | -2.31224800 | 2.43633100  |
| H  | 2.90296000  | 1.45801400  | 6.88387500  |
| H  | 4.89136100  | 1.36922700  | 5.44960700  |
| H  | 0.76606200  | 0.41702400  | 6.15832100  |
| H  | 5.73432500  | -0.39665000 | 1.00607600  |
| H  | 3.62233200  | -1.50428300 | 0.35189600  |
| H  | 0.65161900  | -0.59869300 | 1.17888800  |
| H  | 1.41150200  | -2.29302300 | 0.91661500  |
| N  | 6.32612800  | 0.80602600  | 3.18889800  |
| O  | 6.67519100  | 1.02988400  | 4.35804500  |
| O  | 7.06110900  | 1.05845400  | 2.21929100  |
| C  | -4.62824500 | -1.84925200 | 1.56704500  |
| C  | -5.75457800 | -2.32329100 | 0.86404500  |
| C  | -4.60543400 | -1.89246400 | 2.97450200  |
| C  | -6.83554000 | -2.84347900 | 1.58400700  |
| C  | -5.70729200 | -2.41758900 | 3.65848700  |
| C  | -6.82936800 | -2.90295300 | 2.98087000  |
| H  | -7.70593500 | -3.20626300 | 1.03940400  |
| H  | -5.68857100 | -2.44564600 | 4.74699000  |
| C  | -2.96681500 | 4.44342500  | -1.02279200 |
| C  | -3.69147500 | 4.69861600  | -2.20380300 |
| C  | -2.91053900 | 5.40938100  | 0.00034300  |
| C  | -4.34617200 | 5.92710000  | -2.34308700 |
| C  | -3.57939000 | 6.62550600  | -0.17728400 |
| C  | -4.29882500 | 6.90367100  | -1.34346900 |
| H  | -4.90852000 | 6.12464100  | -3.25449500 |
| H  | -3.53897900 | 7.37172000  | 0.61486600  |
| C  | 3.60178400  | 2.01765200  | -1.55567300 |



|   |             |             |             |
|---|-------------|-------------|-------------|
| C | 4.40977400  | 2.13109600  | -2.70206800 |
| C | 4.10605700  | 2.39623200  | -0.28951100 |
| C | 5.74340000  | 2.53465100  | -2.55325400 |
| C | 5.44673500  | 2.77312200  | -0.18255000 |
| C | 6.28666400  | 2.82849700  | -1.30002800 |
| H | 6.37366900  | 2.60890200  | -3.43845000 |
| H | 5.85542800  | 2.99754600  | 0.79950300  |
| C | 0.80185800  | -4.42394800 | -2.05962200 |
| C | 0.32134900  | -4.80336700 | -3.33117300 |
| C | 1.62683000  | -5.29736700 | -1.32576300 |
| C | 0.68836500  | -6.04958400 | -3.84927800 |
| C | 1.97010900  | -6.53615900 | -1.87991700 |
| C | 1.51549900  | -6.92762700 | -3.14190400 |
| H | 0.31647800  | -6.34186600 | -4.83016600 |
| H | 2.60691400  | -7.21083500 | -1.30978300 |
| C | 2.13268900  | -4.91080700 | 0.04488400  |
| H | 2.77240900  | -4.02198600 | -0.00307500 |
| H | 1.30331700  | -4.66504600 | 0.71767000  |
| H | 2.71288800  | -5.72156800 | 0.49791300  |
| C | -0.59293500 | -3.88245000 | -4.10557800 |
| H | -1.54866700 | -3.74857400 | -3.58576500 |
| H | -0.17423600 | -2.87512900 | -4.20132500 |
| H | -0.79608200 | -4.27748500 | -5.10669300 |
| C | 1.92800500  | -8.25350800 | -3.74012200 |
| H | 2.80915300  | -8.14224800 | -4.38725100 |
| H | 2.18558600  | -8.98262500 | -2.96343900 |
| H | 1.12851200  | -8.68259200 | -4.35541800 |
| C | -3.40279800 | -1.38272000 | 3.73397700  |
| H | -2.52363700 | -2.00687400 | 3.53936000  |
| H | -3.13334500 | -0.36786200 | 3.42237800  |
| H | -3.58539200 | -1.37935300 | 4.81392900  |
| C | -5.79338600 | -2.25907200 | -0.64526100 |
| H | -5.64571800 | -1.23275200 | -0.99993900 |
| H | -4.98616100 | -2.85402000 | -1.08726400 |
| H | -6.74854600 | -2.62810300 | -1.03365600 |
| C | -7.99394300 | -3.50066000 | 3.73753700  |
| H | -7.85495700 | -4.57904700 | 3.89707400  |
| H | -8.11025900 | -3.04021600 | 4.72546800  |
| H | -8.93587900 | -3.37314100 | 3.19178000  |
| C | -2.14098700 | 5.12774900  | 1.27030100  |
| H | -2.50884600 | 4.21839200  | 1.75938700  |
| H | -1.07940400 | 4.95644800  | 1.05723600  |
| H | -2.22154200 | 5.95971100  | 1.97800600  |
| C | -3.76589200 | 3.64999900  | -3.28945000 |

|   |             |             |             |
|---|-------------|-------------|-------------|
| H | -2.76784600 | 3.33403200  | -3.61209100 |
| H | -4.25850700 | 2.74027500  | -2.92715700 |
| H | -4.31646100 | 4.01977200  | -4.16111900 |
| C | -4.98492400 | 8.23801700  | -1.53173300 |
| H | -4.32267300 | 8.96150200  | -2.02745500 |
| H | -5.88278300 | 8.14360500  | -2.15346600 |
| H | -5.28244200 | 8.67610300  | -0.57202400 |
| C | 3.20997200  | 2.43181100  | 0.92812800  |
| H | 2.55116100  | 3.30887000  | 0.88759700  |
| H | 2.55220700  | 1.56158500  | 0.99051700  |
| H | 3.79836600  | 2.48974600  | 1.84761900  |
| C | 3.85126700  | 1.83000200  | -4.07617600 |
| H | 3.74385700  | 0.75298000  | -4.25031800 |
| H | 2.85205300  | 2.26245400  | -4.19709200 |
| H | 4.50150700  | 2.23405500  | -4.85992900 |
| C | 7.73765600  | 3.21935800  | -1.13750700 |
| H | 8.18216300  | 2.70960600  | -0.27476300 |
| H | 8.32590600  | 2.96676500  | -2.02696400 |
| H | 7.84605900  | 4.29922800  | -0.96591600 |
| H | 0.79548900  | -2.88812400 | 3.40288600  |
| H | -0.39289500 | -1.11545400 | 4.69380700  |

**cat4/b14**

|   |             |             |             |
|---|-------------|-------------|-------------|
| C | -0.44805400 | -2.82770500 | -1.22495600 |
| C | -1.27609000 | -4.00407100 | -1.09367300 |
| C | -2.49353000 | -3.58224200 | -0.65266400 |
| C | -2.42526400 | -2.14182400 | -0.54559200 |
| N | -1.16910200 | -1.71186600 | -0.89246800 |
| H | -0.94244000 | -5.01345500 | -1.28982600 |
| H | -3.37062200 | -4.17290700 | -0.42614600 |
| C | -2.88369600 | 2.12047500  | -0.69833300 |
| C | -4.28128400 | 2.16866800  | -0.32131900 |
| C | -4.65500400 | 0.89150300  | -0.04087900 |
| C | -3.49334300 | 0.05752000  | -0.27247100 |
| N | -2.43504000 | 0.83029000  | -0.66242200 |
| H | -4.87444700 | 3.07166200  | -0.27649400 |
| H | -5.62143100 | 0.52465300  | 0.27582200  |
| C | 2.44635200  | 0.34369900  | -1.38840700 |
| C | 3.60761600  | -0.49462800 | -1.60305900 |
| C | 3.15476700  | -1.76764100 | -1.76259100 |
| C | 1.72165100  | -1.72952900 | -1.57422600 |
| N | 1.31912100  | -0.43782600 | -1.34673100 |
| H | 4.62712300  | -0.13978100 | -1.64153600 |
| H | 3.72491300  | -2.66356700 | -1.96427300 |

|    |             |             |             |
|----|-------------|-------------|-------------|
| C  | 1.33478200  | 2.53638800  | -1.34442700 |
| C  | 1.35563800  | 3.97471100  | -1.50361600 |
| C  | 0.06219900  | 4.39357100  | -1.45826000 |
| C  | -0.74963500 | 3.21348200  | -1.24572500 |
| N  | 0.04735700  | 2.10096200  | -1.21180700 |
| H  | 2.25486300  | 4.56035600  | -1.63812400 |
| H  | -0.32619100 | 5.39918500  | -1.54215500 |
| C  | 0.90363600  | -2.86102700 | -1.57630200 |
| C  | -2.12462500 | 3.24979400  | -1.01128900 |
| C  | -3.50850800 | -1.33643300 | -0.18420600 |
| C  | 2.48513100  | 1.74309500  | -1.33556200 |
| Fe | -0.54130400 | 0.18990800  | -0.96209900 |
| Cl | -1.00336900 | 0.14787100  | -3.30648600 |
| O  | -0.29587400 | 0.33282300  | 0.72183900  |
| H  | 0.31987700  | -0.29700000 | 1.51377400  |
| C  | 4.09765500  | 1.01352600  | 3.66362600  |
| C  | 4.89984700  | 0.56556300  | 2.61047800  |
| C  | 4.39972700  | -0.32504800 | 1.65387000  |
| C  | 3.08084200  | -0.73695900 | 1.74147900  |
| C  | 2.22505300  | -0.27227400 | 2.76600800  |
| C  | 2.77492200  | 0.59628700  | 3.73399000  |
| H  | 4.51408100  | 1.69389700  | 4.39664800  |
| H  | 5.03061200  | -0.64415100 | 0.83520900  |
| H  | 2.67635400  | -1.39411000 | 0.98059800  |
| H  | 2.14647900  | 0.95326800  | 4.54260100  |
| C  | 0.80842100  | -0.72031100 | 2.77749800  |
| C  | -0.16463100 | 0.07348400  | 3.59518900  |
| C  | -0.27905700 | 1.46478600  | 3.38218900  |
| C  | -1.03678000 | -0.51932000 | 4.52479200  |
| C  | -1.21942000 | 2.22373600  | 4.07262400  |
| C  | -1.98433300 | 0.24185200  | 5.21189500  |
| H  | -0.97556400 | -1.58729800 | 4.70582000  |
| C  | -2.08279500 | 1.61639300  | 4.99042800  |
| H  | -1.29176000 | 3.29087600  | 3.87788100  |
| H  | -2.64765900 | -0.24543100 | 5.92311600  |
| H  | -2.82622000 | 2.20747900  | 5.51975800  |
| C  | -4.78258800 | -2.00066600 | 0.24368200  |
| C  | -5.70689500 | -2.43335500 | -0.72976800 |
| C  | -5.06240000 | -2.17700700 | 1.61345800  |
| C  | -6.89084200 | -3.05227700 | -0.31634000 |
| C  | -6.26203500 | -2.79664100 | 1.98474600  |
| C  | -7.18693400 | -3.24204400 | 1.03711200  |
| H  | -7.60119800 | -3.38942600 | -1.06981000 |
| H  | -6.47707200 | -2.93366300 | 3.04347100  |

|   |             |             |             |
|---|-------------|-------------|-------------|
| C | 1.49854700  | -4.17338600 | -1.98732000 |
| C | 2.26013800  | -4.94132100 | -1.08494700 |
| C | 1.28888300  | -4.62831900 | -3.30652300 |
| C | 2.80119800  | -6.15758400 | -1.51835300 |
| C | 1.84899000  | -5.84821000 | -3.69902900 |
| C | 2.60553600  | -6.62874700 | -2.81907900 |
| H | 3.38991800  | -6.74982700 | -0.81926000 |
| H | 1.69208400  | -6.19585000 | -4.71908700 |
| C | -2.81150400 | 4.58018500  | -1.02620900 |
| C | -3.41771600 | 5.03930800  | -2.21096600 |
| C | -2.85751900 | 5.36072100  | 0.14574100  |
| C | -4.05892300 | 6.28299100  | -2.20560800 |
| C | -3.50983800 | 6.59758800  | 0.11114700  |
| C | -4.11264700 | 7.07723000  | -1.05620800 |
| H | -4.52897600 | 6.63814800  | -3.12140700 |
| H | -3.54922800 | 7.20009600  | 1.01746500  |
| C | 3.82141700  | 2.40199400  | -1.18262700 |
| C | 4.16560600  | 2.92160800  | 0.08847100  |
| C | 4.76313000  | 2.43207700  | -2.22850100 |
| C | 5.47850100  | 3.33257500  | 0.31925800  |
| C | 6.07182200  | 2.85417100  | -1.95325700 |
| C | 6.45943300  | 3.25997500  | -0.67545100 |
| H | 5.75934300  | 3.66660300  | 1.31590900  |
| H | 6.80811600  | 2.84192500  | -2.75563700 |
| C | 3.13902600  | 3.03621600  | 1.19136600  |
| H | 2.41081900  | 3.82474300  | 0.96721000  |
| H | 2.56927200  | 2.11093300  | 1.31137900  |
| H | 3.61717600  | 3.27333200  | 2.14494400  |
| C | 4.38588000  | 2.00897300  | -3.63257700 |
| H | 4.44456600  | 0.92215700  | -3.76532900 |
| H | 3.35586600  | 2.29473700  | -3.86891700 |
| H | 5.05349500  | 2.47096600  | -4.36855600 |
| C | 7.89553400  | 3.57794500  | -0.33467900 |
| H | 8.26241600  | 2.85919800  | 0.40926600  |
| H | 8.54469700  | 3.52403800  | -1.21561700 |
| H | 7.99748400  | 4.57953700  | 0.10255900  |
| C | -2.21461700 | 4.85807400  | 1.41842700  |
| H | -2.62902500 | 3.88827500  | 1.71674000  |
| H | -1.13832600 | 4.70181800  | 1.27887800  |
| H | -2.35805700 | 5.56550100  | 2.24245400  |
| C | -3.38151700 | 4.18862900  | -3.45947600 |
| H | -2.35429800 | 3.91925800  | -3.72906400 |
| H | -3.90908000 | 3.24016200  | -3.30450500 |
| H | -3.84190000 | 4.70674100  | -4.30752700 |

|   |             |             |             |
|---|-------------|-------------|-------------|
| C | -4.78000900 | 8.43389200  | -1.08147100 |
| H | -4.06374500 | 9.22681000  | -1.33833500 |
| H | -5.58489100 | 8.47192500  | -1.82449300 |
| H | -5.20838400 | 8.68928600  | -0.10529800 |
| C | -4.08407100 | -1.72305700 | 2.67315700  |
| H | -3.20726000 | -2.37941100 | 2.71278200  |
| H | -3.70538700 | -0.71517100 | 2.47877400  |
| H | -4.54627300 | -1.72903500 | 3.66603300  |
| C | -5.41920700 | -2.22826400 | -2.19945200 |
| H | -5.20807300 | -1.17511200 | -2.41644000 |
| H | -4.53060800 | -2.78814100 | -2.51294500 |
| H | -6.26490600 | -2.54873900 | -2.81717300 |
| C | -8.49080100 | -3.87886300 | 1.46230600  |
| H | -8.40340800 | -4.35517000 | 2.44545800  |
| H | -9.29555300 | -3.13374700 | 1.53207600  |
| H | -8.81832700 | -4.64072900 | 0.74522400  |
| C | 0.46364900  | -3.81345400 | -4.27627100 |
| H | -0.59561200 | -3.81955900 | -3.99267000 |
| H | 0.76211600  | -2.75981500 | -4.28000600 |
| H | 0.54759000  | -4.20834200 | -5.29448100 |
| C | 2.51106900  | -4.45634000 | 0.32308000  |
| H | 3.28800000  | -3.68166200 | 0.34181000  |
| H | 1.61491600  | -4.01265200 | 0.76207900  |
| H | 2.83857900  | -5.27293300 | 0.97387500  |
| C | 3.16970800  | -7.96193700 | -3.25560100 |
| H | 4.07985500  | -8.21503600 | -2.69972600 |
| H | 2.44986200  | -8.77518000 | -3.08719300 |
| H | 3.41461300  | -7.96380000 | -4.32410700 |
| C | 0.62859100  | -2.21082200 | 2.82916700  |
| C | -0.49487600 | -2.80645600 | 2.23371900  |
| C | 1.52059500  | -3.03781400 | 3.53421000  |
| C | -0.73234500 | -4.17504900 | 2.35540900  |
| H | -1.17171500 | -2.18073600 | 1.66530700  |
| C | 1.28647800  | -4.40861600 | 3.65478100  |
| H | 2.39754300  | -2.59742100 | 3.99993800  |
| C | 0.15570200  | -4.98328100 | 3.07058500  |
| H | -1.60055800 | -4.60655700 | 1.86746800  |
| H | 1.98938600  | -5.02700400 | 4.20858000  |
| H | -0.02470200 | -6.05179100 | 3.15900300  |
| H | 0.35245900  | 1.93552400  | 2.63669400  |
| N | 6.25098600  | 1.08070300  | 2.46992200  |
| O | 6.97119700  | 0.60792500  | 1.58362200  |
| O | 6.61346500  | 1.98711300  | 3.23318700  |

**cat4/b15**

|    |             |             |             |
|----|-------------|-------------|-------------|
| C  | -2.83987100 | 2.21854600  | 0.00983900  |
| C  | -4.13554400 | 2.47719100  | -0.58165800 |
| C  | -4.85561500 | 1.32856700  | -0.46821300 |
| C  | -3.99090000 | 0.35263500  | 0.16142700  |
| N  | -2.77514900 | 0.91768600  | 0.43157900  |
| H  | -4.43968100 | 3.42562100  | -1.00242800 |
| H  | -5.87117300 | 1.13531500  | -0.78512500 |
| C  | -1.60931700 | -3.00403000 | 1.31247800  |
| C  | -2.63978900 | -4.01414800 | 1.19937300  |
| C  | -3.80675600 | -3.35875600 | 0.95262500  |
| C  | -3.48149300 | -1.94875300 | 0.86874500  |
| N  | -2.15418800 | -1.76496800 | 1.13829400  |
| H  | -2.46607800 | -5.07639100 | 1.30700700  |
| H  | -4.79605100 | -3.77069400 | 0.80830300  |
| C  | 0.95708700  | 1.96664100  | 2.00599600  |
| C  | 1.19669700  | 3.38863300  | 2.08954100  |
| C  | 0.20043600  | 3.99940100  | 1.38852400  |
| C  | -0.67205800 | 2.95407300  | 0.90370600  |
| N  | -0.18835200 | 1.72855500  | 1.28647300  |
| H  | 2.03966900  | 3.83913500  | 2.59481700  |
| H  | 0.04655100  | 5.05566200  | 1.21677700  |
| C  | 1.59049800  | -0.37203700 | 2.39719700  |
| C  | 2.56762300  | -1.39158500 | 2.70615600  |
| C  | 2.02474700  | -2.58310700 | 2.33367800  |
| C  | 0.68083900  | -2.30776400 | 1.87038400  |
| N  | 0.45591900  | -0.95595100 | 1.89905600  |
| H  | 3.54615800  | -1.20050400 | 3.12402200  |
| H  | 2.47656000  | -3.56357800 | 2.37414500  |
| C  | -1.86918300 | 3.20002600  | 0.22470100  |
| C  | -0.26091500 | -3.29117200 | 1.54093300  |
| C  | -4.36743000 | -0.96827900 | 0.41768900  |
| C  | 1.81578800  | 0.99943300  | 2.53223400  |
| Fe | -1.14382000 | -0.02823100 | 1.12770300  |
| Cl | -1.95890500 | 0.34074700  | 3.34236800  |
| O  | -0.69101000 | -0.40906500 | -0.46255900 |
| H  | 0.20764300  | -0.05267600 | -1.16213100 |
| C  | 1.03248900  | 0.08625600  | -2.27377800 |
| C  | 1.79272100  | -1.19023800 | -2.18099300 |
| C  | 1.81201900  | -2.15695900 | -3.20794800 |
| C  | 2.48350400  | -1.48980300 | -0.98608500 |
| C  | 2.46505400  | -3.37085400 | -3.04903900 |
| H  | 1.30420000  | -1.94530100 | -4.14231300 |
| C  | 3.13716800  | -2.69730400 | -0.81028000 |

|   |             |             |             |
|---|-------------|-------------|-------------|
| H | 2.46004500  | -0.77539800 | -0.17125300 |
| C | 3.11023300  | -3.64411000 | -1.83983500 |
| H | 2.47015600  | -4.11619400 | -3.83498000 |
| H | 3.62520900  | -2.93489300 | 0.12470100  |
| C | -0.05505100 | 0.19070600  | -3.29884100 |
| C | -1.06900900 | -0.78872700 | -3.36587100 |
| C | -0.14387300 | 1.28797400  | -4.17313100 |
| C | -2.11457300 | -0.67551200 | -4.27713400 |
| H | -1.04238000 | -1.61944500 | -2.66967400 |
| C | -1.20074900 | 1.40684800  | -5.07921000 |
| H | 0.62443700  | 2.05498700  | -4.13815600 |
| C | -2.18986900 | 0.42531700  | -5.13860900 |
| H | -2.88523500 | -1.44185200 | -4.30384000 |
| H | -1.24616100 | 2.26993200  | -5.73960000 |
| C | 1.74675000  | 1.35451300  | -2.00271700 |
| C | 3.04658900  | 1.67234900  | -2.24365700 |
| H | 1.10528700  | 2.13350300  | -1.59712600 |
| C | 3.95367200  | 0.75711700  | -2.99619600 |
| C | 5.14691600  | 0.28507600  | -2.42824800 |
| C | 3.63391100  | 0.36460300  | -4.30433300 |
| C | 5.98121000  | -0.57872600 | -3.13647600 |
| H | 5.40515900  | 0.58654100  | -1.41792600 |
| C | 4.47229200  | -0.49163400 | -5.01862500 |
| H | 2.70795600  | 0.71956400  | -4.74767500 |
| C | 5.64687700  | -0.97062000 | -4.43564500 |
| H | 6.88977400  | -0.95292900 | -2.67121600 |
| H | 4.20206100  | -0.79194900 | -6.02805300 |
| H | 6.29552700  | -1.64706100 | -4.98649700 |
| C | 3.59368100  | 2.99269900  | -1.84509600 |
| C | 4.68093200  | 3.56806400  | -2.53038900 |
| C | 3.03120700  | 3.72351700  | -0.78166700 |
| C | 5.17046300  | 4.82512200  | -2.17506300 |
| H | 5.13805200  | 3.02602800  | -3.35227000 |
| C | 3.51574000  | 4.98005400  | -0.43052100 |
| H | 2.22513800  | 3.29287400  | -0.20309400 |
| C | 4.59051000  | 5.54156900  | -1.12523100 |
| H | 6.00899400  | 5.24713200  | -2.72456200 |
| H | 3.05795000  | 5.50846300  | 0.40194700  |
| H | 4.97737700  | 6.51852700  | -0.84615000 |
| C | -5.77840000 | -1.36991800 | 0.11788600  |
| C | -6.76881800 | -1.21046000 | 1.10659100  |
| C | -6.11011900 | -1.90141400 | -1.14322600 |
| C | -8.08229500 | -1.59416000 | 0.81651500  |
| C | -7.43603100 | -2.27065900 | -1.39551300 |

|   |             |             |             |
|---|-------------|-------------|-------------|
| C | -8.43551000 | -2.12362000 | -0.42889900 |
| H | -8.84778800 | -1.47704200 | 1.58218500  |
| H | -7.69320500 | -2.68356900 | -2.36977000 |
| C | -2.17897500 | 4.61218100  | -0.17145000 |
| C | -1.64086000 | 5.15248500  | -1.35596300 |
| C | -3.00497400 | 5.40334900  | 0.65506900  |
| C | -1.95234000 | 6.47175100  | -1.70458100 |
| C | -3.28750800 | 6.71879800  | 0.27307600  |
| C | -2.77148400 | 7.27117100  | -0.90342800 |
| H | -1.54246400 | 6.88314000  | -2.62572900 |
| H | -3.92621600 | 7.32712800  | 0.91174100  |
| C | 3.03283800  | 1.45650900  | 3.27640600  |
| C | 4.28835800  | 1.53038500  | 2.64402300  |
| C | 2.89797000  | 1.82623500  | 4.63215500  |
| C | 5.39354100  | 1.97828400  | 3.37828000  |
| C | 4.02711200  | 2.26549900  | 5.32943000  |
| C | 5.28425000  | 2.34704200  | 4.72070700  |
| H | 6.36148200  | 2.04341300  | 2.88371000  |
| H | 3.92172600  | 2.55351700  | 6.37434900  |
| C | 0.24616700  | -4.67722100 | 1.29101800  |
| C | 0.39006800  | -5.07953500 | -0.05837800 |
| C | 0.68940200  | -5.51984700 | 2.32628300  |
| C | 1.08864100  | -6.25282800 | -0.34226400 |
| C | 1.39031100  | -6.68868300 | 1.99659200  |
| C | 1.64454100  | -7.04233800 | 0.67008200  |
| H | 1.26199500  | -6.52580900 | -1.38068000 |
| H | 1.77053500  | -7.31897100 | 2.79919700  |
| C | -3.57806300 | 4.83897800  | 1.93539100  |
| H | -4.32834700 | 4.06736100  | 1.72675800  |
| H | -2.80304400 | 4.35496400  | 2.53949800  |
| H | -4.05049800 | 5.62386200  | 2.53560300  |
| C | -0.72405500 | 4.33251100  | -2.23300800 |
| H | 0.27481600  | 4.25499300  | -1.78545400 |
| H | -1.09356400 | 3.31167400  | -2.36930400 |
| H | -0.60724000 | 4.78940900  | -3.22167800 |
| C | -3.06524400 | 8.70565800  | -1.28043900 |
| H | -2.33259900 | 9.39334900  | -0.83552300 |
| H | -3.02812700 | 8.85105400  | -2.36610900 |
| H | -4.05591200 | 9.01864100  | -0.93082400 |
| C | 4.46257300  | 1.11429900  | 1.20214700  |
| H | 4.58585900  | 0.02685800  | 1.11553300  |
| H | 3.59614600  | 1.37988800  | 0.59362500  |
| H | 5.34379700  | 1.59089800  | 0.76017500  |
| C | 1.54812900  | 1.76647700  | 5.30986500  |



|   |              |             |             |
|---|--------------|-------------|-------------|
| H | 0.86476200   | 2.51763500  | 4.89653100  |
| H | 1.05529000   | 0.80168900  | 5.14912800  |
| H | 1.63958000   | 1.94072100  | 6.38731600  |
| C | 6.49581700   | 2.79640400  | 5.50568100  |
| H | 6.95681700   | 1.95622900  | 6.04341900  |
| H | 7.26359300   | 3.22329700  | 4.85050400  |
| H | 6.23140700   | 3.55226900  | 6.25443600  |
| C | -0.18356500  | -4.25033500 | -1.18416900 |
| H | -1.27980600  | -4.28632300 | -1.17836600 |
| H | 0.09285500   | -3.19631800 | -1.09045400 |
| H | 0.16630200   | -4.61403300 | -2.15329200 |
| C | 0.43497700   | -5.16768600 | 3.77644400  |
| H | 1.14088100   | -4.41500800 | 4.14672500  |
| H | -0.56637000  | -4.74445500 | 3.90921300  |
| H | 0.52546300   | -6.05390100 | 4.41434200  |
| C | 2.53382400   | -8.20642100 | 0.30493300  |
| H | 2.03000500   | -8.90635800 | -0.37391200 |
| H | 3.42478100   | -7.83195200 | -0.21513200 |
| H | 2.85909300   | -8.76429200 | 1.19002800  |
| C | -5.04334500  | -2.07133900 | -2.20095200 |
| H | -4.52278000  | -1.12690800 | -2.39532100 |
| H | -4.27640100  | -2.78397600 | -1.87419700 |
| H | -5.47139300  | -2.43274900 | -3.14234700 |
| C | -6.40694900  | -0.62656400 | 2.45248700  |
| H | -5.58698900  | -1.18068100 | 2.92261200  |
| H | -6.04941000  | 0.40464900  | 2.34840700  |
| H | -7.26636400  | -0.62817700 | 3.13141300  |
| C | -9.86909200  | -2.49765300 | -0.73133900 |
| H | -10.43933300 | -1.63180600 | -1.09577900 |
| H | -9.92798500  | -3.27327800 | -1.50340300 |
| H | -10.38389500 | -2.86990700 | 0.16206000  |
| H | -3.01428300  | 0.51664600  | -5.84157000 |
| N | 3.70866800   | -4.94945300 | -1.62488600 |
| O | 4.31251700   | -5.15393300 | -0.56576100 |
| O | 3.57009500   | -5.81110900 | -2.50550300 |

**[cat4]K/b1**

|   |             |            |             |
|---|-------------|------------|-------------|
| C | -2.05169100 | 1.69084300 | -0.91749800 |
| C | -2.49098000 | 3.04514900 | -1.16486400 |
| C | -1.37839700 | 3.83427200 | -1.12518400 |
| C | -0.25889800 | 2.96643700 | -0.84497800 |
| N | -0.69287700 | 1.66964200 | -0.70963400 |
| H | -3.51365900 | 3.33145000 | -1.36780000 |
| H | -1.30400900 | 4.90116700 | -1.28434600 |

|    |             |             |             |
|----|-------------|-------------|-------------|
| C  | 3.34503600  | 0.78961800  | 0.04092100  |
| C  | 4.21482600  | 1.93846900  | 0.18430400  |
| C  | 3.46614800  | 3.03654300  | -0.10250500 |
| C  | 2.12832900  | 2.56596500  | -0.39776700 |
| N  | 2.08787700  | 1.19929500  | -0.30912300 |
| H  | 5.26071200  | 1.88556600  | 0.45240800  |
| H  | 3.76756300  | 4.07469700  | -0.11374400 |
| C  | -1.17484200 | -2.52341300 | -0.77068000 |
| C  | -2.53725200 | -2.98834300 | -0.89741200 |
| C  | -3.33369800 | -1.88433000 | -0.87736300 |
| C  | -2.45928500 | -0.73600900 | -0.77531600 |
| N  | -1.15338000 | -1.15575200 | -0.66590600 |
| H  | -2.82356800 | -4.02657000 | -0.99103700 |
| H  | -4.41021200 | -1.83000900 | -0.95946100 |
| C  | 1.23267700  | -2.91809700 | -0.53416700 |
| C  | 2.37869500  | -3.78884700 | -0.39999300 |
| C  | 3.43525000  | -3.00086300 | -0.06456000 |
| C  | 2.95059400  | -1.63784100 | -0.03498800 |
| N  | 1.60715600  | -1.61597600 | -0.31275700 |
| H  | 2.35149700  | -4.86091700 | -0.53587900 |
| H  | 4.45930000  | -3.29024300 | 0.12507300  |
| C  | -2.90752000 | 0.58217800  | -0.90366400 |
| C  | 3.77255500  | -0.53223900 | 0.19074100  |
| C  | 1.05727700  | 3.41310500  | -0.68789400 |
| C  | -0.06399900 | -3.37140000 | -0.77803100 |
| Fe | 0.47259100  | 0.01184900  | -0.45917300 |
| Cl | 0.74641800  | -0.01816800 | -2.77776800 |
| O  | 0.30476600  | 0.14299700  | 1.26246300  |
| C  | 1.33035900  | 4.87844900  | -0.83487200 |
| C  | 1.12128100  | 5.75620000  | 0.24529400  |
| C  | 1.79687100  | 5.37394000  | -2.06953800 |
| C  | 1.37861000  | 7.12062400  | 0.07885700  |
| C  | 2.03978800  | 6.74516000  | -2.19762600 |
| C  | 1.84047000  | 7.63443700  | -1.13648900 |
| H  | 1.21683700  | 7.79714400  | 0.91615000  |
| H  | 2.39353900  | 7.12916400  | -3.15250900 |
| C  | -4.36512400 | 0.81731900  | -1.17135500 |
| C  | -4.85556600 | 0.64995100  | -2.48558300 |
| C  | -5.23805600 | 1.21503300  | -0.14176900 |
| C  | -6.21299100 | 0.87208300  | -2.73326200 |
| C  | -6.59204400 | 1.42074200  | -0.42944900 |
| C  | -7.10001800 | 1.25047300  | -1.71912500 |
| H  | -6.58878200 | 0.74698900  | -3.74701300 |
| H  | -7.26263900 | 1.71854500  | 0.37431300  |

|   |             |             |             |
|---|-------------|-------------|-------------|
| C | -0.26902900 | -4.81181700 | -1.13976300 |
| C | -0.29507400 | -5.15517700 | -2.50871500 |
| C | -0.43398900 | -5.80458300 | -0.15620000 |
| C | -0.47929700 | -6.49441000 | -2.86454000 |
| C | -0.61802400 | -7.13310100 | -0.55598600 |
| C | -0.63930700 | -7.49889400 | -1.90442500 |
| H | -0.49982200 | -6.75948400 | -3.91999900 |
| H | -0.74852100 | -7.89936800 | 0.20577400  |
| C | 5.19664600  | -0.78045400 | 0.58287800  |
| C | 6.21107800  | -0.79162700 | -0.39419200 |
| C | 5.50774400  | -1.01753000 | 1.93575900  |
| C | 7.52958100  | -1.03348800 | 0.00569100  |
| C | 6.83838600  | -1.25363500 | 2.29457500  |
| C | 7.86433600  | -1.26191900 | 1.34417100  |
| H | 8.31426600  | -1.04776700 | -0.74837200 |
| H | 7.07935700  | -1.43776000 | 3.33998700  |
| C | 2.03260100  | 4.43565700  | -3.23061600 |
| H | 2.85150100  | 3.73962100  | -3.01366300 |
| H | 1.15256300  | 3.81518100  | -3.43297800 |
| H | 2.28574600  | 4.98816600  | -4.14066300 |
| C | 0.61098400  | 5.23721300  | 1.57232400  |
| H | -0.44576800 | 4.94263600  | 1.48985600  |
| H | 1.18426700  | 4.36016600  | 1.89796700  |
| H | 0.68083500  | 6.00126400  | 2.35300800  |
| C | 2.14630100  | 9.10619000  | -1.29168000 |
| H | 1.55505700  | 9.71552500  | -0.59954200 |
| H | 3.20516100  | 9.31335500  | -1.08637500 |
| H | 1.94037800  | 9.45304500  | -2.31025700 |
| C | 5.87608300  | -0.55525000 | -1.84897000 |
| H | 5.10224400  | -1.24957200 | -2.19628000 |
| H | 5.47767400  | 0.45409500  | -2.00649200 |
| H | 6.75918100  | -0.67681900 | -2.48380600 |
| C | 4.41396500  | -1.03101200 | 2.98027200  |
| H | 3.81527300  | -0.11315400 | 2.94162800  |
| H | 3.71910100  | -1.86310400 | 2.81044800  |
| H | 4.82881500  | -1.13280000 | 3.98816100  |
| C | 9.30102900  | -1.48596300 | 1.75627100  |
| H | 9.87920800  | -1.95992900 | 0.95551700  |
| H | 9.79667800  | -0.53553000 | 1.99622600  |
| H | 9.36966100  | -2.12134300 | 2.64614600  |
| C | -0.14169800 | -4.09118700 | -3.57161600 |
| H | -0.98744200 | -3.39338900 | -3.55786300 |
| H | 0.75248800  | -3.47932100 | -3.41041100 |
| H | -0.08329000 | -4.53677400 | -4.56951900 |

|   |             |             |             |
|---|-------------|-------------|-------------|
| C | -0.80460900 | -8.94300000 | -2.31792900 |
| H | -1.28631400 | -9.53442400 | -1.53189800 |
| H | -1.40813800 | -9.03259200 | -3.22824200 |
| H | 0.16807400  | -9.40766000 | -2.52824500 |
| C | -0.41479700 | -5.45078900 | 1.31284800  |
| H | 0.55704400  | -5.03927700 | 1.61043400  |
| H | -1.16883800 | -4.69163500 | 1.55137000  |
| H | -0.61315500 | -6.32861700 | 1.93562100  |
| C | -4.73379000 | 1.45258700  | 1.26349800  |
| H | -3.95897900 | 0.72525100  | 1.52541400  |
| H | -4.31076800 | 2.46551400  | 1.35510700  |
| H | -5.53239700 | 1.36008500  | 2.00465600  |
| C | -3.93132200 | 0.23836900  | -3.60901300 |
| H | -3.02679500 | 0.85571300  | -3.63507800 |
| H | -3.59207700 | -0.79679000 | -3.48399700 |
| H | -4.43274600 | 0.31627400  | -4.57859400 |
| C | -8.57029700 | 1.44192500  | -2.00998900 |
| H | -8.72868800 | 1.87905700  | -3.00221300 |
| H | -9.10420000 | 0.48242700  | -1.98974300 |
| H | -9.04539300 | 2.09542800  | -1.27064300 |
| K | -1.32138500 | 1.90212000  | 2.18668000  |
| C | -3.41520000 | -0.45417500 | 4.27167500  |
| C | -2.22435500 | -0.20351500 | 4.97018800  |
| C | -2.24171800 | -1.83926100 | 2.69222300  |
| C | -3.43133000 | -1.29959300 | 3.15216100  |
| H | -4.36766400 | -1.48854300 | 2.64109600  |
| C | -1.00655300 | -1.56962800 | 3.33866600  |
| C | -1.04113000 | -0.76619800 | 4.51104800  |
| C | 0.24739900  | -1.93892700 | 2.71922900  |
| H | 0.40005600  | -0.87513900 | 1.87515900  |
| H | 0.22557100  | -2.76478700 | 2.01397300  |
| H | -2.25047700 | 0.42336400  | 5.85428200  |
| H | -0.11371500 | -0.57614400 | 5.04602100  |
| H | -2.24666400 | -2.43951100 | 1.78841700  |
| N | -4.63752100 | 0.21445800  | 4.68571900  |
| O | -4.55163700 | 1.08129100  | 5.56461900  |
| O | -5.69079800 | -0.09549600 | 4.11896500  |
| H | 1.13938300  | -1.90791500 | 3.34546700  |

**[cat4]K/b2**

|   |             |            |             |
|---|-------------|------------|-------------|
| C | -2.18690400 | 1.48561300 | -1.02469500 |
| C | -2.74318300 | 2.79120000 | -1.29755200 |
| C | -1.71297900 | 3.68316200 | -1.22385600 |
| C | -0.52703300 | 2.92638400 | -0.89916900 |

|    |             |             |             |
|----|-------------|-------------|-------------|
| N  | -0.84047800 | 1.59427800  | -0.77109600 |
| H  | -3.78026500 | 2.97906900  | -1.53836200 |
| H  | -1.73415600 | 4.75163900  | -1.38849200 |
| C  | 3.24203800  | 1.10134500  | 0.08708200  |
| C  | 4.00901300  | 2.32516900  | 0.19982300  |
| C  | 3.16225700  | 3.34802800  | -0.09099700 |
| C  | 1.87127200  | 2.75475500  | -0.37268400 |
| N  | 1.95001000  | 1.39159400  | -0.25425900 |
| H  | 5.05873000  | 2.36948200  | 0.45359700  |
| H  | 3.37067500  | 4.40835200  | -0.12260400 |
| C  | -0.92833500 | -2.62953200 | -0.81241700 |
| C  | -2.23643500 | -3.22081200 | -0.98457000 |
| C  | -3.13233800 | -2.19603200 | -1.00327500 |
| C  | -2.37237000 | -0.96955800 | -0.88172700 |
| N  | -1.03833300 | -1.26508800 | -0.72061300 |
| H  | -2.42158700 | -4.28186300 | -1.07767300 |
| H  | -4.20570300 | -2.24352600 | -1.12235500 |
| C  | 1.49245800  | -2.79759500 | -0.45562600 |
| C  | 2.70486200  | -3.55969800 | -0.25558300 |
| C  | 3.67617100  | -2.67137900 | 0.08798100  |
| C  | 3.07328500  | -1.35547500 | 0.05895100  |
| N  | 1.74043100  | -1.46356000 | -0.25231500 |
| H  | 2.77626800  | -4.63341400 | -0.35843900 |
| H  | 4.71466200  | -2.86403700 | 0.31792900  |
| C  | -2.93584300 | 0.30144100  | -1.03195900 |
| C  | 3.79167100  | -0.17355000 | 0.25206900  |
| C  | 0.73530700  | 3.49584500  | -0.70375200 |
| C  | 0.25529500  | -3.37091500 | -0.75685200 |
| Fe | 0.46135000  | 0.05433800  | -0.46061000 |
| Cl | 0.84911700  | 0.03888600  | -2.76632800 |
| O  | 0.20861300  | 0.16438900  | 1.25465900  |
| C  | 0.87776500  | 4.97696300  | -0.87607100 |
| C  | 0.58215400  | 5.85311500  | 0.18425500  |
| C  | 1.30878500  | 5.48801300  | -2.11767200 |
| C  | 0.71981700  | 7.23179200  | -0.00673700 |
| C  | 1.43113500  | 6.87245000  | -2.27074700 |
| C  | 1.14531900  | 7.76090800  | -1.22851900 |
| H  | 0.49101700  | 7.90703100  | 0.81578100  |
| H  | 1.75842900  | 7.26804800  | -3.23036900 |
| C  | -4.40211400 | 0.40452700  | -1.33442800 |
| C  | -4.85517500 | 0.14273800  | -2.64737200 |
| C  | -5.32261600 | 0.78204600  | -0.33839500 |
| C  | -6.22126300 | 0.24456900  | -2.92361300 |
| C  | -6.68351100 | 0.86542600  | -0.65410500 |

|   |             |             |             |
|---|-------------|-------------|-------------|
| C | -7.15378300 | 0.59506200  | -1.94064800 |
| H | -6.56798100 | 0.04830900  | -3.93649500 |
| H | -7.38928600 | 1.14819100  | 0.12463500  |
| C | 0.20359300  | -4.82594000 | -1.11718900 |
| C | 0.29372900  | -5.17165600 | -2.48342600 |
| C | 0.06519500  | -5.82928700 | -0.14041300 |
| C | 0.24864600  | -6.52177600 | -2.84191700 |
| C | 0.02385500  | -7.16930500 | -0.54293900 |
| C | 0.11768900  | -7.53615000 | -1.88766100 |
| H | 0.31735200  | -6.78848000 | -3.89496000 |
| H | -0.08565600 | -7.94354800 | 0.21400300  |
| C | 5.25447400  | -0.27169500 | 0.56735100  |
| C | 6.18390900  | -0.43141700 | -0.48103500 |
| C | 5.69567700  | -0.19346500 | 1.90159600  |
| C | 7.54405500  | -0.52145700 | -0.16888800 |
| C | 7.06534800  | -0.28669400 | 2.17098500  |
| C | 8.00529900  | -0.45060300 | 1.14969600  |
| H | 8.26209100  | -0.64839000 | -0.97702200 |
| H | 7.40515900  | -0.23105300 | 3.20354000  |
| C | 1.63514400  | 4.55159700  | -3.25795500 |
| H | 2.50232300  | 3.92538100  | -3.01724800 |
| H | 0.80966600  | 3.86030300  | -3.46087700 |
| H | 1.85751700  | 5.10675800  | -4.17441100 |
| C | 0.10502000  | 5.31571200  | 1.51608300  |
| H | -0.91762400 | 4.91977400  | 1.42644200  |
| H | 0.75491800  | 4.50486900  | 1.86849400  |
| H | 0.08918900  | 6.09870300  | 2.28077200  |
| C | 1.32146600  | 9.25036800  | -1.41263800 |
| H | 0.70451100  | 9.81920500  | -0.70872900 |
| H | 2.36567800  | 9.54799700  | -1.24749700 |
| H | 1.05349400  | 9.56274700  | -2.42807600 |
| C | 5.71751600  | -0.50804000 | -1.91681500 |
| H | 5.10596600  | -1.40148600 | -2.08984300 |
| H | 5.08744700  | 0.34971400  | -2.17799100 |
| H | 6.56630000  | -0.53656400 | -2.60700300 |
| C | 4.70386700  | -0.00808700 | 3.02706700  |
| H | 4.15680800  | 0.93666900  | 2.92018300  |
| H | 3.95221500  | -0.80445900 | 3.02774200  |
| H | 5.20393900  | -0.00631600 | 4.00082400  |
| C | 9.48383600  | -0.51930200 | 1.45515700  |
| H | 10.00027500 | -1.21311700 | 0.78227900  |
| H | 9.95960500  | 0.46318900  | 1.33350500  |
| H | 9.66729000  | -0.84550200 | 2.48458300  |
| C | 0.42759600  | -4.09935700 | -3.54054300 |

|   |             |             |             |
|---|-------------|-------------|-------------|
| H | -0.45143600 | -3.44451000 | -3.55799000 |
| H | 1.28326900  | -3.44327500 | -3.34669600 |
| H | 0.54648600  | -4.53984400 | -4.53534500 |
| C | 0.10457600  | -8.98895400 | -2.30355400 |
| H | -0.33884900 | -9.62552900 | -1.53047000 |
| H | -0.46256700 | -9.13508500 | -3.22992400 |
| H | 1.12299500  | -9.35666700 | -2.48732800 |
| C | -0.04943800 | -5.47608000 | 1.32439700  |
| H | 0.82170100  | -4.90653200 | 1.66824500  |
| H | -0.93303500 | -4.85490400 | 1.51474300  |
| H | -0.13209700 | -6.37435400 | 1.94418500  |
| C | -4.86602200 | 1.13678600  | 1.05872100  |
| H | -4.00488400 | 0.52780200  | 1.34857300  |
| H | -4.57830800 | 2.19843600  | 1.11208900  |
| H | -5.65144000 | 0.96975100  | 1.80175700  |
| C | -3.88338900 | -0.23353000 | -3.74310500 |
| H | -3.01530300 | 0.43421700  | -3.75941700 |
| H | -3.48922600 | -1.24612600 | -3.59583500 |
| H | -4.36686100 | -0.19836400 | -4.72431900 |
| C | -8.62881800 | 0.65593800  | -2.26239200 |
| H | -8.80296200 | 1.05680400  | -3.26732200 |
| H | -9.08117100 | -0.34428200 | -2.23047400 |
| H | -9.17191600 | 1.28303100  | -1.54744600 |
| K | -1.52217600 | 1.85351800  | 2.10745600  |
| C | -3.61270900 | -0.53779500 | 4.25963600  |
| C | -2.41893800 | -0.29047900 | 4.95055400  |
| C | -2.43862300 | -1.86271500 | 2.63304600  |
| C | -3.63155200 | -1.35406900 | 3.11969200  |
| H | -4.57211000 | -1.54820500 | 2.61905500  |
| C | -1.20118400 | -1.59693000 | 3.27435600  |
| C | -1.23112800 | -0.82705100 | 4.46601600  |
| C | 1.34314600  | -2.08823300 | 3.37847000  |
| C | 0.04275700  | -1.97105600 | 2.61126900  |
| H | 2.14697800  | -2.36205400 | 2.68891200  |
| H | 0.19879000  | -0.91530100 | 1.83586200  |
| H | -0.09349700 | -2.74272700 | 1.85762800  |
| H | 1.28977000  | -2.85780200 | 4.16223200  |
| H | -2.44293300 | 0.31337600  | 5.85056200  |
| H | 1.62842100  | -1.14358900 | 3.85622900  |
| H | -0.30761700 | -0.63825800 | 5.00458700  |
| H | -2.44466100 | -2.44767200 | 1.71821300  |
| N | -4.84345100 | 0.09733900  | 4.70920200  |
| O | -4.76922400 | 0.90225200  | 5.64436600  |
| O | -5.89047300 | -0.18118100 | 4.11529900  |

[cat4]K/b3

|    |             |             |             |
|----|-------------|-------------|-------------|
| C  | -1.95034500 | 1.87175400  | -0.94999500 |
| C  | -2.29433300 | 3.24982200  | -1.22121800 |
| C  | -1.14108500 | 3.97197300  | -1.11358800 |
| C  | -0.09174600 | 3.03683500  | -0.77780100 |
| N  | -0.60778400 | 1.76889900  | -0.67494000 |
| H  | -3.28574300 | 3.59589600  | -1.47928900 |
| H  | -0.99413700 | 5.03251500  | -1.26472100 |
| C  | 3.38735200  | 0.63400200  | 0.06219100  |
| C  | 4.32991700  | 1.72602400  | 0.18757300  |
| C  | 3.63127400  | 2.87388800  | -0.01889600 |
| C  | 2.25830200  | 2.48909600  | -0.27404000 |
| N  | 2.13994800  | 1.12467200  | -0.20949200 |
| H  | 5.38394000  | 1.60519000  | 0.39461000  |
| H  | 3.99297600  | 3.89263500  | -0.01600700 |
| C  | -1.35768900 | -2.38111500 | -0.66213200 |
| C  | -2.74434600 | -2.76206500 | -0.81128800 |
| C  | -3.46760800 | -1.60952300 | -0.84753300 |
| C  | -2.52175800 | -0.51797500 | -0.75121100 |
| N  | -1.25056900 | -1.01666000 | -0.58329800 |
| H  | -3.09445300 | -3.78212700 | -0.88638300 |
| H  | -4.53545600 | -1.48781200 | -0.96437100 |
| C  | 1.02121500  | -2.92883300 | -0.40895900 |
| C  | 2.11554700  | -3.87152700 | -0.34204500 |
| C  | 3.23668100  | -3.15511900 | -0.06383400 |
| C  | 2.83972800  | -1.76433000 | 0.00508100  |
| N  | 1.48261800  | -1.65613900 | -0.17535200 |
| H  | 2.01460500  | -4.93749600 | -0.49019300 |
| H  | 4.25055700  | -3.50947400 | 0.05811200  |
| C  | -2.87588900 | 0.81993100  | -0.94797100 |
| C  | 3.74783200  | -0.71405600 | 0.15062700  |
| C  | 1.24208800  | 3.40184000  | -0.56312300 |
| C  | -0.30168200 | -3.29791700 | -0.65958900 |
| Fe | 0.44862700  | 0.04903000  | -0.35516900 |
| Cl | 0.75996600  | -0.05341000 | -2.67932400 |
| O  | 0.21990600  | 0.29001300  | 1.35638800  |
| C  | 1.60210800  | 4.85133500  | -0.68145800 |
| C  | 1.40396700  | 5.72564600  | 0.40318900  |
| C  | 2.13571100  | 5.33758100  | -1.89311500 |
| C  | 1.74106300  | 7.07622900  | 0.26616700  |
| C  | 2.45728100  | 6.69468600  | -1.99222100 |
| C  | 2.27128300  | 7.57978200  | -0.92489600 |
| H  | 1.58796000  | 7.74947500  | 1.10774800  |



|   |             |             |             |
|---|-------------|-------------|-------------|
| H | 2.86295300  | 7.07155500  | -2.92919600 |
| C | -4.29713700 | 1.13107300  | -1.31525600 |
| C | -4.69571400 | 0.98016700  | -2.66189100 |
| C | -5.22706100 | 1.56072700  | -0.35090400 |
| C | -6.01951000 | 1.26264700  | -3.00974600 |
| C | -6.54521900 | 1.82608700  | -0.73813500 |
| C | -6.96017800 | 1.68612800  | -2.06440600 |
| H | -6.32654100 | 1.14420000  | -4.04717700 |
| H | -7.26332800 | 2.14255400  | 0.01580900  |
| C | -0.58818200 | -4.69849400 | -1.11939400 |
| C | -0.66519200 | -4.92180100 | -2.51283800 |
| C | -0.78112500 | -5.76551800 | -0.22220100 |
| C | -0.92169500 | -6.21590700 | -2.97587000 |
| C | -1.04083000 | -7.04396600 | -0.72909800 |
| C | -1.10933000 | -7.29127800 | -2.10233200 |
| H | -0.97923200 | -6.38697400 | -4.04922900 |
| H | -1.19500200 | -7.86545900 | -0.03190200 |
| C | 5.20543300  | -1.04549400 | 0.27962500  |
| C | 5.98495000  | -1.17264600 | -0.88897000 |
| C | 5.79186600  | -1.22754900 | 1.54514100  |
| C | 7.34261000  | -1.48366400 | -0.76390500 |
| C | 7.15366800  | -1.53631000 | 1.62777800  |
| C | 7.94667300  | -1.66697400 | 0.48416800  |
| H | 7.94377800  | -1.58604000 | -1.66542500 |
| H | 7.60445400  | -1.67870700 | 2.60822400  |
| C | 2.35883600  | 4.40483600  | -3.06121300 |
| H | 3.14127900  | 3.67093800  | -2.83431500 |
| H | 1.45756400  | 3.82696800  | -3.29365500 |
| H | 2.65857200  | 4.95763900  | -3.95683500 |
| C | 0.81607000  | 5.22073700  | 1.70329900  |
| H | -0.25787800 | 5.01284800  | 1.58355800  |
| H | 1.30738900  | 4.29431000  | 2.02514000  |
| H | 0.92093700  | 5.96122100  | 2.50267300  |
| C | 2.66172200  | 9.03433900  | -1.05024900 |
| H | 2.11430900  | 9.66138700  | -0.33828700 |
| H | 3.73309500  | 9.17431400  | -0.85340200 |
| H | 2.46620800  | 9.41574500  | -2.05861600 |
| C | 5.36071400  | -0.98092000 | -2.25187100 |
| H | 4.54438700  | -1.69266900 | -2.42046400 |
| H | 4.91933400  | 0.01749600  | -2.35073500 |
| H | 6.10073600  | -1.11093600 | -3.04752900 |
| C | 4.95970500  | -1.09367300 | 2.79859900  |
| H | 4.47427500  | -0.11154200 | 2.84521800  |
| H | 4.16033400  | -1.84387100 | 2.82275000  |

|   |             |             |             |
|---|-------------|-------------|-------------|
| H | 5.56910900  | -1.21830100 | 3.69925600  |
| C | 9.42363000  | -1.96859200 | 0.59226800  |
| H | 9.77321300  | -2.56908200 | -0.25487400 |
| H | 10.01663600 | -1.04404900 | 0.60108000  |
| H | 9.65667000  | -2.51355900 | 1.51354200  |
| C | -0.50357300 | -3.78214100 | -3.49351800 |
| H | -1.38212200 | -3.12504900 | -3.47622600 |
| H | 0.35102800  | -3.14073200 | -3.25472400 |
| H | -0.38492200 | -4.15819000 | -4.51458300 |
| C | -1.35421100 | -8.68533100 | -2.63168800 |
| H | -1.88235100 | -9.30662800 | -1.90024400 |
| H | -1.94779900 | -8.66603000 | -3.55255000 |
| H | -0.40784100 | -9.19058900 | -2.86734500 |
| C | -0.71092300 | -5.55098500 | 1.27129200  |
| H | 0.30392700  | -5.28233900 | 1.58610400  |
| H | -1.37220200 | -4.73760300 | 1.59178300  |
| H | -1.00241600 | -6.45473200 | 1.81550400  |
| C | -4.82323600 | 1.75654800  | 1.09242300  |
| H | -4.14836900 | 0.95847600  | 1.41908100  |
| H | -4.31249800 | 2.72381400  | 1.22260500  |
| H | -5.68923800 | 1.75228000  | 1.75956500  |
| C | -3.71293800 | 0.50534100  | -3.70801800 |
| H | -2.77661400 | 1.07270100  | -3.67307900 |
| H | -3.43911400 | -0.54392100 | -3.54404400 |
| H | -4.13580500 | 0.59281100  | -4.71360000 |
| C | -8.37888100 | 2.00576500  | -2.47484500 |
| H | -8.45883000 | 3.03419000  | -2.85204600 |
| H | -8.72382800 | 1.34071700  | -3.27435500 |
| H | -9.07209100 | 1.91166000  | -1.63218300 |
| K | -1.44003700 | 2.09602500  | 2.13246400  |
| C | -3.79175400 | -0.50224100 | 3.79541300  |
| C | -2.90152800 | 0.03276800  | 4.73091400  |
| C | -2.00453800 | -1.69734900 | 2.72535500  |
| C | -3.35315700 | -1.39149400 | 2.80610400  |
| H | -4.05602500 | -1.78496200 | 2.08224800  |
| C | -1.05357700 | -1.13071400 | 3.61046200  |
| C | -1.54862100 | -0.28686800 | 4.63689200  |
| C | 0.39195700  | -1.27651300 | 3.33223100  |
| H | 0.41875300  | -0.57648200 | 2.18907900  |
| H | -3.27675100 | 0.68644800  | 5.51024500  |
| H | -0.86581800 | 0.12303000  | 5.37386000  |
| H | -1.66666000 | -2.32105000 | 1.90765900  |
| N | -5.18576000 | -0.07583200 | 3.81006700  |
| O | -5.48890900 | 0.87158800  | 4.54484300  |

|   |             |             |            |
|---|-------------|-------------|------------|
| O | -5.97536900 | -0.65372400 | 3.06101500 |
| C | 1.35050300  | -0.50721400 | 4.22549900 |
| H | 1.09129200  | 0.55593300  | 4.29831800 |
| H | 1.38086200  | -0.91641700 | 5.24735700 |
| H | 2.36182300  | -0.56431300 | 3.81629300 |
| C | 0.89232000  | -2.66564500 | 2.97256500 |
| H | 1.90241200  | -2.61504200 | 2.55714400 |
| H | 0.92086500  | -3.31115300 | 3.86394900 |
| H | 0.26510400  | -3.14956700 | 2.22673500 |

**[cat4]K/b4**

|    |             |             |             |
|----|-------------|-------------|-------------|
| C  | -3.31140200 | 0.91911900  | 0.03417500  |
| C  | -4.14177300 | 2.09402700  | 0.20461500  |
| C  | -3.34854700 | 3.17302200  | -0.02695200 |
| C  | -2.02738800 | 2.66283900  | -0.33292600 |
| N  | -2.03461500 | 1.29334500  | -0.28206300 |
| H  | -5.19287200 | 2.07063400  | 0.45585200  |
| H  | -3.61186600 | 4.22132000  | -0.00435000 |
| C  | 2.08766300  | 1.64856900  | -1.07954300 |
| C  | 2.56338100  | 2.99122800  | -1.32445600 |
| C  | 1.48665300  | 3.82045000  | -1.19806000 |
| C  | 0.35286900  | 2.98728600  | -0.87267400 |
| N  | 0.74260400  | 1.67198900  | -0.79512000 |
| H  | 3.58242400  | 3.24477300  | -1.58196100 |
| H  | 1.44384900  | 4.89295100  | -1.32878400 |
| C  | -1.31679700 | -2.86164600 | -0.51456500 |
| C  | -2.48930800 | -3.69665700 | -0.37518200 |
| C  | -3.52758500 | -2.87048500 | -0.07910800 |
| C  | -3.00031400 | -1.52230600 | -0.05978400 |
| N  | -1.65133800 | -1.54609100 | -0.31030000 |
| H  | -2.49282100 | -4.77127700 | -0.49274100 |
| H  | -4.56371800 | -3.12482800 | 0.09428900  |
| C  | 1.09195300  | -2.54053900 | -0.85637600 |
| C  | 2.42874400  | -3.04691100 | -1.07249000 |
| C  | 3.25514400  | -1.96651800 | -1.12415200 |
| C  | 2.42292800  | -0.79259700 | -0.96991500 |
| N  | 1.11585400  | -1.17160800 | -0.76732300 |
| H  | 2.67806700  | -4.09378400 | -1.17505200 |
| H  | 4.32424300  | -1.94386600 | -1.28263900 |
| C  | -3.79340400 | -0.38930300 | 0.13342100  |
| C  | 2.90405500  | 0.51121100  | -1.12381900 |
| C  | -0.93552800 | 3.47826300  | -0.63567400 |
| C  | -0.04140000 | -3.35586900 | -0.79112000 |
| Fe | -0.46603800 | 0.05163300  | -0.49757100 |

|    |             |             |             |
|----|-------------|-------------|-------------|
| Cl | -0.84439200 | 0.02417000  | -2.80518300 |
| O  | -0.22432700 | 0.17651500  | 1.22422800  |
| C  | -1.15816500 | 4.95655400  | -0.73355200 |
| C  | -0.87082400 | 5.79613500  | 0.35874700  |
| C  | -1.66726800 | 5.50208300  | -1.93019700 |
| C  | -1.09302000 | 7.17206300  | 0.24317200  |
| C  | -1.87291700 | 6.88296000  | -2.00808400 |
| C  | -1.59068800 | 7.73536300  | -0.93539600 |
| H  | -0.87692900 | 7.81786200  | 1.09239900  |
| H  | -2.26651900 | 7.30426100  | -2.93115600 |
| C  | -5.25936200 | -0.58457000 | 0.38017300  |
| C  | -6.16027100 | -0.51020800 | -0.70221900 |
| C  | -5.73213100 | -0.83981200 | 1.68072600  |
| C  | -7.52489100 | -0.69109800 | -0.45734800 |
| C  | -7.10533700 | -1.01298800 | 1.88396500  |
| C  | -8.01752900 | -0.94465900 | 0.82712200  |
| H  | -8.22139600 | -0.63275600 | -1.29174000 |
| H  | -7.47046900 | -1.20502700 | 2.89123900  |
| C  | 0.10773400  | -4.80597400 | -1.14398800 |
| C  | 0.05935500  | -5.16462800 | -2.50902900 |
| C  | 0.28653500  | -5.79355100 | -0.15829700 |
| C  | 0.18801100  | -6.51210800 | -2.85694100 |
| C  | 0.41404400  | -7.13131700 | -0.55017900 |
| C  | 0.36885700  | -7.51055600 | -1.89392900 |
| H  | 0.14485300  | -6.78973600 | -3.90853400 |
| H  | 0.55075900  | -7.89381800 | 0.21426000  |
| C  | 4.35386700  | 0.70241200  | -1.46124900 |
| C  | 4.77244000  | 0.54364000  | -2.80121700 |
| C  | 5.29204700  | 1.04065600  | -0.46825100 |
| C  | 6.12311800  | 0.72078000  | -3.11223800 |
| C  | 6.63724900  | 1.20294100  | -0.81964400 |
| C  | 7.07223600  | 1.04984600  | -2.13755900 |
| H  | 6.44491000  | 0.59632600  | -4.14452400 |
| H  | 7.35907400  | 1.45095700  | -0.04373600 |
| C  | -1.99674000 | 4.60521100  | -3.10121500 |
| H  | -1.15814200 | 3.94667600  | -3.35280000 |
| H  | -2.84132800 | 3.94644700  | -2.86646700 |
| H  | -2.25723700 | 5.19178800  | -3.98757200 |
| C  | -0.32090300 | 5.22300700  | 1.64700000  |
| H  | -0.90228700 | 4.35001600  | 1.96912000  |
| H  | 0.72402800  | 4.90643200  | 1.51089300  |
| H  | -0.33837400 | 5.96317800  | 2.45321200  |
| C  | -1.79544000 | 9.22749600  | -1.05869500 |
| H  | -1.95011400 | 9.69481000  | -0.08016000 |

|   |              |             |             |
|---|--------------|-------------|-------------|
| H | -0.92177000  | 9.70991400  | -1.51718700 |
| H | -2.66122100  | 9.46229800  | -1.68770000 |
| C | 3.77994300   | 0.17885200  | -3.88159300 |
| H | 3.40749600   | -0.84379600 | -3.74823100 |
| H | 2.89939700   | 0.82991900  | -3.85768900 |
| H | 4.23608700   | 0.24762700  | -4.87401500 |
| C | 4.87028500   | 1.25143600  | 0.96820800  |
| H | 4.51663800   | 2.28374700  | 1.11968400  |
| H | 4.06597400   | 0.56173300  | 1.24128400  |
| H | 5.69482800   | 1.08493300  | 1.66779700  |
| C | 8.52170800   | 1.25637800  | -2.51125200 |
| H | 8.84613800   | 0.53496500  | -3.26969900 |
| H | 8.68271100   | 2.25897200  | -2.92951800 |
| H | 9.18005600   | 1.15417900  | -1.64212200 |
| C | -0.12298200  | -4.10909000 | -3.57582500 |
| H | -1.00178100  | -3.48385200 | -3.38420100 |
| H | 0.73107900   | -3.42212500 | -3.60408700 |
| H | -0.22862200  | -4.56388400 | -4.56568300 |
| C | 0.53607200   | -8.95545300 | -2.30399000 |
| H | 0.33404300   | -9.63686000 | -1.47071700 |
| H | -0.13746300  | -9.21809400 | -3.12777200 |
| H | 1.55982200   | -9.15310900 | -2.64906900 |
| C | 0.33207700   | -5.42661900 | 1.30689200  |
| H | 1.10014000   | -4.67048800 | 1.50646400  |
| H | -0.62472100  | -5.00623000 | 1.64002900  |
| H | 0.54937800   | -6.30040700 | 1.92914200  |
| C | -4.76682500  | -0.93553100 | 2.83978800  |
| H | -4.11641500  | -1.81270200 | 2.73479600  |
| H | -4.10956400  | -0.05891400 | 2.88288000  |
| H | -5.29628300  | -1.01816400 | 3.79430600  |
| C | -5.65906600  | -0.23525500 | -2.10155100 |
| H | -5.22790200  | 0.77000300  | -2.17824300 |
| H | -4.86263600  | -0.93230800 | -2.38569400 |
| H | -6.46806300  | -0.31646000 | -2.83410600 |
| C | -9.49445700  | -1.16749000 | 1.05741000  |
| H | -10.10264900 | -0.53473500 | 0.40124700  |
| H | -9.77432000  | -2.20953100 | 0.85177500  |
| H | -9.77741600  | -0.95225100 | 2.09349600  |
| K | 1.54088800   | 1.86840500  | 2.03612200  |
| C | -0.98654600  | -1.63877100 | 3.82998500  |
| C | -0.18805600  | -0.64558200 | 4.72155500  |
| C | -0.06273400  | -1.91044900 | 2.64421600  |
| C | 1.29227000   | -1.63344600 | 3.10026300  |
| C | 2.52031700   | -1.91263400 | 2.47718500  |

|   |             |             |            |
|---|-------------|-------------|------------|
| C | 3.68850500  | -1.36480500 | 2.99685400 |
| C | 3.62052400  | -0.52435300 | 4.11708800 |
| C | 2.40641700  | -0.25918500 | 4.77894300 |
| C | 1.24979400  | -0.82741300 | 4.26947800 |
| H | 2.55755800  | -2.51237300 | 1.57404200 |
| H | 2.40584900  | 0.37901900  | 5.65604000 |
| H | 4.64941300  | -1.54490800 | 2.53095700 |
| H | -0.52185400 | 0.38572900  | 4.53625500 |
| H | -1.95427700 | -1.23558600 | 3.52118200 |
| H | -0.23377300 | -0.89534500 | 1.81969400 |
| H | -0.25302700 | -2.76893600 | 2.00662700 |
| N | 4.83229900  | 0.14600600  | 4.57344500 |
| O | 4.72112900  | 0.98363000  | 5.47642800 |
| O | 5.89891000  | -0.13342700 | 4.01660800 |
| H | -0.31910800 | -0.82793000 | 5.79382500 |
| H | -1.17960000 | -2.57037300 | 4.38074900 |

**[cat4]K/b5**

|   |             |             |             |
|---|-------------|-------------|-------------|
| C | -3.36127800 | 0.79772900  | -0.07235400 |
| C | -4.23229200 | 1.94120500  | 0.08956400  |
| C | -3.47037700 | 3.04836200  | -0.11266800 |
| C | -2.12633300 | 2.58823500  | -0.39013300 |
| N | -2.09061200 | 1.21773800  | -0.36166000 |
| H | -5.28673600 | 1.87897200  | 0.31868100  |
| H | -3.76778900 | 4.08713400  | -0.08264300 |
| C | 2.04341000  | 1.73312000  | -1.03747800 |
| C | 2.47619400  | 3.09754900  | -1.22055700 |
| C | 1.36833200  | 3.88436500  | -1.09701300 |
| C | 0.25482400  | 3.00444700  | -0.83835900 |
| N | 0.68958800  | 1.70059800  | -0.79350200 |
| H | 3.49359600  | 3.39341100  | -1.43528400 |
| H | 1.29170200  | 4.95901300  | -1.18773200 |
| C | -1.20373900 | -2.89465900 | -0.56281000 |
| C | -2.34252000 | -3.77337700 | -0.43284000 |
| C | -3.42028800 | -2.98864800 | -0.16497200 |
| C | -2.95399100 | -1.62122500 | -0.15567600 |
| N | -1.60084300 | -1.59084800 | -0.38948100 |
| H | -2.29838900 | -4.84843000 | -0.53495800 |
| H | -4.44715800 | -3.28435700 | -0.00342900 |
| C | 1.19197200  | -2.48398900 | -0.87328200 |
| C | 2.55092800  | -2.94052800 | -1.05554900 |
| C | 3.33736100  | -1.83144200 | -1.10047600 |
| C | 2.46152800  | -0.68850600 | -0.97104600 |
| N | 1.16426900  | -1.11408900 | -0.80244600 |

|    |             |             |             |
|----|-------------|-------------|-------------|
| H  | 2.84044500  | -3.97877100 | -1.13630600 |
| H  | 4.40851600  | -1.76909400 | -1.23058100 |
| C  | -3.79634100 | -0.52460300 | 0.02509100  |
| C  | 2.90169400  | 0.63047400  | -1.09566200 |
| C  | -1.05477600 | 3.44699800  | -0.63437400 |
| C  | 0.09389900  | -3.34312500 | -0.80671600 |
| Fe | -0.46552700 | 0.04206300  | -0.53845300 |
| Cl | -0.78962700 | 0.01288600  | -2.84490800 |
| O  | -0.25096100 | 0.12490400  | 1.14174900  |
| C  | -1.32251100 | 4.92003600  | -0.68998000 |
| C  | -1.11801100 | 5.72322300  | 0.44749900  |
| C  | -1.79138200 | 5.49539700  | -1.88861100 |
| C  | -1.38357600 | 7.09426300  | 0.37380200  |
| C  | -2.04288700 | 6.87040000  | -1.92323400 |
| C  | -1.84379800 | 7.68758400  | -0.80540400 |
| H  | -1.23217100 | 7.71215000  | 1.25699900  |
| H  | -2.40634200 | 7.31515000  | -2.84761500 |
| C  | -5.24811300 | -0.77967000 | 0.29449500  |
| C  | -6.17166500 | -0.75439600 | -0.76903000 |
| C  | -5.68133500 | -1.04369600 | 1.60822000  |
| C  | -7.52248200 | -0.99296300 | -0.49442100 |
| C  | -7.04038900 | -1.27446100 | 1.84071100  |
| C  | -7.97654100 | -1.25606000 | 0.80160900  |
| H  | -8.23746400 | -0.97323900 | -1.31466700 |
| H  | -7.37631000 | -1.47300400 | 2.85683800  |
| C  | 0.31031600  | -4.79776700 | -1.09918400 |
| C  | 0.37974900  | -5.20585500 | -2.44839500 |
| C  | 0.43288000  | -5.74440700 | -0.06397600 |
| C  | 0.57195600  | -6.56099400 | -2.73439400 |
| C  | 0.62683900  | -7.08985900 | -0.39499700 |
| C  | 0.70189500  | -7.51804400 | -1.72337900 |
| H  | 0.61856100  | -6.87711400 | -3.77478200 |
| H  | 0.72060500  | -7.82104000 | 0.40568800  |
| C  | 4.34824800  | 0.87602900  | -1.40708800 |
| C  | 4.79140100  | 0.74882800  | -2.74169000 |
| C  | 5.25767300  | 1.22931800  | -0.39270300 |
| C  | 6.14088600  | 0.97249600  | -3.02842100 |
| C  | 6.60171400  | 1.43913100  | -0.72073800 |
| C  | 7.06256000  | 1.31786500  | -2.03378900 |
| H  | 6.48296600  | 0.87161300  | -4.05668500 |
| H  | 7.30297800  | 1.69792500  | 0.07011100  |
| C  | -2.02761700 | 4.63573500  | -3.10888600 |
| H  | -1.14125400 | 4.04209800  | -3.35906900 |
| H  | -2.83763000 | 3.91750100  | -2.93500200 |

|   |              |             |             |
|---|--------------|-------------|-------------|
| H | -2.29264700  | 5.24598800  | -3.97762700 |
| C | -0.60944600  | 5.11710800  | 1.73752600  |
| H | -1.18075700  | 4.21988000  | 2.00605000  |
| H | 0.44751400   | 4.82933300  | 1.63523400  |
| H | -0.67825800  | 5.82778800  | 2.56700700  |
| C | -2.09565400  | 9.17559900  | -0.88046500 |
| H | -2.31961100  | 9.59624300  | 0.10574600  |
| H | -1.21622300  | 9.70565300  | -1.27007100 |
| H | -2.93399300  | 9.40693400  | -1.54671600 |
| C | 3.82849300   | 0.36622700  | -3.84267900 |
| H | 3.48712100   | -0.66960400 | -3.72851600 |
| H | 2.92738900   | 0.98906100  | -3.82639200 |
| H | 4.29798800   | 0.46197700  | -4.82651900 |
| C | 4.80287900   | 1.40112700  | 1.03856300  |
| H | 4.34218400   | 2.39158800  | 1.17949300  |
| H | 4.07089600   | 0.63427200  | 1.31122800  |
| H | 5.63520400   | 1.32062500  | 1.74294300  |
| C | 8.51068700   | 1.57698900  | -2.37868300 |
| H | 8.85650900   | 0.91405000  | -3.17959100 |
| H | 8.65487300   | 2.60844700  | -2.72728900 |
| H | 9.16300800   | 1.43085500  | -1.51123300 |
| C | 0.25363200   | -4.19763300 | -3.56828700 |
| H | -0.62163000  | -3.55173200 | -3.43887300 |
| H | 1.12205600   | -3.52840400 | -3.59811800 |
| H | 0.17683100   | -4.69614900 | -4.53949200 |
| C | 0.94485200   | -8.97143100 | -2.05863600 |
| H | 0.55407900   | -9.63494900 | -1.27948600 |
| H | 0.47370800   | -9.24790900 | -3.00824500 |
| H | 2.01880800   | -9.18024500 | -2.15572300 |
| C | 0.33967700   | -5.32826600 | 1.38591200  |
| H | 1.01950100   | -4.50091400 | 1.61437600  |
| H | -0.67188700  | -4.98503200 | 1.63562900  |
| H | 0.58417600   | -6.16005700 | 2.05358700  |
| C | -4.68717400  | -1.08695600 | 2.74612900  |
| H | -4.00164300  | -1.93631300 | 2.63327700  |
| H | -4.06583800  | -0.18402600 | 2.76814100  |
| H | -5.19211800  | -1.18404500 | 3.71241500  |
| C | -5.71020800  | -0.47100800 | -2.18024800 |
| H | -5.31931200  | 0.54931400  | -2.27293200 |
| H | -4.89471100  | -1.14096700 | -2.47592500 |
| H | -6.52991300  | -0.58815000 | -2.89571600 |
| C | -9.43555200  | -1.54389900 | 1.07049300  |
| H | -10.08252100 | -1.07606800 | 0.32065000  |
| H | -9.63607900  | -2.62351900 | 1.04658400  |



|   |             |             |            |
|---|-------------|-------------|------------|
| H | -9.74139100 | -1.17977800 | 2.05764200 |
| K | 1.39616200  | 1.81234700  | 2.17136600 |
| C | -0.99610900 | -1.22586000 | 3.91998200 |
| C | -0.16748700 | -0.53940600 | 4.76882400 |
| C | -0.22989700 | -1.82568600 | 2.82950300 |
| C | 1.16783200  | -1.59197300 | 3.16714900 |
| C | 2.35693800  | -1.91897500 | 2.50219600 |
| C | 3.56291000  | -1.38614400 | 2.94670200 |
| C | 3.56763300  | -0.50091700 | 4.04124600 |
| C | 2.40481100  | -0.17086200 | 4.74847800 |
| C | 1.19744800  | -0.72745400 | 4.31839200 |
| H | 2.34366100  | -2.54960400 | 1.62004900 |
| H | 2.46463400  | 0.50300200  | 5.59628600 |
| H | 4.49565800  | -1.60825500 | 2.44392700 |
| H | -0.46375900 | 0.05008300  | 5.62969000 |
| H | -2.07664300 | -1.26747500 | 3.99131900 |
| H | -0.33859700 | -0.87682200 | 1.85969700 |
| H | -0.56372700 | -2.71265900 | 2.29782400 |
| N | 4.81851200  | 0.15519400  | 4.40967100 |
| O | 4.77145000  | 1.06333100  | 5.24823500 |
| O | 5.85570200  | -0.20452900 | 3.84407700 |

**[cat4]K/b6**

|   |             |             |             |
|---|-------------|-------------|-------------|
| C | -2.33251600 | 1.29971500  | -1.13468400 |
| C | -2.98361800 | 2.55530300  | -1.43104100 |
| C | -2.02308200 | 3.52274600  | -1.37142500 |
| C | -0.78549300 | 2.86283400  | -1.02906400 |
| N | -0.99866700 | 1.51257800  | -0.88211900 |
| H | -4.03142700 | 2.66145100  | -1.67530900 |
| H | -2.12357400 | 4.58379200  | -1.55373800 |
| C | 3.10908300  | 1.33320500  | -0.02854900 |
| C | 3.77615800  | 2.61248100  | 0.10155300  |
| C | 2.85194700  | 3.56851700  | -0.18201700 |
| C | 1.61312500  | 2.87827000  | -0.47649000 |
| N | 1.79732700  | 1.52458500  | -0.36647700 |
| H | 4.81856500  | 2.73736300  | 0.35846000  |
| H | 2.97693200  | 4.64216000  | -0.20401400 |
| C | -0.76990600 | -2.70647700 | -0.89267300 |
| C | -2.03448900 | -3.39628600 | -1.01762700 |
| C | -3.00460600 | -2.44106400 | -1.02850600 |
| C | -2.33496200 | -1.15966900 | -0.94803400 |
| N | -0.97913400 | -1.35348100 | -0.81727400 |
| H | -2.14174600 | -4.46970700 | -1.08984400 |
| H | -4.07426500 | -2.56910600 | -1.11790900 |

|    |             |             |             |
|----|-------------|-------------|-------------|
| C  | 1.66558600  | -2.68687400 | -0.60329100 |
| C  | 2.94322400  | -3.34849600 | -0.45758000 |
| C  | 3.84773500  | -2.38982100 | -0.12226300 |
| C  | 3.13724600  | -1.12872800 | -0.10259500 |
| N  | 1.80978500  | -1.34036100 | -0.38175100 |
| H  | 3.10159100  | -4.40968400 | -0.58825600 |
| H  | 4.90544300  | -2.49968900 | 0.07183100  |
| C  | -2.99234000 | 0.06365600  | -1.11301200 |
| C  | 3.76121400  | 0.10344100  | 0.10347100  |
| C  | 0.42739600  | 3.52914600  | -0.82438000 |
| C  | 0.46847700  | -3.35494300 | -0.87073000 |
| Fe | 0.41661300  | 0.07614000  | -0.57564000 |
| Cl | 0.79576500  | 0.09429600  | -2.88497800 |
| O  | 0.16164700  | 0.15696900  | 1.14079400  |
| H  | 0.39479400  | -1.35829600 | 5.84146700  |
| C  | 5.23690400  | 0.11846900  | 0.37394500  |
| C  | 5.71949600  | 0.13183900  | 1.69562500  |
| C  | 6.13725000  | 0.14062000  | -0.71131400 |
| C  | 7.10096000  | 0.16049600  | 1.91548000  |
| C  | 7.51048700  | 0.16559300  | -0.44887300 |
| C  | 8.01293400  | 0.17237900  | 0.85653300  |
| H  | 7.47220500  | 0.17491200  | 2.93860500  |
| H  | 8.20584700  | 0.18523800  | -1.28602400 |
| C  | 0.51948200  | -4.80899700 | -1.23428600 |
| C  | 0.58510100  | -5.81947600 | -0.25566600 |
| C  | 0.50620900  | -5.14868700 | -2.60491200 |
| C  | 0.64563400  | -7.15705400 | -0.66208100 |
| C  | 0.56893800  | -6.49779600 | -2.96677900 |
| C  | 0.64351800  | -7.51680600 | -2.01237300 |
| H  | 0.69420900  | -7.93621600 | 0.09626000  |
| H  | 0.56152800  | -6.75899600 | -4.02339200 |
| C  | -4.46608300 | 0.05353900  | -1.39583900 |
| C  | -5.39658600 | 0.39489900  | -0.39550200 |
| C  | -4.91849800 | -0.27699200 | -2.69319500 |
| C  | -6.76409600 | 0.37284900  | -0.69074400 |
| C  | -6.29254100 | -0.28043000 | -2.94932200 |
| C  | -7.23293800 | 0.03202300  | -1.96135100 |
| H  | -7.47667300 | 0.62910000  | 0.09100400  |
| H  | -6.63907900 | -0.53014200 | -3.95040400 |
| C  | 0.45897800  | 5.01527100  | -1.00960800 |
| C  | 0.05426800  | 5.87630500  | 0.02738900  |
| C  | 0.90372500  | 5.54732600  | -2.23770500 |
| C  | 0.09386600  | 7.25958900  | -0.17439500 |
| C  | 0.92556600  | 6.93582900  | -2.40220900 |

|   |             |             |             |
|---|-------------|-------------|-------------|
| C | 0.52254900  | 7.80886200  | -1.38623900 |
| H | -0.21376100 | 7.92268300  | 0.63213400  |
| H | 1.26860400  | 7.34700500  | -3.34971300 |
| C | 0.57089700  | -5.48034600 | 1.21729600  |
| H | 1.36919700  | -4.77584400 | 1.47567300  |
| H | -0.37754700 | -5.01059500 | 1.50617700  |
| H | 0.69785500  | -6.37743400 | 1.83137300  |
| C | 0.40803200  | -4.07700700 | -3.66727100 |
| H | -0.58751300 | -3.61612000 | -3.67099100 |
| H | 1.11580400  | -3.25925400 | -3.49515200 |
| H | 0.59098000  | -4.49335400 | -4.66282700 |
| C | 0.74842600  | -8.96461200 | -2.43255200 |
| H | 0.17552200  | -9.15949200 | -3.34604000 |
| H | 1.79103900  | -9.24153300 | -2.63913800 |
| H | 0.38091800  | -9.63840400 | -1.65098100 |
| C | -3.93827400 | -0.61198000 | -3.79486300 |
| H | -3.12336100 | 0.11829600  | -3.84471300 |
| H | -3.46680300 | -1.58750900 | -3.62608800 |
| H | -4.43787100 | -0.64146800 | -4.76812500 |
| C | -4.94376200 | 0.82087600  | 0.98269800  |
| H | -4.05479200 | 0.26034500  | 1.28600500  |
| H | -4.70036100 | 1.89473100  | 0.99218000  |
| H | -5.71435200 | 0.65042400  | 1.74039600  |
| C | -8.71340500 | -0.02112500 | -2.25875200 |
| H | -9.28539500 | 0.61155300  | -1.57170400 |
| H | -8.92809100 | 0.30701900  | -3.28192900 |
| H | -9.09912900 | -1.04453900 | -2.15907400 |
| C | 1.36294300  | 4.63085800  | -3.34839300 |
| H | 2.29326900  | 4.11855400  | -3.07512000 |
| H | 0.63083500  | 3.84162400  | -3.55086100 |
| H | 1.53966000  | 5.18875600  | -4.27313300 |
| C | -0.42465800 | 5.31742400  | 1.34959800  |
| H | -1.40123500 | 4.82636800  | 1.22668700  |
| H | 0.28435100  | 4.57744400  | 1.74286200  |
| H | -0.54379900 | 6.10703600  | 2.09808600  |
| C | 0.52723100  | 9.30416500  | -1.60430900 |
| H | 1.36934200  | 9.61500400  | -2.23252900 |
| H | -0.39143300 | 9.63245800  | -2.10875100 |
| H | 0.59175500  | 9.84912100  | -0.65635700 |
| C | 5.62425500  | 0.14586400  | -2.13282000 |
| H | 5.02210300  | -0.74565000 | -2.34273500 |
| H | 4.97083300  | 1.00676500  | -2.31599500 |
| H | 6.44925300  | 0.18058200  | -2.85094200 |
| C | 4.76082200  | 0.10800400  | 2.86328900  |

|   |             |             |            |
|---|-------------|-------------|------------|
| H | 3.98669600  | 0.87668800  | 2.76310100 |
| H | 4.23965200  | -0.85439200 | 2.92332600 |
| H | 5.28472300  | 0.26655700  | 3.81143600 |
| C | 9.50242100  | 0.16740900  | 1.11206700 |
| H | 9.90192900  | -0.85568000 | 1.10155300 |
| H | 10.04297200 | 0.73331200  | 0.34515200 |
| H | 9.74489300  | 0.60155500  | 2.08814700 |
| C | -3.47134800 | -0.61961800 | 4.23717400 |
| C | -2.25204900 | -0.32006400 | 4.86273500 |
| C | -2.34801400 | -1.98889200 | 2.62283100 |
| C | -3.53257900 | -1.49133800 | 3.14269000 |
| H | -4.49101000 | -1.72527400 | 2.69653100 |
| C | -1.09668800 | -1.66242600 | 3.19532000 |
| C | -1.06343600 | -0.85253600 | 4.36927500 |
| C | 1.43993800  | -1.91114700 | 3.26702800 |
| C | 1.46729700  | -0.63140900 | 4.11429900 |
| C | 0.26016600  | -0.58830300 | 5.06659200 |
| C | 0.13900500  | -1.98850100 | 2.49291700 |
| H | 2.27713700  | -1.92765500 | 2.56194600 |
| H | 2.39501400  | -0.56364900 | 4.69310300 |
| H | 0.19406000  | -0.94892400 | 1.69810700 |
| H | 0.05798000  | -2.80604700 | 1.78114800 |
| H | 0.21746800  | 0.36986000  | 5.60049900 |
| H | 1.55154500  | -2.79364800 | 3.91808500 |
| H | 1.44452400  | 0.22800200  | 3.43221600 |
| H | -2.25403400 | 0.32823300  | 5.73299300 |
| H | -2.37224400 | -2.60588100 | 1.72892400 |
| N | -4.68822600 | 0.03396700  | 4.69864600 |
| O | -5.76118000 | -0.31058000 | 4.19225600 |
| O | -4.57814100 | 0.92223900  | 5.55248700 |
| K | -1.64541200 | 1.77189600  | 1.99469200 |

**[cat4]K/b7**

|   |             |             |             |
|---|-------------|-------------|-------------|
| C | -0.95249400 | -2.56001300 | -0.99013100 |
| C | -2.21779000 | -3.24352600 | -1.13874900 |
| C | -3.18482700 | -2.28573600 | -1.14265900 |
| C | -2.51437900 | -1.01017400 | -1.01621900 |
| N | -1.15872600 | -1.20749000 | -0.88359300 |
| H | -2.32748600 | -4.31470100 | -1.23416600 |
| H | -4.25375000 | -2.40829200 | -1.24676000 |
| C | -1.01004000 | 3.02013600  | -0.76142700 |
| C | -2.26981600 | 3.69588300  | -0.96595100 |
| C | -3.21493900 | 2.72588600  | -1.13778600 |
| C | -2.53537500 | 1.45552000  | -1.02645500 |

|    |             |             |             |
|----|-------------|-------------|-------------|
| N  | -1.19657200 | 1.65939000  | -0.79064300 |
| H  | -2.39316300 | 4.76966000  | -0.99816200 |
| H  | -4.27135800 | 2.84192800  | -1.33628800 |
| C  | 3.01745100  | -0.97750700 | -0.57144400 |
| C  | 3.72214600  | -2.23584700 | -0.68074000 |
| C  | 2.78166200  | -3.20303500 | -0.84199500 |
| C  | 1.49464100  | -2.54404600 | -0.82362200 |
| N  | 1.66203400  | -1.19324300 | -0.63554600 |
| H  | 4.79749400  | -2.33834800 | -0.64862000 |
| H  | 2.92241400  | -4.26676800 | -0.97246500 |
| C  | 2.99117900  | 1.47596500  | -0.40896700 |
| C  | 3.66017700  | 2.74951100  | -0.24710400 |
| C  | 2.69323800  | 3.70451500  | -0.25129300 |
| C  | 1.42959500  | 3.02003500  | -0.43416100 |
| N  | 1.64184100  | 1.66742100  | -0.51443900 |
| H  | 4.72956000  | 2.87011900  | -0.14649200 |
| H  | 2.80341900  | 4.77594900  | -0.15894900 |
| C  | 0.28294900  | -3.21328500 | -0.99982900 |
| C  | 0.20615300  | 3.67991900  | -0.55503900 |
| C  | -3.17993500 | 0.21498600  | -1.10901600 |
| C  | 3.66459300  | 0.25355200  | -0.46873200 |
| Fe | 0.25088900  | 0.22149300  | -0.65769400 |
| Cl | 0.44089300  | 0.33959600  | -2.98366900 |
| O  | 0.10342900  | 0.25659900  | 1.06492200  |
| C  | -4.65075400 | 0.20635200  | -1.40460400 |
| C  | -5.60112300 | 0.37255100  | -0.37992100 |
| C  | -5.07566800 | 0.03391300  | -2.74034500 |
| C  | -6.96360500 | 0.35606800  | -0.69834100 |
| C  | -6.44554600 | 0.03131900  | -3.01787800 |
| C  | -7.40600400 | 0.19062500  | -2.01290500 |
| H  | -7.69354100 | 0.47126500  | 0.10066000  |
| H  | -6.77249300 | -0.10124600 | -4.04749700 |
| C  | 0.31285100  | -4.67027800 | -1.35901000 |
| C  | 0.23240000  | -5.02134500 | -2.72479600 |
| C  | 0.42612100  | -5.67366600 | -0.37806800 |
| C  | 0.26501600  | -6.37376600 | -3.07768900 |
| C  | 0.45362700  | -7.01525400 | -0.77480900 |
| C  | 0.37670300  | -7.38612500 | -2.11969900 |
| H  | 0.20363200  | -6.64327200 | -4.13043800 |
| H  | 0.53711600  | -7.78827400 | -0.01328100 |
| C  | 5.16296100  | 0.27329400  | -0.51567700 |
| C  | 5.80267700  | 0.43170400  | -1.76221600 |
| C  | 5.91943300  | 0.12720700  | 0.66103500  |
| C  | 7.20023000  | 0.43757000  | -1.80539900 |

|   |             |             |             |
|---|-------------|-------------|-------------|
| C | 7.31593300  | 0.14081500  | 0.57410200  |
| C | 7.97460300  | 0.29619600  | -0.64895600 |
| H | 7.69655500  | 0.55451300  | -2.76703700 |
| H | 7.90150100  | 0.02605000  | 1.48446900  |
| C | 0.19793100  | 5.17759700  | -0.50897200 |
| C | 0.48580600  | 5.91249800  | -1.67810100 |
| C | -0.08859700 | 5.84953300  | 0.69323800  |
| C | 0.47950400  | 7.30903600  | -1.61581300 |
| C | -0.08316700 | 7.24828700  | 0.71622900  |
| C | 0.19664200  | 7.99653200  | -0.43020400 |
| H | 0.70335400  | 7.87631400  | -2.51730600 |
| H | -0.29804000 | 7.76430100  | 1.65019800  |
| C | -4.06874400 | -0.15888800 | -3.85173600 |
| H | -3.26703200 | 0.58599000  | -3.80767800 |
| H | -3.57976000 | -1.13765200 | -3.77540700 |
| H | -4.54923700 | -0.09584500 | -4.83300400 |
| C | -5.17688700 | 0.58757900  | 1.05508300  |
| H | -4.30465800 | -0.02663600 | 1.30069500  |
| H | -4.92181900 | 1.64511300  | 1.22727900  |
| H | -5.97057400 | 0.32016600  | 1.75781000  |
| C | -8.87962000 | 0.20884200  | -2.34673200 |
| H | -9.49069700 | -0.07677300 | -1.48389700 |
| H | -9.20139900 | 1.21158200  | -2.65858300 |
| H | -9.11275000 | -0.47580600 | -3.16974800 |
| C | 0.80509200  | 5.19812900  | -2.97095300 |
| H | 1.74173100  | 4.63413700  | -2.88904300 |
| H | 0.02982000  | 4.46723400  | -3.22629800 |
| H | 0.90248600  | 5.90529800  | -3.80029100 |
| C | -0.41050900 | 5.07349300  | 1.95178200  |
| H | -1.40869900 | 4.61667000  | 1.87304600  |
| H | 0.31849100  | 4.27135900  | 2.12024500  |
| H | -0.41620900 | 5.72379600  | 2.83218700  |
| C | 0.17375500  | 9.50726400  | -0.40168600 |
| H | 0.99028500  | 9.93091700  | -0.99734700 |
| H | -0.76488800 | 9.89641600  | -0.81809600 |
| H | 0.26440200  | 9.89223500  | 0.61952100  |
| C | 4.99067900  | 0.59349800  | -3.02690200 |
| H | 4.27999300  | -0.23036600 | -3.15877300 |
| H | 4.38944600  | 1.51003500  | -2.99718000 |
| H | 5.63726900  | 0.63712600  | -3.90885000 |
| C | 9.48374400  | 0.34072400  | -0.71965800 |
| H | 9.94191800  | -0.19296300 | 0.12015500  |
| H | 9.85518600  | -0.10594800 | -1.64875500 |
| H | 9.85103000  | 1.37545800  | -0.68846600 |

|   |             |             |             |
|---|-------------|-------------|-------------|
| C | 5.23039500  | -0.04321800 | 1.99210400  |
| H | 4.54488600  | 0.78678200  | 2.19563600  |
| H | 4.62122900  | -0.95340300 | 2.02168900  |
| H | 5.95142500  | -0.09661500 | 2.81315100  |
| C | 0.52328500  | -5.32028800 | 1.08785400  |
| H | 1.41271200  | -4.71094800 | 1.28698500  |
| H | -0.34465900 | -4.73977900 | 1.42165500  |
| H | 0.58367700  | -6.21871700 | 1.70999000  |
| C | 0.10282900  | -3.95815600 | -3.79217800 |
| H | -0.87802400 | -3.46949100 | -3.74797600 |
| H | 0.84337800  | -3.16104600 | -3.66643600 |
| H | 0.22145800  | -4.38892800 | -4.79127900 |
| C | 0.44338400  | -8.83814400 | -2.53298400 |
| H | -0.19244600 | -9.03676000 | -3.40303700 |
| H | 1.46742700  | -9.12383000 | -2.80875500 |
| H | 0.12628100  | -9.50252300 | -1.72195200 |
| K | -1.88545600 | 1.56042200  | 2.08368400  |
| C | 3.09957800  | -0.06138300 | 4.65115500  |
| C | 1.99105900  | -0.27319900 | 3.83254600  |
| C | 1.69073500  | -1.55416600 | 3.33645000  |
| C | 2.57127000  | -2.60573300 | 3.64071700  |
| C | 3.68600600  | -2.39444900 | 4.45269300  |
| C | 3.94687400  | -1.12461600 | 4.97298400  |
| H | 3.31450600  | 0.93755400  | 5.02196000  |
| H | 1.36186500  | 0.56269600  | 3.53937700  |
| H | 2.36467700  | -3.59899800 | 3.25062800  |
| H | 4.35046000  | -3.22352300 | 4.68165000  |
| C | 0.47570400  | -1.79973700 | 2.51337500  |
| H | 0.37812300  | -0.76559800 | 1.66595300  |
| C | -0.86295600 | -1.72684500 | 3.11005300  |
| C | -1.96981600 | -2.22319700 | 2.37429800  |
| C | -1.13904300 | -1.05489400 | 4.32891800  |
| C | -3.27484100 | -2.00584600 | 2.78437100  |
| C | -2.44488400 | -0.81792200 | 4.74483300  |
| H | -0.31471000 | -0.71542300 | 4.94724800  |
| C | -3.51002700 | -1.26935400 | 3.95411900  |
| H | -2.65615400 | -0.29389300 | 5.67015600  |
| H | 0.57915900  | -2.62642400 | 1.81290500  |
| H | 4.81374500  | -0.96067600 | 5.60710700  |
| H | -1.79327600 | -2.74714200 | 1.44226800  |
| H | -4.11221300 | -2.36696000 | 2.19961200  |
| N | -4.87477700 | -0.93528700 | 4.33371800  |
| O | -5.03533000 | -0.15364200 | 5.27841900  |
| O | -5.79680200 | -1.42670500 | 3.67512000  |

**[cat4]K/b8**

|    |             |             |             |
|----|-------------|-------------|-------------|
| C  | 3.02658000  | 0.45098000  | -0.60139700 |
| C  | 4.30161400  | -0.21888800 | -0.69982000 |
| C  | 4.04300000  | -1.53003700 | -0.97513000 |
| C  | 2.60829500  | -1.67257500 | -1.02489800 |
| N  | 2.00977700  | -0.45944300 | -0.76660800 |
| H  | 5.26005900  | 0.27102800  | -0.60198700 |
| H  | 4.74540600  | -2.33481400 | -1.14319100 |
| C  | -1.57838800 | -2.59483600 | -0.91211800 |
| C  | -1.44830400 | -4.03093600 | -1.02376300 |
| C  | -0.12728800 | -4.29409700 | -1.22265300 |
| C  | 0.56172700  | -3.02284900 | -1.18931600 |
| N  | -0.34519700 | -2.00985300 | -1.00689900 |
| H  | -2.27602600 | -4.72501400 | -0.98328300 |
| H  | 0.35631400  | -5.24970800 | -1.37059600 |
| C  | -0.46341600 | 2.94634100  | -0.92439900 |
| C  | 0.21868600  | 4.21282300  | -0.78611800 |
| C  | 1.52068400  | 3.93258600  | -0.50812400 |
| C  | 1.65348600  | 2.49188100  | -0.51360100 |
| N  | 0.42298400  | 1.91655900  | -0.73043400 |
| H  | -0.25775400 | 5.17759100  | -0.88967500 |
| H  | 2.33875800  | 4.62093200  | -0.34829600 |
| C  | -2.49052800 | 1.59525300  | -1.18573900 |
| C  | -3.92697800 | 1.45394300  | -1.25787500 |
| C  | -4.20441400 | 0.13690500  | -1.05274200 |
| C  | -2.93700000 | -0.54720000 | -0.92157200 |
| N  | -1.91493800 | 0.36555600  | -1.00056700 |
| H  | -4.61454400 | 2.27410200  | -1.41017000 |
| H  | -5.16877800 | -0.34862400 | -1.00663800 |
| C  | 2.88482800  | 1.83564200  | -0.44956800 |
| C  | -2.80524100 | -1.93324800 | -0.81069900 |
| C  | 1.95073400  | -2.88561700 | -1.25371400 |
| C  | -1.82645800 | 2.82334200  | -1.20410000 |
| Fe | 0.02361000  | -0.04079400 | -0.83663200 |
| Cl | 0.22874900  | 0.07177900  | -3.16071800 |
| O  | -0.13064400 | -0.19631900 | 0.85189700  |
| C  | 2.77232400  | -4.09064500 | -1.59533700 |
| C  | 3.28631700  | -4.93075000 | -0.59116900 |
| C  | 3.02480900  | -4.37432500 | -2.95389300 |
| C  | 4.04805200  | -6.04665800 | -0.95338900 |
| C  | 3.79285300  | -5.49724000 | -3.27570100 |
| C  | 4.31077900  | -6.34756200 | -2.29272400 |
| H  | 4.44444000  | -6.69426300 | -0.17365600 |



|   |             |             |             |
|---|-------------|-------------|-------------|
| H | 3.99193900  | -5.71452700 | -4.32336100 |
| C | 4.13873600  | 2.66263300  | -0.44406200 |
| C | 4.61984200  | 3.15477500  | -1.67915300 |
| C | 4.85528600  | 2.91428600  | 0.73946500  |
| C | 5.80546600  | 3.89395400  | -1.69665400 |
| C | 6.04105800  | 3.65647500  | 0.67742900  |
| C | 6.53071300  | 4.15890800  | -0.52958000 |
| H | 6.17816900  | 4.26636800  | -2.64897800 |
| H | 6.59408200  | 3.84335200  | 1.59606300  |
| C | -2.60004600 | 4.05134100  | -1.57865200 |
| C | -2.72992400 | 4.36052700  | -2.94937200 |
| C | -3.17860800 | 4.88564900  | -0.60383300 |
| C | -3.44005000 | 5.50697100  | -3.31763900 |
| C | -3.88134400 | 6.02347200  | -1.01632500 |
| C | -4.02548600 | 6.34995400  | -2.36751200 |
| H | -3.53619700 | 5.74900900  | -4.37440900 |
| H | -4.32573300 | 6.66987800  | -0.26192500 |
| C | -4.03437100 | -2.75758100 | -0.58463500 |
| C | -4.89325400 | -3.08903200 | -1.65132800 |
| C | -4.31413500 | -3.20309700 | 0.72339800  |
| C | -6.04568600 | -3.83441300 | -1.38102200 |
| C | -5.47981100 | -3.94167600 | 0.94970600  |
| C | -6.36014600 | -4.26394800 | -0.08765000 |
| H | -6.71313400 | -4.08848600 | -2.20242700 |
| H | -5.70354000 | -4.27497800 | 1.96147100  |
| C | 2.47155300  | -3.47722700 | -4.03681200 |
| H | 1.37570600  | -3.46071400 | -4.01813000 |
| H | 2.78816300  | -2.43734800 | -3.89906100 |
| H | 2.79390700  | -3.80966300 | -5.02825000 |
| C | 3.03075800  | -4.63108500 | 0.86964600  |
| H | 3.54046800  | -3.70268900 | 1.16722200  |
| H | 1.95585500  | -4.51651100 | 1.06307900  |
| H | 3.40527200  | -5.43143100 | 1.51499700  |
| C | 5.10869700  | -7.57259300 | -2.67469700 |
| H | 5.73409900  | -7.92104100 | -1.84595400 |
| H | 4.44683000  | -8.40183700 | -2.95791100 |
| H | 5.76128000  | -7.37332900 | -3.53205000 |
| C | -4.57282000 | -2.65789700 | -3.06491800 |
| H | -4.66756900 | -1.57266600 | -3.18844700 |
| H | -3.54007100 | -2.91019900 | -3.33115200 |
| H | -5.24184600 | -3.13952300 | -3.78480500 |
| C | -3.35421600 | -2.92176100 | 1.85761400  |
| H | -2.45027100 | -3.53724600 | 1.75382600  |
| H | -3.03059700 | -1.87717400 | 1.87104800  |

|   |             |             |             |
|---|-------------|-------------|-------------|
| H | -3.80880800 | -3.14400300 | 2.82666400  |
| C | -7.59885300 | -5.08957800 | 0.17360100  |
| H | -8.41327700 | -4.81854700 | -0.50730300 |
| H | -7.39872500 | -6.15999700 | 0.03002500  |
| H | -7.95795200 | -4.96097500 | 1.20048900  |
| C | -2.11184700 | 3.46659600  | -4.00021300 |
| H | -1.04151000 | 3.31291100  | -3.82317500 |
| H | -2.56203200 | 2.46699100  | -3.98902600 |
| H | -2.24063200 | 3.88833000  | -5.00184800 |
| C | -4.81554500 | 7.56547600  | -2.79419100 |
| H | -4.84673700 | 8.32292600  | -2.00362700 |
| H | -4.38726400 | 8.02776000  | -3.69061400 |
| H | -5.85393800 | 7.29833900  | -3.03239600 |
| C | -3.04008800 | 4.57231800  | 0.86788100  |
| H | -3.40784300 | 3.56704700  | 1.10121500  |
| H | -1.99106700 | 4.60919300  | 1.18601900  |
| H | -3.60025600 | 5.28562900  | 1.48008500  |
| C | 4.35482100  | 2.42393900  | 2.07758500  |
| H | 3.58857900  | 3.09910700  | 2.47901000  |
| H | 3.89778300  | 1.43286300  | 2.00042600  |
| H | 5.16444900  | 2.37199000  | 2.81286700  |
| C | 3.86957300  | 2.88700500  | -2.96438800 |
| H | 3.65763900  | 1.82026500  | -3.09635200 |
| H | 2.89719200  | 3.39354700  | -2.96877500 |
| H | 4.43878100  | 3.23631200  | -3.83121400 |
| C | 7.79635600  | 4.98299800  | -0.57646900 |
| H | 8.37958800  | 4.77070400  | -1.47957900 |
| H | 7.56776200  | 6.05713100  | -0.58441000 |
| H | 8.43412300  | 4.79086700  | 0.29285200  |
| K | 1.69298600  | -1.44000600 | 2.13713800  |
| H | -0.80206300 | 0.63733400  | 1.44971000  |
| C | 1.43789500  | 0.41602600  | 5.29801300  |
| C | 1.90859400  | 1.33087800  | 4.33587300  |
| C | 1.03916400  | 1.80288600  | 3.35570200  |
| C | -0.29435000 | 1.36552400  | 3.34808800  |
| C | -0.76490800 | 0.46888300  | 4.36294500  |
| C | 0.10319100  | -0.01206700 | 5.33800700  |
| H | 1.39362800  | 2.47423600  | 2.57933300  |
| H | -0.21296300 | -0.70647000 | 6.10820700  |
| C | -1.32797200 | 1.51950100  | 2.33428500  |
| C | -2.52311000 | 0.86757000  | 2.89062800  |
| C | -3.83291400 | 0.78946900  | 2.40732800  |
| C | -4.77680800 | 0.05442300  | 3.12616800  |
| C | -4.42718600 | -0.61329300 | 4.31111000  |

|   |             |             |            |
|---|-------------|-------------|------------|
| C | -3.12051800 | -0.55506800 | 4.79774300 |
| C | -2.17259600 | 0.19034300  | 4.09239400 |
| H | -4.10744600 | 1.27688400  | 1.47805100 |
| H | -5.17992600 | -1.18078600 | 4.85136700 |
| H | -2.85060400 | -1.06737000 | 5.71833800 |
| H | -5.79662400 | -0.01142400 | 2.75658500 |
| H | 2.94553600  | 1.64021700  | 4.37122000 |
| N | 2.38475500  | -0.13618400 | 6.26290600 |
| O | 1.94552300  | -0.86663100 | 7.15568400 |
| O | 3.58252000  | 0.13603500  | 6.11767100 |
| H | -1.39144500 | 2.40975600  | 1.71502600 |

**[cat4]K/b10**

|   |             |             |             |
|---|-------------|-------------|-------------|
| C | 2.83563900  | -1.72984600 | -0.33491300 |
| C | 3.19023100  | -3.11371200 | -0.55887200 |
| C | 2.11594200  | -3.71164400 | -1.14279200 |
| C | 1.07843500  | -2.71197000 | -1.23738000 |
| N | 1.54419200  | -1.51920600 | -0.75083600 |
| H | 4.14941100  | -3.54621500 | -0.31102900 |
| H | 2.00212300  | -4.73942800 | -1.45679900 |
| C | -2.35757800 | -0.13863800 | -1.31766700 |
| C | -3.33252300 | -1.17595900 | -1.57929600 |
| C | -2.64178800 | -2.32575300 | -1.80686300 |
| C | -1.24449100 | -2.02630700 | -1.59779700 |
| N | -1.10090800 | -0.69885100 | -1.28594400 |
| H | -4.40040000 | -1.01865000 | -1.60957200 |
| H | -3.02435900 | -3.30247700 | -2.06737900 |
| C | 2.53596000  | 2.53056200  | -0.41771900 |
| C | 3.87380900  | 2.81457800  | 0.04764400  |
| C | 4.42544700  | 1.62374100  | 0.41519900  |
| C | 3.44215400  | 0.60190900  | 0.13775900  |
| N | 2.28930200  | 1.18324200  | -0.32382200 |
| H | 4.31740300  | 3.80049300  | 0.07270700  |
| H | 5.41849900  | 1.43044700  | 0.79577600  |
| C | 0.29821100  | 3.23186700  | -1.14868700 |
| C | -0.67760300 | 4.22981900  | -1.50938600 |
| C | -1.88854700 | 3.60206400  | -1.55475600 |
| C | -1.65552700 | 2.21101400  | -1.25938200 |
| N | -0.32303900 | 2.00885600  | -1.00229400 |
| H | -0.44950200 | 5.26965000  | -1.69858900 |
| H | -2.85663500 | 4.01953200  | -1.79480600 |
| C | 3.71699000  | -0.76935700 | 0.16711300  |
| C | -2.65338000 | 1.22906600  | -1.28746200 |
| C | -0.22039600 | -2.97206700 | -1.67794600 |

|    |             |             |             |
|----|-------------|-------------|-------------|
| C  | 1.64323200  | 3.50385200  | -0.88014000 |
| Fe | 0.57863800  | 0.21099600  | -0.76987100 |
| Cl | 1.17182600  | 0.38695400  | -3.03764600 |
| O  | 0.19773900  | 0.13106600  | 0.89832400  |
| H  | -0.41112100 | -0.66764500 | 1.55734600  |
| C  | -0.25756500 | 1.73508700  | 5.53174200  |
| C  | 0.83572800  | 0.91389000  | 5.19192000  |
| C  | 0.68554200  | -0.15020500 | 4.29708300  |
| C  | -0.57114900 | -0.39321700 | 3.72946500  |
| C  | -1.68108900 | 0.42221400  | 4.09194300  |
| C  | -1.52411700 | 1.48732400  | 4.98857700  |
| H  | -0.12217600 | 2.54854000  | 6.23975300  |
| H  | 1.80803000  | 1.10562700  | 5.63881700  |
| H  | 1.53060500  | -0.77973300 | 4.03628600  |
| H  | -2.37541500 | 2.10327600  | 5.27085300  |
| C  | -0.97344400 | -1.35456800 | 2.67397200  |
| C  | -2.41700500 | -1.14336900 | 2.52729600  |
| C  | -3.34213600 | -1.77460500 | 1.68336800  |
| C  | -4.64853400 | -1.30662300 | 1.62535900  |
| C  | -5.03563200 | -0.22039900 | 2.42820600  |
| C  | -4.15315400 | 0.39846400  | 3.31597900  |
| C  | -2.84098500 | -0.05571200 | 3.34882200  |
| H  | -3.02854600 | -2.59379300 | 1.04684300  |
| H  | -5.37412300 | -1.74429700 | 0.95153200  |
| H  | -4.49564600 | 1.22946700  | 3.92042400  |
| C  | -0.51938800 | -4.30721500 | -2.28825400 |
| C  | -0.26192400 | -4.48296700 | -3.66470700 |
| C  | -1.03986100 | -5.36313400 | -1.51856400 |
| C  | -0.53587700 | -5.72382300 | -4.24630900 |
| C  | -1.29923800 | -6.58963200 | -2.14156400 |
| C  | -1.05768900 | -6.78859700 | -3.50317400 |
| H  | -0.33471900 | -5.86348700 | -5.30685700 |
| H  | -1.69700900 | -7.40861900 | -1.54519200 |
| C  | -4.08652700 | 1.65823200  | -1.33120300 |
| C  | -4.66733200 | 2.22486600  | -0.17188200 |
| C  | -4.87782300 | 1.45795300  | -2.48052000 |
| C  | -6.04231700 | 2.45406600  | -0.13886000 |
| C  | -6.25516100 | 1.70705000  | -2.40607900 |
| C  | -6.86200100 | 2.16064000  | -1.23429900 |
| H  | -6.49464900 | 2.82517500  | 0.77743100  |
| H  | -6.86789900 | 1.52694300  | -3.28744400 |
| C  | 2.16134600  | 4.88662000  | -1.13013200 |
| C  | 1.99668700  | 5.91686900  | -0.18562900 |
| C  | 2.82742600  | 5.14308600  | -2.34775900 |

|   |             |             |             |
|---|-------------|-------------|-------------|
| C | 2.48804900  | 7.19492000  | -0.47151100 |
| C | 3.30144800  | 6.43452500  | -2.59709000 |
| C | 3.13882800  | 7.47484600  | -1.67629200 |
| H | 2.36143000  | 7.98865000  | 0.26228700  |
| H | 3.81270500  | 6.63336800  | -3.53708400 |
| C | 5.08024800  | -1.20679900 | 0.61381000  |
| C | 5.34292700  | -1.43331100 | 1.97820900  |
| C | 6.10617200  | -1.36371300 | -0.34274600 |
| C | 6.62779200  | -1.83144300 | 2.36503800  |
| C | 7.37404900  | -1.76695800 | 0.08592200  |
| C | 7.65418700  | -2.01168100 | 1.43450900  |
| H | 6.83082000  | -2.00235200 | 3.42062600  |
| H | 8.16568600  | -1.88544200 | -0.65151900 |
| C | -1.32490700 | -5.17466100 | -0.04888000 |
| H | -0.50526100 | -4.66324200 | 0.46108700  |
| H | -2.22168500 | -4.56072200 | 0.10356400  |
| H | -1.49164000 | -6.13227800 | 0.45285500  |
| C | 0.31035700  | -3.35317200 | -4.49010800 |
| H | -0.30392400 | -2.44840400 | -4.42039700 |
| H | 1.30638300  | -3.06330800 | -4.13548800 |
| H | 0.39087400  | -3.63639500 | -5.54420600 |
| C | -1.37288000 | -8.10959400 | -4.16629200 |
| H | -1.40713200 | -8.92743400 | -3.43851200 |
| H | -2.34909900 | -8.07672800 | -4.66851200 |
| H | -0.62700400 | -8.36384500 | -4.92791200 |
| C | 4.26068600  | -1.25901400 | 3.02025800  |
| H | 3.69676300  | -0.33320000 | 2.86322300  |
| H | 3.53657400  | -2.08142600 | 2.98459100  |
| H | 4.68538700  | -1.23640400 | 4.02912700  |
| C | 5.84372400  | -1.09044200 | -1.80630000 |
| H | 5.09614500  | -1.78020200 | -2.21464300 |
| H | 5.44590600  | -0.08032200 | -1.95717800 |
| H | 6.75967600  | -1.19122000 | -2.39650400 |
| C | 9.02563600  | -2.47620500 | 1.86676200  |
| H | 9.81452600  | -2.01480600 | 1.26218400  |
| H | 9.21909600  | -2.23648000 | 2.91782200  |
| H | 9.12733400  | -3.56410400 | 1.75539600  |
| C | 1.30616500  | 5.65407700  | 1.13453200  |
| H | 0.25488500  | 5.37517500  | 0.97767400  |
| H | 1.80758000  | 4.84134700  | 1.67916500  |
| H | 1.32068300  | 6.53953700  | 1.77727900  |
| C | 3.63388900  | 8.86745000  | -1.99037800 |
| H | 2.93076200  | 9.39695000  | -2.64694500 |
| H | 3.75069500  | 9.46848400  | -1.08235700 |

|   |             |             |             |
|---|-------------|-------------|-------------|
| H | 4.60002300  | 8.84183600  | -2.50681900 |
| C | 3.04359300  | 4.03577500  | -3.35386400 |
| H | 3.79568900  | 3.32320100  | -2.99295400 |
| H | 2.13403500  | 3.45037600  | -3.52472300 |
| H | 3.38920600  | 4.43629900  | -4.31187300 |
| C | -3.82718100 | 2.60524300  | 1.02741000  |
| H | -3.10835500 | 1.81767700  | 1.27183700  |
| H | -3.26657300 | 3.52902100  | 0.82767500  |
| H | -4.45957300 | 2.77229300  | 1.90282800  |
| C | -4.27681000 | 0.99184600  | -3.79030600 |
| H | -3.23923200 | 1.32225600  | -3.89840300 |
| H | -4.27096000 | -0.10121900 | -3.87509200 |
| H | -4.85305600 | 1.38389500  | -4.63506200 |
| C | -8.35823000 | 2.31894800  | -1.11700300 |
| H | -8.63309100 | 3.33597000  | -0.81119600 |
| H | -8.86607900 | 2.09912400  | -2.06163200 |
| H | -8.74473100 | 1.63473000  | -0.35124900 |
| C | -0.36505700 | -2.72031600 | 2.68145500  |
| C | 0.95612100  | -2.91263000 | 2.25363200  |
| C | -1.06614700 | -3.82129000 | 3.20225400  |
| C | 1.56967100  | -4.16171300 | 2.36336100  |
| H | 1.49094300  | -2.07680500 | 1.81887400  |
| C | -0.45522500 | -5.07078300 | 3.30900800  |
| H | -2.09043300 | -3.68739100 | 3.53846200  |
| C | 0.86819700  | -5.24524500 | 2.89576900  |
| H | 2.58918600  | -4.28707500 | 2.01118900  |
| H | -1.01332100 | -5.90865700 | 3.71918000  |
| K | -0.06984900 | 2.45347900  | 2.00630400  |
| H | 1.34327300  | -6.21919200 | 2.97666100  |
| N | -6.37666700 | 0.33017300  | 2.27951900  |
| O | -7.16230400 | -0.23580100 | 1.51579700  |
| O | -6.65111900 | 1.36209800  | 2.90729700  |

**[cat4]K/b11**

|   |             |             |             |
|---|-------------|-------------|-------------|
| C | 2.46943900  | 0.31492700  | -1.32498300 |
| C | 3.57008000  | -0.51802000 | -1.76654000 |
| C | 3.03492500  | -1.69850400 | -2.18785100 |
| C | 1.61486000  | -1.63376100 | -1.91942600 |
| N | 1.30236400  | -0.39836300 | -1.41902200 |
| H | 4.60820900  | -0.22157200 | -1.76134100 |
| H | 3.54314800  | -2.56027900 | -2.59794700 |
| C | -2.34494700 | -2.04571000 | -0.36867800 |
| C | -2.45592200 | -3.47975100 | -0.54547100 |
| C | -1.36906600 | -3.87841300 | -1.26469800 |

|    |             |             |             |
|----|-------------|-------------|-------------|
| C  | -0.54304600 | -2.70656500 | -1.46098900 |
| N  | -1.16289600 | -1.61580200 | -0.91496300 |
| H  | -3.27759300 | -4.08208400 | -0.18437200 |
| H  | -1.11620500 | -4.87139900 | -1.60962900 |
| C  | -0.59862900 | 3.28117200  | -0.95851200 |
| C  | 0.27371800  | 4.43344600  | -1.00005600 |
| C  | 1.55252700  | 3.96277400  | -0.91930700 |
| C  | 1.46871200  | 2.51968200  | -0.89460300 |
| N  | 0.15805000  | 2.13589100  | -0.89843500 |
| H  | -0.06439600 | 5.45826700  | -1.07107700 |
| H  | 2.47816900  | 4.52206700  | -0.92290300 |
| C  | -2.77126000 | 2.21907200  | -0.52499500 |
| C  | -4.15672800 | 2.27107500  | -0.11877100 |
| C  | -4.50350800 | 1.00680800  | 0.26629500  |
| C  | -3.34914500 | 0.16675300  | 0.04084700  |
| N  | -2.30839800 | 0.93066000  | -0.41127700 |
| H  | -4.76607000 | 3.16465400  | -0.12800800 |
| H  | -5.46026900 | 0.65164700  | 0.62419800  |
| C  | 2.57971100  | 1.66694500  | -0.96613400 |
| C  | -3.35151800 | -1.22994000 | 0.16247500  |
| C  | 0.74189400  | -2.72344500 | -2.01659800 |
| C  | -1.99389300 | 3.33969500  | -0.84980900 |
| Fe | -0.48305000 | 0.23766300  | -0.86818500 |
| Cl | -1.06313600 | 0.48433600  | -3.13843700 |
| O  | -0.08600600 | 0.11461400  | 0.81198200  |
| H  | 0.43807600  | -0.95554100 | 1.21805900  |
| C  | 4.65751700  | -0.22454600 | 3.06795100  |
| C  | 3.55314700  | -0.23643200 | 3.92370800  |
| C  | 3.44138600  | -1.45464100 | 1.41755400  |
| C  | 4.62000200  | -0.84445100 | 1.81757900  |
| H  | 3.62653500  | 0.25797500  | 4.88614000  |
| H  | 5.48981400  | -0.80771800 | 1.17397000  |
| C  | 1.01650500  | -1.98970800 | 1.76162100  |
| C  | 2.29744500  | -1.44586000 | 2.23569600  |
| C  | 2.37084200  | -0.84068700 | 3.51241200  |
| C  | 1.12758500  | -0.79336200 | 4.37717900  |
| H  | 1.09878200  | -2.64099100 | 0.89203600  |
| H  | 1.40174500  | -0.76959900 | 5.43874200  |
| H  | 0.61721900  | 0.17240600  | 4.19360200  |
| H  | 3.38441100  | -1.91285900 | 0.43806400  |
| C  | 0.10019000  | -2.48386200 | 2.81051900  |
| C  | -0.82905200 | -3.50460300 | 2.54961700  |
| C  | -1.68218700 | -3.96696500 | 3.54844700  |
| C  | -1.61293800 | -3.42161400 | 4.83376200  |

|   |             |             |             |
|---|-------------|-------------|-------------|
| C | -0.69454300 | -2.40441000 | 5.10317300  |
| C | 0.15500100  | -1.92331200 | 4.10399200  |
| H | -0.88117500 | -3.92608100 | 1.55090300  |
| H | -2.40049200 | -4.75082800 | 3.32506500  |
| H | -2.26763100 | -3.78569400 | 5.62084100  |
| H | -0.63258400 | -1.98234100 | 6.10471800  |
| C | 1.20814900  | -3.95775800 | -2.72566900 |
| C | 1.03429500  | -4.02189300 | -4.12432300 |
| C | 1.80802700  | -5.02736000 | -2.03381700 |
| C | 1.46226200  | -5.16587300 | -4.80488900 |
| C | 2.22223600  | -6.15329400 | -2.75406000 |
| C | 2.05458000  | -6.24330800 | -4.13880700 |
| H | 1.33002600  | -5.21534300 | -5.88408700 |
| H | 2.68921400  | -6.97843600 | -2.21955300 |
| C | 3.92080400  | 2.21644100  | -0.59491900 |
| C | 4.15661400  | 2.46901300  | 0.78048500  |
| C | 4.94754000  | 2.43534200  | -1.53055500 |
| C | 5.43431200  | 2.83537300  | 1.19720500  |
| C | 6.22056600  | 2.80247600  | -1.06709800 |
| C | 6.49240600  | 2.97496700  | 0.28948500  |
| H | 5.62360000  | 2.98850000  | 2.25762000  |
| H | 7.01871200  | 2.94932200  | -1.79279000 |
| C | -4.51099700 | -1.86688100 | 0.86137600  |
| C | -4.54641300 | -1.82899600 | 2.27093800  |
| C | -5.56147100 | -2.47196900 | 0.14207300  |
| C | -5.59990200 | -2.45716100 | 2.94172400  |
| C | -6.60089500 | -3.08260700 | 0.85238900  |
| C | -6.63011500 | -3.10195000 | 2.25038100  |
| H | -5.61905800 | -2.43787900 | 4.02997400  |
| H | -7.41329600 | -3.54883600 | 0.29806200  |
| C | -2.67924900 | 4.65496900  | -1.05272800 |
| C | -3.14501400 | 4.97371300  | -2.34623200 |
| C | -2.85722100 | 5.56496000  | 0.00499100  |
| C | -3.77580700 | 6.20463300  | -2.54967100 |
| C | -3.49405500 | 6.78649400  | -0.23869800 |
| C | -3.96164400 | 7.12396600  | -1.51161200 |
| H | -4.13010400 | 6.45372000  | -3.54812800 |
| H | -3.62576400 | 7.48955800  | 0.58168000  |
| C | 0.40896000  | -2.86704400 | -4.87261500 |
| H | -0.56062600 | -2.58411200 | -4.44862500 |
| H | 1.03115300  | -1.96674100 | -4.80785900 |
| H | 0.26943900  | -3.11171500 | -5.93023800 |
| C | 2.01446700  | -4.96693300 | -0.53778900 |
| H | 2.63517800  | -4.10870500 | -0.25530000 |



|   |             |             |             |
|---|-------------|-------------|-------------|
| H | 1.06228400  | -4.85943100 | -0.00517200 |
| H | 2.50594100  | -5.87196000 | -0.16775700 |
| C | 2.47609400  | -7.48280800 | -4.89368600 |
| H | 1.63954600  | -8.18737700 | -4.99484000 |
| H | 2.81788600  | -7.23916900 | -5.90574700 |
| H | 3.28648600  | -8.01117700 | -4.37968300 |
| C | 3.04389900  | 2.35423900  | 1.80188500  |
| H | 2.33839400  | 3.19026600  | 1.68943800  |
| H | 2.47911300  | 1.42429000  | 1.67677500  |
| H | 3.44840000  | 2.38409200  | 2.81704200  |
| C | 4.71588500  | 2.30010600  | -3.02126900 |
| H | 5.14067200  | 1.37027300  | -3.41948600 |
| H | 3.65121900  | 2.30144200  | -3.26936400 |
| H | 5.19511300  | 3.12734800  | -3.55721900 |
| C | 7.87725800  | 3.29604200  | 0.79721000  |
| H | 7.90923100  | 4.28344600  | 1.27546800  |
| H | 8.18052600  | 2.56033000  | 1.55183800  |
| H | 8.61710100  | 3.28961100  | -0.00980100 |
| C | -2.36933900 | 5.23369900  | 1.39850900  |
| H | -2.88036400 | 4.33861900  | 1.78266200  |
| H | -1.28628800 | 5.04835800  | 1.39924300  |
| H | -2.56794600 | 6.05180400  | 2.09772300  |
| C | -2.96674200 | 3.99583800  | -3.48405400 |
| H | -1.92029400 | 3.69433700  | -3.60114200 |
| H | -3.51943900 | 3.06747100  | -3.29948400 |
| H | -3.31600800 | 4.42244700  | -4.42940300 |
| C | -4.67130100 | 8.43468400  | -1.76055200 |
| H | -5.76036400 | 8.29596500  | -1.78615600 |
| H | -4.45214300 | 9.16734900  | -0.97659800 |
| H | -4.37934500 | 8.87019500  | -2.72280500 |
| C | -5.58861300 | -2.43666500 | -1.36991800 |
| H | -5.36727700 | -1.43132200 | -1.74511800 |
| H | -4.83576400 | -3.10199000 | -1.80744200 |
| H | -6.56856000 | -2.73995400 | -1.75155300 |
| C | -3.49269500 | -1.07489100 | 3.05328900  |
| H | -2.48646000 | -1.27016600 | 2.67116300  |
| H | -3.67725300 | 0.00775800  | 2.97992000  |
| H | -3.50936900 | -1.35174800 | 4.11032900  |
| C | -7.73933500 | -3.81051900 | 2.99278500  |
| H | -8.67669800 | -3.79339900 | 2.42597800  |
| H | -7.48627000 | -4.86469300 | 3.16951300  |
| H | -7.92568100 | -3.35308800 | 3.97073200  |
| N | 5.84392100  | 0.53033200  | 3.44883700  |
| O | 6.87127700  | 0.37726800  | 2.78434000  |

|   |             |            |            |
|---|-------------|------------|------------|
| O | 5.74526300  | 1.31695000 | 4.39913900 |
| K | -0.91302100 | 2.00479300 | 2.21382500 |

**[cat4]K/b12**

|    |             |             |             |
|----|-------------|-------------|-------------|
| C  | -0.73487000 | -2.88450600 | -0.78372600 |
| C  | -1.64637600 | -3.94916300 | -0.42902800 |
| C  | -2.77272100 | -3.35852800 | 0.05743000  |
| C  | -2.57379000 | -1.92751000 | -0.03866000 |
| N  | -1.30476700 | -1.66895000 | -0.50123600 |
| H  | -1.43578600 | -5.00268400 | -0.54943100 |
| H  | -3.67954000 | -3.83024500 | 0.40955200  |
| C  | -2.58562500 | 2.35094600  | -0.55562100 |
| C  | -3.99050200 | 2.55701100  | -0.29857700 |
| C  | -4.51738000 | 1.33992800  | 0.02220300  |
| C  | -3.43542500 | 0.38428900  | -0.04366000 |
| N  | -2.26582500 | 1.02600600  | -0.37448000 |
| H  | -4.49617800 | 3.50934800  | -0.37868100 |
| H  | -5.54416800 | 1.09131200  | 0.25184300  |
| C  | 2.44714100  | -0.09776100 | -1.45110100 |
| C  | 3.45758700  | -1.07289400 | -1.80387600 |
| C  | 2.83060000  | -2.27680200 | -1.91128000 |
| C  | 1.44953200  | -2.06177800 | -1.54229100 |
| N  | 1.24014700  | -0.72996700 | -1.29176700 |
| H  | 4.50419800  | -0.84984600 | -1.94932900 |
| H  | 3.25428100  | -3.23791500 | -2.16774900 |
| C  | 1.64310200  | 2.21934700  | -1.28702900 |
| C  | 1.84804000  | 3.64692700  | -1.41876700 |
| C  | 0.62220400  | 4.22970100  | -1.33950500 |
| C  | -0.33432800 | 3.16206600  | -1.12913700 |
| N  | 0.31247700  | 1.95435600  | -1.12364300 |
| H  | 2.81131300  | 4.11408000  | -1.56980800 |
| H  | 0.36725100  | 5.27815300  | -1.40631800 |
| C  | 0.52851600  | -3.09342500 | -1.34571900 |
| C  | -1.69524700 | 3.37303600  | -0.90041800 |
| C  | -3.59262000 | -0.99152800 | 0.17185100  |
| C  | 2.67724700  | 1.28157600  | -1.35797200 |
| Fe | -0.47583300 | 0.14127100  | -0.78251100 |
| Cl | -1.16937300 | 0.06588900  | -3.02129200 |
| O  | 0.02680700  | 0.28237100  | 0.86392300  |
| C  | -4.97366300 | -1.49215600 | 0.47740900  |
| C  | -5.51433300 | -1.39001800 | 1.77243700  |
| C  | -5.75152300 | -2.04316700 | -0.56712300 |
| C  | -6.80662100 | -1.86716500 | 2.01996300  |
| C  | -7.03885300 | -2.50456900 | -0.27939600 |

|   |             |             |             |
|---|-------------|-------------|-------------|
| C | -7.58441200 | -2.43157900 | 1.00717200  |
| H | -7.21404200 | -1.79379000 | 3.02666000  |
| H | -7.63585400 | -2.92944700 | -1.08430100 |
| C | 0.88731800  | -4.47251000 | -1.81187200 |
| C | 0.64890800  | -4.79438500 | -3.16550500 |
| C | 1.43332000  | -5.43349100 | -0.94036100 |
| C | 0.96504600  | -6.07845200 | -3.61917800 |
| C | 1.73455100  | -6.70720000 | -1.43564200 |
| C | 1.51094400  | -7.04825700 | -2.77228100 |
| H | 0.77699500  | -6.32828200 | -4.66169800 |
| H | 2.15394500  | -7.44980100 | -0.75947400 |
| C | 4.09164000  | 1.76173500  | -1.24564400 |
| C | 4.97761700  | 1.76006300  | -2.33893900 |
| C | 4.54403000  | 2.17242700  | 0.03199100  |
| C | 6.32810200  | 2.06484100  | -2.11532500 |
| C | 5.89653100  | 2.46459400  | 0.20996400  |
| C | 6.81216100  | 2.38617300  | -0.84592500 |
| H | 7.01685500  | 2.04455300  | -2.95799600 |
| H | 6.25157000  | 2.74654800  | 1.19915300  |
| C | -2.22879800 | 4.76760500  | -1.01484500 |
| C | -2.57087300 | 5.27597900  | -2.28460000 |
| C | -2.38447500 | 5.56742100  | 0.13257400  |
| C | -3.07141700 | 6.57841300  | -2.37629400 |
| C | -2.88564800 | 6.86624500  | -0.00047200 |
| C | -3.23898000 | 7.38851100  | -1.24807700 |
| H | -3.33569500 | 6.97190700  | -3.35599400 |
| H | -2.99896000 | 7.48514900  | 0.88775900  |
| C | -5.21144900 | -2.13276100 | -1.97697700 |
| H | -4.70350800 | -1.20978100 | -2.27581600 |
| H | -4.46894700 | -2.93436000 | -2.06808300 |
| H | -6.01580700 | -2.33491600 | -2.69105800 |
| C | -4.73013900 | -0.74361700 | 2.89174700  |
| H | -3.68908300 | -1.08098900 | 2.89280800  |
| H | -4.73736300 | 0.35154800  | 2.78472000  |
| H | -5.16018900 | -0.97888200 | 3.87084700  |
| C | -8.98534300 | -2.92937700 | 1.27732200  |
| H | -9.20094900 | -2.96501100 | 2.35024400  |
| H | -9.73434800 | -2.27704800 | 0.80978100  |
| H | -9.13711400 | -3.93556100 | 0.86885000  |
| C | -2.38598300 | 4.42915400  | -3.52263300 |
| H | -1.32346300 | 4.23595100  | -3.71245800 |
| H | -2.85732000 | 3.44612900  | -3.41382500 |
| H | -2.80625800 | 4.92160900  | -4.40495600 |
| C | -2.01886000 | 5.03055400  | 1.49957600  |

|   |             |             |             |
|---|-------------|-------------|-------------|
| H | -2.73233300 | 4.25273100  | 1.80975300  |
| H | -1.01497200 | 4.58743500  | 1.49245700  |
| H | -2.03866200 | 5.82042900  | 2.25714000  |
| C | -3.80975100 | 8.78195400  | -1.37589000 |
| H | -3.46853200 | 9.27135600  | -2.29486900 |
| H | -4.90721800 | 8.75794700  | -1.41046400 |
| H | -3.52302200 | 9.41403400  | -0.52856100 |
| C | 4.49788000  | 1.44758800  | -3.74085800 |
| H | 4.46880700  | 0.36950700  | -3.93944400 |
| H | 3.48334800  | 1.82370700  | -3.90764300 |
| H | 5.16025600  | 1.90093500  | -4.48568900 |
| C | 8.27632000  | 2.65619500  | -0.59347800 |
| H | 8.63666400  | 2.05007300  | 0.24635500  |
| H | 8.88824800  | 2.42659700  | -1.47196900 |
| H | 8.44911300  | 3.70790100  | -0.33050600 |
| C | 3.58647900  | 2.32339500  | 1.19329400  |
| H | 2.93266500  | 3.19155500  | 1.04472600  |
| H | 2.93053300  | 1.45398200  | 1.30035200  |
| H | 4.13168200  | 2.46927900  | 2.12914000  |
| C | 1.69409400  | -5.10711400 | 0.51211200  |
| H | 2.40945300  | -4.28248400 | 0.61306900  |
| H | 0.77545800  | -4.79811400 | 1.02456600  |
| H | 2.10282300  | -5.97039400 | 1.04620100  |
| C | 0.06631500  | -3.76694500 | -4.10903700 |
| H | -0.85855400 | -3.33039600 | -3.71636600 |
| H | 0.75279100  | -2.92443100 | -4.25313300 |
| H | -0.14481500 | -4.20709900 | -5.08857700 |
| C | 1.87356800  | -8.41801700 | -3.29747600 |
| H | 1.16857200  | -8.75165900 | -4.06714400 |
| H | 2.87277700  | -8.41465000 | -3.75346200 |
| H | 1.88265400  | -9.16653700 | -2.49782000 |
| K | -1.63605100 | 1.26899900  | 2.52267200  |
| C | -1.81620900 | -2.25147100 | 4.33956600  |
| C | -0.94107500 | -2.37662800 | 3.25846900  |
| C | -0.28241900 | -0.70930400 | 5.40930200  |
| C | -1.49548300 | -1.40646000 | 5.40948800  |
| H | -2.74887600 | -2.80736800 | 4.34476800  |
| H | -1.20455700 | -2.99984900 | 2.40762700  |
| H | -2.17242500 | -1.30669600 | 6.25328000  |
| C | 0.59177300  | -0.85849300 | 4.33075800  |
| C | 0.27760000  | -1.67988800 | 3.23027500  |
| C | 1.16948800  | -1.65827000 | 2.05783600  |
| H | 1.07281000  | -2.50504800 | 1.38153700  |
| H | 0.66149500  | -0.70042100 | 1.33998300  |

|   |            |             |            |
|---|------------|-------------|------------|
| H | 0.01140400 | -0.07261400 | 6.23863900 |
| C | 2.77628300 | -0.42904000 | 3.48818200 |
| C | 4.01514600 | 0.13792700  | 3.74176800 |
| C | 5.04701700 | -0.10550500 | 2.83218900 |
| C | 4.87457800 | -0.93128200 | 1.72137100 |
| C | 3.62404100 | -1.49162400 | 1.49942400 |
| C | 2.54086900 | -1.23199000 | 2.35297800 |
| H | 4.16632700 | 0.78617700  | 4.59498200 |
| H | 5.69481100 | -1.08054700 | 1.03140800 |
| H | 3.45743600 | -2.09496100 | 0.61605600 |
| N | 6.31159900 | 0.60570200  | 2.99341800 |
| O | 7.26660900 | 0.25810400  | 2.29592500 |
| O | 6.34312300 | 1.54369400  | 3.79748200 |
| O | 1.76098100 | -0.12768300 | 4.37793000 |

**[cat4]K/b13**

|   |             |             |             |
|---|-------------|-------------|-------------|
| C | 1.90395300  | 2.66306000  | -0.50694300 |
| C | 3.23017400  | 3.21115200  | -0.32961200 |
| C | 4.05920700  | 2.16346100  | -0.07452700 |
| C | 3.25224800  | 0.96348600  | -0.13452800 |
| N | 1.94273000  | 1.29635800  | -0.38088900 |
| H | 3.47030800  | 4.26347700  | -0.38678300 |
| H | 5.12354500  | 2.17664600  | 0.11366900  |
| C | 1.41395800  | -2.87847200 | -0.74885400 |
| C | 2.59272400  | -3.68201600 | -0.50090400 |
| C | 3.59209500  | -2.82140400 | -0.17001900 |
| C | 3.03044200  | -1.48746800 | -0.22076100 |
| N | 1.70632900  | -1.55247400 | -0.55956900 |
| H | 2.63011900  | -4.75920700 | -0.58533000 |
| H | 4.62196900  | -3.04428900 | 0.07086900  |
| C | -2.19994500 | 1.47970900  | -0.96579600 |
| C | -2.76896500 | 2.81067100  | -0.94108600 |
| C | -1.72922300 | 3.68418700  | -0.84833700 |
| C | -0.52193500 | 2.89148900  | -0.77983500 |
| N | -0.83460600 | 1.55737200  | -0.81517900 |
| H | -3.82501000 | 3.02662400  | -1.02332100 |
| H | -1.75311700 | 4.76504200  | -0.83291900 |
| C | -2.38465400 | -0.95009300 | -1.34254000 |
| C | -3.12578400 | -2.12656400 | -1.73587600 |
| C | -2.24746500 | -3.17064700 | -1.72232600 |
| C | -0.96902500 | -2.63608500 | -1.31626800 |
| N | -1.07810000 | -1.28584600 | -1.08237400 |
| H | -4.17362700 | -2.13204700 | -2.00194300 |
| H | -2.42820700 | -4.20625600 | -1.97524400 |

|    |             |             |             |
|----|-------------|-------------|-------------|
| C  | 0.76281300  | 3.43926200  | -0.71902400 |
| C  | 0.18432600  | -3.40901000 | -1.14449000 |
| C  | 3.78064000  | -0.32425800 | -0.02301000 |
| C  | -2.94552400 | 0.32993500  | -1.24323400 |
| Fe | 0.44071300  | 0.00921100  | -0.67586200 |
| Cl | 0.82273900  | 0.11571900  | -2.98289800 |
| O  | 0.15896300  | -0.15867700 | 1.02308200  |
| C  | 5.25607300  | -0.47201700 | 0.20604500  |
| C  | 5.76898400  | -0.60337000 | 1.50974700  |
| C  | 6.12587800  | -0.48652100 | -0.90379300 |
| C  | 7.14906300  | -0.74535200 | 1.68781100  |
| C  | 7.49953900  | -0.62875500 | -0.68326100 |
| C  | 8.03102400  | -0.76238500 | 0.60338900  |
| H  | 7.54407200  | -0.84354200 | 2.69738200  |
| H  | 8.17146300  | -0.63592400 | -1.53944500 |
| C  | 0.92395500  | 4.90412300  | -0.99789000 |
| C  | 0.92535000  | 5.31994000  | -2.34773400 |
| C  | 1.08328600  | 5.84975600  | 0.03312000  |
| C  | 1.09359800  | 6.67763500  | -2.63616100 |
| C  | 1.24704700  | 7.19897500  | -0.30052400 |
| C  | 1.25402200  | 7.63357000  | -1.62845800 |
| H  | 1.10331500  | 6.99572300  | -3.67706300 |
| H  | 1.37307500  | 7.92738200  | 0.49833000  |
| C  | -4.39956800 | 0.48598100  | -1.57870800 |
| C  | -4.76179400 | 0.95539200  | -2.86108300 |
| C  | -5.39875500 | 0.15806400  | -0.64233600 |
| C  | -6.11756600 | 1.10375600  | -3.16740000 |
| C  | -6.74437900 | 0.32640500  | -0.98690100 |
| C  | -7.12453000 | 0.79837800  | -2.24532200 |
| H  | -6.39561100 | 1.46673600  | -4.15517400 |
| H  | -7.51064500 | 0.08318600  | -0.25326600 |
| C  | 0.10414600  | -4.87584900 | -1.43897800 |
| C  | 0.50447900  | -5.34306000 | -2.70887800 |
| C  | -0.36936800 | -5.78039200 | -0.47127200 |
| C  | 0.41224900  | -6.71046400 | -2.98363100 |
| C  | -0.44191300 | -7.14237600 | -0.78282900 |
| C  | -0.05530200 | -7.62688700 | -2.03520000 |
| H  | 0.71307700  | -7.07052900 | -3.96570100 |
| H  | -0.80812500 | -7.83965200 | -0.03154000 |
| C  | 5.58193600  | -0.34810800 | -2.30703400 |
| H  | 4.85293200  | -1.13549800 | -2.53062800 |
| H  | 5.05400800  | 0.60352800  | -2.43806300 |
| H  | 6.38444200  | -0.40089700 | -3.04919100 |
| C  | 4.84017500  | -0.58638700 | 2.70085900  |

|   |             |             |             |
|---|-------------|-------------|-------------|
| H | 4.29770300  | 0.36361900  | 2.76385200  |
| H | 4.08266100  | -1.37510700 | 2.62463800  |
| H | 5.38937300  | -0.72757400 | 3.63728700  |
| C | 9.51592300  | -0.95016400 | 0.81248400  |
| H | 9.83483100  | -0.57556100 | 1.79132900  |
| H | 9.79120300  | -2.01246500 | 0.76450600  |
| H | 10.09816600 | -0.42995900 | 0.04392600  |
| C | 1.03044700  | -4.38056500 | -3.74879500 |
| H | 0.35937000  | -3.52598800 | -3.88735700 |
| H | 1.99601200  | -3.96103900 | -3.44170200 |
| H | 1.16641300  | -4.87773500 | -4.71417400 |
| C | -0.81288200 | -5.29204700 | 0.89050900  |
| H | -0.06793100 | -4.61470600 | 1.32726900  |
| H | -1.76728100 | -4.75077600 | 0.81297500  |
| H | -0.96386500 | -6.12481100 | 1.58441400  |
| C | -0.11282200 | -9.10305800 | -2.35342700 |
| H | -0.45712000 | -9.27761400 | -3.37913000 |
| H | 0.87884500  | -9.56611000 | -2.26299700 |
| H | -0.78682200 | -9.63616000 | -1.67453900 |
| C | -3.70806900 | 1.29564700  | -3.89130800 |
| H | -3.19354800 | 2.23099500  | -3.63990300 |
| H | -2.93247400 | 0.52439600  | -3.94722700 |
| H | -4.15447600 | 1.41257700  | -4.88372400 |
| C | -8.58197900 | 0.94632200  | -2.61590200 |
| H | -9.21392500 | 1.05519300  | -1.72806900 |
| H | -8.74541600 | 1.81887000  | -3.25829900 |
| H | -8.94051500 | 0.06689200  | -3.16750700 |
| C | -5.04235900 | -0.39906000 | 0.71577100  |
| H | -4.82976700 | -1.47570900 | 0.64985000  |
| H | -4.15449700 | 0.09865700  | 1.11898100  |
| H | -5.85504700 | -0.27286700 | 1.43667300  |
| C | 1.06714100  | 5.43180100  | 1.48573600  |
| H | 0.08938600  | 5.02270100  | 1.76912300  |
| H | 1.81137000  | 4.65433800  | 1.69075400  |
| H | 1.27437700  | 6.28130100  | 2.14401400  |
| C | 0.73448300  | 4.32059400  | -3.46664200 |
| H | 1.35361800  | 3.42703200  | -3.33508500 |
| H | -0.30275500 | 3.96456000  | -3.50070500 |
| H | 0.96862800  | 4.76890000  | -4.43730600 |
| C | 1.40413500  | 9.09841100  | -1.96817000 |
| H | 1.98291700  | 9.23890300  | -2.88795400 |
| H | 0.42503000  | 9.57017000  | -2.12684700 |
| H | 1.90523200  | 9.64871500  | -1.16451900 |
| K | -1.80719100 | -1.77699600 | 1.76548500  |

|   |             |             |            |
|---|-------------|-------------|------------|
| C | -1.04560700 | -1.80220200 | 5.75649400 |
| C | -2.23513200 | -1.23715600 | 5.34344500 |
| C | -2.22535100 | -0.12003200 | 4.46515200 |
| C | -0.96464900 | 0.43112800  | 4.05377800 |
| C | 0.25149200  | -0.20920200 | 4.45087800 |
| C | 0.19026600  | -1.30388000 | 5.29634600 |
| C | -3.40871800 | 0.49251400  | 3.93378400 |
| C | -0.92955600 | 1.55970600  | 3.15184400 |
| C | -2.12553200 | 2.17354100  | 2.77253600 |
| C | -3.35684300 | 1.64797600  | 3.16660400 |
| C | 0.32659700  | 1.89304800  | 2.51483500 |
| C | 1.58335200  | 1.65307900  | 3.32586200 |
| C | 1.58315300  | 0.21900800  | 3.86492400 |
| H | 1.79456600  | -0.45250600 | 3.02202600 |
| H | 1.63271100  | 2.37283600  | 4.15829600 |
| H | -1.06305600 | -2.64865500 | 6.43788300 |
| H | -3.17867200 | -1.64923600 | 5.67652900 |
| H | 1.11287000  | -1.78983500 | 5.60477900 |
| H | -4.28476400 | 2.07454500  | 2.80319800 |
| H | -2.09875800 | 3.01060700  | 2.08149800 |
| H | 0.31189900  | 2.79551800  | 1.91074700 |
| H | 0.30774000  | 0.90312000  | 1.62266500 |
| N | -4.68878500 | -0.18756700 | 3.97701400 |
| O | -4.68022900 | -1.43168000 | 3.90601700 |
| O | -5.71906900 | 0.48718800  | 3.99011400 |
| H | 2.38155200  | 0.07039600  | 4.60087700 |
| H | 2.46642800  | 1.82059300  | 2.70097800 |

**[cat4]K/b14**

|   |             |             |             |
|---|-------------|-------------|-------------|
| C | -2.55118500 | 1.85901300  | -0.72062700 |
| C | -2.99766200 | 3.22013500  | -0.53526300 |
| C | -1.88408800 | 4.00102600  | -0.51613500 |
| C | -0.75011300 | 3.12071400  | -0.69909000 |
| N | -1.18290200 | 1.81854100  | -0.79366500 |
| H | -4.03287200 | 3.51608100  | -0.44372700 |
| H | -1.81642400 | 5.07504600  | -0.41401600 |
| C | 2.92544700  | 0.95617300  | -1.29673800 |
| C | 3.79678800  | 2.10391500  | -1.40091500 |
| C | 3.01085000  | 3.21124500  | -1.25126400 |
| C | 1.65833100  | 2.73977600  | -1.05676300 |
| N | 1.63114600  | 1.36667900  | -1.08448200 |
| H | 4.86153300  | 2.05141000  | -1.58222200 |
| H | 3.29933600  | 4.25291100  | -1.28613200 |
| C | -1.70067600 | -2.32259300 | -1.22554400 |



|    |             |             |             |
|----|-------------|-------------|-------------|
| C  | -3.07117100 | -2.76185900 | -1.36853500 |
| C  | -3.85500900 | -1.65566800 | -1.27466000 |
| C  | -2.97076600 | -0.53281300 | -1.05531100 |
| N  | -1.66516900 | -0.96387200 | -1.02898800 |
| H  | -3.36884900 | -3.78925700 | -1.52150000 |
| H  | -4.93163400 | -1.58174200 | -1.33512000 |
| C  | 0.72055300  | -2.74376600 | -1.26827900 |
| C  | 1.86259200  | -3.62827200 | -1.36118600 |
| C  | 2.97061100  | -2.84107400 | -1.36977700 |
| C  | 2.51178100  | -1.46994900 | -1.29337700 |
| N  | 1.14132700  | -1.44310200 | -1.21340000 |
| H  | 1.79932200  | -4.70520800 | -1.42612800 |
| H  | 4.00763200  | -3.13701600 | -1.44280100 |
| C  | -3.41827300 | 0.77516500  | -0.87414200 |
| C  | 3.36884900  | -0.36981400 | -1.35322100 |
| C  | 0.56176000  | 3.57983400  | -0.83003200 |
| C  | -0.60509900 | -3.18386100 | -1.30190400 |
| Fe | -0.03269900 | 0.17365400  | -0.96542900 |
| Cl | -0.15630900 | 0.37051600  | -3.29496500 |
| O  | 0.21809000  | 0.05827600  | 0.74694600  |
| C  | 0.79956400  | 5.05981800  | -0.79666400 |
| C  | 1.06618800  | 5.72057100  | 0.41642100  |
| C  | 0.73625400  | 5.79288600  | -2.00089400 |
| C  | 1.27078400  | 7.10512900  | 0.41264400  |
| C  | 0.95078600  | 7.17342600  | -1.96388800 |
| C  | 1.22200900  | 7.84898100  | -0.76878700 |
| H  | 1.46901900  | 7.61376600  | 1.35435700  |
| H  | 0.89865200  | 7.73859800  | -2.89252400 |
| C  | -4.89115700 | 1.04850000  | -0.95238900 |
| C  | -5.46067100 | 1.29709500  | -2.22067500 |
| C  | -5.69259100 | 1.07333400  | 0.20414000  |
| C  | -6.83015200 | 1.55912700  | -2.30703100 |
| C  | -7.06012900 | 1.34701200  | 0.07144800  |
| C  | -7.64839000 | 1.58661500  | -1.17195100 |
| H  | -7.26875700 | 1.75289000  | -3.28421700 |
| H  | -7.67864500 | 1.37283300  | 0.96674700  |
| C  | -0.85751300 | -4.64801500 | -1.50087600 |
| C  | -1.13919700 | -5.13372000 | -2.79481700 |
| C  | -0.80086300 | -5.53055100 | -0.40576600 |
| C  | -1.38009100 | -6.50071700 | -2.96308400 |
| C  | -1.04873600 | -6.89101800 | -0.61817300 |
| C  | -1.34073100 | -7.39544900 | -1.88836000 |
| H  | -1.60200000 | -6.87681800 | -3.96013500 |
| H  | -1.01239200 | -7.57134100 | 0.23068600  |

|   |             |             |             |
|---|-------------|-------------|-------------|
| C | 4.83706300  | -0.62019300 | -1.52565000 |
| C | 5.36888500  | -0.72662500 | -2.82825300 |
| C | 5.67717900  | -0.76565000 | -0.40572400 |
| C | 6.73663400  | -0.96901900 | -2.98135400 |
| C | 7.04050400  | -1.01410400 | -0.60133400 |
| C | 7.59017800  | -1.11362400 | -1.88170800 |
| H | 7.14641400  | -1.05483700 | -3.98597600 |
| H | 7.68444800  | -1.13794000 | 0.26734400  |
| C | 0.43072700  | 5.09387400  | -3.30536200 |
| H | 1.17025200  | 4.31553000  | -3.52516100 |
| H | -0.54106700 | 4.58855300  | -3.26574600 |
| H | 0.41732300  | 5.80175700  | -4.13969300 |
| C | 1.14761400  | 4.95623300  | 1.71999100  |
| H | 0.33512200  | 4.22710700  | 1.81554800  |
| H | 2.10476100  | 4.41595100  | 1.79181700  |
| H | 1.09953300  | 5.62977700  | 2.58131100  |
| C | 1.47434000  | 9.33885900  | -0.76440800 |
| H | 1.31129000  | 9.77221000  | 0.22807200  |
| H | 2.50870900  | 9.56499800  | -1.05576200 |
| H | 0.81906800  | 9.85774100  | -1.47301600 |
| C | 4.46902400  | -0.58961400 | -4.03470700 |
| H | 3.67765200  | -1.34799800 | -4.02742900 |
| H | 3.96091400  | 0.38142100  | -4.04674800 |
| H | 5.03607400  | -0.69285500 | -4.96494800 |
| C | 5.13425200  | -0.64935900 | 1.00101400  |
| H | 5.06307600  | 0.40855900  | 1.30236300  |
| H | 4.13892500  | -1.09761100 | 1.08381300  |
| H | 5.78112400  | -1.14102000 | 1.73302200  |
| C | 9.06954300  | -1.35143800 | -2.07826100 |
| H | 9.26091300  | -1.98504200 | -2.95149000 |
| H | 9.60356100  | -0.40568500 | -2.24134700 |
| H | 9.51910900  | -1.83370000 | -1.20375000 |
| C | -1.18534800 | -4.19446600 | -3.97876500 |
| H | -2.04262900 | -3.51347600 | -3.91623700 |
| H | -0.29409800 | -3.55850200 | -4.02111600 |
| H | -1.26059000 | -4.74941900 | -4.91910900 |
| C | -1.57511500 | -8.87272000 | -2.10497100 |
| H | -1.90605000 | -9.36674100 | -1.18504400 |
| H | -2.33268000 | -9.04991500 | -2.87673100 |
| H | -0.65537300 | -9.37533300 | -2.43343500 |
| C | -0.45426700 | -5.02146800 | 0.97307300  |
| H | 0.60895100  | -4.75225600 | 1.03183600  |
| H | -1.02603800 | -4.12498900 | 1.22480700  |
| H | -0.65324100 | -5.77523400 | 1.74003100  |

|   |             |             |             |
|---|-------------|-------------|-------------|
| C | -5.11236100 | 0.79482000  | 1.57146900  |
| H | -4.98961700 | -0.28220800 | 1.73835800  |
| H | -4.12758900 | 1.24971100  | 1.70366800  |
| H | -5.76662200 | 1.17365900  | 2.36288700  |
| C | -4.60111600 | 1.28301200  | -3.46434400 |
| H | -3.77996000 | 2.00534500  | -3.39189200 |
| H | -4.13056800 | 0.30462300  | -3.61557000 |
| H | -5.19153300 | 1.52097200  | -4.35458500 |
| C | -9.13141000 | 1.84905700  | -1.29770500 |
| H | -9.33898100 | 2.62777300  | -2.04065900 |
| H | -9.66731800 | 0.94592000  | -1.61925900 |
| H | -9.56658300 | 2.16590500  | -0.34390400 |
| K | 2.23499400  | 1.43119100  | 1.74619400  |
| C | -2.38294600 | -4.14184200 | 3.83511900  |
| C | -1.54101500 | -3.02856400 | 3.81323800  |
| C | -1.74523100 | -1.98663100 | 2.89003500  |
| C | -2.82096300 | -2.09915700 | 1.99636500  |
| C | -3.65829300 | -3.21176000 | 2.01199100  |
| C | -3.44455900 | -4.24022500 | 2.93398700  |
| H | -2.20808800 | -4.93158200 | 4.56129000  |
| H | -0.72702100 | -2.96265500 | 4.52904000  |
| H | -2.98661700 | -1.30404600 | 1.28236300  |
| H | -4.46714800 | -3.27669200 | 1.29074500  |
| H | -4.09519500 | -5.11030100 | 2.94594300  |
| C | -0.92176900 | -0.73119400 | 2.90023400  |
| C | -1.70067300 | 0.50003700  | 3.30965400  |
| C | -1.52679600 | 1.72941200  | 2.65066300  |
| C | -2.61769700 | 0.44251300  | 4.37307200  |
| C | -2.23428000 | 2.86540800  | 3.04925400  |
| C | -3.32002300 | 1.57897700  | 4.77688000  |
| H | -2.78159000 | -0.50410900 | 4.88008000  |
| C | -3.12989400 | 2.79667000  | 4.11845000  |
| H | -2.11226700 | 3.78992500  | 2.49208300  |
| H | -4.02365600 | 1.51014800  | 5.60258900  |
| H | -3.68918100 | 3.67708100  | 4.42327000  |
| H | -0.49003800 | -0.43170700 | 1.59626600  |
| C | 0.43981700  | -0.87001200 | 3.46906900  |
| C | 1.30242100  | -1.87337500 | 2.95397500  |
| C | 0.97038100  | 0.02284600  | 4.42960900  |
| C | 2.62999200  | -1.95688300 | 3.34205500  |
| H | 0.92013400  | -2.55385800 | 2.20053300  |
| C | 2.30383600  | -0.05005100 | 4.82961400  |
| C | 3.13207100  | -1.02518300 | 4.26339000  |
| H | 3.29449900  | -2.70229500 | 2.92240400  |

|   |             |             |            |
|---|-------------|-------------|------------|
| H | 0.32042900  | 0.77350500  | 4.86806800 |
| H | 2.71099100  | 0.63004500  | 5.56924800 |
| N | 4.55098300  | -1.04446600 | 4.60543800 |
| O | 5.24216900  | -1.95992700 | 4.14976100 |
| O | 4.98433000  | -0.13010400 | 5.31369500 |
| H | -0.88524900 | 1.76932700  | 1.77774100 |

**[cat4]K/b15**

|    |             |             |             |
|----|-------------|-------------|-------------|
| C  | -3.24055500 | 1.89464000  | -0.02832800 |
| C  | -4.60830700 | 2.02340000  | -0.48022300 |
| C  | -5.18660200 | 0.79068600  | -0.34706400 |
| C  | -4.15766800 | -0.10736100 | 0.12517300  |
| N  | -2.98391000 | 0.58519000  | 0.29736200  |
| H  | -5.06741000 | 2.94975300  | -0.79731200 |
| H  | -6.20883700 | 0.50138300  | -0.55004400 |
| C  | -1.23570700 | -3.17321000 | 0.82229100  |
| C  | -2.10157700 | -4.30714800 | 0.58308100  |
| C  | -3.35870200 | -3.81337500 | 0.40869700  |
| C  | -3.25672500 | -2.37031100 | 0.48505200  |
| N  | -1.95555300 | -2.01460000 | 0.73541700  |
| H  | -1.77368100 | -5.33766000 | 0.59653100  |
| H  | -4.27854700 | -4.35520900 | 0.23728500  |
| C  | 0.50433000  | 2.05100400  | 2.06424000  |
| C  | 0.57397700  | 3.49080100  | 2.16132100  |
| C  | -0.43320900 | 3.98823200  | 1.39123900  |
| C  | -1.15843900 | 2.85233800  | 0.86318700  |
| N  | -0.55684000 | 1.69057000  | 1.27556000  |
| H  | 1.32143800  | 4.03015100  | 2.72577700  |
| H  | -0.69597300 | 5.02129900  | 1.21167200  |
| C  | 1.38483500  | -0.20181800 | 2.46028600  |
| C  | 2.40262200  | -1.11376400 | 2.92944200  |
| C  | 2.08434900  | -2.34441600 | 2.44609000  |
| C  | 0.82932600  | -2.21017900 | 1.73486400  |
| N  | 0.44040500  | -0.89574500 | 1.74422100  |
| H  | 3.25509500  | -0.82472600 | 3.52736200  |
| H  | 2.63266700  | -3.26761300 | 2.55972800  |
| C  | -2.36440500 | 2.97126800  | 0.16562600  |
| C  | 0.10258300  | -3.28785000 | 1.20957700  |
| C  | -4.32135600 | -1.49448900 | 0.25261300  |
| C  | 1.42105000  | 1.17907400  | 2.65711300  |
| Fe | -1.20622100 | -0.16157100 | 0.93575000  |
| Cl | -2.15484700 | -0.13357300 | 3.09973400  |
| O  | -0.64305600 | -0.22597300 | -0.70137300 |
| H  | 0.45998900  | -0.11318700 | -1.21523300 |

|   |             |             |             |
|---|-------------|-------------|-------------|
| C | 1.47727500  | 0.12103000  | -2.14183900 |
| C | 2.46896800  | -0.97638300 | -1.91088500 |
| C | 2.94673100  | -1.82910900 | -2.92644000 |
| C | 2.93803600  | -1.19280800 | -0.60135600 |
| C | 3.77160300  | -2.90859300 | -2.63805700 |
| H | 2.67015300  | -1.64334300 | -3.95721800 |
| C | 3.77277300  | -2.25709900 | -0.29759300 |
| H | 2.60579800  | -0.53398100 | 0.19018200  |
| C | 4.14775400  | -3.13606800 | -1.31411100 |
| H | 4.11137100  | -3.58266900 | -3.41470200 |
| H | 4.09305000  | -2.44204200 | 0.71762400  |
| C | 0.65810400  | 0.05683900  | -3.39043200 |
| C | 0.09277800  | -1.16397600 | -3.83356000 |
| C | 0.33719100  | 1.21730400  | -4.12757800 |
| C | -0.72222000 | -1.22225300 | -4.96498000 |
| H | 0.29897600  | -2.07362000 | -3.27999600 |
| C | -0.49952200 | 1.16383400  | -5.24731800 |
| H | 0.76022800  | 2.16810000  | -3.82046400 |
| C | -1.03361000 | -0.05513800 | -5.68011000 |
| H | -1.11593900 | -2.18241400 | -5.29124100 |
| H | -0.71939400 | 2.07838000  | -5.79265500 |
| C | 1.89670700  | 1.50016200  | -1.74245200 |
| C | 3.11845900  | 2.06042800  | -1.91525800 |
| H | 1.10098900  | 2.10630400  | -1.31362900 |
| C | 4.19857000  | 1.32615800  | -2.64346200 |
| C | 5.32825400  | 0.84569900  | -1.96605600 |
| C | 4.08968300  | 1.10168600  | -4.02249800 |
| C | 6.30459300  | 0.11816800  | -2.64505800 |
| H | 5.42000300  | 1.01948500  | -0.89823300 |
| C | 5.07519000  | 0.38809600  | -4.70698700 |
| H | 3.21756400  | 1.47428100  | -4.55230200 |
| C | 6.18040900  | -0.11400800 | -4.01797100 |
| H | 7.16102200  | -0.27247800 | -2.10215000 |
| H | 4.97483100  | 0.21815800  | -5.77595100 |
| H | 6.94214000  | -0.68149500 | -4.54571600 |
| C | 3.42633900  | 3.43859200  | -1.45814800 |
| C | 4.48678100  | 4.16420700  | -2.03145900 |
| C | 2.66635200  | 4.06621100  | -0.45447900 |
| C | 4.76313200  | 5.47026400  | -1.62563600 |
| H | 5.09308600  | 3.70276900  | -2.80411800 |
| C | 2.94006900  | 5.36930800  | -0.05134000 |
| H | 1.87213600  | 3.52285400  | 0.03887700  |
| C | 3.99142200  | 6.08174600  | -0.63579900 |
| H | 5.58621700  | 6.01070700  | -2.08610100 |

|   |             |             |             |
|---|-------------|-------------|-------------|
| H | 2.33786800  | 5.81941600  | 0.73361900  |
| H | 4.21215600  | 7.09669200  | -0.31633400 |
| C | -5.70017900 | -2.06474400 | 0.11847100  |
| C | -6.49231700 | -2.18848000 | 1.27999300  |
| C | -6.20177600 | -2.48716600 | -1.12605100 |
| C | -7.77541300 | -2.73089800 | 1.16564500  |
| C | -7.49069600 | -3.02695700 | -1.19875600 |
| C | -8.29461400 | -3.15372400 | -0.06297800 |
| H | -8.38483500 | -2.83138700 | 2.06176300  |
| H | -7.87314700 | -3.35910300 | -2.16215100 |
| C | -2.78794200 | 4.33689600  | -0.28096100 |
| C | -2.25753600 | 4.87147700  | -1.47237300 |
| C | -3.69026600 | 5.09526300  | 0.49467200  |
| C | -2.67013100 | 6.14006500  | -1.89330700 |
| C | -4.07392200 | 6.36092500  | 0.03975200  |
| C | -3.58036300 | 6.89947300  | -1.15300500 |
| H | -2.26430600 | 6.54796200  | -2.81728300 |
| H | -4.77161400 | 6.94480400  | 0.63718800  |
| C | 2.48339200  | 1.75825000  | 3.53921500  |
| C | 3.78865300  | 1.97245500  | 3.05824800  |
| C | 2.14575400  | 2.10173900  | 4.86691100  |
| C | 4.74197100  | 2.53461900  | 3.91622700  |
| C | 3.13001900  | 2.65435500  | 5.68992700  |
| C | 4.43429500  | 2.87852000  | 5.23399700  |
| H | 5.74842800  | 2.70946100  | 3.54052900  |
| H | 2.87206800  | 2.91964400  | 6.71363400  |
| C | 0.82381600  | -4.58931300 | 1.03920800  |
| C | 1.26842600  | -4.92607400 | -0.25898900 |
| C | 1.16962600  | -5.40437000 | 2.13354900  |
| C | 2.16364900  | -5.98357200 | -0.41807000 |
| C | 2.07227700  | -6.45714300 | 1.93091700  |
| C | 2.62228800  | -6.72680100 | 0.67523000  |
| H | 2.55696400  | -6.20005500 | -1.40881700 |
| H | 2.37059100  | -7.06420600 | 2.78349100  |
| C | -4.22010400 | 4.56269200  | 1.80713600  |
| H | -4.90433000 | 3.71994400  | 1.65580400  |
| H | -3.40676400 | 4.18946600  | 2.43938000  |
| H | -4.75752800 | 5.34042000  | 2.35842900  |
| C | -1.22502100 | 4.10980100  | -2.27375500 |
| H | -0.26272700 | 4.07833500  | -1.74765300 |
| H | -1.51905700 | 3.06732600  | -2.43939000 |
| H | -1.05664400 | 4.57496800  | -3.25054500 |
| C | -3.98949100 | 8.28248500  | -1.60448800 |
| H | -3.37627600 | 9.05370000  | -1.11937300 |

|   |              |             |             |
|---|--------------|-------------|-------------|
| H | -3.87047800  | 8.40415300  | -2.68649100 |
| H | -5.03435500  | 8.49436400  | -1.35180000 |
| C | 4.18318900   | 1.58948000  | 1.64990800  |
| H | 4.49424100   | 0.53743400  | 1.59791100  |
| H | 3.35773100   | 1.70956500  | 0.94556800  |
| H | 5.01781700   | 2.20277300  | 1.29510600  |
| C | 0.73960000   | 1.89483200  | 5.38353400  |
| H | 0.04501100   | 2.61799600  | 4.93838600  |
| H | 0.34805200   | 0.90564700  | 5.12370300  |
| H | 0.69909900   | 2.01321600  | 6.47094400  |
| C | 5.48338000   | 3.45674100  | 6.15549900  |
| H | 5.87916900   | 2.68996000  | 6.83484300  |
| H | 6.33008500   | 3.86623300  | 5.59434100  |
| H | 5.07076000   | 4.25765200  | 6.77982100  |
| C | 0.78580800   | -4.15137600 | -1.46239200 |
| H | -0.27613400  | -4.35236100 | -1.65483400 |
| H | 0.88084600   | -3.07431500 | -1.30280200 |
| H | 1.35455200   | -4.41876200 | -2.35674400 |
| C | 0.59080600   | -5.14989500 | 3.50888600  |
| H | 1.07739300   | -4.30753000 | 4.01422800  |
| H | -0.47470400  | -4.90261400 | 3.44933300  |
| H | 0.70490200   | -6.03174900 | 4.14742400  |
| C | 3.71105500   | -7.75385700 | 0.48277300  |
| H | 3.47493600   | -8.44534700 | -0.33500700 |
| H | 4.64834400   | -7.24678500 | 0.22032100  |
| H | 3.88124300   | -8.34213000 | 1.39038000  |
| C | -5.36672400  | -2.35910900 | -2.38131300 |
| H | -5.25528200  | -1.30170900 | -2.66556100 |
| H | -4.36619500  | -2.78573000 | -2.23682600 |
| H | -5.83432800  | -2.87315800 | -3.22681400 |
| C | -5.95280900  | -1.75047700 | 2.62171100  |
| H | -5.04224300  | -2.30040500 | 2.88485300  |
| H | -5.66721300  | -0.69265900 | 2.61444900  |
| H | -6.69172900  | -1.90486400 | 3.41404300  |
| C | -9.69547900  | -3.71270700 | -0.15602400 |
| H | -10.44305600 | -2.90831600 | -0.15160900 |
| H | -9.83953900  | -4.28946300 | -1.07580800 |
| H | -9.92187900  | -4.36708400 | 0.69339200  |
| H | -1.66281700  | -0.10105100 | -6.56477800 |
| N | 4.89304800   | -4.34387900 | -0.97311400 |
| O | 5.25558300   | -4.49354200 | 0.19602600  |
| O | 5.09622400   | -5.17077600 | -1.86870600 |
| K | -2.53195300  | -0.03798500 | -2.49648000 |
